# Supplementary material
Source: PubMed Central journal article supplement (PMC6755727)
Supplement: JB.00270-19-s0001.pdf [file JB.00270-19-s0001.pdf]

## Supplemental Materials

Chitin heterodisaccharide, released from chitin by chitinase and chitin oligosaccharide deacetylase, enhances the chitin-metabolizing ability of *Vibrio parahaemolyticus*

Takako Hirano<sup>#</sup>, Manabu Okubo, Hironobu Tsuda, Masahiro Yokoyama, Wataru Hakamata, and  
Toshiyuki Nishio

*Department of Chemistry and Life Science, College of Bioresource Sciences, Nihon University,  
1866 Kameino, Fujisawa, Kanagawa 252-0880, Japan*

<sup>#</sup>Address correspondence to Takako Hirano, [hirano.takako@nihon-u.ac.jp](mailto:hirano.takako@nihon-u.ac.jp)

**Supplemental Figures**

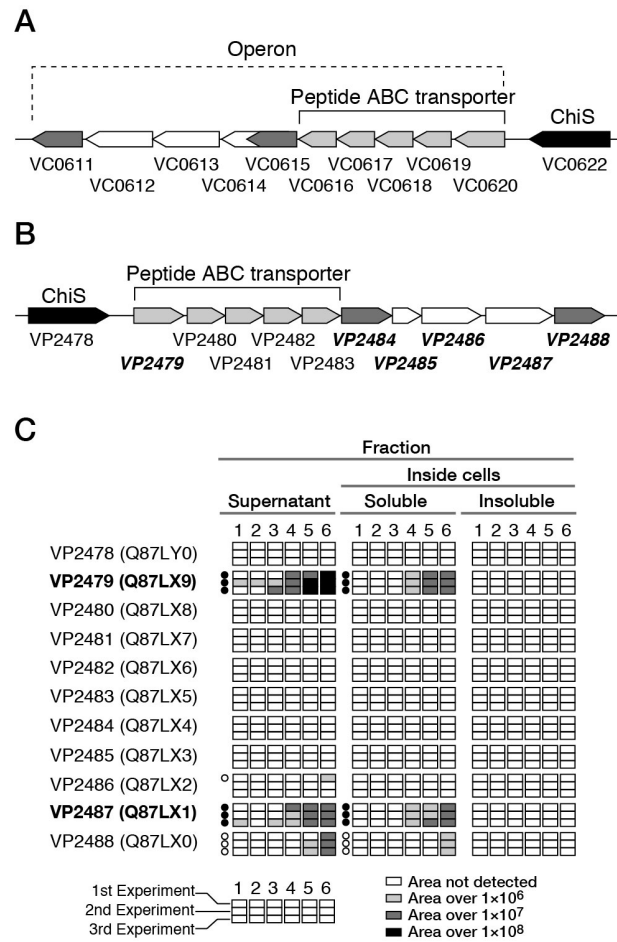

Fig. S1 Gene cluster of the ABC transporter for taking up (GlcNAc)<sub>2</sub> and ChiS.

(A) Gene cluster of ABC transporter in the *Vibrio cholerae* O1 EI Tor N16961 genome. (B) Gene cluster of the ABC transporter in the *Vibrio parahaemolyticus* RIMD2210633 genome. (C) Results of peptide mass fingerprinting analysis of the proteins encoded by the genes shown in B.

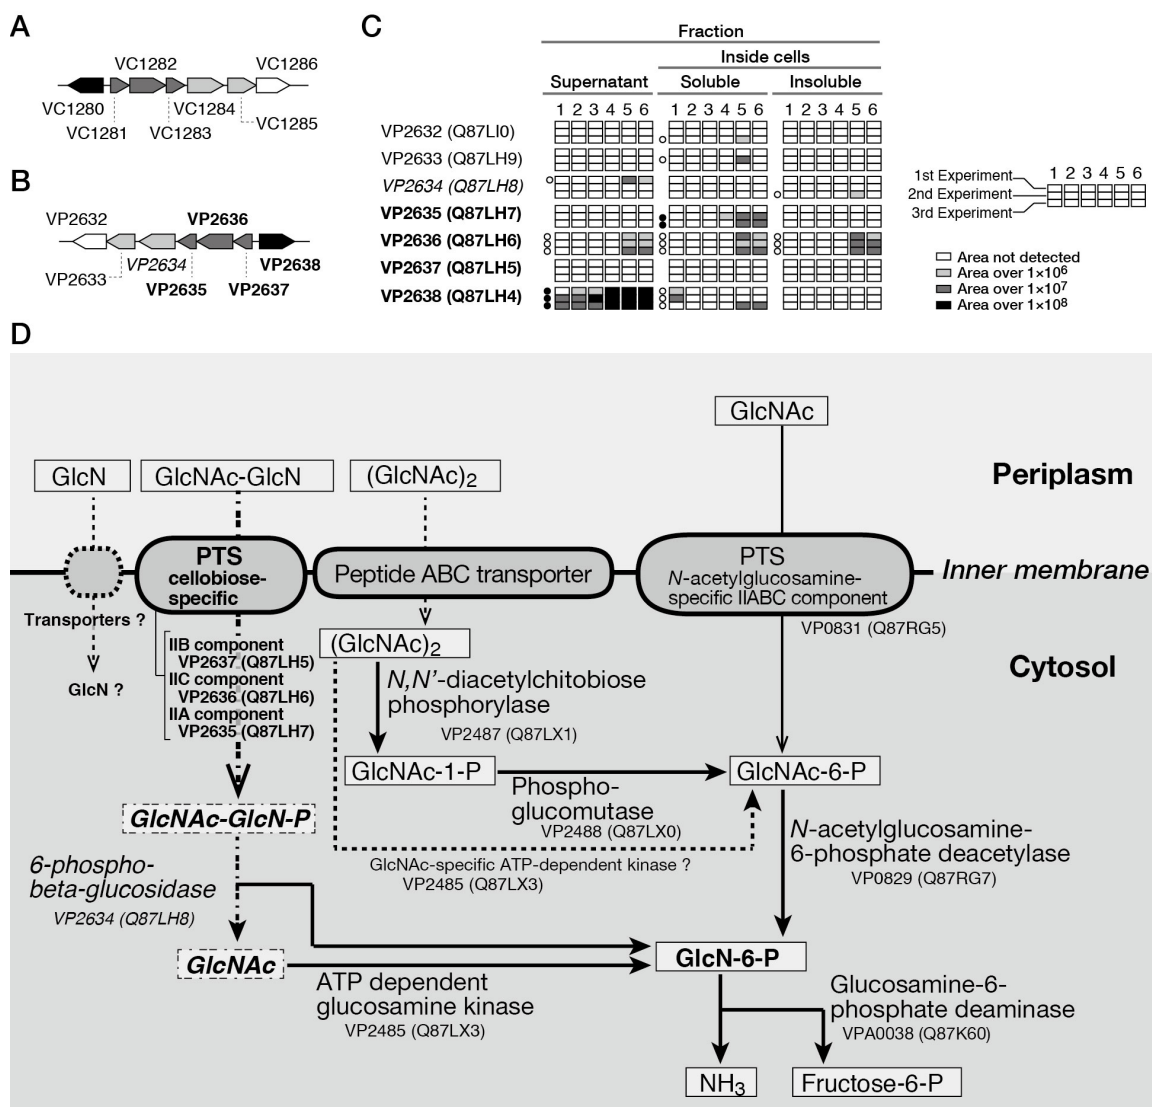

Fig. S2 Analysis of peptide mass fingerprinting (PMF) data and annotation of the gene cluster as a cellobiose-specific PTS and COD, and hypothetical pathway in the cytosol.

(A) Gene cluster of the cellobiose-specific PTS and COD in the *V. cholerae* O1 EI Tor N16961 genome. (B) Gene cluster of the cellobiose-specific PTS and COD in the *V. parahaemolyticus* RIMD2210633 genome. (C) Results of PMF analysis of the proteins encoded by the genes shown in B. (D) Hypothetical pathway in the cytosol of *V. parahaemolyticus* RIMD2210633. In B, C, and D, bold type and italics indicate proteins induced by GlcNAc-GlcN and the enzyme hypothetically functioning in this pathway, respectively. The reaction of endoglucanase-like protein (VP2484, Fig. 1 in main text) of *V. cholerae* does not hydrolyze (GlcNAc)<sub>2</sub> or (GlcN)<sub>2</sub> (20), and therefore, it does not act on phosphorylated (GlcN)<sub>2</sub>. Thus, this enzyme cannot hydrolyze phosphorylated GlcNAc-GlcN, even if this heterodisaccharide could be transported via the PTS (VP2635-VP2637). Based on these data, we hypothesize that GlcNAc-GlcN is carried from the periplasm to the cytosol and phosphorylated by the PTS (VP2635-VP2637) (Fig. S2D). It is then hydrolyzed by another enzyme, such as 6-phospho-β-glucosidase (VP2634, EC 3.2.1.86) (Fig. S2D), which is a component of the PTS cluster that was detected twice at low coverage in our PMF analyses (Fig. S2C). With respect to the effect of GlcNAc-GlcN on gene expression, as we have already characterized the COD gene located adjacent to the PTS cluster (VP2635-VP2637), in a subsequent study we will investigate other genes within this cluster, including 6-phospho-β-glucosidase.



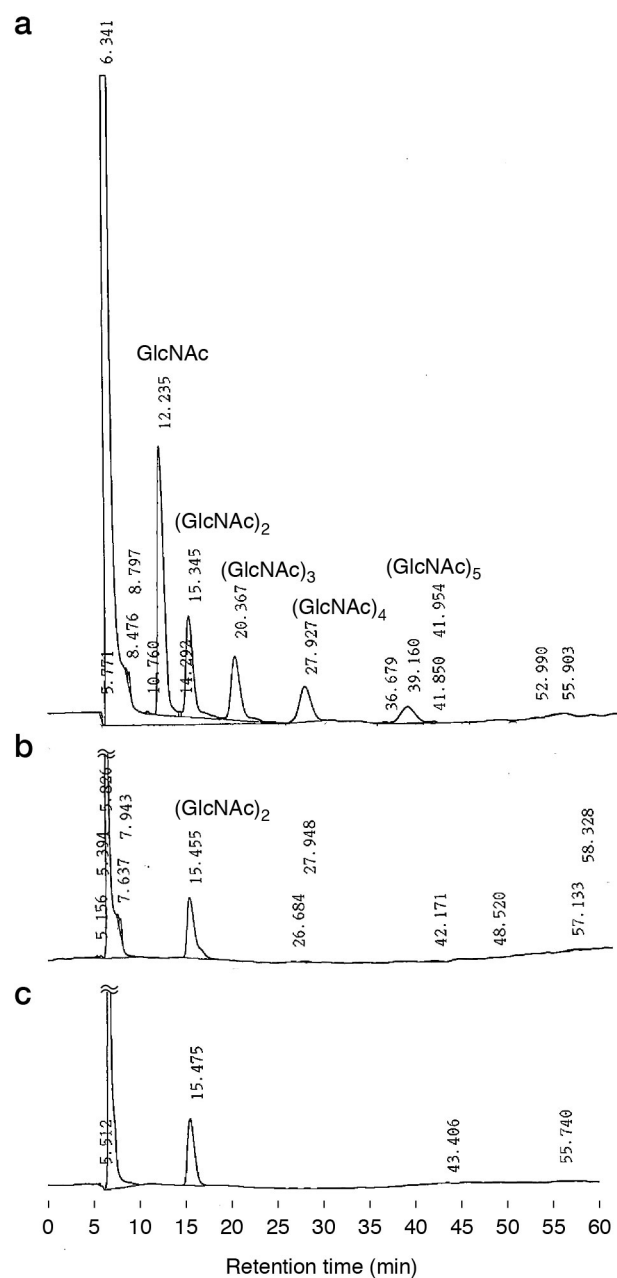

Fig. S4 HPLC analysis of purified (GlcNAc)<sub>2</sub>.

HPLC analysis was performed using an LC-20 AD pump (Shimadzu, Kyoto, Japan) equipped with a Shodex RI-101 differential refractometer (Show Denko, Tokyo, Japan) and COSMOSIL Sugar-D column (Ø4.5×250 mm, Nacalai Tesque, Kyoto, Japan). The analysis was conducted under the following conditions: mobile phase, acetonitrile/water 3:1 (v/v); flow rate, 0.5 mL/min; temperature, 30°C. **(a)** HPLC chromatograph of chitin oligosaccharides containing *N*-acetylglucosamine (Tokyo Chemical Industry, Tokyo, Japan). **(b)** HPLC chromatograph of (GlcNAc)<sub>2</sub> purchased from Seikagaku (Tokyo, Japan). **(c)** HPLC chromatograph of (GlcNAc)<sub>2</sub> produced from a mixture of GlcNAc and GlcNAc oligomers by Denazyme CBB-P1 (Nagase chemtaX, Osaka, Japan) and purified according to the method described in main text.

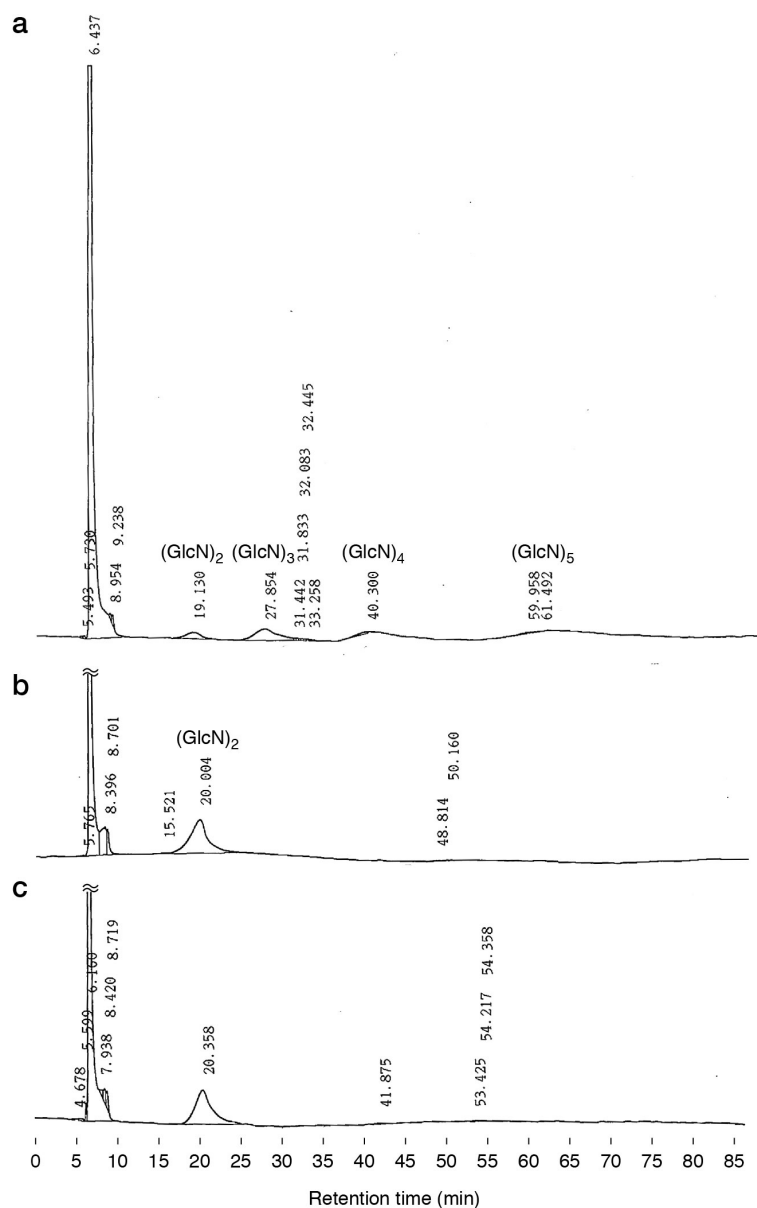

Fig. S5 HPLC analysis of purified (GlcN)<sub>2</sub>.

HPLC analysis was performed using an LC-20 AD pump equipped with a Shodex RI-101 differential refractometer and COSMOSIL Sugar-D column (Ø4.5×250 mm). The analysis was conducted under the following conditions: mobile phase, acetonitrile/water 3:1 (v/v); flow rate, 0.5 mL/min; temperature, 30°C. **(a)** HPLC chromatograph of chitosan oligosaccharides (Tokyo Chemical Industry). **(b)** HPLC chromatograph of chitosan dimer [(GlcN)<sub>2</sub>·2HCl] purchased from Seikagaku Kogyo. **(c)** HPLC chromatograph of (GlcN)<sub>2</sub> produced from GlcN oligomers (chitosan oligosaccharides) treated with chitosanase L (HBI Enzymes, Hyogo, Japan) and purified according to the method described in main text and Supplemental Method 1.

## *Supplemental Tables*

### Table S1 Raw data from PMF analyses

Raw data from three PMF analyses are shown in the last pages of this document. The following information is shown in each column. Accession and Description correspond to UniProt ID and protein name, respectively. The specific coverage of each protein is shown in the blue-highlighted column. Peak area data are also shown in this Table, and colored dark-orange for high peak area. Proteins indicated by red font are shown in Figs. 1 and S3, and proteins indicated in blue font are also discussed in the main text.

Table S2 Primers used for RT-qPCR in this study

| Protein name                                                                        |         |            | Primer (5'→3')                        | Annealing        |
|-------------------------------------------------------------------------------------|---------|------------|---------------------------------------|------------------|
| NCBI Gene ID                                                                        | KEGG ID | UniProt ID | (F: Forward prime, R: Reverse primer) | temperature (°C) |
| <b>Target genes</b>                                                                 |         |            |                                       |                  |
| Chitinase                                                                           |         |            | F: GTGATGCATCTGTATTGCTG               |                  |
| 1188094                                                                             | VP0619  | Q87S05     | R: CCAAGTCCGGTCAATTACATG              | 55.1             |
| Chitinase                                                                           |         |            | F: GATTGCGACAGACAATGAAG               |                  |
| 1189851                                                                             | VP2338  | Q87MB8     | R: GTGAGAGTAATGCTAGGTGG               | 55.1             |
| Chitinase                                                                           |         |            | F: GATGCAGACAACGATACTCTTAC            |                  |
| 1190734                                                                             | VPA0055 | Q87K43     | R: CCATTGCCGAGATTTCACTG               | 55.1             |
| Chitinase                                                                           |         |            | F: CTCAGTTAACGTGCCATACAAAG            |                  |
| 1191873                                                                             | VPA1177 | Q87GY8     | R: CATTGTCCAACCACAAAAGAAG             | 55.1             |
| Chitin oligosaccharide deacetylase (COD)                                            |         |            | F: GGATCCAGCAACTAATTGGAC              |                  |
| 1190182                                                                             | VP2638  | Q87LH4     | R: GTCCAGTCTGCTTGAGATAC               | 55.1             |
| Chitopolin                                                                          |         |            | F: GGCTCACTACAAGTTAGGTC               |                  |
| 1188256                                                                             | VP0760  | Q87RL8     | R: CCAAGTTTGACCTTCAGATTC              | 55.1             |
| Chitodextrinase                                                                     |         |            | F: CATTTACGAACAACACAGGTC              |                  |
| 1191521                                                                             | VPA0832 | Q87HX4     | R: GAAGCAATCACTTTCAAACCG              | 55.1             |
| $\beta$ -N-acetyl-hexisosaminidase                                                  |         |            | F: CTGAAGGTAGCAGAAGAGTC               |                  |
| 1190001                                                                             | VP2486  | Q87LX2     | R: GTCGGTCTTTGATTGAACAG               | 55.1             |
| $\beta$ -N-acetyl-hexisosaminidase                                                  |         |            | F: CAGTGACGAGTGGTCTAAG                |                  |
| 1188251                                                                             | VP0755  | Q87RM3     | R: GTAGTAACCACGCTCTTTTCG              | 55.1             |
| Periplasmic peptide-binding protein                                                 |         |            | F: CGTTGAAGGTGCTAAGAAAC               |                  |
| 1189994                                                                             | VP2479  | Q87LX9     | R: GTACTGTGTTGTTGAAGTCC               | 60.8             |
| N,N'-diacetyl- chitobiose phosphorylase                                             |         |            | F: GAAGTTCGTCATGGTTTGTG               |                  |
| 1190002                                                                             | VP2487  | Q87LX1     | R: GGTTTGTGACAGAGGTGTTCTTG            | 55.1             |
| Phosphoglucomutase                                                                  |         |            | F: GATTGCAAATCAAACCAGC                |                  |
| 1190003                                                                             | VP2488  | Q87LX0     | R: GTAGTAATGGCTCAGTACCAG              | 60.8             |
| N-acetylglucosamine-6-phosphate deacetylase                                         |         |            | F: CAGGCATTGTGGTATCAATC               |                  |
| 1188326                                                                             | VP0829  | Q87RG7     | R: GCATTGAATAGGTGAGTTGC               | 55.1             |
| Endoglucanase-like protein                                                          |         |            | F: CAATGGTGGTTTGGAACATC               |                  |
| 1189999                                                                             | VP2484  | Q87LX4     | R: GCTCCACTTATCAAAGACCG               | 55.1             |
| ATP dependent glucosamine kinase<br>(Putative GlcNAc-specific ATP-dependent kinase) |         |            | F: CCTTAAAGGATTGGAGCAGC               |                  |
| 1190000                                                                             | VP2485  | Q87LX3     | R: CTAGAGGCGTTTTCTCTCTG               | 58.2             |
| Glucosamine-6-phosphate deaminase                                                   |         |            | F: CTCGCATCAAGACACTAACTG              |                  |
| 1190717                                                                             | VPA0038 | Q87K60     | R: CTTCTAGTGCAAGTGCTTTG               | 55.1             |
| N-acetylglucosamine-binding protein A                                               |         |            | F: CAAGCTGGTCAATATTCGGAAG             |                  |
| 1192294                                                                             | VPA1598 | Q87FT0     | R: CAATTCAACACGCTCAAGG                | 55.1             |
| <b>House-keeping gene</b>                                                           |         |            |                                       |                  |
| RNA polymerase sigma factor RpoD (RpoD)                                             |         |            | F: CCAAGTTCAATCGTCTGTTG               |                  |
| 1187872                                                                             | VP0404  | Q87SL8     | R: GTTCTTCTGCCTGAACCTTATC             | 55.1             |

Primers were designed using Primer-BLAST (<https://www.ncbi.nlm.nih.gov/tools/primer-blast/>) with DNA sequences shown as Gene IDs enrolled in the NCBI database. Before using the designed primers, we checked the secondary structure of single-strand DNA using the DNA folding form of the mfold web server (<http://unafold.rna.albany.edu/?q=mfold/DNA-Folding-Form>). The two other IDs and the names of each protein on this table correspond to Fig. 1 in main manuscript. Before using these primer sets for RT-qPCR, we confirmed that each part of target gene amplified by PCR produced a single band on polyacrylamide gel electrophoresis, and the



size of the DNA band on the gel corresponded with its theoretical value. Moreover, we confirmed that the part of the DNA sequence amplified in RT-qPCR corresponded to the appropriate target gene according to the following steps. After electrophoresis of the RT-qPCR products on polyacrylamide gels, the amplified DNAs were extracted and purified from the gels using an E.Z.N.A.<sup>®</sup> Poly-Gel DNA Extraction kit (OMEGA bio-tek, GA, USA), and the obtained DNAs were used for DNA sequencing carried out on an ABI 3130xl DNA sequencer using only one primer of each primer set and a Big Dye Terminator V3.1 Cycle Sequencing kit (Applied Biosystems, Carlsbad, CA, USA).

### ***Supplemental Methods***

#### Method 1 Preparation of (GlcN)<sub>2</sub>.

We produced (GlcN)<sub>2</sub> from GlcN oligomers (chitosan oligosaccharides, Tokyo Chemical Industry, Japan) by hydrolysis using chitosanase L (HBI Enzymes, Hyogo, Japan), which was dialyzed in 0.5 M sodium acetate buffer (pH 5.2). A total of 0.9 g of GlcN oligomer was dissolved in 30 mL of 0.5 M sodium acetate buffer (pH 5.2), and approximately 1 mL of chitosanase L solution was added. Then, the mixture was incubated at 40°C for 16 h until GlcN oligomers were hydrolyzed into (GlcN)<sub>2</sub> and GlcN. The reaction mixture was chromatographed on a cation-exchange column (ø 1 cm × 10 cm) packed with Dowex 50W-X8, 200-400 mesh resin (FUJIFILM Wako Pure Chemical, Osaka, Japan) and extensively washed with H<sub>2</sub>O. GlcN was eluted with 0.5 M HCl, and (GlcN)<sub>2</sub> was eluted using 1.0 M HCl. All of the solution containing (GlcN)<sub>2</sub> was chromatographed on an anion-exchange column (ø 3 cm × 15 cm) packed with IRA96SB resin (Organo, Tokyo, Japan), which had been activated as the OH<sup>-</sup> form, in order to remove HCl. (GlcN)<sub>2</sub> was eluted from this column using approximately 350 mL of H<sub>2</sub>O. The pH of the sample at this step was almost neutral. A few drops of 0.2 M HCl were then added in order to make the pH approximately 6.0, and the solution was evaporated with some ethanol using a rotary evaporator at room temperature until the volume was <50 mL. The solution was then filtered using a 0.45-μm cellulose acetate filter (DISMIC-13CP, Advantec MFS, CA, USA) and evaporated until the volume was approximately 2 mL. The solution was then dispensed into two centrifuge tubes (Nalgene<sup>™</sup> Oak Ridge High-Speed Centrifuge Tubes, Thermo Fisher Scientific, MA, USA), cooled acetone was added to each tube, and the tubes were stored at 4°C to precipitate (GlcN)<sub>2</sub>. The tubes were sealed with sealing cap assemblies (Thermo Fisher Scientific) in which the O-rings were replaced with chemical-resistant O-rings (Kalrez<sup>®</sup>, AS568 O-RING, Compound: 6375, Dow DuPont, MI, USA); (GlcN)<sub>2</sub> was collected by centrifugation at 4°C and 3,000 ×g for 5 min, and most of the acetone was removed from the tubes using a pipette. Cooled acetone was then added again, and the tubes were centrifuged to

wash the (GlcN)<sub>2</sub>. To remove the remaining acetone from the (GlcN)<sub>2</sub> precipitate, the tubes were placed on ice and stored in a fume hood. Finally, the precipitate was dissolved in a small amount of H<sub>2</sub>O to obtain purified (GlcN)<sub>2</sub> in solution.

**Method 2** Preparation of samples for LC-MS/MS analysis of proteins from SDS-PAGE gel fragments.

A 100- $\mu$ L volume of a solution of 15 mM potassium ferricyanide and 50 mM sodium thiosulfate was added to each gel slice, and the sample was shaken for 10 min at room temperature. The solution was then removed, 500  $\mu$ L of Milli-Q water was added, and the sample was shaken for 15 min. This step was repeated until the yellow solution was decolorized, after which 100  $\mu$ L of acetonitrile was added, and the sample was shaken for 10 min. The acetonitrile was removed, and the gel slices were dried by evaporating. Next, 100  $\mu$ L of solution containing 10 mM DTT and 25 mM ammonium hydrogen carbonate was added, and the sample was incubated at 56°C for 1 h with shaking in the dark. This solution was removed, and 100  $\mu$ L of 25 mM ammonium hydrogen carbonate was added as a wash buffer and shaken for 10 min. The wash buffer was removed, and 100  $\mu$ L of solution containing 55 mM iodoacetamide and 25 mM ammonium hydrogen carbonate was added to the sample tube and shaken for 45 min in the dark. The solution was removed, 100  $\mu$ L of wash buffer was added, and the tube was shaken for 10 min. The solution was removed, 200  $\mu$ L of 50% acetonitrile and 25 mM ammonium hydrogen carbonate was added for dehydration, and the tubes were shaken for 10 min. This dehydration process was carried out twice. The gel slices were dried by placing the tubes in a centrifugal evaporator. Next, 30  $\mu$ L of trypsin solution containing 10  $\mu$ g/mL of trypsin and 50 mM ammonium hydrogen carbonate was added, and the tubes were stored on ice for 30 min. The solution was removed, and the tubes were incubated at 37°C overnight (12 to 16 h), after which 50% acetonitrile and 5% trifluoroacetic acid was added to each tube and shaken for 30 min in order to extract proteins from the gel slices. After the protein-containing solution was removed, 25  $\mu$ L of 50% acetonitrile and 5% trifluoroacetic acid was added to the gel slices, and proteins were extracted again using the same procedure. The protein solution was dried by evaporation using a centrifugal evaporator, and 13  $\mu$ L of 0.1% formic acid was added. After shaking for 5 min, 10  $\mu$ L of the sample was used for analysis. The samples were stored at 4°C until they were analyzed.

Table S1

| 1st Experiment (Supernatant Fraction) |                                                                                                                                                   | Coverage | MW [kDa] | Control  | GloNAo   | GloN     | (GloNAo)2 | (GloN)2  | GloNAo-GloN |
|---------------------------------------|---------------------------------------------------------------------------------------------------------------------------------------------------|----------|----------|----------|----------|----------|-----------|----------|-------------|
| Accession                             | Description                                                                                                                                       |          |          |          |          |          |           |          |             |
| A7UEM1                                | Transhydrogenase alpha subunit (Fragment) OS=Vibrio parahaemolyticus GN=pntA PE=4 SV=1                                                            | 19.6     | 15.5     | 4.70E+06 | 5.30E+06 | 2.20E+06 | 7.30E+06  | 5.00E+06 | 7.20E+06    |
| A7UEQ6                                | Dihydro-oxotase (Fragment) OS=Vibrio parahaemolyticus GN=pyrC PE=3 SV=1                                                                           | 9.8      | 17.8     |          |          |          |           |          | 2.60E+06    |
| H65AH9                                | Thermolabile hemolysin (Fragment) OS=Vibrio parahaemolyticus GN=tl PE=4 SV=1                                                                      | 10.8     | 13.6     |          |          |          |           |          | 4.00E+07    |
| Q50286                                | Dihydropyridyl dehydrogenase OS=Vibrio parahaemolyticus serotype O3:K6 (strain RIMD 2210633) GN=lpd PE=3 SV=2                                     | 48.0     | 51.0     | 1.40E+07 | 2.60E+07 | 1.60E+07 | 2.20E+07  | 3.90E+07 | 3.40E+07    |
| O87081                                | Polar flagellin F OS=Vibrio parahaemolyticus serotype O3:K6 (strain RIMD 2210633) GN=flaF PE=3 SV=2                                               | 5.6      | 40.5     |          | 1.30E+07 |          | 2.00E+07  | 2.00E+07 | 2.10E+07    |
| POA481                                | 50S ribosomal protein L20 OS=Vibrio parahaemolyticus serotype O3:K6 (strain RIMD 2210633) GN=rrL PE=3 SV=1                                        | 8.5      | 13.4     |          |          |          |           |          | 5.10E+06    |
| P19250                                | Thermostable direct hemolysin 2 OS=Vibrio parahaemolyticus serotype O3:K6 (strain RIMD 2210633) GN=tdh2 PE=1 SV=2                                 | 18.5     | 21.5     | 1.00E+07 | 1.80E+07 | 1.60E+07 | 1.50E+07  | 2.60E+07 | 2.20E+07    |
| P22099                                | Anthraxin-like synthase component 1 OS=Vibrio parahaemolyticus serotype O3:K6 (strain RIMD 2210633) GN=trpE PE=3 SV=2                             | 3.9      | 59.7     | 1.90E+06 | 3.60E+06 | 2.00E+06 | 4.80E+06  | 2.70E+06 | 3.50E+06    |
| P22848                                | 5'-nucleotidase OS=Vibrio parahaemolyticus serotype O3:K6 (strain RIMD 2210633) GN=nta PE=3 SV=2                                                  | 2.1      | 62.1     |          |          |          |           |          | 4.10E+06    |
| P40611                                | Ribonuclease R OS=Vibrio parahaemolyticus serotype O3:K6 (strain RIMD 2210633) GN=rnr PE=3 SV=2                                                   | 3.5      | 95.0     |          |          | 2.20E+06 |           | 3.80E+06 | 3.40E+06    |
| P59494                                | Maltoporin OS=Vibrio parahaemolyticus serotype O3:K6 (strain RIMD 2210633) GN=lamB PE=3 SV=1                                                      | 63.9     | 46.9     | 2.40E+08 | 3.00E+08 | 2.30E+08 | 2.80E+08  | 4.10E+08 | 3.70E+08    |
| P59570                                | Outer membrane protein OmpK OS=Vibrio parahaemolyticus serotype O3:K6 (strain RIMD 2210633) GN=ompK PE=3 SV=1                                     | 25.6     | 29.9     | 9.10E+06 | 1.40E+07 | 1.10E+07 | 1.70E+07  | 1.80E+07 | 1.70E+07    |
| P59605                                | Argininosuccinate synthase OS=Vibrio parahaemolyticus serotype O3:K6 (strain RIMD 2210633) GN=argG PE=3 SV=1                                      | 40.6     | 44.5     | 2.20E+07 | 3.10E+07 | 2.30E+07 | 3.60E+07  | 6.00E+07 | 4.80E+07    |
| P59620                                | Bifunctional protein ArgH OS=Vibrio parahaemolyticus serotype O3:K6 (strain RIMD 2210633) GN=argH PE=3 SV=1                                       | 10.7     | 69.3     | 5.10E+06 | 4.80E+06 | 4.40E+06 | 7.40E+06  | 8.50E+06 | 9.50E+06    |
| PE6478                                | 30S ribosomal protein S18 OS=Vibrio parahaemolyticus serotype O3:K6 (strain RIMD 2210633) GN=rsr PE=3 SV=1                                        | 10.7     | 8.8      |          |          |          |           |          | 3.00E+06    |
| P74596                                | Lon protease OS=Vibrio parahaemolyticus serotype O3:K6 (strain RIMD 2210633) GN=lon PE=3 SV=2                                                     | 1.3      | 87.8     |          |          |          |           |          | 3.60E+06    |
| Q56702                                | Polar flagellin B/D OS=Vibrio parahaemolyticus serotype O3:K6 (strain RIMD 2210633) GN=flaB PE=3 SV=2                                             | 54.0     | 40.1     | 8.20E+06 | 1.90E+07 | 1.10E+07 | 2.40E+07  | 2.30E+07 | 2.60E+07    |
| Q56710                                | Polar flagellin A OS=Vibrio parahaemolyticus serotype O3:K6 (strain RIMD 2210633) GN=flaA PE=3 SV=1                                               | 28.2     | 39.8     |          | 4.00E+06 | 6.00E+06 | 1.50E+07  | 1.40E+07 | 1.50E+07    |
| Q56712                                | Polar flagellin C OS=Vibrio parahaemolyticus serotype O3:K6 (strain RIMD 2210633) GN=flaC PE=3 SV=2                                               | 27.3     | 40.8     | 2.50E+06 | 1.10E+07 | 5.40E+06 | 1.60E+07  | 1.80E+07 | 1.70E+07    |
| Q79YX4                                | Chemotaxis protein CheW OS=Vibrio parahaemolyticus serotype O3:K6 (strain RIMD 2210633) GN=VP2225 PE=4 SV=1                                       | 15.2     | 18.4     |          | 2.80E+06 | 2.30E+06 |           | 4.00E+06 | 4.20E+06    |
| Q79YV9                                | Polar flagellar FlgE OS=Vibrio parahaemolyticus serotype O3:K6 (strain RIMD 2210633) GN=VP0778 PE=4 SV=1                                          | 14.9     | 47.3     | 1.40E+06 | 6.90E+06 | 5.20E+06 | 9.90E+06  | 7.40E+06 | 1.10E+07    |
| Q877T5                                | Elongation factor Tu OS=Vibrio parahaemolyticus serotype O3:K6 (strain RIMD 2210633) GN=ufuA PE=3 SV=1                                            | 60.2     | 43.1     | 7.70E+07 | 1.70E+08 | 7.90E+07 | 1.50E+08  | 2.70E+08 | 2.40E+08    |
| Q877L7                                | Putative diaminopimelate decarboxylase protein OS=Vibrio parahaemolyticus serotype O3:K6 (strain RIMD 2210633) GN=VPA1662 PE=3 SV=1               | 9.8      | 45.3     | 3.50E+06 | 3.70E+06 | 3.00E+06 | 2.30E+06  | 4.40E+06 | 3.80E+06    |
| Q87FM0                                | Uncharacterized protein OS=Vibrio parahaemolyticus serotype O3:K6 (strain RIMD 2210633) GN=VPA1659 PE=4 SV=1                                      | 57.9     | 68.7     | 4.70E+07 | 8.00E+07 | 6.20E+07 | 6.80E+07  | 1.30E+08 | 1.30E+08    |
| Q87FM1                                | Uncharacterized protein OS=Vibrio parahaemolyticus serotype O3:K6 (strain RIMD 2210633) GN=VPA1658 PE=4 SV=1                                      | 17.9     | 44.2     | 5.20E+06 | 8.90E+06 | 5.20E+06 | 9.30E+06  | 1.40E+07 | 1.10E+07    |
| Q87FM2                                | Ferric siderophore receptor homolog OS=Vibrio parahaemolyticus serotype O3:K6 (strain RIMD 2210633) GN=VPA1657 PE=3 SV=1                          | 57.5     | 74.9     | 6.30E+07 | 1.10E+08 | 8.30E+07 | 1.00E+08  | 1.30E+08 | 1.10E+08    |
| Q87FM3                                | Ferric vibrioferrin receptor OS=Vibrio parahaemolyticus serotype O3:K6 (strain RIMD 2210633) GN=VPA1656 PE=3 SV=1                                 | 35.0     | 78.8     | 4.40E+07 | 7.20E+07 | 6.10E+07 | 7.50E+07  | 8.80E+07 | 8.90E+07    |
| Q87FM9                                | Ferrous zinc protease, insulinsase family OS=Vibrio parahaemolyticus serotype O3:K6 (strain RIMD 2210633) GN=VPA1650 PE=3 SV=1                    | 10.9     | 102.2    | 4.30E+06 | 4.80E+06 | 3.20E+06 | 5.10E+06  | 8.80E+06 | 7.10E+06    |
| Q87FN1                                | Uncharacterized protein OS=Vibrio parahaemolyticus serotype O3:K6 (strain RIMD 2210633) GN=VPA1648 PE=4 SV=1                                      | 3.3      | 62.7     |          | 2.50E+06 | 1.30E+06 | 2.30E+06  | 4.10E+06 |             |
| Q87FN4                                | Glucogen operon protein GlgX homolog OS=Vibrio parahaemolyticus serotype O3:K6 (strain RIMD 2210633) GN=VPA1645 PE=4 SV=1                         | 1.4      | 75.9     | 3.40E+06 | 4.20E+06 | 3.20E+06 |           | 7.50E+06 | 6.40E+06    |
| Q87FN5                                | Putative maltose operon periplasmic protein OS=Vibrio parahaemolyticus serotype O3:K6 (strain RIMD 2210633) GN=VPA1643 PE=4 SV=1                  | 9.3      | 29.1     | 3.70E+06 | 6.00E+06 | 3.60E+06 | 3.90E+06  | 9.70E+06 | 7.90E+06    |
| Q87FP0                                | Putative pullulanase OS=Vibrio parahaemolyticus serotype O3:K6 (strain RIMD 2210633) GN=VPA1638 PE=4 SV=1                                         | 35.8     | 144.5    | 1.90E+07 | 3.10E+07 | 1.40E+07 | 1.90E+07  | 1.80E+07 | 1.70E+07    |
| Q87FQ8                                | Alpha-1,4 glucan phosphorylase OS=Vibrio parahaemolyticus serotype O3:K6 (strain RIMD 2210633) GN=VPA1620 PE=3 SV=1                               | 34.4     | 92.3     | 2.10E+07 | 2.80E+07 | 2.10E+07 | 2.80E+07  | 5.00E+07 | 4.80E+07    |
| Q87FG9                                | 4-alpha-glucanotransferase OS=Vibrio parahaemolyticus serotype O3:K6 (strain RIMD 2210633) GN=VPA1619 PE=3 SV=1                                   | 47.8     | 81.8     | 1.70E+07 | 2.30E+07 | 2.00E+07 | 2.40E+07  | 4.00E+07 | 3.40E+07    |
| Q87FR0                                | 1,4-alpha-glucan branching enzyme GlgB OS=Vibrio parahaemolyticus serotype O3:K6 (strain RIMD 2210633) GN=glgB PE=3 SV=1                          | 2.0      | 87.4     | 1.30E+06 | 1.30E+06 |          | 2.70E+06  | 2.10E+06 |             |
| Q87FR2                                | Alpha-amylase OS=Vibrio parahaemolyticus serotype O3:K6 (strain RIMD 2210633) GN=VPA1616 PE=4 SV=1                                                | 1.2      | 76.9     |          |          |          |           | 5.90E+06 | 3.60E+06    |
| Q87FR7                                | Putative carboxypeptidase G2 OS=Vibrio parahaemolyticus serotype O3:K6 (strain RIMD 2210633) GN=VPA1611 PE=4 SV=1                                 | 5.1      | 40.4     |          |          |          |           |          |             |
| Q87FT0                                | GloNAc-binding protein A OS=Vibrio parahaemolyticus serotype O3:K6 (strain RIMD 2210633) GN=ggpA PE=3 SV=1                                        | 51.1     | 53.6     | 1.20E+07 | 3.60E+07 | 4.30E+07 | 3.50E+07  | 8.70E+07 | 1.00E+08    |
| Q87FX6                                | Flagellar biosynthetic protein flrR OS=Vibrio parahaemolyticus serotype O3:K6 (strain RIMD 2210633) GN=VPA1544 PE=3 SV=1                          | 8.1      | 27.9     |          | 9.20E+06 |          |           |          |             |
| Q87G07                                | ScrA (Aminotransferase) OS=Vibrio parahaemolyticus serotype O3:K6 (strain RIMD 2210633) GN=VPA1513 PE=3 SV=1                                      | 40.6     | 52.8     | 1.90E+07 | 3.00E+07 | 3.00E+07 | 4.70E+07  | 5.10E+07 | 6.80E+07    |
| Q87G09                                | 2-amino-3-ketobutyrate coenzyme A ligase OS=Vibrio parahaemolyticus serotype O3:K6 (strain RIMD 2210633) GN=kbl PE=3 SV=1                         | 5.3      | 43.1     | 1.80E+06 | 3.20E+06 | 2.90E+06 | 3.10E+06  |          | 5.40E+06    |
| Q87G18                                | L-lactate dehydrogenase OS=Vibrio parahaemolyticus serotype O3:K6 (strain RIMD 2210633) GN=ldh PE=3 SV=1                                          | 8.4      | 41.4     | 4.50E+06 | 3.30E+06 |          |           | 6.90E+06 |             |
| Q87G21                                | Prolyl endopeptidase OS=Vibrio parahaemolyticus serotype O3:K6 (strain RIMD 2210633) GN=VPA1496 PE=4 SV=1                                         | 31.3     | 76.0     | 7.10E+06 | 1.10E+07 | 8.80E+06 | 1.30E+07  | 1.80E+07 | 1.40E+07    |
| Q87G42                                | Purine nucleoside phosphorylase DeoD-type 2 OS=Vibrio parahaemolyticus serotype O3:K6 (strain RIMD 2210633) GN=deoD2 PE=3 SV=1                    | 13.1     | 25.7     |          | 5.40E+06 | 3.80E+06 | 6.20E+06  | 9.60E+06 | 1.20E+07    |
| Q87G48                                | Outer membrane lipoprotein OS=Vibrio parahaemolyticus serotype O3:K6 (strain RIMD 2210633) GN=VPA1469 PE=4 SV=1                                   | 57.1     | 8.7      | 6.00E+06 | 1.80E+07 | 5.30E+06 | 1.10E+07  | 1.30E+07 | 1.50E+07    |
| Q87G50                                | Protease II OS=Vibrio parahaemolyticus serotype O3:K6 (strain RIMD 2210633) GN=VPA1467 PE=4 SV=1                                                  | 16.8     | 75.1     |          | 3.30E+06 | 4.80E+06 | 4.80E+06  | 8.00E+06 | 1.30E+07    |
| Q87G52                                | Uncharacterized protein OS=Vibrio parahaemolyticus serotype O3:K6 (strain RIMD 2210633) GN=VPA1465 PE=4 SV=1                                      | 17.2     | 84.5     | 3.30E+06 | 6.90E+06 | 6.80E+06 | 9.50E+06  | 1.00E+07 | 1.40E+07    |
| Q87G82                                | Putative iron(III) compound receptor OS=Vibrio parahaemolyticus serotype O3:K6 (strain RIMD 2210633) GN=VPA1435 PE=3 SV=1                         | 2.9      | 77.0     | 1.90E+06 | 3.40E+06 |          | 3.30E+06  |          |             |
| Q87G89                                | Azurin OS=Vibrio parahaemolyticus serotype O3:K6 (strain RIMD 2210633) GN=VPA1428 PE=4 SV=1                                                       | 28.0     | 15.8     | 1.80E+07 | 2.40E+07 | 1.50E+07 | 2.40E+07  | 2.90E+07 | 3.10E+07    |
| Q87G86                                | Maltase ABC transporter, periplasmic maltose-binding protein OS=Vibrio parahaemolyticus serotype O3:K6 (strain RIMD 2210633) GN=VPA1401 PE=4 SV=1 | 71.4     | 42.1     | 4.70E+07 | 7.60E+07 | 5.40E+07 | 8.20E+07  | 1.50E+08 | 1.20E+08    |
| Q87K7                                 | Uncharacterized protein OS=Vibrio parahaemolyticus serotype O3:K6 (strain RIMD 2210633) GN=VPA1308 PE=4 SV=1                                      | 39.7     | 42.3     | 2.00E+07 | 4.00E+07 | 2.40E+07 | 3.80E+07  | 4.80E+07 | 5.10E+07    |
| Q87G1W1                               | Acetyl-CoA acetyltransferase OS=Vibrio parahaemolyticus serotype O3:K6 (strain RIMD 2210633) GN=VPA1204 PE=3 SV=1                                 | 3.2      | 41.5     |          |          |          |           | 9.00E+06 | 5.60E+06    |
| Q87G1W6                               | Periplasmic nitrate reductase OS=Vibrio parahaemolyticus serotype O3:K6 (strain RIMD 2210633) GN=narX PE=3 SV=1                                   | 1.7      | 92.9     |          | 2.80E+06 | 2.90E+06 | 4.40E+06  | 5.00E+06 | 3.50E+06    |
| Q87G1X9                               | Outer membrane protein OmpA OS=Vibrio parahaemolyticus serotype O3:K6 (strain RIMD 2210633) GN=VPA1186 PE=3 SV=1                                  | 4.3      | 36.0     |          |          |          |           |          | 1.90E+06    |
| Q87G1Y4                               | Transketolase 2 OS=Vibrio parahaemolyticus serotype O3:K6 (strain RIMD 2210633) GN=txk2 PE=3 SV=1                                                 | 5.7      | 72.0     | 5.30E+06 | 7.60E+06 | 3.10E+06 | 6.30E+06  | 9.50E+06 | 5.70E+06    |
| Q87G1Y5                               | Transaldolase OS=Vibrio parahaemolyticus serotype O3:K6 (strain RIMD 2210633) GN=tal PE=3 SV=1                                                    | 62.0     | 34.8     | 1.30E+07 | 1.90E+07 | 1.60E+07 | 2.50E+07  | 3.40E+07 | 3.80E+07    |
| Q87G1Y8                               | Putative chitinase A OS=Vibrio parahaemolyticus serotype O3:K6 (strain RIMD 2210633) GN=VPA1177 PE=3 SV=1                                         | 2.8      | 47.9     |          |          |          |           |          | 1.70E+06    |
| Q87H02                                | Oxidoreductase, aldo/keto reductase 2 family OS=Vibrio parahaemolyticus serotype O3:K6 (strain RIMD 2210633) GN=VPA1163 PE=4 SV=1                 | 7.3      | 34.0     |          | 2.80E+06 |          |           | 4.10E+06 |             |
| Q87H16                                | Uncharacterized protein OS=Vibrio parahaemolyticus serotype O3:K6 (strain RIMD 2210633) GN=VPA1149 PE=4 SV=1                                      | 4.6      | 45.3     |          | 4.10E+06 |          |           |          | 7.10E+06    |
| Q87H14                                | L-allo-threonine aldolase OS=Vibrio parahaemolyticus serotype O3:K6 (strain RIMD 2210633) GN=VPA1011 PE=4 SV=1                                    | 25.1     | 36.1     | 4.80E+06 | 1.40E+07 | 1.20E+07 | 1.50E+07  | 2.20E+07 | 1.80E+07    |
| Q87H10                                | D-lactate dehydrogenase OS=Vibrio parahaemolyticus serotype O3:K6 (strain RIMD 2210633) GN=VPA1005 PE=4 SV=1                                      | 8.5      | 64.3     | 5.20E+06 | 2.70E+06 |          | 5.80E+06  | 9.40E+06 | 5.90E+06    |
| Q87H16                                | Alpha-amylase OS=Vibrio parahaemolyticus serotype O3:K6 (strain RIMD 2210633) GN=VPA0999 PE=4 SV=1                                                | 14.6     | 58.4     | 1.20E+06 | 1.20E+07 | 1.40E+06 | 1.10E+07  | 3.00E+06 | 2.60E+06    |
| Q87H14                                | Ferric aerobactin receptor OS=Vibrio parahaemolyticus serotype O3:K6 (strain RIMD 2210633) GN=VPA0979 PE=3 SV=1                                   | 39.4     | 79.2     | 2.50E+07 | 4.30E+07 | 3.30E+07 | 3.40E+07  | 4.60E+07 | 4.50E+07    |
| Q87H10                                | Putative biofilm-associated surface protein OS=Vibrio parahaemolyticus serotype O3:K6 (strain RIMD 2210633) GN=VPA0953 PE=4 SV=1                  | 0.4      | 247.1    |          | 2.30E+06 |          |           | 3.90E+06 |             |
| Q87HM7                                | Amino acid biosynthesis aminotransferase OS=Vibrio parahaemolyticus serotype O3:K6 (strain RIMD 2210633) GN=VPA0936 PE=4 SV=1                     | 30.7     | 43.7     | 7.00E+06 | 9.50E+06 | 8.10E+06 | 1.30E+07  | 1.40E+07 | 1.70E+07    |
| Q87HM8                                | Uncharacterized protein OS=Vibrio parahaemolyticus serotype O3:K6 (strain RIMD 2210633) GN=VPA0935 PE=4 SV=1                                      | 4.8      | 25.7     |          |          |          | 1.00E+06  | 1.30E+06 | 1.90E+06    |
| Q87HP1                                | NAD(P) transhydrogenase subunit alpha OS=Vibrio parahaemolyticus serotype O3:K6 (strain RIMD 2210633) GN=VPA0922 PE=3 SV=1                        | 24.3     | 54.8     | 6.30E+06 | 1.10E+07 | 2.20E+06 | 1.40E+07  | 1.60E+07 | 1.00E+07    |
| Q87HP2                                | NAD(P) transhydrogenase subunit beta OS=Vibrio parahaemolyticus serotype O3:K6 (strain RIMD 2210633) GN=VPA0921 PE=3 SV=1                         | 4.6      | 48.6     | 5.30E+06 | 6.40E+06 |          | 6.20E+06  | 1.30E+07 | 2.10E+06    |
| Q87H54                                | Heme transport protein HtaA OS=Vibrio parahaemolyticus serotype O3:K6 (strain RIMD 2210633) GN=VPA0882 PE=3 SV=1                                  | 55.6     | 77.3     | 5.20E+07 | 8.90E+07 | 6.10E+07 | 7.40E+07  | 8.40E+07 | 7.60E+07    |
| Q87HV6                                | UPF0312 protein VPA0850 OS=Vibrio parahaemolyticus serotype O3:K6 (strain RIMD 2210633) GN=VPA0850 PE=3 SV=1                                      | 25.9     | 20.3     | 6.90E+06 | 9.90E+06 | 8.00E+06 | 1.10E+07  | 1.10E+07 | 6.80E+06    |
| Q87H44                                | Chitoextrinase OS=Vibrio parahaemolyticus serotype O3:K6 (strain RIMD 2210633) GN=VPA0832 PE=4 SV=1                                               | 41.7     | 111.8    |          |          | 1.30E+07 | 9.40E+06  | 8.30E+07 | 1.70E+08    |
| Q87J01                                | Aminomethyltransferase OS=Vibrio parahaemolyticus serotype O3:K6 (strain RIMD 2210633) GN=VPA0805 PE=3 SV=1                                       | 7.5      | 40.3     |          | 3.30E+06 |          | 3.10E+06  | 1.10E+07 | 7.90E+06    |
| Q87J05                                | Glycine dehydrogenase (decarboxylating) OS=Vibrio parahaemolyticus serotype O3:K6 (strain RIMD 2210633) GN=ggvP PE=3 SV=1                         | 15.6     | 104.1    | 7.90E+06 | 1.20E+07 | 6.70E+06 | 1.10E+0   |          |             |

Table S1

|        |                                                                                                                                                         |      |       |          |          |          |          |          |          |
|--------|---------------------------------------------------------------------------------------------------------------------------------------------------------|------|-------|----------|----------|----------|----------|----------|----------|
| Q87KB7 | Branched-chain amino acid amidotransferase OS=Vibrio parahaemolyticus serotype O3K6 (strain RIMD 2210633) GN=VP3060 PE=3 SV=1                           | 16.7 | 34.3  | 4.80E+06 | 9.20E+06 | 6.80E+06 | 1.10E+07 | 1.80E+07 | 2.00E+07 |
| Q87KE1 | N5-carboxyaminoimidazole ribonucleotide mutase OS=Vibrio parahaemolyticus serotype O3K6 (strain RIMD 2210633) GN=purE PE=3 SV=1                         | 8.1  | 16.6  |          |          |          |          |          |          |
| Q87K76 | Phosphomethylpyrimidine synthase OS=Vibrio parahaemolyticus serotype O3K6 (strain RIMD 2210633) GN=thiC PE=3 SV=1                                       | 17.6 | 72.4  | 4.50E+06 | 5.60E+06 | 5.60E+06 | 5.50E+06 | 1.10E+07 | 7.30E+06 |
| Q87K76 | Aminopeptidase P OS=Vibrio parahaemolyticus serotype O3K6 (strain RIMD 2210633) GN=VP3021 PE=4 SV=1                                                     | 22.0 | 65.5  | 8.00E+06 | 7.10E+06 | 5.60E+06 | 8.50E+06 | 1.50E+07 | 1.50E+07 |
| Q87KG4 | DNA helicase OS=Vibrio parahaemolyticus serotype O3K6 (strain RIMD 2210633) GN=VP3013 PE=4 SV=1                                                         | 0.8  | 82.4  | 5.30E+05 | 9.20E+05 |          |          |          |          |
| Q87KJ7 | Putative uroporphyrin-III C-methyltransferase OS=Vibrio parahaemolyticus serotype O3K6 (strain RIMD 2210633) GN=VP2990 PE=4 SV=1                        | 2.5  | 45.1  |          |          |          | 2.30E+06 |          |          |
| Q87KJ9 | Porphobilinogen deaminase OS=Vibrio parahaemolyticus serotype O3K6 (strain RIMD 2210633) GN=hemC PE=3 SV=1                                              | 3.5  | 34.1  |          | 2.00E+06 |          |          | 5.60E+06 |          |
| Q87KJ3 | Diaminopimelate decarboxylase OS=Vibrio parahaemolyticus serotype O3K6 (strain RIMD 2210633) GN=lysA PE=3 SV=1                                          | 18.2 | 45.9  | 2.90E+06 | 5.90E+06 | 4.80E+06 | 6.80E+06 | 8.80E+06 | 8.20E+06 |
| Q87KQ1 | 50S ribosomal protein L1 OS=Vibrio parahaemolyticus serotype O3K6 (strain RIMD 2210633) GN=rplA PE=3 SV=1                                               | 10.3 | 24.7  |          | 3.70E+06 |          | 5.30E+06 | 7.60E+06 | 6.50E+06 |
| Q87KQ4 | DNA-directed RNA polymerase subunit beta OS=Vibrio parahaemolyticus serotype O3K6 (strain RIMD 2210633) GN=rpoB PE=3 SV=1                               | 27.3 | 149.5 | 1.20E+07 | 1.10E+07 | 7.20E+06 | 1.60E+07 | 1.80E+07 | 1.80E+07 |
| Q87KQ5 | DNA-directed RNA polymerase subunit beta' OS=Vibrio parahaemolyticus serotype O3K6 (strain RIMD 2210633) GN=rpoC PE=3 SV=1                              | 29.6 | 154.8 | 1.20E+07 | 1.60E+07 | 6.90E+06 | 1.70E+07 | 2.00E+07 | 2.00E+07 |
| Q87KR5 | DNA-binding protein HU-2 OS=Vibrio parahaemolyticus serotype O3K6 (strain RIMD 2210633) GN=VP2911 PE=3 SV=1                                             | 63.7 | 9.6   |          | 3.80E+06 |          | 5.10E+06 | 1.10E+07 | 1.00E+07 |
| Q87KT0 | Bifunctional purine biosynthesis protein PurH OS=Vibrio parahaemolyticus serotype O3K6 (strain RIMD 2210633) GN=purH PE=3 SV=1                          | 31.9 | 57.3  | 4.50E+06 | 8.50E+06 | 5.50E+06 | 9.70E+06 | 1.90E+07 | 1.00E+07 |
| Q87KU4 | Acetyl-CoA carboxylase, biotin carboxylase OS=Vibrio parahaemolyticus serotype O3K6 (strain RIMD 2210633) GN=VP2881 PE=4 SV=1                           | 3.6  | 49.2  | 1.60E+06 |          |          | 4.00E+06 | 6.40E+06 | 3.10E+06 |
| Q87KU7 | Acetyl-coenzyme A synthetase OS=Vibrio parahaemolyticus serotype O3K6 (strain RIMD 2210633) GN=accA PE=3 SV=1                                           | 9.5  | 71.7  | 4.40E+06 | 4.40E+06 | 2.40E+06 | 3.30E+06 | 6.10E+06 | 5.80E+06 |
| Q87KV2 | Fumarate hydratase class II OS=Vibrio parahaemolyticus serotype O3K6 (strain RIMD 2210633) GN=fumC PE=3 SV=1                                            | 31.0 | 48.7  | 3.60E+07 | 5.50E+07 | 3.60E+07 | 5.80E+07 | 8.70E+07 | 8.30E+07 |
| Q87KW2 | Aspartate ammonia-lyase OS=Vibrio parahaemolyticus serotype O3K6 (strain RIMD 2210633) GN=VP2863 PE=3 SV=1                                              | 20.7 | 52.7  | 6.20E+06 | 1.00E+07 | 9.10E+06 | 1.20E+07 | 1.60E+07 | 1.90E+07 |
| Q87KW5 | Superoxide dismutase OS=Vibrio parahaemolyticus serotype O3K6 (strain RIMD 2210633) GN=VP2860 PE=3 SV=1                                                 | 19.3 | 23.0  | 6.20E+06 | 7.00E+06 | 5.20E+06 | 1.10E+07 | 1.50E+07 | 1.30E+07 |
| Q87KX0 | ATP-dependent 6-phosphofructokinase OS=Vibrio parahaemolyticus serotype O3K6 (strain RIMD 2210633) GN=prkA PE=3 SV=1                                    | 3.4  | 34.6  |          |          |          |          |          |          |
| Q87KX3 | Protein-export protein SecB OS=Vibrio parahaemolyticus serotype O3K6 (strain RIMD 2210633) GN=secB PE=3 SV=1                                            | 7.8  | 17.2  |          | 1.70E+06 |          |          | 4.30E+06 |          |
| Q87KZ5 | 2,3-bisphosphoglycerate-independent phosphoglycerate mutase OS=Vibrio parahaemolyticus serotype O3K6 (strain RIMD 2210633) GN=gpmI PE=3 SV=1            | 21.0 | 55.1  | 4.90E+06 | 6.50E+06 | 5.50E+06 | 1.20E+07 | 2.00E+07 | 1.40E+07 |
| Q87L07 | RNA-binding protein Hfq OS=Vibrio parahaemolyticus serotype O3K6 (strain RIMD 2210633) GN=hfq PE=3 SV=1                                                 | 25.3 | 9.8   |          | 4.90E+06 |          | 6.90E+06 | 6.80E+06 | 8.00E+06 |
| Q87L13 | Tryptophan-tRNA ligase OS=Vibrio parahaemolyticus serotype O3K6 (strain RIMD 2210633) GN=trpS PE=3 SV=1                                                 | 6.8  | 37.6  |          |          | 1.80E+06 | 2.70E+06 | 3.00E+06 | 4.80E+06 |
| Q87L18 | Extracellular nuclease-related protein OS=Vibrio parahaemolyticus serotype O3K6 (strain RIMD 2210633) GN=VP2799 PE=4 SV=1                               | 3.8  | 105.9 |          | 5.30E+06 | 2.50E+06 | 3.80E+06 | 6.60E+06 | 4.10E+06 |
| Q87L20 | Acetylornithine aminotransferase OS=Vibrio parahaemolyticus serotype O3K6 (strain RIMD 2210633) GN=argD PE=3 SV=1                                       | 33.7 | 43.3  | 3.90E+06 | 1.10E+07 | 1.00E+07 | 1.20E+07 | 1.70E+07 | 1.70E+07 |
| Q87L23 | Uncharacterized protein OS=Vibrio parahaemolyticus serotype O3K6 (strain RIMD 2210633) GN=VP2794 PE=4 SV=1                                              | 12.5 | 29.2  | 1.60E+06 | 4.50E+06 |          | 5.40E+06 |          | 5.50E+06 |
| Q87L38 | Peptidyl-prolyl cis-trans isomerase OS=Vibrio parahaemolyticus serotype O3K6 (strain RIMD 2210633) GN=VP2778 PE=4 SV=1                                  | 11.9 | 28.3  | 1.30E+06 | 1.60E+06 |          | 3.80E+06 | 3.00E+06 | 3.00E+06 |
| Q87L44 | 30S ribosomal protein S7 OS=Vibrio parahaemolyticus serotype O3K6 (strain RIMD 2210633) GN=rpsG PE=3 SV=1                                               | 12.2 | 17.7  |          |          |          | 4.70E+06 | 5.00E+06 |          |
| Q87L45 | Elongation factor G 1 OS=Vibrio parahaemolyticus serotype O3K6 (strain RIMD 2210633) GN=eufA1 PE=3 SV=1                                                 | 20.3 | 77.5  | 4.20E+06 | 8.40E+06 | 7.50E+06 | 1.00E+07 | 1.90E+07 | 1.60E+07 |
| Q87L48 | Putative malate oxidoreductase OS=Vibrio parahaemolyticus serotype O3K6 (strain RIMD 2210633) GN=VP2767 PE=3 SV=1                                       | 11.3 | 46.1  | 3.90E+06 | 5.50E+06 | 5.40E+06 | 6.10E+06 | 9.70E+06 | 9.40E+06 |
| Q87L50 | Cystathionine gamma-synthase OS=Vibrio parahaemolyticus serotype O3K6 (strain RIMD 2210633) GN=VP2765 PE=3 SV=1                                         | 9.6  | 41.8  | 2.90E+06 | 6.10E+06 | 6.60E+06 | 1.20E+07 | 1.20E+07 | 1.60E+07 |
| Q87L54 | Phosphoenolpyruvate carboxylase OS=Vibrio parahaemolyticus serotype O3K6 (strain RIMD 2210633) GN=ppc PE=3 SV=2                                         | 17.2 | 99.2  | 5.10E+06 | 3.80E+06 | 2.30E+06 | 9.90E+06 | 9.40E+06 | 4.30E+06 |
| Q87L55 | N-acetyl-gamma-glutamyl-phosphate reductase OS=Vibrio parahaemolyticus serotype O3K6 (strain RIMD 2210633) GN=argC PE=3 SV=1                            | 18.9 | 36.2  | 5.00E+06 | 5.90E+06 | 5.00E+06 | 6.40E+06 | 8.40E+06 | 1.60E+07 |
| Q87L81 | Glucose-6-phosphate isomerase OS=Vibrio parahaemolyticus serotype O3K6 (strain RIMD 2210633) GN=gpi PE=3 SV=1                                           | 36.7 | 60.9  | 3.20E+07 | 4.90E+07 | 4.40E+07 | 5.00E+07 | 8.00E+07 | 8.40E+07 |
| Q87L90 | Sulfite reductase [NADPH] flavoprotein alpha-component OS=Vibrio parahaemolyticus serotype O3K6 (strain RIMD 2210633) GN=soyJ PE=3 SV=1                 | 19.4 | 68.7  | 7.60E+06 | 9.00E+06 | 5.30E+06 | 7.90E+06 | 1.20E+07 | 1.60E+07 |
| Q87L91 | Sulfite reductase [NADPH] hemoprotein beta'-component OS=Vibrio parahaemolyticus serotype O3K6 (strain RIMD 2210633) GN=soyL PE=3 SV=1                  | 18.2 | 64.8  | 3.10E+06 | 2.00E+07 | 1.60E+07 | 2.20E+07 | 1.50E+07 | 3.80E+07 |
| Q87L98 | Aminotransferase, class V OS=Vibrio parahaemolyticus serotype O3K6 (strain RIMD 2210633) GN=VP2714 PE=3 SV=1                                            | 2.4  | 40.8  | 3.20E+06 |          |          |          |          |          |
| Q87LB4 | Putative Y10 pilin OS=Vibrio parahaemolyticus serotype O3K6 (strain RIMD 2210633) GN=VP2698 PE=4 SV=1                                                   | 18.8 | 16.8  | 5.60E+06 | 6.00E+06 | 2.80E+06 | 7.50E+06 | 1.40E+07 | 9.20E+06 |
| Q87LC0 | Uncharacterized protein OS=Vibrio parahaemolyticus serotype O3K6 (strain RIMD 2210633) GN=VP2692 PE=4 SV=1                                              | 3.4  | 159.1 | 1.80E+06 | 2.80E+06 |          | 7.60E+06 |          | 2.90E+06 |
| Q87LF9 | Omitheine carbamoyltransferase OS=Vibrio parahaemolyticus serotype O3K6 (strain RIMD 2210633) GN=argF PE=3 SV=1                                         | 36.8 | 37.3  | 2.00E+07 | 2.60E+07 | 1.90E+07 | 3.10E+07 | 4.20E+07 | 5.30E+07 |
| Q87LG6 | Valine-tRNA ligase OS=Vibrio parahaemolyticus serotype O3K6 (strain RIMD 2210633) GN=valS PE=3 SV=1                                                     | 12.5 | 108.6 | 3.50E+06 | 9.60E+06 | 4.20E+06 | 1.00E+07 | 1.40E+07 | 1.20E+07 |
| Q87LG8 | Probable cytosol aminopeptidase OS=Vibrio parahaemolyticus serotype O3K6 (strain RIMD 2210633) GN=pepA PE=3 SV=1                                        | 6.6  | 54.4  |          | 6.80E+06 | 2.50E+06 |          | 5.90E+06 | 5.60E+06 |
| Q87LH4 | Deacetylase DA1 OS=Vibrio parahaemolyticus serotype O3K6 (strain RIMD 2210633) GN=VP2638 PE=4 SV=1                                                      | 34.9 | 47.0  | 4.70E+06 | 7.10E+06 | 1.90E+06 | 1.90E+06 | 9.20E+06 | 7.20E+06 |
| Q87LH6 | Permease IIC component OS=Vibrio parahaemolyticus serotype O3K6 (strain RIMD 2210633) GN=VP2636 PE=4 SV=1                                               | 4.3  | 48.7  |          |          |          |          | 9.20E+06 | 7.20E+06 |
| Q87LH8 | 6-phospho-beta-glucosidase OS=Vibrio parahaemolyticus serotype O3K6 (strain RIMD 2210633) GN=VP2634 PE=3 SV=1                                           | 6.1  | 48.3  |          |          |          | 1.20E+07 | 9.00E+06 |          |
| Q87LH8 | Transketolase 1 OS=Vibrio parahaemolyticus serotype O3K6 (strain RIMD 2210633) GN=tkt1 PE=3 SV=1                                                        | 7.2  | 72.0  | 5.30E+06 | 6.60E+06 | 3.10E+06 | 6.00E+06 | 1.00E+07 | 5.70E+06 |
| Q87LL1 | Phosphoglycerate kinase OS=Vibrio parahaemolyticus serotype O3K6 (strain RIMD 2210633) GN=pgk PE=3 SV=1                                                 | 24.1 | 40.7  | 6.20E+06 | 1.10E+07 | 6.20E+06 | 1.30E+07 | 2.20E+07 | 2.00E+07 |
| Q87LL2 | Fructose-bisphosphate aldolase, class II OS=Vibrio parahaemolyticus serotype O3K6 (strain RIMD 2210633) GN=VP2599 PE=4 SV=1                             | 67.6 | 38.9  | 5.80E+07 | 1.00E+08 | 8.00E+07 | 1.10E+08 | 1.60E+08 | 1.60E+08 |
| Q87LL8 | D-3-phosphoglycerate dehydrogenase OS=Vibrio parahaemolyticus serotype O3K6 (strain RIMD 2210633) GN=VP2593 PE=3 SV=1                                   | 23.2 | 44.7  | 3.30E+06 | 7.10E+06 | 4.50E+06 | 1.10E+07 | 1.60E+07 | 9.80E+06 |
| Q87LL9 | Ribose-5-phosphate isomerase A OS=Vibrio parahaemolyticus serotype O3K6 (strain RIMD 2210633) GN=rpiA PE=3 SV=1                                         | 5.5  | 23.2  |          | 4.10E+06 |          | 5.40E+06 | 4.60E+06 |          |
| Q87LM8 | tRNA-modifying protein YgfZ OS=Vibrio parahaemolyticus serotype O3K6 (strain RIMD 2210633) GN=VP2583 PE=3 SV=1                                          | 13.0 | 35.5  | 2.00E+06 | 2.60E+06 | 1.80E+06 | 2.50E+06 | 2.40E+06 | 3.50E+06 |
| Q87LP2 | Pyridoxine 5-phosphate synthase OS=Vibrio parahaemolyticus serotype O3K6 (strain RIMD 2210633) GN=pxdJ PE=3 SV=1                                        | 2.9  | 26.7  |          | 2.00E+06 |          | 3.20E+06 | 3.30E+06 |          |
| Q87LQ0 | Enolase OS=Vibrio parahaemolyticus serotype O3K6 (strain RIMD 2210633) GN=eno PE=3 SV=1                                                                 | 45.7 | 45.5  | 2.50E+07 | 3.90E+07 | 2.50E+07 | 4.30E+07 | 7.00E+07 | 6.40E+07 |
| Q87LR3 | Alanine-tRNA ligase OS=Vibrio parahaemolyticus serotype O3K6 (strain RIMD 2210633) GN=alaS PE=3 SV=1                                                    | 3.4  | 93.9  |          | 2.60E+06 |          |          | 6.40E+06 |          |
| Q87LR7 | Oxaloacetate decarboxylase, alpha subunit OS=Vibrio parahaemolyticus serotype O3K6 (strain RIMD 2210633) GN=VP2544 PE=4 SV=1                            | 5.7  | 64.2  | 3.70E+06 |          |          | 4.60E+06 | 7.70E+06 | 6.00E+06 |
| Q87LS1 | Protease, insulinase family OS=Vibrio parahaemolyticus serotype O3K6 (strain RIMD 2210633) GN=VP2540 PE=3 SV=1                                          | 7.7  | 105.7 | 3.00E+06 | 4.80E+06 | 2.00E+06 | 6.10E+06 | 8.30E+06 | 4.60E+06 |
| Q87LS2 | Glutamate-cysteine ligase OS=Vibrio parahaemolyticus serotype O3K6 (strain RIMD 2210633) GN=gshA PE=3 SV=1                                              | 10.2 | 59.0  | 3.60E+06 | 2.50E+06 | 2.50E+06 | 3.70E+06 | 4.70E+06 | 5.10E+06 |
| Q87LT9 | NadC OS=Vibrio parahaemolyticus serotype O3K6 (strain RIMD 2210633) GN=VP2522 PE=3 SV=1                                                                 | 3.1  | 32.0  |          |          |          |          | 2.10E+06 |          |
| Q87LU2 | Pyruvate dehydrogenase E1 component OS=Vibrio parahaemolyticus serotype O3K6 (strain RIMD 2210633) GN=VP2519 PE=4 SV=1                                  | 45.1 | 99.6  | 3.10E+07 | 4.00E+07 | 3.20E+07 | 5.60E+07 | 7.60E+07 | 6.70E+07 |
| Q87LU3 | Acetyltransferase component of pyruvate dehydrogenase complex OS=Vibrio parahaemolyticus serotype O3K6 (strain RIMD 2210633) GN=VP2518 PE=3 SV=1        | 15.8 | 64.9  | 6.20E+06 | 8.10E+06 | 2.60E+06 | 7.10E+06 | 1.30E+07 | 1.10E+07 |
| Q87LV1 | Pantothenate synthetase OS=Vibrio parahaemolyticus serotype O3K6 (strain RIMD 2210633) GN=panC PE=3 SV=1                                                | 3.0  | 33.4  |          |          |          |          |          |          |
| Q87LW3 | Aconitate hydratase B OS=Vibrio parahaemolyticus serotype O3K6 (strain RIMD 2210633) GN=VP2495 PE=3 SV=1                                                | 31.1 | 94.0  | 1.80E+07 | 2.00E+07 | 1.50E+07 | 2.20E+07 | 4.10E+07 | 2.90E+07 |
| Q87LW7 | Iron(III) ABC transporter, periplasmic iron-compound-binding protein OS=Vibrio parahaemolyticus serotype O3K6 (strain RIMD 2210633) GN=VP2491 PE=4 SV=1 | 55.8 | 37.7  | 4.50E+07 | 8.50E+07 | 7.30E+07 | 9.10E+07 | 1.60E+08 | 1.50E+08 |
| Q87LX0 | Putative phosphoglucomutase/phosphomannomutase OS=Vibrio parahaemolyticus serotype O3K6 (strain RIMD 2210633) GN=VP2488 PE=4 SV=1                       | 15.3 | 52.3  |          |          |          |          |          | 1.40E+07 |
| Q87LX1 | NN'-diacetylchitobiose phosphorylase OS=Vibrio parahaemolyticus serotype O3K6 (strain RIMD 2210633) GN=VP2487 PE=4 SV=1                                 | 32.2 | 90.0  |          |          |          | 1.40E+07 | 2.20E+07 | 6.30E+07 |
| Q87LX2 | Beta-N-hexosaminidase OS=Vibrio parahaemolyticus serotype O3K6 (strain RIMD 2210633) GN=VP2486 PE=4 SV=1                                                | 1.7  | 73.0  |          |          |          |          |          | 7.20E+06 |
| Q87LX9 | Peptide ABC transporter, periplasmic peptide-binding protein OS=Vibrio parahaemolyticus serotype O3K6 (strain RIMD 2210633) GN=VP2479 PE=4 SV=1         | 35.7 | 62.9  |          |          |          | 1.80E+07 | 7.00E+07 | 9.30E+06 |
| Q87LZ1 | Outer membrane protein U OS=Vibrio parahaemolyticus serotype O3K6 (strain RIMD 2210633) GN=ompU PE=3 SV=1                                               | 27.9 | 36.3  | 6.70E+07 | 1.10E+08 | 7.50E+07 | 9.60E+07 | 1.20E+08 | 8.90E+07 |
| Q87LZ5 | ATP-dependent zinc metalloprotease FtsH OS=Vibrio parahaemolyticus serotype O3K6 (strain RIMD 2210633) GN=ftsH PE=3 SV=1                                | 2.7  | 72.9  |          |          |          | 2.60E+06 | 7.60E+05 |          |
| Q87M06 | Polyribonucleotide nucleotidyltransferase OS=Vibrio parahaemolyticus serotype O3K6 (strain RIMD 2210633) GN=ppn PE=3 SV=1                               | 38.8 | 76.7  | 1.30E+07 | 1.90E+07 | 1.50E+07 | 2.10E+07 | 3.10E+07 | 3.20E+07 |
| Q87M18 | Peptide chain release factor 3 OS=Vibrio parahaemolyticus serotype O3K6 (strain RIMD 2210633) GN=prfC PE=3 SV=1                                         | 1.9  | 59.2  |          |          |          |          | 4.20E+06 |          |
| Q87M22 | Deoxyribose-phosphate aldolase OS=Vibrio parahaemolyticus serotype O3K6 (strain RIMD 2210633) GN=deoC PE=3 SV=1                                         | 4.3  | 27.7  | 2.20E+06 | 4.60E+06 | 3.10E+06 | 5.60E+06 | 9.00E+06 | 8.00E+06 |
| Q87M25 | Purine nucleoside phosphorylase DeoD-type 1 OS=Vibrio parahaemolyticus serotype O3K6 (strain RIMD 2210633) GN=deoD1 PE=3 SV=1                           | 14.2 | 25.9  |          |          | 5.00E+06 |          | 8.00E+06 |          |
| Q87M27 | Phosphoserine phosphatase OS=Vibrio parahaemolyticus serotype O3K6 (strain RIMD 2210633) GN=VP2431 PE=4 SV=1                                            | 10.7 | 35.8  |          | 2.00E+06 | 1.30E+06 | 2.90E+06 | 3.90E+06 | 4.10E+06 |
| Q87M30 | Elongation factor G 2 OS=                                                                                                                               |      |       |          |          |          |          |          |          |



Table S1

(3/31)

|         |                                                                                                                                                                                      |      |       |          |          |          |          |          |          |
|---------|--------------------------------------------------------------------------------------------------------------------------------------------------------------------------------------|------|-------|----------|----------|----------|----------|----------|----------|
| Q87NA1  | 5-methyltetrahydropteroylglutamate-homocysteine methyltransferase OS=Vibrio parahaemolyticus serotype O3K6 (strain RIMD 2210633) GN=metE PE=3 SV=1                                   | 42.0 | 84.7  | 2.00E+07 | 2.30E+07 | 1.10E+07 | 3.20E+07 | 4.90E+07 | 2.90E+07 |
| Q87NC6  | Diaminobutyrate-pyruvate transaminase & L-2,4-diaminobutyrate decarboxylase OS=Vibrio parahaemolyticus serotype O3K6 (strain RIMD 2210633) GN=VP1942 PE=1 SV=1                       | 4.2  | 104.3 | 1.50E+06 |          |          | 1.90E+06 | 2.70E+06 | 5.00E+06 |
| Q87NC8  | Carboxynorspermidine/carboxyspermidine decarboxylase OS=Vibrio parahaemolyticus serotype O3K6 (strain RIMD 2210633) GN=VP1940 PE=3 SV=1                                              | 2.1  | 42.0  |          | 1.90E+06 | 1.70E+06 |          |          | 3.80E+06 |
| Q87ND3  | Ribonucleoside-diphosphate reductase, beta subunit OS=Vibrio parahaemolyticus serotype O3K6 (strain RIMD 2210633) GN=VP1935 PE=4 SV=1                                                | 6.6  | 43.7  |          | 5.60E+06 |          |          |          | 6.70E+05 |
| Q87ND6  | DNA gyrase subunit A OS=Vibrio parahaemolyticus serotype O3K6 (strain RIMD 2210633) GN=gyrA PE=3 SV=1                                                                                | 1.7  | 97.0  |          | 1.50E+06 |          | 1.90E+06 | 2.70E+06 | 2.60E+06 |
| Q87NF7  | Extracellular solute-binding protein, family 7 OS=Vibrio parahaemolyticus serotype O3K6 (strain RIMD 2210633) GN=VP1911 PE=3 SV=1                                                    | 8.3  | 41.0  |          | 3.80E+06 |          |          | 3.50E+06 | 5.80E+06 |
| Q87NG8  | Aspartate aminotransferase OS=Vibrio parahaemolyticus serotype O3K6 (strain RIMD 2210633) GN=VP1900 PE=3 SV=1                                                                        | 62.6 | 45.4  | 7.20E+07 | 1.20E+08 | 9.60E+07 | 1.30E+08 | 1.90E+08 | 2.10E+08 |
| Q87NH5  | Asparagine-tRNA ligase OS=Vibrio parahaemolyticus serotype O3K6 (strain RIMD 2210633) GN=asnS PE=3 SV=1                                                                              | 11.2 | 52.6  | 3.80E+06 | 5.10E+06 | 2.70E+06 | 5.10E+06 | 7.30E+06 | 8.10E+06 |
| Q87P08  | Glucose-6-phosphate 1-dehydrogenase OS=Vibrio parahaemolyticus serotype O3K6 (strain RIMD 2210633) GN=zwf PE=3 SV=1                                                                  | 9.0  | 57.6  | 1.50E+06 | 2.80E+06 |          | 6.10E+06 | 7.80E+06 | 5.70E+06 |
| Q87P10  | 6-phosphogluconate dehydrogenase, decarboxylating OS=Vibrio parahaemolyticus serotype O3K6 (strain RIMD 2210633) GN=VP1708 PE=3 SV=1                                                 | 33.8 | 52.5  | 1.20E+07 | 2.80E+07 | 2.00E+07 | 2.90E+07 | 4.00E+07 | 4.30E+07 |
| Q87P32  | Adenosine monophosphate-protein transferase VopS OS=Vibrio parahaemolyticus serotype O3K6 (strain RIMD 2210633) GN=vopS PE=1 SV=1                                                    | 7.5  | 41.7  |          | 2.80E+06 |          |          | 4.70E+06 | 2.90E+06 |
| Q87P59  | Uncharacterized protein OS=Vibrio parahaemolyticus serotype O3K6 (strain RIMD 2210633) GN=VP1659 PE=4 SV=1                                                                           | 4.3  | 67.0  | 2.10E+06 |          | 3.40E+06 |          | 4.30E+06 |          |
| Q87P63  | Immunogenic protein OS=Vibrio parahaemolyticus serotype O3K6 (strain RIMD 2210633) GN=VP1655 PE=4 SV=1                                                                               | 2.8  | 34.9  | 2.50E+07 |          | 3.00E+07 | 3.50E+07 |          | 6.00E+07 |
| Q87P63  | Aminopeptidase N OS=Vibrio parahaemolyticus serotype O3K6 (strain RIMD 2210633) GN=VP1604 PE=4 SV=1                                                                                  | 18.2 | 98.4  | 3.00E+06 | 3.40E+06 | 4.50E+06 | 5.50E+06 | 6.90E+06 | 9.70E+06 |
| Q87P65  | Putative NAD-glutamate dehydrogenase OS=Vibrio parahaemolyticus serotype O3K6 (strain RIMD 2210633) GN=VP1602 PE=4 SV=1                                                              | 5.0  | 183.4 | 4.80E+06 | 8.40E+06 |          | 5.80E+06 | 3.90E+06 | 1.80E+06 |
| Q87P7C3 | Uncharacterized protein OS=Vibrio parahaemolyticus serotype O3K6 (strain RIMD 2210633) GN=VP1594 PE=4 SV=1                                                                           | 34.8 | 64.6  | 3.80E+06 | 1.10E+07 | 8.80E+06 | 1.30E+07 | 1.70E+07 | 1.90E+07 |
| Q87PC5  | 3-hydroxydecanoyl-[acyl-carrier-protein] dehydratase OS=Vibrio parahaemolyticus serotype O3K6 (strain RIMD 2210633) GN=fabA PE=3 SV=1                                                | 16.9 | 19.0  | 7.80E+06 | 1.70E+07 | 1.10E+07 | 1.30E+07 | 2.20E+07 | 2.80E+07 |
| Q87PG1  | Cbb3-type cytochrome c oxidase subunit OS=Vibrio parahaemolyticus serotype O3K6 (strain RIMD 2210633) GN=VP1541 PE=3 SV=1                                                            | 3.1  | 35.4  |          |          |          |          | 1.50E+06 |          |
| Q87PH6  | Putrescine-binding periplasmic protein OS=Vibrio parahaemolyticus serotype O3K6 (strain RIMD 2210633) GN=VP1526 PE=3 SV=1                                                            | 15.5 | 39.7  |          | 4.10E+06 | 3.30E+06 | 7.70E+06 | 1.20E+07 | 1.40E+07 |
| Q87PH7  | Putrescine-binding periplasmic protein OS=Vibrio parahaemolyticus serotype O3K6 (strain RIMD 2210633) GN=VP1525 PE=3 SV=1                                                            | 4.1  | 39.0  |          |          | 3.50E+06 |          |          |          |
| Q87PK2  | Uncharacterized protein OS=Vibrio parahaemolyticus serotype O3K6 (strain RIMD 2210633) GN=VP1501 PE=1 SV=1                                                                           | 9.9  | 30.1  | 3.50E+06 |          | 2.30E+06 |          | 3.80E+06 | 5.00E+06 |
| Q87PP6  | Uncharacterized protein OS=Vibrio parahaemolyticus serotype O3K6 (strain RIMD 2210633) GN=VP1455 PE=4 SV=1                                                                           | 5.3  | 18.0  |          | 8.30E+06 | 3.70E+06 | 6.20E+06 |          |          |
| Q87PV1  | Uncharacterized protein OS=Vibrio parahaemolyticus serotype O3K6 (strain RIMD 2210633) GN=VP1400 PE=4 SV=1                                                                           | 1.9  | 77.2  |          |          |          |          | 5.70E+06 |          |
| Q87Q03  | Oligopeptide ABC transporter, periplasmic oligopeptide-binding protein OS=Vibrio parahaemolyticus serotype O3K6 (strain RIMD 2210633) GN=VP1347 PE=4 SV=1                            | 1.7  | 60.3  | 2.80E+06 |          |          | 6.20E+06 | 5.80E+06 |          |
| Q87Q24  | Uncharacterized protein OS=Vibrio parahaemolyticus serotype O3K6 (strain RIMD 2210633) GN=VP1326 PE=4 SV=1                                                                           | 7.0  | 57.7  | 3.30E+06 | 7.70E+06 | 5.30E+06 | 5.70E+06 | 7.00E+06 | 7.20E+06 |
| Q87Q40  | Succinylglutamate desuccinylase OS=Vibrio parahaemolyticus serotype O3K6 (strain RIMD 2210633) GN=astE PE=1 SV=1                                                                     | 2.6  | 38.8  |          | 2.00E+06 |          |          |          | 4.00E+06 |
| Q87Q42  | Putative oligopeptidase OS=Vibrio parahaemolyticus serotype O3K6 (strain RIMD 2210633) GN=VP1308 PE=4 SV=1                                                                           | 5.5  | 68.0  | 1.90E+06 | 1.10E+06 | 2.00E+06 | 6.10E+05 | 2.60E+06 | 3.80E+06 |
| Q87Q59  | Phenylalanine-tRNA ligase beta subunit OS=Vibrio parahaemolyticus serotype O3K6 (strain RIMD 2210633) GN=pheT PE=3 SV=1                                                              | 2.2  | 87.0  | 5.50E+06 | 5.40E+06 | 3.40E+06 | 5.50E+06 | 8.80E+06 | 7.20E+06 |
| Q87Q70  | Threonine-tRNA ligase OS=Vibrio parahaemolyticus serotype O3K6 (strain RIMD 2210633) GN=thrS PE=3 SV=1                                                                               | 2.5  | 73.7  |          |          |          | 2.60E+06 | 2.60E+06 |          |
| Q87Q87  | Phosphoribosylaminoimidazole-succinocarboxamide synthase OS=Vibrio parahaemolyticus serotype O3K6 (strain RIMD 2210633) GN=purC PE=3 SV=1                                            | 24.5 | 41.0  |          | 3.90E+06 | 2.80E+06 | 5.40E+06 | 1.10E+07 | 1.10E+07 |
| Q87Q99  | Thioredoxin reductase OS=Vibrio parahaemolyticus serotype O3K6 (strain RIMD 2210633) GN=VP1251 PE=3 SV=1                                                                             | 24.5 | 34.5  |          | 9.00E+06 | 6.50E+06 | 5.90E+06 | 1.30E+07 | 1.40E+07 |
| Q87QA3  | Phosphoserine aminotransferase OS=Vibrio parahaemolyticus serotype O3K6 (strain RIMD 2210633) GN=serC PE=3 SV=1                                                                      | 27.7 | 40.2  | 1.00E+07 | 1.70E+07 | 1.30E+07 | 1.80E+07 | 2.70E+07 | 2.10E+07 |
| Q87Q99  | Putative reductase VP1231 OS=Vibrio parahaemolyticus serotype O3K6 (strain RIMD 2210633) GN=VP1231 PE=3 SV=1                                                                         | 43.0 | 43.9  | 1.90E+07 | 2.90E+07 | 2.40E+07 | 3.10E+07 | 4.50E+07 | 4.60E+07 |
| Q87QE2  | UDP-sugar hydrolase OS=Vibrio parahaemolyticus serotype O3K6 (strain RIMD 2210633) GN=VP1207 PE=3 SV=1                                                                               | 2.1  | 61.3  |          |          |          |          | 4.10E+06 |          |
| Q87QE8  | Heat shock protein HslJ OS=Vibrio parahaemolyticus serotype O3K6 (strain RIMD 2210633) GN=VP1203 PE=4 SV=1                                                                           | 6.1  | 16.6  |          |          | 2.00E+06 |          | 4.60E+06 |          |
| Q87QF3  | Putative ABC transporter, periplasmic substrate-binding protein OS=Vibrio parahaemolyticus serotype O3K6 (strain RIMD 2210633) GN=VP1196 PE=4 SV=1                                   | 2.6  | 42.6  |          | 2.00E+06 | 1.50E+06 | 2.20E+06 |          | 3.30E+06 |
| Q87QG7  | Cystathionine beta-lyase OS=Vibrio parahaemolyticus serotype O3K6 (strain RIMD 2210633) GN=VP1182 PE=3 SV=1                                                                          | 3.2  | 44.6  | 2.10E+06 | 4.80E+06 |          | 6.70E+06 | 8.90E+06 | 9.70E+06 |
| Q87QJ9  | Cysteine-tRNA ligase OS=Vibrio parahaemolyticus serotype O3K6 (strain RIMD 2210633) GN=cysS PE=3 SV=1                                                                                | 4.8  | 52.0  |          |          |          |          | 2.80E+06 |          |
| Q87QK9  | Histidine biosynthesis bifunctional protein HsbB OS=Vibrio parahaemolyticus serotype O3K6 (strain RIMD 2210633) GN=hsbB PE=3 SV=1                                                    | 6.2  | 39.8  |          | 3.30E+06 |          | 3.10E+06 | 4.80E+06 |          |
| Q87QL0  | Histidinol-phosphate aminotransferase OS=Vibrio parahaemolyticus serotype O3K6 (strain RIMD 2210633) GN=hisC PE=3 SV=1                                                               | 15.3 | 38.2  | 2.10E+06 | 3.00E+06 | 2.70E+06 | 4.60E+06 | 8.40E+06 | 6.20E+06 |
| Q87QL1  | Histidinol dehydrogenase OS=Vibrio parahaemolyticus serotype O3K6 (strain RIMD 2210633) GN=hisD PE=3 SV=1                                                                            | 15.3 | 46.1  | 4.00E+06 | 5.50E+06 | 8.30E+06 | 4.50E+06 | 1.80E+07 | 1.10E+07 |
| Q87QD2  | ATP phosphoribosyltransferase OS=Vibrio parahaemolyticus serotype O3K6 (strain RIMD 2210633) GN=hisG PE=3 SV=1                                                                       | 40.6 | 32.8  | 6.80E+06 | 7.00E+06 | 7.40E+06 | 9.80E+06 | 1.80E+07 | 2.10E+07 |
| Q87QM1  | Adenylosuccinate lyase OS=Vibrio parahaemolyticus serotype O3K6 (strain RIMD 2210633) GN=VP1128 PE=3 SV=1                                                                            | 28.7 | 51.4  | 7.10E+06 | 1.40E+07 | 1.30E+07 | 1.40E+07 | 1.90E+07 | 2.10E+07 |
| Q87QP1  | Serine-tRNA ligase OS=Vibrio parahaemolyticus serotype O3K6 (strain RIMD 2210633) GN=serS PE=3 SV=1                                                                                  | 16.3 | 48.8  | 3.70E+06 | 4.70E+06 | 5.10E+06 | 5.00E+06 | 1.10E+07 | 1.10E+07 |
| Q87QP6  | Alanine dehydrogenase OS=Vibrio parahaemolyticus serotype O3K6 (strain RIMD 2210633) GN=VP1103 PE=3 SV=1                                                                             | 37.7 | 39.9  | 1.20E+07 | 3.40E+07 | 1.50E+07 | 2.20E+07 | 2.80E+07 | 2.80E+07 |
| Q87Q57  | Putative helicase OS=Vibrio parahaemolyticus serotype O3K6 (strain RIMD 2210633) GN=VP1072 PE=4 SV=1                                                                                 | 16.1 | 68.7  | 1.60E+06 | 2.60E+06 | 2.40E+06 | 4.40E+06 | 7.40E+06 | 6.20E+06 |
| Q87Q78  | Peptidoglycan-associated lipoprotein OS=Vibrio parahaemolyticus serotype O3K6 (strain RIMD 2210633) GN=VP1061 PE=3 SV=1                                                              | 12.6 | 18.7  | 7.90E+06 | 1.00E+07 | 3.80E+06 | 1.00E+07 | 1.40E+07 | 1.10E+07 |
| Q87Q79  | Protein TolB OS=Vibrio parahaemolyticus serotype O3K6 (strain RIMD 2210633) GN=tolB PE=3 SV=1                                                                                        | 17.8 | 48.8  | 2.50E+06 | 5.10E+06 | 4.60E+06 | 7.30E+06 | 4.40E+06 | 8.30E+06 |
| Q87QX5  | Glucogen synthase OS=Vibrio parahaemolyticus serotype O3K6 (strain RIMD 2210633) GN=glgA PE=3 SV=1                                                                                   | 2.1  | 54.0  |          |          |          |          | 3.60E+06 |          |
| Q87QX6  | Glucose-1-phosphate adenylyltransferase 1 OS=Vibrio parahaemolyticus serotype O3K6 (strain RIMD 2210633) GN=glgC1 PE=3 SV=1                                                          | 30.9 | 45.5  | 8.90E+06 | 1.50E+07 | 6.10E+06 | 1.10E+07 | 2.30E+07 | 1.70E+07 |
| Q87QX7  | DNA topoisomerase 1 OS=Vibrio parahaemolyticus serotype O3K6 (strain RIMD 2210633) GN=topA PE=3 SV=1                                                                                 | 1.7  | 98.0  |          |          |          |          |          | 2.80E+06 |
| Q87QX9  | 3-phosphoshikimate 1-carboxyvinyltransferase OS=Vibrio parahaemolyticus serotype O3K6 (strain RIMD 2210633) GN=aroA PE=3 SV=1                                                        | 2.6  | 46.1  |          |          |          |          |          |          |
| Q87QY7  | Isocitrate dehydrogenase OS=Vibrio parahaemolyticus serotype O3K6 (strain RIMD 2210633) GN=VP1011 PE=4 SV=1                                                                          | 65.2 | 80.5  | 4.90E+07 | 6.80E+07 | 5.50E+07 | 6.00E+07 | 1.00E+08 | 8.70E+07 |
| Q87QZ9  | Amino acid ABC transporter, periplasmic amino acid-binding protein OS=Vibrio parahaemolyticus serotype O3K6 (strain RIMD 2210633) GN=VP0999 PE=3 SV=1                                | 45.3 | 28.4  | 4.60E+06 | 9.80E+06 | 7.60E+06 | 1.00E+07 | 2.00E+07 | 2.10E+07 |
| Q87R02  | Putative 54 kDa polar flagellar sheath protein A OS=Vibrio parahaemolyticus serotype O3K6 (strain RIMD 2210633) GN=VP0996 PE=4 SV=1                                                  | 55.8 | 52.3  | 1.50E+07 | 3.20E+07 | 2.50E+07 | 3.20E+07 | 3.00E+07 | 4.40E+07 |
| Q87R04  | Formate acetyltransferase OS=Vibrio parahaemolyticus serotype O3K6 (strain RIMD 2210633) GN=VP0994 PE=4 SV=1                                                                         | 49.1 | 84.5  | 2.60E+07 | 4.80E+07 | 4.10E+07 | 7.30E+07 | 1.20E+08 | 9.60E+07 |
| Q87R36  | Uncharacterized protein OS=Vibrio parahaemolyticus serotype O3K6 (strain RIMD 2210633) GN=VP0962 PE=4 SV=1                                                                           | 24.9 | 43.9  | 2.60E+06 | 5.60E+06 | 3.50E+06 | 7.40E+06 | 1.70E+07 | 1.00E+07 |
| Q87R78  | DNA-binding protein HU-beta OS=Vibrio parahaemolyticus serotype O3K6 (strain RIMD 2210633) GN=VP0920 PE=3 SV=1                                                                       | 12.2 | 9.4   |          |          |          |          |          | 5.10E+06 |
| Q87R80  | ATP-dependent Clp protease proteolytic subunit OS=Vibrio parahaemolyticus serotype O3K6 (strain RIMD 2210633) GN=clpP PE=3 SV=1                                                      | 12.5 | 22.0  | 3.10E+06 | 8.90E+06 | 4.70E+06 |          | 1.80E+07 | 1.80E+07 |
| Q87R87  | O4-dicarboxylate-binding periplasmic protein OS=Vibrio parahaemolyticus serotype O3K6 (strain RIMD 2210633) GN=VP0910 PE=4 SV=1                                                      | 32.2 | 37.1  | 7.20E+06 | 8.20E+06 | 8.50E+06 | 1.40E+07 | 2.10E+07 | 1.60E+07 |
| Q87RD3  | Formyltetrahydrofolate deformylase OS=Vibrio parahaemolyticus serotype O3K6 (strain RIMD 2210633) GN=purU PE=3 SV=1                                                                  | 6.9  | 31.6  |          | 3.10E+06 |          |          |          |          |
| Q87RD6  | Arginine-tRNA ligase OS=Vibrio parahaemolyticus serotype O3K6 (strain RIMD 2210633) GN=argS PE=3 SV=1                                                                                | 32.1 | 63.8  | 5.80E+06 | 9.20E+06 | 9.70E+06 | 1.10E+07 | 1.80E+07 | 2.00E+07 |
| Q87RE4  | Zinc ABC transporter, periplasmic zinc-binding protein OS=Vibrio parahaemolyticus serotype O3K6 (strain RIMD 2210633) GN=VP0853 PE=3 SV=1                                            | 14.4 | 32.1  | 2.90E+06 | 5.70E+06 | 3.50E+06 | 8.20E+06 | 1.10E+07 | 6.90E+06 |
| Q87RE7  | Succinyl-CoA ligase [ADP-forming] subunit alpha OS=Vibrio parahaemolyticus serotype O3K6 (strain RIMD 2210633) GN=VP0850 PE=3 SV=1                                                   | 34.5 | 30.0  | 1.10E+07 | 2.40E+07 | 7.50E+06 | 1.50E+07 | 3.00E+07 | 2.60E+07 |
| Q87RE8  | Succinyl-CoA ligase [ADP-forming] subunit beta OS=Vibrio parahaemolyticus serotype O3K6 (strain RIMD 2210633) GN=sucC PE=3 SV=1                                                      | 50.8 | 41.5  | 3.30E+07 | 5.60E+07 | 3.20E+07 | 3.60E+07 | 6.40E+07 | 5.50E+07 |
| Q87RE9  | Dihydrodipicolinate residue succinyltransferase component of 2-oxoglutarate dehydrogenase complex OS=Vibrio parahaemolyticus serotype O3K6 (strain RIMD 2210633) GN=VP0848 PE=3 SV=1 | 11.7 | 43.7  | 3.90E+06 | 7.60E+06 | 2.70E+06 | 6.00E+06 | 1.40E+07 | 1.10E+07 |
| Q87RF0  | 2-oxoglutarate dehydrogenase, E1 component OS=Vibrio parahaemolyticus serotype O3K6 (strain RIMD 2210633) GN=VP0847 PE=4 SV=1                                                        | 3.8  | 106.0 | 2.50E+06 | 2.00E+06 |          |          | 4.80E+06 |          |
| Q87RF5  | Citrate synthase OS=Vibrio parahaemolyticus serotype O3K6 (strain RIMD 2210633) GN=VP0842 PE=3 SV=1                                                                                  | 5.1  | 48.2  |          | 5.30E+06 |          | 5.90E+06 | 1.10E+07 |          |
| Q87RG4  | Glutamine-tRNA ligase OS=Vibrio parahaemolyticus serotype O3K6 (strain RIMD 2210633) GN=gluS PE=3 SV=1                                                                               | 19.2 | 63.9  | 1.10E+07 | 1.80E+07 | 1.20E+07 | 1.40E+07 | 2.20E+07 | 2.70E+07 |
| Q87RG5  | PTS system, N-acetylglucosamine-specific IIAB component OS=Vibrio parahaemolyticus serotype O3K6 (strain RIMD 2210633) GN=VP0831 PE=4 SV=1                                           | 2.1  | 54.5  |          |          |          | 2.30E+06 |          |          |
| Q87RG7  | N-acetylglucosamine-6-phosphate deacetylase OS=Vibrio parahaemolyticus serotype O3K6 (strain RIMD 2210633) GN=VP0829 PE=3 SV=1                                                       | 6.1  | 40.7  |          |          |          |          |          |          |
| Q87RH5  | Chaperone protein HtpG OS=Vibrio parahaemolyticus serotype O3K6 (strain RIMD 2210633) GN=htpG PE=3 SV=1                                                                              | 4.1  | 72.1  |          |          |          |          | 3.10E+06 |          |
| Q87RJ7  | Cysteine synthase OS=Vibrio parahaemolyticus serotype O3K6 (strain RIMD 2210633) GN=VP0797 PE=3 SV=1                                                                                 | 74.8 | 34.1  | 5.80E+07 | 9.40E+07 | 8.30E+07 | 1.00E+08 | 2.00E+08 | 2.00E+08 |
| Q87RL6  | Glutamate-tRNA ligase OS=Vibrio parahaemolyticus serotype O3K6 (strain RIMD 2210633) GN=gluX PE=3 SV=1                                                                               | 37.3 | 53.4  | 9.30E+06 | 1.80E+07 | 1.40E+07 | 1.90E+07 | 3.00E+07 | 2.70E+07 |
| Q87RL8  | Putative chitinase OS=Vibrio parahaemolyticus serotype O3K6 (strain                                                                                                                  |      |       |          |          |          |          |          |          |

Table S1

|        |                                                                                                                                                             |      |       |          |          |          |          |          |          |
|--------|-------------------------------------------------------------------------------------------------------------------------------------------------------------|------|-------|----------|----------|----------|----------|----------|----------|
| Q87SA8 | Oxidoreductase Tas, aldo-/keto reductase family OS=Vibrio parahaemolyticus serotype O3:K6 (strain RIMD 2210633) GN=VP0516 PE=4 SV=1                         | 22.7 | 39.7  | 5.10E+06 | 7.90E+06 | 7.20E+06 | 7.40E+06 | 1.50E+07 | 1.70E+07 |
| Q87SC7 | Autonomous glycol radical cofactor OS=Vibrio parahaemolyticus serotype O3:K6 (strain RIMD 2210633) GN=grcA PE=3 SV=1                                        | 5.6  | 13.9  |          |          | 7.60E+06 | 1.60E+07 | 2.70E+07 |          |
| Q87SC8 | Threonine synthase OS=Vibrio parahaemolyticus serotype O3:K6 (strain RIMD 2210633) GN=VP0496 PE=4 SV=1                                                      | 10.1 | 46.5  | 4.60E+06 | 5.40E+06 |          | 3.60E+06 | 6.70E+06 | 6.30E+06 |
| Q87SC9 | Homoserine kinase OS=Vibrio parahaemolyticus serotype O3:K6 (strain RIMD 2210633) GN=thrB PE=3 SV=1                                                         | 2.8  | 34.4  |          |          | 2.60E+06 |          | 7.50E+06 |          |
| Q87SD0 | Aspartokinase I/homoserine dehydrogenase, threonine-sensitive OS=Vibrio parahaemolyticus serotype O3:K6 (strain RIMD 2210633) GN=VP0494 PE=4 SV=1           | 1.5  | 88.4  |          |          |          |          | 4.30E+06 |          |
| Q87SE0 | Glutamate synthase, large subunit OS=Vibrio parahaemolyticus serotype O3:K6 (strain RIMD 2210633) GN=VP0484 PE=4 SV=1                                       | 11.9 | 175.2 | 4.20E+06 | 6.60E+06 | 2.90E+06 | 1.40E+07 | 1.40E+07 | 1.00E+07 |
| Q87SE2 | Glutamate synthase, large subunit OS=Vibrio parahaemolyticus serotype O3:K6 (strain RIMD 2210633) GN=VP0482 PE=4 SV=1                                       | 22.0 | 162.9 | 9.80E+06 | 1.20E+07 | 7.40E+06 | 1.10E+07 | 1.80E+07 | 1.50E+07 |
| Q87SE3 | Glutamate synthase, small subunit OS=Vibrio parahaemolyticus serotype O3:K6 (strain RIMD 2210633) GN=VP0481 PE=4 SV=1                                       | 4.0  | 52.5  |          |          |          |          | 2.40E+06 |          |
| Q87SF3 | Carbamoyl-phosphate synthase large chain OS=Vibrio parahaemolyticus serotype O3:K6 (strain RIMD 2210633) GN=carB PE=3 SV=1                                  | 6.2  | 117.8 | 4.40E+06 | 6.00E+06 | 5.00E+06 | 8.00E+06 | 1.50E+07 | 9.20E+06 |
| Q87SF4 | Carbamoyl-phosphate synthase small chain OS=Vibrio parahaemolyticus serotype O3:K6 (strain RIMD 2210633) GN=carA PE=3 SV=1                                  | 2.6  | 41.0  |          |          |          |          | 4.90E+06 | 3.60E+06 |
| Q87SF5 | 4-hydroxy-tetrahydronicotinamide reductase OS=Vibrio parahaemolyticus serotype O3:K6 (strain RIMD 2210633) GN=dapB PE=3 SV=1                                | 18.2 | 28.6  | 3.60E+06 | 7.30E+06 | 4.50E+06 | 7.90E+06 | 1.20E+07 | 8.60E+06 |
| Q87SH9 | Stringent starvation protein A OS=Vibrio parahaemolyticus serotype O3:K6 (strain RIMD 2210633) GN=VP0444 PE=3 SV=1                                          | 12.3 | 24.3  |          |          | 1.80E+06 | 2.70E+06 | 5.70E+06 | 7.70E+06 |
| Q87SI4 | 30S ribosomal protein S9 OS=Vibrio parahaemolyticus serotype O3:K6 (strain RIMD 2210633) GN=rpsI PE=3 SV=1                                                  | 20.0 | 14.6  | 1.90E+06 | 2.80E+06 |          | 2.70E+06 | 5.30E+06 | 5.30E+06 |
| Q87SJ0 | Protease DO OS=Vibrio parahaemolyticus serotype O3:K6 (strain RIMD 2210633) GN=VP0433 PE=4 SV=1                                                             | 14.1 | 48.1  |          |          | 3.20E+06 | 5.50E+06 | 8.30E+06 | 5.00E+06 |
| Q87SJ8 | Outer membrane protein TolG OS=Vibrio parahaemolyticus serotype O3:K6 (strain RIMD 2210633) GN=VP0425 PE=4 SV=1                                             | 24.9 | 48.0  | 3.60E+06 | 5.90E+06 | 3.60E+06 | 5.80E+06 | 1.20E+07 | 7.90E+06 |
| Q87SK3 | Uncharacterized protein OS=Vibrio parahaemolyticus serotype O3:K6 (strain RIMD 2210633) GN=VP0420 PE=4 SV=1                                                 | 10.2 | 59.2  | 2.10E+06 | 4.40E+06 | 2.90E+06 | 4.30E+06 | 4.90E+06 | 6.50E+06 |
| Q87SR3 | Glutamine-fructose-6-phosphate aminotransferase [isomerizing] OS=Vibrio parahaemolyticus serotype O3:K6 (strain RIMD 2210633) GN=glmS PE=3 SV=2             | 3.1  | 66.8  |          | 1.30E+06 |          | 9.00E+05 |          |          |
| Q87SR6 | Pyruvate kinase OS=Vibrio parahaemolyticus serotype O3:K6 (strain RIMD 2210633) GN=VP0356 PE=3 SV=1                                                         | 3.0  | 49.9  | 2.90E+06 | 5.50E+06 |          | 4.50E+06 | 1.10E+07 |          |
| Q87SS8 | 3-isopropylmalate dehydrogenase OS=Vibrio parahaemolyticus serotype O3:K6 (strain RIMD 2210633) GN=lepB PE=3 SV=1                                           | 35.8 | 39.3  | 8.00E+06 | 1.20E+07 | 1.10E+07 | 1.60E+07 | 2.70E+07 | 2.50E+07 |
| Q87ST3 | LPS-assemble protein LptD OS=Vibrio parahaemolyticus serotype O3:K6 (strain RIMD 2210633) GN=lptD PE=3 SV=1                                                 | 2.9  | 89.2  | 1.70E+06 | 2.80E+06 |          |          | 2.40E+06 | 3.20E+06 |
| Q87ST4 | Chaperone SurA OS=Vibrio parahaemolyticus serotype O3:K6 (strain RIMD 2210633) GN=surA PE=3 SV=1                                                            | 8.0  | 47.4  | 2.70E+06 | 4.50E+06 | 3.50E+06 |          | 5.10E+06 |          |
| Q87SU7 | Malate dehydrogenase OS=Vibrio parahaemolyticus serotype O3:K6 (strain RIMD 2210633) GN=mdh PE=3 SV=1                                                       | 58.2 | 32.2  | 1.30E+07 | 2.60E+07 | 1.30E+07 | 2.10E+07 | 3.90E+07 | 2.80E+07 |
| Q87SV0 | Immunogenic protein OS=Vibrio parahaemolyticus serotype O3:K6 (strain RIMD 2210633) GN=VP0323 PE=4 SV=1                                                     | 58.7 | 34.5  | 2.90E+07 | 5.20E+07 | 4.40E+07 | 5.90E+07 | 9.90E+07 | 1.00E+08 |
| Q87SW0 | Fructose-1,6-bisphosphatase class 1 OS=Vibrio parahaemolyticus serotype O3:K6 (strain RIMD 2210633) GN=fbp PE=3 SV=1                                        | 3.3  | 37.3  |          | 5.20E+06 |          |          |          |          |
| Q87SX0 | Uncharacterized protein OS=Vibrio parahaemolyticus serotype O3:K6 (strain RIMD 2210633) GN=VP0302 PE=4 SV=1                                                 | 3.8  | 23.3  |          | 5.30E+06 | 5.70E+06 | 7.00E+06 | 1.50E+07 | 1.20E+07 |
| Q87SX9 | Sulfate adenylyltransferase subunit 1 OS=Vibrio parahaemolyticus serotype O3:K6 (strain RIMD 2210633) GN=cysN PE=3 SV=1                                     | 2.5  | 52.6  |          |          |          | 2.80E+06 | 4.80E+06 |          |
| Q87SY2 | 2',3'-cyclic-nucleotide 2'-phosphodiesterase OS=Vibrio parahaemolyticus serotype O3:K6 (strain RIMD 2210633) GN=VP0290 PE=3 SV=1                            | 13.1 | 72.1  |          | 5.30E+06 | 5.70E+06 | 5.30E+06 | 8.40E+06 | 7.40E+06 |
| Q87SZ0 | DNA-directed RNA polymerase subunit alpha OS=Vibrio parahaemolyticus serotype O3:K6 (strain RIMD 2210633) GN=rpoA PE=3 SV=1                                 | 10.3 | 36.5  | 2.90E+06 | 3.50E+06 | 2.00E+06 | 4.80E+06 | 8.50E+06 | 6.40E+06 |
| Q87SZ1 | 30S ribosomal protein S4 OS=Vibrio parahaemolyticus serotype O3:K6 (strain RIMD 2210633) GN=rpsD PE=3 SV=1                                                  | 24.8 | 23.3  | 3.50E+06 | 5.20E+06 |          | 1.10E+06 | 5.40E+06 | 1.10E+07 |
| Q87SZ2 | 30S ribosomal protein S13 OS=Vibrio parahaemolyticus serotype O3:K6 (strain RIMD 2210633) GN=rpsM PE=3 SV=1                                                 | 11.0 | 13.3  |          |          |          |          | 5.10E+06 |          |
| Q87T02 | 50S ribosomal protein L24 OS=Vibrio parahaemolyticus serotype O3:K6 (strain RIMD 2210633) GN=rplX PE=3 SV=1                                                 | 9.5  | 11.2  |          |          |          |          | 2.70E+06 |          |
| Q87T13 | 50S ribosomal protein L3 OS=Vibrio parahaemolyticus serotype O3:K6 (strain RIMD 2210633) GN=rplC PE=3 SV=1                                                  | 4.8  | 22.4  |          | 5.60E+06 |          |          |          |          |
| Q87T31 | Triosephosphate isomerase OS=Vibrio parahaemolyticus serotype O3:K6 (strain RIMD 2210633) GN=tpiA PE=3 SV=1                                                 | 23.0 | 26.9  | 4.60E+06 | 8.90E+06 | 7.40E+06 | 1.30E+07 | 2.00E+07 | 2.10E+07 |
| Q87T36 | Plin glycosylation protein OS=Vibrio parahaemolyticus serotype O3:K6 (strain RIMD 2210633) GN=VP0234 PE=3 SV=1                                              | 33.2 | 43.4  | 1.30E+07 | 2.00E+07 | 1.70E+07 | 2.30E+07 | 3.40E+07 | 3.20E+07 |
| Q87T41 | 4TDP-4-dehydrohamnose 3,5-epimerase OS=Vibrio parahaemolyticus serotype O3:K6 (strain RIMD 2210633) GN=VP0229 PE=4 SV=1                                     | 5.9  | 21.2  |          |          |          |          | 5.80E+06 | 6.30E+06 |
| Q87T56 | ADP-L-glycero-D-manno-heptose-6-epimerase OS=Vibrio parahaemolyticus serotype O3:K6 (strain RIMD 2210633) GN=hhd PE=3 SV=1                                  | 3.2  | 35.2  |          |          |          |          |          |          |
| Q87T66 | Putative 3-chlorobenzoate-3,4-dioxygenase dyhydrogenase related protein OS=Vibrio parahaemolyticus serotype O3:K6 (strain RIMD 2210633) GN=VP0204 PE=4 SV=1 | 3.2  | 38.5  |          | 3.10E+06 |          |          | 6.80E+06 |          |
| Q87T98 | Putative binding protein component of ABC transporter OS=Vibrio parahaemolyticus serotype O3:K6 (strain RIMD 2210633) GN=VP0172 PE=4 SV=1                   | 9.4  | 69.6  |          |          | 2.30E+06 | 6.80E+06 | 7.80E+06 | 1.00E+07 |
| Q87TA2 | Uncharacterized protein OS=Vibrio parahaemolyticus serotype O3:K6 (strain RIMD 2210633) GN=VP0168 PE=3 SV=1                                                 | 1.3  | 93.9  |          |          |          | 3.10E+06 |          | 3.60E+06 |
| Q87TA4 | Putative TolR OS=Vibrio parahaemolyticus serotype O3:K6 (strain RIMD 2210633) GN=VP0166 PE=3 SV=1                                                           | 8.8  | 49.3  |          | 1.10E+06 |          | 3.90E+06 | 5.70E+06 |          |
| Q87TA8 | Uncharacterized protein OS=Vibrio parahaemolyticus serotype O3:K6 (strain RIMD 2210633) GN=VP0162 PE=4 SV=1                                                 | 2.7  | 45.5  | 2.20E+07 | 2.00E+07 | 3.00E+07 | 2.40E+07 | 4.60E+07 |          |
| Q87TB9 | Uncharacterized protein OS=Vibrio parahaemolyticus serotype O3:K6 (strain RIMD 2210633) GN=VP0151 PE=4 SV=1                                                 | 6.7  | 70.4  |          | 4.40E+06 | 3.50E+06 | 4.00E+06 | 5.80E+06 | 6.20E+06 |
| Q87TE1 | Phosphoenolpyruvate carboxylase [ATP] OS=Vibrio parahaemolyticus serotype O3:K6 (strain RIMD 2210633) GN=pckA PE=3 SV=1                                     | 71.0 | 60.0  | 6.20E+07 | 8.90E+07 | 4.90E+07 | 9.90E+07 | 9.00E+07 | 8.40E+07 |
| Q87TE8 | Glutamine synthetase OS=Vibrio parahaemolyticus serotype O3:K6 (strain RIMD 2210633) GN=VP0121 PE=3 SV=1                                                    | 58.4 | 51.5  | 1.00E+08 | 1.30E+08 | 1.10E+08 | 1.50E+08 | 2.00E+08 | 2.30E+08 |
| Q87TG2 | DNA polymerase I OS=Vibrio parahaemolyticus serotype O3:K6 (strain RIMD 2210633) GN=VP0107 PE=3 SV=1                                                        | 8.8  | 103.1 | 3.80E+06 | 4.60E+06 | 3.00E+06 | 5.00E+06 | 8.40E+06 | 5.10E+06 |
| Q87TG5 | Delta-aminolevulinic acid dehydratase OS=Vibrio parahaemolyticus serotype O3:K6 (strain RIMD 2210633) GN=VP0104 PE=3 SV=1                                   | 16.7 | 39.2  | 5.90E+06 | 8.90E+06 | 7.80E+06 | 9.20E+06 | 1.30E+07 | 1.40E+07 |
| Q87TI3 | Uncharacterized protein OS=Vibrio parahaemolyticus serotype O3:K6 (strain RIMD 2210633) GN=VP0086 PE=4 SV=1                                                 | 13.6 | 15.3  |          |          |          |          |          |          |
| Q87TI9 | Oligopeptidase A OS=Vibrio parahaemolyticus serotype O3:K6 (strain RIMD 2210633) GN=VP0070 PE=3 SV=1                                                        | 24.9 | 76.9  | 3.40E+07 | 5.20E+07 | 4.70E+07 | 7.00E+07 | 1.10E+08 | 1.10E+08 |
| Q87TJ1 | Glutathione reductase OS=Vibrio parahaemolyticus serotype O3:K6 (strain RIMD 2210633) GN=VP0068 PE=3 SV=1                                                   | 24.6 | 49.2  | 1.10E+07 | 2.40E+07 | 2.00E+07 | 2.30E+07 | 3.50E+07 | 4.10E+07 |
| Q87TM1 | Peptide ABC transporter, periplasmic peptide-binding protein OS=Vibrio parahaemolyticus serotype O3:K6 (strain RIMD 2210633) GN=VP0048 PE=4 SV=1            | 63.4 | 57.4  | 7.70E+07 | 1.30E+08 | 1.10E+08 | 1.20E+08 | 2.10E+08 | 2.00E+08 |
| Q87TN4 | Ketol-acid reductoisomerase OS=Vibrio parahaemolyticus serotype O3:K6 (strain RIMD 2210633) GN=ivk PE=3 SV=1                                                | 57.5 | 54.7  | 3.20E+07 | 5.90E+07 | 4.70E+07 | 6.60E+07 | 1.10E+08 | 1.00E+08 |
| Q87TR0 | Amino acid ABC transporter, periplasmic amino acid-binding portion OS=Vibrio parahaemolyticus serotype O3:K6 (strain RIMD 2210633) GN=VP0008 PE=3 SV=1      | 22.2 | 27.5  |          | 2.90E+06 |          | 2.50E+06 | 5.70E+06 | 8.20E+06 |
| Q89289 | Thermolabile hemolysin OS=Vibrio parahaemolyticus serotype O3:K6 (strain RIMD 2210633) GN=VPA0226 PE=1 SV=2                                                 | 3.1  | 47.4  |          |          |          |          | 4.00E+07 |          |
| Q9ALY5 | Cyclic AMP receptor protein OS=Vibrio parahaemolyticus serotype O3:K6 (strain RIMD 2210633) GN=VP2793 PE=4 SV=1                                             | 37.1 | 23.7  | 5.10E+06 | 9.30E+06 | 6.40E+06 | 9.20E+06 | 2.20E+07 | 1.50E+07 |
| Q9L7P5 | 60 kDa chaperonin 1 OS=Vibrio parahaemolyticus serotype O3:K6 (strain RIMD 2210633) GN=grpL1 PE=3 SV=2                                                      | 40.0 | 57.5  | 2.80E+07 | 3.90E+07 | 3.20E+07 | 3.80E+07 | 5.70E+07 | 3.70E+07 |
| Q9ZBA2 | Polar flagellin E OS=Vibrio parahaemolyticus serotype O3:K6 (strain RIMD 2210633) GN=flaE PE=3 SV=2                                                         | 1.6  | 40.7  |          | 3.50E+06 |          | 6.40E+06 |          | 5.80E+06 |

1st Experiment (Soluble Fraction)

| Accession | Description                                                                                                         | Coverage | MW [kDa] | Control  | GlcNAc   | GlcN     | (GlcNAc)2 | (GlcN)2  | GlcNAc-GlcN |
|-----------|---------------------------------------------------------------------------------------------------------------------|----------|----------|----------|----------|----------|-----------|----------|-------------|
| A7JEM1    | Transhydrogenase alpha subunit (Fragment) OS=Vibrio parahaemolyticus GN=pntA PE=4 SV=1                              | 7.0      | 15.5     |          |          |          |           |          | 4.20E+06    |
| A7JET7    | Protein RecA (Fragment) OS=Vibrio parahaemolyticus GN=recA PE=3 SV=1                                                | 42.4     | 26.0     | 8.60E+06 | 1.20E+07 | 1.10E+07 | 5.60E+06  | 1.50E+07 | 9.50E+06    |
| A7JEX3    | DNA gyrase beta-subunit (Fragment) OS=Vibrio parahaemolyticus GN=gyrB PE=4 SV=1                                     | 11.7     | 21.7     |          |          | 8.90E+06 |           | 4.90E+06 | 8.90E+06    |
| A9QBJ2    | Protein RecA (Fragment) OS=Vibrio parahaemolyticus GN=recA PE=3 SV=1                                                | 42.2     | 22.4     | 8.60E+06 | 1.20E+07 | 1.10E+07 | 5.60E+06  | 1.50E+07 | 1.40E+07    |
| A9QB61    | DNA gyrase B subunit (Fragment) OS=Vibrio parahaemolyticus GN=gyrB PE=4 SV=1                                        | 13.5     | 18.6     |          |          | 8.90E+06 |           | 4.90E+06 | 8.90E+06    |
| A9QBQ3    | Phosphoglucosyltransferase (Fragment) OS=Vibrio parahaemolyticus GN=pgm PE=3 SV=1                                   | 26.5     | 21.2     | 6.70E+06 | 1.10E+07 | 8.10E+06 | 1.20E+07  | 1.40E+07 | 1.30E+07    |
| H8BAG3    | Protein RecA (Fragment) OS=Vibrio parahaemolyticus GN=recA PE=3 SV=1                                                | 51.1     | 18.0     | 7.20E+06 | 1.30E+07 | 1.10E+07 | 2.80E+06  | 1.70E+07 |             |
| IS0286    | Dihydropyridyl dehydrogenase OS=Vibrio parahaemolyticus serotype O3:K6 (strain RIMD 2210633) GN=lpd PE=3 SV=2       | 35.4     | 51.0     | 1.80E+07 | 3.10E+07 | 2.80E+07 | 3.20E+07  | 3.40E+07 | 3.20E+07    |
| IS0189    | DNA gyrase subunit B OS=Vibrio parahaemolyticus serotype O3:K6 (strain RIMD 2210633) GN=gyrB PE=3 SV=2              | 16.8     | 89.4     | 5.30E+06 | 7.70E+06 | 8.80E+06 | 1.00E+07  | 5.90E+06 | 9.50E+06    |
| POA2W2    | Acyl carrier protein OS=Vibrio parahaemolyticus serotype O3:K6 (strain RIMD 2210633) GN=accP PE=3 SV=2              | 18.2     | 8.5      |          |          |          |           | 4.10E+06 | 4.70E+06    |
| Q0A481    | 50S ribosomal protein L20 OS=Vibrio parahaemolyticus serotype O3:K6 (strain RIMD 2210633) GN=rplT PE=3 SV=1         | 16.2     | 13.4     |          | 4.60E+06 | 9.60E+06 | 1.00E+07  | 1.20E+07 | 9.70E+06    |
| P22097    | Tryptophan synthase beta chain 1 OS=Vibrio parahaemolyticus serotype O3:K6 (strain RIMD 2210633) GN=trpB1 PE=3 SV=2 | 8.3      | 43.0     | 3.00E+06 | 4.20E+06 | 5.60E+06 | 9.10E+06  | 2.60E+06 | 4.90E+06    |
| P22099    | Anthranilate synthase component 1 OS=Vibrio parahaemolyticus serotype O3:K6 (strain RIMD 2210633) GN=trpE PE=3 SV=2 | 3.9      | 59.7     |          | 1.90E+06 |          | 5.30E+06  | 2.50E+06 | 2.60E+06    |
| P40611    | Adenylylsuccinate synthetase OS=Vibrio parahaemolyticus serotype O3:K6 (strain RIMD 2210633) GN=sucA PE=3 SV=3      | 26.0     | 47.7     | 1.10E+07 | 2.00E+07 | 1.70E+07 | 2.00E+07  | 3.00E+07 | 2.30E+07    |
| P40611    | Ribonuclease R OS=Vibrio parahaemolyticus serotype O3:K6 (strain RIMD 2210633) GN=rnr PE=3 SV=2                     | 2.8      | 95.0     | 1.10E+06 |          |          |           |          |             |
| P59494    | Maltoporin OS=Vibrio parahaemolyticus serotype O3:K6 (strain RIMD 2210633) GN=lamB PE=3 SV=1                        | 41.2     | 46.9     | 3.00E+07 | 2.70E+07 | 2.60E+07 | 2.60E+07  | 5.70E+07 | 5.10E+07    |
| P59605    | Argininosuccinate synthase OS=Vibrio parahaemolyticus serotype O3:K6 (strain RIMD 2210633) GN=argG PE=3 SV=1        | 56.2     | 44.5     | 4.30E+07 | 5.40E+07 | 5.50E+07 | 7.30E+07  | 9.10E+07 | 7.20E+07    |
| P59620    | Bifunctional protein ArgH OS=Vibrio parahaemolyticus serotype O3:K6 (strain RIMD 2210633) GN=argH PE=3 SV=1         | 23.7     | 69.3     | 5.80E+06 | 7.80E+06 | 9.20E+06 | 1.70E+07  | 1.40E+07 | 1.00E+07    |
| P66346    | 30S ribosomal protein S10 OS=Vibrio parahaemolyticus serotype O3:K6 (strain RIMD 2210633) GN=rpsJ PE=3 SV=1         | 34.0     | 11.7     |          |          |          |           |          |             |



Table S1

|         |                                                                                                                                                           |             |             |          |                 |          |                 |          |                 |
|---------|-----------------------------------------------------------------------------------------------------------------------------------------------------------|-------------|-------------|----------|-----------------|----------|-----------------|----------|-----------------|
| Q87GB6  | Maltose ABC transporter, periplasmic maltose-binding protein OS=Vibrio parahaemolyticus serotype O3:K6 (strain RIMD 2210633) GN=VPA1401 PE=4 SV=1         | 58.4        | 42.1        | 3.70E+07 | 6.20E+07        | 6.00E+07 | 5.80E+07        | 6.40E+07 | 6.00E+07        |
| Q87GC0  | Acyl-CoA thioester hydrolase-related protein OS=Vibrio parahaemolyticus serotype O3:K6 (strain RIMD 2210633) GN=VPA1397 PE=4 SV=1                         | 21.7        | 17.7        | 3.70E+06 | 9.40E+06        | 1.20E+07 | 1.10E+07        | 1.60E+07 | 1.20E+07        |
| Q87GC8  | Uncharacterized protein OS=Vibrio parahaemolyticus serotype O3:K6 (strain RIMD 2210633) GN=VPA1389 PE=4 SV=1                                              | 5.8         | 39.4        |          |                 |          |                 |          |                 |
| Q87GK7  | Uncharacterized protein OS=Vibrio parahaemolyticus serotype O3:K6 (strain RIMD 2210633) GN=VPA1308 PE=4 SV=1                                              | 16.6        | 42.3        | 3.80E+06 |                 | 5.20E+06 | 2.90E+06        | 8.40E+06 | 1.20E+07        |
| Q87GL1  | Putative 3-oxoacyl-(Acyl carrier protein) reductase OS=Vibrio parahaemolyticus serotype O3:K6 (strain RIMD 2210633) GN=VPA1304 PE=3 SV=1                  | 4.2         | 25.2        | 2.00E+06 | 4.90E+06        | 5.10E+06 |                 |          | 5.10E+06        |
| Q87GT5  | Glyceraldehyde-3-phosphate dehydrogenase OS=Vibrio parahaemolyticus serotype O3:K6 (strain RIMD 2210633) GN=VPA1230 PE=3 SV=1                             | 23.7        | 52.3        | 8.60E+06 | 1.80E+07        | 7.10E+06 | 1.40E+07        | 1.10E+07 | 9.20E+06        |
| Q87GWC0 | Acetoacetyl-CoA reductase OS=Vibrio parahaemolyticus serotype O3:K6 (strain RIMD 2210633) GN=VPA1205 PE=3 SV=1                                            | 6.9         | 26.2        |          |                 |          |                 | 3.90E+06 | 4.00E+06        |
| Q87GW1  | Acetyl-CoA acetyltransferase OS=Vibrio parahaemolyticus serotype O3:K6 (strain RIMD 2210633) GN=VPA1204 PE=3 SV=1                                         | 10.0        | 41.5        |          |                 |          |                 |          | 3.30E+06        |
| Q87GY0  | Phosphor-2-dehydro-3-deoxyheptanate aldolase OS=Vibrio parahaemolyticus serotype O3:K6 (strain RIMD 2210633) GN=VPA1185 PE=3 SV=1                         | 24.9        | 38.3        |          | 3.00E+07        | 3.70E+07 | 5.50E+07        | 2.40E+07 | 8.60E+06        |
| Q87GY4  | Transketolase 2 OS=Vibrio parahaemolyticus serotype O3:K6 (strain RIMD 2210633) GN=ttk2 PE=3 SV=1                                                         | 31.7        | 72.0        | 8.90E+06 | 1.10E+07        | 7.60E+06 | 1.50E+07        | 1.10E+07 | 1.30E+07        |
| Q87GY5  | Transaldolase OS=Vibrio parahaemolyticus serotype O3:K6 (strain RIMD 2210633) GN=tal PE=3 SV=1                                                            | 53.8        | 34.8        | 1.10E+07 | 2.00E+07        | 2.10E+07 | 3.10E+07        | 2.60E+07 | 2.60E+07        |
| Q87H02  | Oxidoreductase, aldo/keto reductase 2 family OS=Vibrio parahaemolyticus serotype O3:K6 (strain RIMD 2210633) GN=VPA1163 PE=4 SV=1                         | 2.6         | 34.0        |          |                 |          | 2.60E+06        |          |                 |
| Q87H16  | Uncharacterized protein OS=Vibrio parahaemolyticus serotype O3:K6 (strain RIMD 2210633) GN=VPA1149 PE=4 SV=1                                              | 12.3        | 45.3        | 4.70E+06 | 1.00E+07        | 8.90E+06 | 1.30E+07        | 9.40E+06 | 6.30E+06        |
| Q87HD1  | Uncharacterized protein OS=Vibrio parahaemolyticus serotype O3:K6 (strain RIMD 2210633) GN=VPA1034 PE=4 SV=1                                              | 7.2         | 55.3        |          |                 |          |                 | 1.10E+07 | 5.40E+06        |
| Q87HD7  | Putative ClpA/B-type chaperone OS=Vibrio parahaemolyticus serotype O3:K6 (strain RIMD 2210633) GN=VPA1028 PE=4 SV=1                                       | 0.8         | 93.9        |          |                 |          |                 | 1.20E+07 | 1.40E+07        |
| Q87HD8  | Uncharacterized protein OS=Vibrio parahaemolyticus serotype O3:K6 (strain RIMD 2210633) GN=VPA1027 PE=4 SV=1                                              | 18.2        | 17.7        |          |                 |          |                 | 9.90E+06 | 6.80E+06        |
| Q87HF4  | L-allo-threonine aldolase OS=Vibrio parahaemolyticus serotype O3:K6 (strain RIMD 2210633) GN=VPA1011 PE=4 SV=1                                            | 18.3        | 36.1        | 4.50E+06 | 6.80E+06        | 8.80E+06 | 1.10E+07        | 1.50E+07 | 1.30E+07        |
| Q87HG0  | D-lactate dehydrogenase OS=Vibrio parahaemolyticus serotype O3:K6 (strain RIMD 2210633) GN=VPA1005 PE=4 SV=1                                              | 6.2         | 64.3        | 4.00E+06 | 4.90E+06        | 5.80E+06 | 6.30E+06        | 6.50E+06 | 7.00E+06        |
| Q87H4   | Ferric aerobactin receptor OS=Vibrio parahaemolyticus serotype O3:K6 (strain RIMD 2210633) GN=VPA0979 PE=3 SV=1                                           | 4.8         | 79.2        | 2.70E+06 |                 |          | 3.50E+06        |          | 3.50E+06        |
| Q87HM7  | Amino acid biosynthesis aminotransferase OS=Vibrio parahaemolyticus serotype O3:K6 (strain RIMD 2210633) GN=VPA0936 PE=4 SV=1                             | 26.4        | 43.7        | 3.70E+06 | 9.70E+06        | 8.80E+06 | 1.10E+07        | 1.50E+07 | 1.30E+07        |
| Q87HP1  | NAD(P) transhydrogenase subunit alpha OS=Vibrio parahaemolyticus serotype O3:K6 (strain RIMD 2210633) GN=VPA0922 PE=3 SV=1                                | 6.0         | 54.8        |          |                 |          | 4.70E+06        |          | 6.30E+06        |
| Q87HS4  | Heme transport protein HntA OS=Vibrio parahaemolyticus serotype O3:K6 (strain RIMD 2210633) GN=VPA0882 PE=3 SV=1                                          | 19.8        | 77.3        | 6.60E+06 | 3.50E+06        | 8.10E+06 | 5.20E+06        | 7.50E+06 | 1.00E+07        |
| Q87HV6  | UPF0312 protein VPA0850 OS=Vibrio parahaemolyticus serotype O3:K6 (strain RIMD 2210633) GN=VPA0850 PE=3 SV=1                                              | 20.6        | 20.3        |          |                 | 6.30E+06 | 5.50E+06        | 7.10E+06 | 4.90E+06        |
| Q87I01  | Aminomethyltransferase OS=Vibrio parahaemolyticus serotype O3:K6 (strain RIMD 2210633) GN=VPA0805 PE=3 SV=1                                               | 4.3         | 40.3        |          | 2.70E+06        |          | 3.30E+06        | 4.40E+06 | 3.90E+06        |
| Q87I05  | Glycine dehydrogenase (decarboxylating) OS=Vibrio parahaemolyticus serotype O3:K6 (strain RIMD 2210633) GN=gcvp PE=3 SV=1                                 | 5.2         | 104.1       | 4.10E+06 | 5.40E+06        | 5.00E+06 | 5.20E+06        | 7.50E+06 |                 |
| Q87IE9  | Iron(III) ABC transporter, periplasmic iron-compound-binding protein OS=Vibrio parahaemolyticus serotype O3:K6 (strain RIMD 2210633) GN=VPA0657 PE=4 SV=1 | 20.5        | 33.5        | 1.80E+07 | 1.10E+07        | 1.10E+07 | 2.30E+07        | 1.80E+07 | 1.40E+07        |
| Q87IQ4  | Putative glutathione S-transferase OS=Vibrio parahaemolyticus serotype O3:K6 (strain RIMD 2210633) GN=VPA0642 PE=4 SV=1                                   | 5.1         | 24.3        |          |                 |          | 4.80E+06        |          |                 |
| Q87JL5  | Acetate kinase 2 OS=Vibrio parahaemolyticus serotype O3:K6 (strain RIMD 2210633) GN=ackA2 PE=3 SV=1                                                       | 28.5        | 42.6        | 8.50E+06 | 1.30E+07        | 1.50E+07 | 1.70E+07        | 2.80E+07 | 1.90E+07        |
| Q87L1   | ATP-binding component of molybdate transport system OS=Vibrio parahaemolyticus serotype O3:K6 (strain RIMD 2210633) GN=VPA0595 PE=4 SV=1                  | 1.7         | 55.4        |          |                 |          |                 | 4.50E+06 |                 |
| Q87M1   | Tryptophan synthase beta chain 2 OS=Vibrio parahaemolyticus serotype O3:K6 (strain RIMD 2210633) GN=trpB2 PE=3 SV=1                                       | 4.2         | 44.2        | 2.20E+06 | 4.40E+06        |          |                 |          |                 |
| Q87P0   | Alcohol dehydrogenase OS=Vibrio parahaemolyticus serotype O3:K6 (strain RIMD 2210633) GN=VPA0566 PE=4 SV=1                                                | 24.9        | 40.2        | 1.10E+07 | 1.90E+07        | 6.00E+06 | 6.30E+06        | 1.20E+07 | 7.20E+06        |
| Q87Q4   | Cold shock DNA-binding domain protein OS=Vibrio parahaemolyticus serotype O3:K6 (strain RIMD 2210633) GN=VPA0552 PE=4 SV=1                                | 36.2        | 7.5         |          | 1.10E+07        | 1.00E+07 | 1.30E+07        | 1.40E+07 | 8.80E+06        |
| Q87S1   | Putative phosphomannomutase OS=Vibrio parahaemolyticus serotype O3:K6 (strain RIMD 2210633) GN=VPA0535 PE=3 SV=1                                          | 35.3        | 61.6        | 1.30E+07 | 2.00E+07        | 1.50E+07 | 2.50E+07        | 2.10E+07 | 2.10E+07        |
| Q87V8   | Prolyl endopeptidase OS=Vibrio parahaemolyticus serotype O3:K6 (strain RIMD 2210633) GN=VPA0468 PE=4 SV=1                                                 | 2.7         | 84.2        |          | 5.20E+06        | 2.60E+06 | 4.90E+06        | 1.00E+07 | 8.80E+06        |
| Q87J24  | Uncharacterized protein OS=Vibrio parahaemolyticus serotype O3:K6 (strain RIMD 2210633) GN=VPA0429 PE=4 SV=1                                              | 6.8         | 20.2        | 2.90E+06 | 6.50E+06        |          | 8.40E+06        | 9.80E+06 | 6.90E+06        |
| Q87J26  | Coproporphyrinogen oxidase homolog PhuW OS=Vibrio parahaemolyticus serotype O3:K6 (strain RIMD 2210633) GN=VPA0427 PE=4 SV=1                              | 9.2         | 50.4        | 2.00E+06 |                 |          | 6.20E+06        | 6.30E+06 | 5.20E+06        |
| Q87J30  | Hemin ABC transporter, periplasmic hemin-binding protein HntB OS=Vibrio parahaemolyticus serotype O3:K6 (strain RIMD 2210633) GN=VPA0423 PE=4 SV=1        | 5.5         | 30.3        |          |                 |          |                 |          | 2.20E+06        |
| Q87J33  | LuxT OS=Vibrio parahaemolyticus serotype O3:K6 (strain RIMD 2210633) GN=VPA0420 PE=1 SV=1                                                                 | 7.2         | 17.5        |          | 2.20E+06        |          |                 |          |                 |
| Q87J81  | Phosphoenolpyruvate synthase OS=Vibrio parahaemolyticus serotype O3:K6 (strain RIMD 2210633) GN=VPA0372 PE=3 SV=1                                         | 53.2        | 88.1        | 9.70E+07 | 1.40E+08        | 1.00E+08 | 1.30E+08        | 1.30E+08 | 9.20E+07        |
| Q87J86  | Putrescine-binding periplasmic protein OS=Vibrio parahaemolyticus serotype O3:K6 (strain RIMD 2210633) GN=VPA0367 PE=3 SV=1                               | 22.4        | 38.7        | 3.50E+06 | 5.00E+06        | 7.70E+06 | 8.70E+06        | 1.20E+07 | 1.00E+07        |
| Q87J88  | Putative transcriptional regulator protein OS=Vibrio parahaemolyticus serotype O3:K6 (strain RIMD 2210633) GN=VPA0365 PE=4 SV=1                           | 3.4         | 33.2        | 3.10E+06 |                 |          |                 |          |                 |
| Q87J85  | Putative outer membrane protein OmpV OS=Vibrio parahaemolyticus serotype O3:K6 (strain RIMD 2210633) GN=VPA0318 PE=4 SV=1                                 | 4.7         | 28.1        | 2.10E+06 | 3.20E+06        |          |                 |          | 7.60E+06        |
| Q87JF1  | Uncharacterized protein OS=Vibrio parahaemolyticus serotype O3:K6 (strain RIMD 2210633) GN=VPA0302 PE=4 SV=1                                              | 10.9        | 14.7        |          |                 |          |                 | 6.40E+06 |                 |
| Q87JN3  | Uncharacterized protein OS=Vibrio parahaemolyticus serotype O3:K6 (strain RIMD 2210633) GN=VPA0215 PE=4 SV=1                                              | 17.3        | 11.9        |          |                 |          |                 |          |                 |
| Q87JR8  | Phospho-beta-glucosidase B OS=Vibrio parahaemolyticus serotype O3:K6 (strain RIMD 2210633) GN=VPA0180 PE=3 SV=1                                           | 4.1         | 53.0        | 2.10E+06 | 4.00E+06        | 2.50E+06 | 7.80E+06        | 4.80E+06 | 4.10E+06        |
| Q87JS8  | Biosynthetic arginine decarboxylase OS=Vibrio parahaemolyticus serotype O3:K6 (strain RIMD 2210633) GN=spaA PE=3 SV=1                                     | 6.4         | 72.0        | 1.40E+06 | 6.20E+06        | 5.20E+06 | 5.60E+06        | 5.30E+06 | 4.20E+06        |
| Q87JT2  | Putative outer membrane protein OS=Vibrio parahaemolyticus serotype O3:K6 (strain RIMD 2210633) GN=VPA0166 PE=4 SV=1                                      | 14.0        | 38.0        | 1.10E+07 | 8.70E+06        | 1.20E+07 | 1.80E+07        | 2.00E+07 | 1.70E+07        |
| Q87JV9  | Putative PmbA-related protein OS=Vibrio parahaemolyticus serotype O3:K6 (strain RIMD 2210633) GN=VPA0139 PE=4 SV=1                                        | 2.9         | 47.7        |          |                 | 3.20E+06 |                 |          | 4.10E+06        |
| Q87JW5  | Putative ABC transporter substrate-binding protein OS=Vibrio parahaemolyticus serotype O3:K6 (strain RIMD 2210633) GN=VPA0133 PE=4 SV=1                   | 4.4         | 34.7        |          |                 |          |                 |          | 2.60E+06        |
| Q87K02  | Outer membrane protein OmpW OS=Vibrio parahaemolyticus serotype O3:K6 (strain RIMD 2210633) GN=VPA0096 PE=4 SV=1                                          | 6.5         | 23.5        | 3.80E+06 | 3.30E+06        | 4.00E+06 | 2.80E+06        | 7.00E+06 | 4.10E+06        |
| Q87K50  | Uncharacterized protein OS=Vibrio parahaemolyticus serotype O3:K6 (strain RIMD 2210633) GN=VPA0047 PE=4 SV=1                                              | 4.4         | 31.1        |          |                 |          |                 |          |                 |
| Q87K60  | <b>Glucosamine-6-phosphate deaminase OS=Vibrio parahaemolyticus serotype O3:K6 (strain RIMD 2210633) GN=ga6B PE=3 SV=1</b>                                | <b>13.5</b> | <b>29.6</b> |          | <b>8.50E+06</b> |          | <b>1.60E+07</b> |          | <b>1.40E+07</b> |
| Q87K95  | Peptide ABC transporter, ATP-binding protein OS=Vibrio parahaemolyticus serotype O3:K6 (strain RIMD 2210633) GN=VPA0003 PE=3 SV=1                         | 7.4         | 34.9        |          |                 |          |                 |          | 6.40E+06        |
| Q87KA6  | ATP synthase subunit alpha OS=Vibrio parahaemolyticus serotype O3:K6 (strain RIMD 2210633) GN=atpA PE=3 SV=1                                              | 58.7        | 56.6        | 5.40E+07 | 8.20E+07        | 8.00E+07 | 9.30E+07        | 1.20E+08 | 9.60E+07        |
| Q87KA7  | ATP synthase gamma chain OS=Vibrio parahaemolyticus serotype O3:K6 (strain RIMD 2210633) GN=atpG PE=3 SV=1                                                | 32.6        | 31.8        | 5.90E+06 | 1.40E+07        | 1.10E+07 | 1.80E+07        | 1.70E+07 | 1.60E+07        |
| Q87KA8  | ATP synthase subunit beta OS=Vibrio parahaemolyticus serotype O3:K6 (strain RIMD 2210633) GN=atpD PE=3 SV=1                                               | 56.5        | 50.7        | 4.80E+07 | 7.70E+07        | 6.70E+07 | 8.30E+07        | 1.00E+08 | 7.50E+07        |
| Q87KB5  | L-threonine dehydratase OS=Vibrio parahaemolyticus serotype O3:K6 (strain RIMD 2210633) GN=iva PE=3 SV=1                                                  | 11.8        | 56.6        | 4.60E+06 | 8.60E+06        | 4.30E+06 |                 | 7.80E+06 | 6.00E+06        |
| Q87KB6  | Dihydroxy-acid dehydratase OS=Vibrio parahaemolyticus serotype O3:K6 (strain RIMD 2210633) GN=ivd PE=3 SV=1                                               | 47.8        | 65.6        | 1.80E+07 | 2.50E+07        | 2.20E+07 | 3.20E+07        | 3.00E+07 | 3.10E+07        |
| Q87KB7  | Branched-chain amino acid aminotransferase OS=Vibrio parahaemolyticus serotype O3:K6 (strain RIMD 2210633) GN=vp3060 PE=3 SV=1                            | 9.0         | 34.3        | 5.60E+06 | 1.00E+07        | 8.90E+06 | 1.40E+07        | 1.50E+07 | 1.40E+07        |
| Q87KB9  | Acetolactate synthase OS=Vibrio parahaemolyticus serotype O3:K6 (strain RIMD 2210633) GN=vp3058 PE=3 SV=1                                                 | 4.9         | 59.2        |          |                 |          | 2.30E+06        | 1.40E+06 |                 |
| Q87KF6  | Aminopeptidase P OS=Vibrio parahaemolyticus serotype O3:K6 (strain RIMD 2210633) GN=vp3021 PE=4 SV=1                                                      | 10.9        | 65.5        | 3.00E+06 | 9.20E+06        | 8.00E+06 | 1.10E+07        | 5.40E+06 | 7.50E+06        |
| Q87KH7  | Transcription termination factor Rho OS=Vibrio parahaemolyticus serotype O3:K6 (strain RIMD 2210633) GN=rho PE=3 SV=1                                     | 13.8        | 46.8        |          | 3.10E+06        | 3.50E+06 | 1.40E+06        | 6.80E+06 | 4.10E+06        |
| Q87KJ3  | Diaminopimelate decarboxylase OS=Vibrio parahaemolyticus serotype O3:K6 (strain RIMD 2210633) GN=lysA PE=3 SV=1                                           | 18.2        | 45.9        | 2.60E+06 | 4.50E+06        | 6.40E+06 | 6.80E+06        | 8.10E+06 | 7.80E+06        |
| Q87KP9  | Transcription termination/antitermination protein NusG OS=Vibrio parahaemolyticus serotype O3:K6 (strain RIMD 2210633) GN=nusG PE=3 SV=2                  | 5.5         | 20.7        |          |                 |          |                 |          | 5.50E+06        |
| Q87KQ0  | 50S ribosomal protein L11 OS=Vibrio parahaemolyticus serotype O3:K6 (strain RIMD 2210633) GN=rplK PE=3 SV=1                                               | 27.5        | 14.7        | 1.10E+07 | 2.60E+07        | 3.20E+07 | 3.90E+07        | 2.50E+07 | 3.80E+07        |
| Q87KQ1  | 50S ribosomal protein L1 OS=Vibrio parahaemolyticus serotype O3:K6 (strain RIMD 2210633) GN=rplA PE=3 SV=1                                                | 48.9        | 24.7        | 1.30E+07 | 2.20E+07        | 2.70E+07 | 3.50E+07        | 3.20E+07 | 3.90E+07        |
| Q87KQ2  | 50S ribosomal protein L10 OS=Vibrio parahaemolyticus serotype O3:K6 (strain RIMD 2210633) GN=rplJ PE=3 SV=1                                               | 13.6        | 17.3        |          |                 |          | 7.50E+06        | 3.50E+06 |                 |
| Q87KQ3  | 50S ribosomal protein L7/L12 OS=Vibrio parahaemolyticus serotype O3:K6 (strain RIMD 2210633) GN=rplL PE=3 SV=1                                            | 19.7        | 12.2        | 4.10E+06 | 1.10E+07        | 1.30E+07 | 1.80E+07        | 1.70E+07 | 1.60E+07        |
| Q87KQ4  | DNA-directed RNA polymerase subunit beta OS=Vibrio parahaemolyticus serotype O3:K6 (strain RIMD 2210633) GN=rpoB PE=3 SV=1                                | 41.6        | 149.5       | 1.60E+07 | 2.40E+07        | 2.70E+07 | 3.10E+07        | 2.90E+07 | 2.80E+07        |
| Q87KQ5  | DNA-directed RNA polymerase subunit beta' OS=Vibrio parahaemolyticus serotype O3:K6 (strain RIMD 2210633) GN=rpoC PE=3 SV=1                               | 36.8        | 154.8       | 1.70E+07 | 2.30E+07        | 2.90E+07 | 3.30E+07        | 3.00E+07 | 3.20E+07        |
| Q87KQ6  | Regulator of sigma D OS=Vibrio parahaemolyticus serotype O3:K6 (strain RIMD 2210633) GN=vp2920 PE=3 SV=1                                                  | 9.8         | 18.6        | 1.80E+06 |                 |          |                 |          |                 |
| Q87KR5  | DNA-binding protein HU-2 OS=Vibrio parahaemolyticus serotype O3:K6 (strain RIMD 2210633) GN=vp2911 PE=3 SV=1                                              | 63.7        | 9.6         | 8.40E+06 | 2.40E+07        | 2.70E+07 | 2.50E+07        | 1.80E+07 | 2.30E+07        |
| Q87KS6  | Uncharacterized protein OS=Vibrio parahaemolyticus serotype O3:K6 (strain RIMD 2210633) GN=vp2900 PE=4 SV=1                                               | 2.0         | 57.1        |          | 2.40E+06        |          | 4.20E+06        |          |                 |
| Q87KT0  | Bifunctional purine biosynthesis protein PurH OS=Vibrio parahaemolyticus serotype O3:K6 (strain RIMD 2210633) GN=purH PE=3 SV=1                           | 28.5        | 57.3        | 4.70E+06 | 8.00E+06        | 8.20E+06 | 1.30E+07        | 1.70E+07 | 1.20E+07        |
| Q87KU4  | Acetyl-CoA carboxylase, biotin carboxylase OS=Vibrio parahaemolyticus serotype O3:K6 (strain RIMD 2210633) GN=vp2881 PE=4 SV=1                            | 28.9        | 49.2        | 5.90E+06 | 1.00E+07        | 1.50E+07 | 1.30E+0         |          |                 |

Table S1

|        |                                                                                                                                                          |      |       |          |          |          |          |          |          |
|--------|----------------------------------------------------------------------------------------------------------------------------------------------------------|------|-------|----------|----------|----------|----------|----------|----------|
| Q87L51 | Aspartokinase II/homoserine dehydrogenase, methionine-sensitive OS=Vibrio parahaemolyticus serotype O3:K6 (strain RIMD 2210633) GN=VP2764 PE=4 SV=1      | 12.0 | 87.8  | 3.20E+06 | 2.90E+06 | 4.40E+06 | 6.70E+06 | 6.20E+06 | 5.90E+06 |
| Q87L52 | Methylenetetrahydrofolate reductase OS=Vibrio parahaemolyticus serotype O3:K6 (strain RIMD 2210633) GN=VP2763 PE=3 SV=1                                  | 20.3 | 33.3  | 7.10E+06 | 1.10E+07 | 1.40E+07 | 1.50E+07 | 1.20E+07 | 2.00E+07 |
| Q87L54 | Phosphoenolpyruvate carboxylase OS=Vibrio parahaemolyticus serotype O3:K6 (strain RIMD 2210633) GN=ppc PE=3 SV=2                                         | 32.6 | 99.2  | 1.00E+07 | 1.50E+07 | 1.30E+07 | 1.90E+07 | 2.00E+07 | 1.90E+07 |
| Q87L55 | N-acetyl-gamma-glutamyl-phosphate reductase OS=Vibrio parahaemolyticus serotype O3:K6 (strain RIMD 2210633) GN=argC PE=3 SV=1                            | 10.2 | 36.2  | 4.20E+06 | 5.40E+06 | 5.70E+06 | 7.80E+06 | 4.70E+06 | 3.80E+06 |
| Q87L56 | Acetylglutamate kinase OS=Vibrio parahaemolyticus serotype O3:K6 (strain RIMD 2210633) GN=argB PE=3 SV=1                                                 | 7.6  | 27.1  |          |          |          |          | 4.30E+06 |          |
| Q87L68 | 3-dehydroquinate synthase OS=Vibrio parahaemolyticus serotype O3:K6 (strain RIMD 2210633) GN=aroB PE=3 SV=1                                              | 12.3 | 40.0  |          |          |          | 5.70E+06 | 5.30E+06 | 5.10E+06 |
| Q87L72 | 3S ribosomal protein S6 OS=Vibrio parahaemolyticus serotype O3:K6 (strain RIMD 2210633) GN=rpsF PE=3 SV=1                                                | 23.7 | 15.0  |          | 7.20E+06 | 8.00E+06 | 8.70E+06 | 7.50E+06 | 9.40E+06 |
| Q87L75 | 50S ribosomal protein L9 OS=Vibrio parahaemolyticus serotype O3:K6 (strain RIMD 2210633) GN=rplL PE=3 SV=1                                               | 40.7 | 15.7  | 2.80E+06 | 9.60E+06 | 1.00E+07 | 1.30E+07 | 1.50E+07 | 1.50E+07 |
| Q87L81 | Glucose-6-phosphate isomerase OS=Vibrio parahaemolyticus serotype O3:K6 (strain RIMD 2210633) GN=pgi PE=3 SV=1                                           | 36.5 | 60.9  | 2.80E+07 | 3.80E+07 | 4.00E+07 | 3.40E+07 | 6.70E+07 | 5.10E+07 |
| Q87L90 | Sulfite reductase [NADPH] flavoprotein alpha-component OS=Vibrio parahaemolyticus serotype O3:K6 (strain RIMD 2210633) GN=rsyd PE=3 SV=1                 | 9.3  | 68.7  | 2.30E+06 | 4.00E+06 | 4.50E+06 | 7.60E+06 | 5.10E+06 | 4.80E+06 |
| Q87L91 | Sulfite reductase [NADPH] hemoprotein beta-component OS=Vibrio parahaemolyticus serotype O3:K6 (strain RIMD 2210633) GN=rsyl PE=3 SV=1                   | 16.4 | 64.8  | 2.90E+06 | 4.90E+06 | 4.30E+06 | 7.60E+06 | 7.10E+06 | 8.00E+06 |
| Q87L96 | Aspartokinase OS=Vibrio parahaemolyticus serotype O3:K6 (strain RIMD 2210633) GN=VP2715 PE=3 SV=1                                                        | 26.0 | 48.8  | 6.80E+06 | 1.40E+07 | 1.00E+07 | 1.80E+07 | 1.70E+07 | 1.50E+07 |
| Q87LA1 | UTP-glucose-1-phosphate uridylyltransferase OS=Vibrio parahaemolyticus serotype O3:K6 (strain RIMD 2210633) GN=VP2711 PE=3 SV=1                          | 4.1  | 32.3  |          |          |          | 3.70E+06 |          | 3.60E+06 |
| Q87LA3 | Single-stranded DNA-binding protein OS=Vibrio parahaemolyticus serotype O3:K6 (strain RIMD 2210633) GN=ssb PE=3 SV=1                                     | 5.7  | 19.6  | 6.20E+06 |          |          |          | 1.20E+07 |          |
| Q87LB4 | Putative V10 pilin OS=Vibrio parahaemolyticus serotype O3:K6 (strain RIMD 2210633) GN=VP2699 PE=4 SV=1                                                   | 26.1 | 16.8  |          |          | 6.50E+06 | 6.70E+06 | 8.50E+06 | 7.40E+06 |
| Q87LD6 | PmbA protein OS=Vibrio parahaemolyticus serotype O3:K6 (strain RIMD 2210633) GN=VP2676 PE=4 SV=1                                                         | 2.5  | 48.2  |          |          |          |          |          |          |
| Q87LF8 | Aspartate carbamoyltransferase OS=Vibrio parahaemolyticus serotype O3:K6 (strain RIMD 2210633) GN=pyrB PE=3 SV=1                                         | 6.8  | 34.5  |          |          | 2.10E+06 |          | 3.00E+06 | 2.30E+06 |
| Q87LF9 | Ornithine carbamoyltransferase OS=Vibrio parahaemolyticus serotype O3:K6 (strain RIMD 2210633) GN=orfF PE=3 SV=1                                         | 26.9 | 37.3  | 1.30E+07 | 1.80E+07 | 1.80E+07 | 2.40E+07 | 3.20E+07 | 2.20E+07 |
| Q87LG6 | Valine-tRNA ligase OS=Vibrio parahaemolyticus serotype O3:K6 (strain RIMD 2210633) GN=valS PE=3 SV=1                                                     | 8.9  | 108.6 | 5.20E+06 | 7.20E+06 | 3.70E+06 | 6.90E+06 | 4.60E+06 | 4.20E+06 |
| Q87LG8 | Proteoblycitol aminopeptidase OS=Vibrio parahaemolyticus serotype O3:K6 (strain RIMD 2210633) GN=ppa PE=3 SV=1                                           | 21.7 | 54.4  | 4.80E+06 | 1.00E+07 | 7.30E+06 | 1.10E+07 | 8.70E+06 | 1.10E+07 |
| Q87LH4 | Decacetylase DA1 OS=Vibrio parahaemolyticus serotype O3:K6 (strain RIMD 2210633) GN=VP2638 PE=4 SV=1                                                     | 5.4  | 47.0  | 6.90E+06 |          |          |          |          |          |
| Q87LH6 | Permease IIC component OS=Vibrio parahaemolyticus serotype O3:K6 (strain RIMD 2210633) GN=VP2636 PE=4 SV=1                                               | 5.6  | 48.7  |          |          |          |          | 1.10E+07 | 4.90E+06 |
| Q87LH8 | 6-phospho-beta-glucosidase OS=Vibrio parahaemolyticus serotype O3:K6 (strain RIMD 2210633) GN=VP2634 PE=3 SV=1                                           | 55.7 | 48.3  |          |          |          | 6.00E+06 | 1.10E+08 | 5.00E+07 |
| Q87LH9 | Carbohydrate decacetylase OS=Vibrio parahaemolyticus serotype O3:K6 (strain RIMD 2210633) GN=VP2633 PE=3 SV=1                                            | 10.4 | 28.0  |          |          |          |          | 8.40E+06 |          |
| Q87LI0 | Transcriptional regulator, LacI family OS=Vibrio parahaemolyticus serotype O3:K6 (strain RIMD 2210633) GN=VP2632 PE=4 SV=1                               | 3.3  | 37.7  |          |          |          |          | 4.90E+06 |          |
| Q87LK1 | Glutathione synthetase OS=Vibrio parahaemolyticus serotype O3:K6 (strain RIMD 2210633) GN=gsb PE=3 SV=1                                                  | 12.7 | 35.2  | 4.10E+06 |          | 5.70E+06 | 6.70E+06 | 1.00E+07 | 9.00E+06 |
| Q87LK6 | S-adenosylmethionine synthase OS=Vibrio parahaemolyticus serotype O3:K6 (strain RIMD 2210633) GN=metK PE=3 SV=1                                          | 32.1 | 42.0  | 4.20E+06 | 1.00E+07 | 1.30E+07 | 1.10E+07 | 1.40E+07 | 1.30E+07 |
| Q87LK8 | Transketolase 1 OS=Vibrio parahaemolyticus serotype O3:K6 (strain RIMD 2210633) GN=tkt1 PE=3 SV=1                                                        | 31.8 | 72.0  | 1.30E+07 | 1.50E+07 | 1.40E+07 | 2.00E+07 | 2.50E+07 | 2.10E+07 |
| Q87LL1 | Phosphoglycerate kinase OS=Vibrio parahaemolyticus serotype O3:K6 (strain RIMD 2210633) GN=pgk PE=3 SV=1                                                 | 53.9 | 40.7  | 2.20E+07 | 3.40E+07 | 4.00E+07 | 5.60E+07 | 6.90E+07 | 5.10E+07 |
| Q87LL2 | Fructose-bisphosphate aldolase, class II OS=Vibrio parahaemolyticus serotype O3:K6 (strain RIMD 2210633) GN=VP2599 PE=4 SV=1                             | 67.9 | 38.9  | 5.10E+07 | 8.80E+07 | 8.30E+07 | 1.00E+08 | 1.20E+08 | 1.00E+08 |
| Q87LL4 | D-3-phosphoglycerate dehydrogenase OS=Vibrio parahaemolyticus serotype O3:K6 (strain RIMD 2210633) GN=VP2593 PE=3 SV=1                                   | 46.1 | 44.7  | 1.60E+07 | 2.90E+07 | 2.80E+07 | 4.30E+07 | 4.80E+07 | 3.80E+07 |
| Q87LL7 | Ribose-5-phosphate isomerase A OS=Vibrio parahaemolyticus serotype O3:K6 (strain RIMD 2210633) GN=rpiA PE=3 SV=1                                         | 5.5  | 23.2  |          |          |          |          |          | 3.00E+06 |
| Q87LM8 | tRNA-modifying protein YgZ OS=Vibrio parahaemolyticus serotype O3:K6 (strain RIMD 2210633) GN=VP2583 PE=3 SV=1                                           | 7.1  | 35.5  |          | 2.60E+06 |          | 4.20E+06 |          | 1.30E+06 |
| Q87LN1 | L-aspartate oxidase OS=Vibrio parahaemolyticus serotype O3:K6 (strain RIMD 2210633) GN=VP2580 PE=3 SV=1                                                  | 11.9 | 60.9  | 2.10E+06 | 1.40E+06 | 2.00E+06 | 3.00E+06 | 8.80E+06 | 5.60E+06 |
| Q87LN7 | Elongation factor 4 OS=Vibrio parahaemolyticus serotype O3:K6 (strain RIMD 2210633) GN=lepa PE=3 SV=1                                                    | 5.7  | 65.9  | 1.80E+06 |          |          | 1.70E+06 |          |          |
| Q87LP9 | CTP synthase OS=Vibrio parahaemolyticus serotype O3:K6 (strain RIMD 2210633) GN=pyrG PE=3 SV=1                                                           | 16.5 | 60.1  | 4.50E+06 | 3.70E+06 | 4.00E+06 | 8.70E+06 | 8.80E+06 | 1.10E+07 |
| Q87LQ0 | Enolase OS=Vibrio parahaemolyticus serotype O3:K6 (strain RIMD 2210633) GN=eno PE=3 SV=1                                                                 | 58.2 | 45.5  | 3.70E+07 | 6.40E+07 | 6.10E+07 | 8.40E+07 | 1.00E+08 | 8.80E+07 |
| Q87LQ8 | RNA polymerase sigma factor RpoS OS=Vibrio parahaemolyticus serotype O3:K6 (strain RIMD 2210633) GN=rpoS PE=3 SV=1                                       | 27.0 | 36.5  |          | 6.70E+06 | 7.80E+06 | 1.10E+07 | 1.40E+07 | 1.60E+07 |
| Q87LR1 | Protein RecA OS=Vibrio parahaemolyticus serotype O3:K6 (strain RIMD 2210633) GN=recA PE=3 SV=1                                                           | 37.2 | 37.4  | 9.10E+06 | 1.30E+07 | 1.10E+07 | 1.00E+07 | 1.80E+07 | 1.20E+07 |
| Q87LR3 | Alanine-tRNA ligase OS=Vibrio parahaemolyticus serotype O3:K6 (strain RIMD 2210633) GN=alaS PE=3 SV=1                                                    | 15.8 | 93.9  | 4.70E+06 | 6.80E+06 | 7.10E+06 | 9.50E+06 | 8.30E+06 | 9.30E+06 |
| Q87LR5 | Carbon storage regulator homolog OS=Vibrio parahaemolyticus serotype O3:K6 (strain RIMD 2210633) GN=csrA PE=3 SV=1                                       | 18.5 | 7.1   |          | 5.00E+06 | 7.90E+06 |          |          |          |
| Q87LR7 | Oxaloacetate decarboxylase, alpha subunit OS=Vibrio parahaemolyticus serotype O3:K6 (strain RIMD 2210633) GN=VP2544 PE=4 SV=1                            | 3.5  | 64.2  |          |          |          | 4.50E+06 |          | 6.10E+06 |
| Q87LS2 | Glutamate-cysteine ligase OS=Vibrio parahaemolyticus serotype O3:K6 (strain RIMD 2210633) GN=gshA PE=3 SV=1                                              | 3.4  | 59.0  |          |          |          | 1.90E+06 |          | 2.00E+06 |
| Q87LS7 | Signal recognition particle protein OS=Vibrio parahaemolyticus serotype O3:K6 (strain RIMD 2210633) GN=frh PE=3 SV=1                                     | 3.0  | 50.2  |          |          | 2.80E+06 | 4.20E+06 |          |          |
| Q87LS8 | 30S ribosomal protein S16 OS=Vibrio parahaemolyticus serotype O3:K6 (strain RIMD 2210633) GN=rpsP PE=3 SV=1                                              | 28.0 | 9.1   |          | 7.70E+06 | 1.30E+07 | 1.50E+07 |          | 1.30E+07 |
| Q87LT0 | tRNA (guanine-N1)-methyltransferase OS=Vibrio parahaemolyticus serotype O3:K6 (strain RIMD 2210633) GN=trmD PE=3 SV=1                                    | 8.5  | 27.8  |          |          |          |          |          | 2.20E+07 |
| Q87LT1 | 50S ribosomal protein L19 OS=Vibrio parahaemolyticus serotype O3:K6 (strain RIMD 2210633) GN=rplS PE=3 SV=2                                              | 47.9 | 13.2  | 1.30E+07 | 1.30E+07 | 2.00E+07 | 1.70E+07 | 1.60E+07 | 1.70E+07 |
| Q87LT2 | Pyruvate dehydrogenase E1 component OS=Vibrio parahaemolyticus serotype O3:K6 (strain RIMD 2210633) GN=VP2519 PE=4 SV=1                                  | 47.5 | 99.6  | 4.30E+07 | 5.70E+07 | 6.50E+07 | 7.00E+07 | 1.10E+08 | 6.70E+07 |
| Q87LU3 | Acetyltransferase component of pyruvate dehydrogenase complex OS=Vibrio parahaemolyticus serotype O3:K6 (strain RIMD 2210633) GN=VP2518 PE=3 SV=1        | 33.8 | 64.9  | 2.20E+07 | 2.90E+07 | 3.40E+07 | 3.10E+07 | 3.30E+07 | 3.50E+07 |
| Q87LW3 | Aconitate hydratase B OS=Vibrio parahaemolyticus serotype O3:K6 (strain RIMD 2210633) GN=VP2495 PE=3 SV=1                                                | 39.2 | 94.0  | 2.40E+07 | 5.00E+07 | 2.30E+07 | 3.00E+07 | 3.20E+07 | 2.60E+07 |
| Q87LW7 | Iron(III) ABC transporter, periplasmic iron-compound-binding protein OS=Vibrio parahaemolyticus serotype O3:K6 (strain RIMD 2210633) GN=VP2491 PE=4 SV=1 | 41.8 | 37.7  | 2.80E+07 | 5.00E+07 | 4.80E+07 | 5.50E+07 | 5.20E+07 | 5.40E+07 |
| Q87LX0 | Putative phosphoglucomutase/phosphomannomutase OS=Vibrio parahaemolyticus serotype O3:K6 (strain RIMD 2210633) GN=VP2488 PE=4 SV=1                       | 14.3 | 52.3  |          |          |          |          |          | 8.60E+06 |
| Q87LX1 | NN'-diacetylchitobiose phosphorylase OS=Vibrio parahaemolyticus serotype O3:K6 (strain RIMD 2210633) GN=VP2487 PE=4 SV=1                                 | 29.8 | 90.0  |          |          |          | 6.20E+06 | 9.40E+06 | 3.00E+07 |
| Q87LX2 | Peptide ABC transporter, periplasmic peptide-binding protein OS=Vibrio parahaemolyticus serotype O3:K6 (strain RIMD 2210633) GN=VP2479 PE=4 SV=1         | 26.8 | 62.9  |          |          |          | 5.70E+06 | 3.50E+07 | 6.90E+07 |
| Q87LZ1 | Outer membrane protein U OS=Vibrio parahaemolyticus serotype O3:K6 (strain RIMD 2210633) GN=ompU PE=3 SV=1                                               | 18.1 | 36.3  | 4.20E+06 | 6.90E+06 | 1.10E+07 | 1.30E+07 | 1.60E+07 | 1.30E+07 |
| Q87LZ7 | Phosphoglucomutase OS=Vibrio parahaemolyticus serotype O3:K6 (strain RIMD 2210633) GN=glmM PE=3 SV=1                                                     | 2.9  | 47.6  |          |          |          | 2.60E+06 |          |          |
| Q87M01 | Transcription termination/antitermination protein NusA OS=Vibrio parahaemolyticus serotype O3:K6 (strain RIMD 2210633) GN=nusA PE=3 SV=1                 | 14.5 | 54.9  | 5.70E+06 | 9.10E+06 | 6.70E+06 | 9.10E+06 | 9.50E+06 | 8.50E+06 |
| Q87M02 | Translation initiation factor IF-2 OS=Vibrio parahaemolyticus serotype O3:K6 (strain RIMD 2210633) GN=infB PE=3 SV=1                                     | 20.8 | 99.3  | 1.20E+07 | 1.50E+07 | 1.60E+07 | 1.80E+07 | 1.60E+07 | 1.80E+07 |
| Q87M06 | Polyribonucleotide nucleotidyltransferase OS=Vibrio parahaemolyticus serotype O3:K6 (strain RIMD 2210633) GN=ppn PE=3 SV=1                               | 39.9 | 76.7  | 1.40E+07 | 1.80E+07 | 1.90E+07 | 2.20E+07 | 2.20E+07 | 2.20E+07 |
| Q87M22 | Deoxyribose-phosphate aldolase OS=Vibrio parahaemolyticus serotype O3:K6 (strain RIMD 2210633) GN=decC PE=3 SV=1                                         | 4.3  | 27.7  | 2.40E+06 | 5.70E+06 | 4.10E+06 | 5.60E+06 |          | 3.90E+06 |
| Q87M25 | Purine nucleoside phosphorylase DcoD-type 1 OS=Vibrio parahaemolyticus serotype O3:K6 (strain RIMD 2210633) GN=dcoD1 PE=3 SV=1                           | 5.0  | 25.9  |          |          |          |          | 4.70E+06 | 2.00E+06 |
| Q87M27 | Phosphoserine phosphatase OS=Vibrio parahaemolyticus serotype O3:K6 (strain RIMD 2210633) GN=VP2431 PE=4 SV=1                                            | 15.0 | 35.8  | 1.50E+06 | 2.90E+06 | 4.10E+06 | 4.30E+06 | 5.00E+06 | 5.10E+06 |
| Q87M30 | Elongation factor G 2 OS=Vibrio parahaemolyticus serotype O3:K6 (strain RIMD 2210633) GN=efuA2 PE=3 SV=1                                                 | 51.7 | 76.3  | 5.20E+07 | 9.40E+07 | 8.50E+07 | 1.20E+08 | 1.20E+08 | 1.20E+08 |
| Q87M78 | 2,3,4,5-tetrahydrodipyrroline-2,6-dicarboxylate N-succinyltransferase OS=Vibrio parahaemolyticus serotype O3:K6 (strain RIMD 2210633) GN=dapD PE=3 SV=1  | 21.0 | 35.6  | 4.20E+06 | 7.80E+06 | 9.00E+06 | 1.00E+07 | 1.90E+07 | 1.50E+07 |
| Q87MB7 | Uncharacterized protein OS=Vibrio parahaemolyticus serotype O3:K6 (strain RIMD 2210633) GN=VP2339 PE=4 SV=1                                              | 8.1  | 27.5  |          |          |          |          |          | 1.30E+07 |
| Q87MC3 | Proline-tRNA ligase OS=Vibrio parahaemolyticus serotype O3:K6 (strain RIMD 2210633) GN=proS PE=3 SV=1                                                    | 23.3 | 63.2  | 5.10E+06 | 7.90E+06 | 5.90E+06 | 8.20E+06 | 1.10E+07 | 9.10E+06 |
| Q87MD7 | Methionine aminopeptidase OS=Vibrio parahaemolyticus serotype O3:K6 (strain RIMD 2210633) GN=map PE=3 SV=1                                               | 5.8  | 32.3  |          |          |          | 8.40E+06 |          |          |
| Q87MD8 | 30S ribosomal protein S2 OS=Vibrio parahaemolyticus serotype O3:K6 (strain RIMD 2210633) GN=rpsB PE=3 SV=1                                               | 43.4 | 26.8  | 8.80E+06 | 1.80E+07 | 2.00E+07 | 2.70E+07 | 1.80E+07 | 2.30E+07 |
| Q87MD9 | Elongation factor Ts OS=Vibrio parahaemolyticus serotype O3:K6 (strain RIMD 2210633) GN=tsf PE=3 SV=1                                                    | 63.7 | 29.8  | 2.60E+07 | 4.60E+07 | 4.60E+07 | 5.60E+07 | 6.80E+07 | 5.70E+07 |
| Q87ME0 | Uridylate kinase OS=Vibrio parahaemolyticus serotype O3:K6 (strain RIMD 2210633) GN=pyrH PE=3 SV=1                                                       | 4.5  | 26.1  |          |          |          |          |          |          |
| Q87MH0 | Phosphoribosylformylglycinamide cyclo-ligase OS=Vibrio parahaemolyticus serotype O3:K6 (strain RIMD 2210633) GN=purM PE=3 SV=1                           | 8.4  | 36.8  |          |          |          | 1.50E+06 | 7.90E+06 |          |
| Q87MI2 | 4-hydroxy-tetrahydrodipicolinate synthase OS=Vibrio parahaemolyticus serotype O3:K6 (strain RIMD 2210633) GN=dapA PE=3 SV=1                              | 36.3 | 31.2  | 5.60E+06 | 1.40E+07 | 1.40E+07 | 1.40E+07 | 1.60E+07 | 1.50E+07 |
| Q87MM9 | Chorismate synthase OS=Vibrio parahaemolyticus serotype O3:K6 (strain RIMD 2210633) GN=aroC PE=3 SV=1                                                    | 6.6  | 39.0  |          | 3.40E+06 | 2.80E+06 | 3.00E+06 |          | 4.50E+06 |
| Q87MN7 | 3-oxoacyl-[acyl-carrier-protein] synthase I OS=Vibrio parahaemolyticus serotype O3:K6 (strain RIMD 2210633) GN=VP2194 PE=3 SV=1                          | 25.3 | 42.6  | 6.10E+06 | 1.50E+08 | 8.80E+06 | 1.20E+08 | 1.40E+07 | 1.30E+07 |
| Q87MN9 | Aspartate-semialdehyde dehydrogenase OS=Vibrio parahaemolyticus serotype O3:K6 (strain RIMD 2210633) GN=asd PE=3 SV=1                                    | 8.0  | 37.2  |          |          |          |          |          |          |



Table S1

|        |                                                                                                                                                       |      |       |          |          |          |          |          |          |          |    |          |
|--------|-------------------------------------------------------------------------------------------------------------------------------------------------------|------|-------|----------|----------|----------|----------|----------|----------|----------|----|----------|
| Q87NC7 | Putative carboxynorspermidine dehydrogenase OS=Vibrio parahaemolyticus serotype O3K6 (strain RIMD 2210633) GN=VP1941 PE=4 SV=1                        | 22   | 46.5  |          |          | 5.20E+06 |          |          |          |          |    | 6.50E+06 |
| Q87NC8 | Carboxynorspermidine/carboxyspermidine decarboxylase OS=Vibrio parahaemolyticus serotype O3K6 (strain RIMD 2210633) GN=VP1940 PE=3 SV=1               | 1.9  | 42.0  |          |          |          |          |          |          |          |    | 8.60E+06 |
| Q87ND1 | CinA-like protein OS=Vibrio parahaemolyticus serotype O3K6 (strain RIMD 2210633) GN=VP1937 PE=3 SV=1                                                  | 2.7  | 45.3  |          |          | 4.50E+06 |          |          | 4.40E+06 |          |    | 3.90E+06 |
| Q87ND4 | Ribonucleoside-diphosphate reductase OS=Vibrio parahaemolyticus serotype O3K6 (strain RIMD 2210633) GN=VP1934 PE=3 SV=1                               | 8.3  | 85.6  | 4.10E+06 | 4.50E+06 |          |          | 4.30E+06 | 7.50E+06 |          |    |          |
| Q87NE3 | DNA gyrase subunit A OS=Vibrio parahaemolyticus serotype O3K6 (strain RIMD 2210633) GN=gyrA PE=3 SV=1                                                 | 17.4 | 97.0  | 1.10E+07 | 1.50E+07 | 1.10E+07 |          | 1.20E+07 | 9.70E+06 | 1.30E+07 |    |          |
| Q87NE7 | GTP cyclohydrolase-2 OS=Vibrio parahaemolyticus serotype O3K6 (strain RIMD 2210633) GN=ribA PE=3 SV=1                                                 | 5.6  | 22.3  |          |          |          |          |          |          |          |    |          |
| Q87NE8 | Aspartate aminotransferase OS=Vibrio parahaemolyticus serotype O3K6 (strain RIMD 2210633) GN=VP1900 PE=3 SV=1                                         | 62.8 | 45.4  | 5.00E+07 | 8.30E+07 | 8.50E+07 | 1.10E+08 | 1.50E+08 | 1.10E+08 |          |    |          |
| Q87NH5 | Asparagine--tRNA ligase OS=Vibrio parahaemolyticus serotype O3K6 (strain RIMD 2210633) GN=asnS PE=3 SV=1                                              | 45.1 | 52.6  | 3.00E+07 | 4.40E+07 | 3.80E+07 | 4.80E+07 | 5.90E+07 | 4.90E+07 |          |    |          |
| Q87NU6 | Succinate--semialdehyde dehydrogenase OS=Vibrio parahaemolyticus serotype O3K6 (strain RIMD 2210633) GN=VP1772 PE=3 SV=1                              | 23.3 | 51.8  |          |          |          |          |          |          |          |    | 4.50E+05 |
| Q87NW7 | Homoserine O--succinyltransferase OS=Vibrio parahaemolyticus serotype O3K6 (strain RIMD 2210633) GN=metA PE=3 SV=1                                    | 3.5  | 36.2  |          |          |          |          |          |          |          |    |          |
| Q87NZ4 | Putative DNA polymerase III, epsilon subunit OS=Vibrio parahaemolyticus serotype O3K6 (strain RIMD 2210633) GN=VP1724 PE=4 SV=1                       | 6.0  | 28.0  |          |          |          |          |          |          |          |    |          |
| Q87P08 | Glucose-6-phosphate 1-dehydrogenase OS=Vibrio parahaemolyticus serotype O3K6 (strain RIMD 2210633) GN=zwf PE=3 SV=1                                   | 4.2  | 57.6  |          | 4.50E+06 |          |          | 5.40E+06 | 6.40E+06 | 4.70E+06 |    |          |
| Q87P10 | 6-phosphogluconate dehydrogenase, decarboxylating OS=Vibrio parahaemolyticus serotype O3K6 (strain RIMD 2210633) GN=VP1708 PE=3 SV=1                  | 27.6 | 52.5  | 7.80E+06 | 1.50E+07 | 1.50E+07 | 1.70E+07 | 2.00E+07 | 1.60E+07 |          |    |          |
| Q87P15 | Aldehyde dehydrogenase OS=Vibrio parahaemolyticus serotype O3K6 (strain RIMD 2210633) GN=VP1703 PE=3 SV=1                                             | 8.1  | 55.7  |          | 6.50E+06 |          |          | 1.00E+07 |          | 4.30E+06 |    |          |
| Q87P20 | Uncharacterized protein OS=Vibrio parahaemolyticus serotype O3K6 (strain RIMD 2210633) GN=VP1698 PE=4 SV=1                                            | 9.3  | 38.5  |          | 3.80E+06 |          | 5.20E+06 | 4.30E+06 | 6.30E+06 | 3.80E+06 |    |          |
| Q87P32 | Adenosine monophosphate-protein transferase VopS OS=Vibrio parahaemolyticus serotype O3K6 (strain RIMD 2210633) GN=vopS PE=1 SV=1                     | 10.6 | 41.7  |          |          |          | 3.60E+06 |          | 5.00E+06 |          |    |          |
| Q87P42 | Putative transcriptional regulator OS=Vibrio parahaemolyticus serotype O3K6 (strain RIMD 2210633) GN=VP1676 PE=4 SV=1                                 | 7.2  | 34.5  |          |          |          |          |          |          |          |    |          |
| Q87P59 | Uncharacterized protein OS=Vibrio parahaemolyticus serotype O3K6 (strain RIMD 2210633) GN=VP1659 PE=4 SV=1                                            | 16.8 | 67.0  | 8.10E+06 | 1.10E+07 | 1.10E+07 | 7.00E+06 | 1.00E+07 | 7.30E+06 |          |    |          |
| Q87P60 | Low calcium response locus protein H OS=Vibrio parahaemolyticus serotype O3K6 (strain RIMD 2210633) GN=VP1658 PE=4 SV=1                               | 16.7 | 18.1  |          | 3.90E+06 |          |          | 2.10E+06 | 4.30E+06 |          |    |          |
| Q87P62 | Putative translocator protein PopD OS=Vibrio parahaemolyticus serotype O3K6 (strain RIMD 2210633) GN=VP1656 PE=4 SV=1                                 | 19.8 | 35.3  | 4.50E+06 | 6.70E+06 | 7.10E+06 | 4.20E+06 |          | 4.70E+06 |          |    |          |
| Q87P63 | Immunoconjugin protein OS=Vibrio parahaemolyticus serotype O3K6 (strain RIMD 2210633) GN=VP1655 PE=4 SV=1                                             | 2.8  | 34.9  | 1.70E+07 | 3.80E+07 |          |          | 2.90E+07 | 3.90E+07 |          |    |          |
| Q87P68 | RNA chaperone ProQ OS=Vibrio parahaemolyticus serotype O3K6 (strain RIMD 2210633) GN=proQ PE=3 SV=1                                                   | 10.0 | 23.2  |          |          |          | 2.90E+06 | 2.80E+06 |          | 6.70E+06 |    |          |
| Q87PB1 | Tail-specific protease OS=Vibrio parahaemolyticus serotype O3K6 (strain RIMD 2210633) GN=VP1606 PE=4 SV=1                                             | 1.2  | 75.6  |          |          |          |          |          |          | 2.70E+06 |    |          |
| Q87PB3 | Aminopeptidase N OS=Vibrio parahaemolyticus serotype O3K6 (strain RIMD 2210633) GN=VP1604 PE=4 SV=1                                                   | 4.1  | 98.4  | 5.00E+05 | 9.90E+05 |          |          |          | 2.70E+06 | 2.20E+06 |    |          |
| Q87PB5 | Putative NAD-glutamate dehydrogenase OS=Vibrio parahaemolyticus serotype O3K6 (strain RIMD 2210633) GN=VP1602 PE=4 SV=1                               | 3.3  | 183.4 | 3.70E+06 | 7.70E+06 |          | 4.30E+06 |          | 4.50E+06 |          |    |          |
| Q87PC5 | 3-hydroxydecanoyl-[acyl-carrier-protein] dehydratase OS=Vibrio parahaemolyticus serotype O3K6 (strain RIMD 2210633) GN=fabA PE=3 SV=1                 | 15.1 | 19.0  | 7.40E+06 | 1.00E+07 | 8.50E+06 | 9.20E+06 | 1.20E+07 | 1.10E+07 |          |    |          |
| Q87PE6 | Uncharacterized protein OS=Vibrio parahaemolyticus serotype O3K6 (strain RIMD 2210633) GN=VP1564 PE=4 SV=1                                            | 24.4 | 56.4  | 5.70E+06 | 9.50E+06 | 5.40E+06 | 1.10E+07 | 1.30E+07 | 1.10E+07 |          |    |          |
| Q87PG6 | Fumarate and nitrate reduction regulatory protein OS=Vibrio parahaemolyticus serotype O3K6 (strain RIMD 2210633) GN=VP1536 PE=4 SV=1                  | 4.4  | 27.8  |          |          |          |          |          |          |          |    |          |
| Q87PH6 | Putrescine-binding periplasmic protein OS=Vibrio parahaemolyticus serotype O3K6 (strain RIMD 2210633) GN=VP1526 PE=3 SV=1                             | 12.4 | 39.7  | 3.20E+05 |          | 9.20E+06 | 1.70E+07 |          |          |          |    |          |
| Q87PK8 | N-acetyl-D-glucosamine kinase OS=Vibrio parahaemolyticus serotype O3K6 (strain RIMD 2210633) GN=mgk PE=3 SV=1                                         | 2.3  | 32.8  |          |          |          |          |          | 2.80E+06 |          |    |          |
| Q87PU8 | Uncharacterized protein OS=Vibrio parahaemolyticus serotype O3K6 (strain RIMD 2210633) GN=VP1403 PE=4 SV=1                                            | 11.4 | 55.5  | 6.90E+06 |          | 9.80E+06 |          |          | 1.10E+07 | 4.10E+06 |    |          |
| Q87PV8 | Putative ClpA/B-type transferase OS=Vibrio parahaemolyticus serotype O3K6 (strain RIMD 2210633) GN=VP1392 PE=3 SV=1                                   | 1.0  | 97.9  |          |          | 1.40E+06 |          |          |          |          |    |          |
| Q87PZ8 | Putative glutathione S-transferase OS=Vibrio parahaemolyticus serotype O3K6 (strain RIMD 2210633) GN=VP1352 PE=3 SV=1                                 | 9.5  | 25.2  |          | 5.90E+06 |          |          |          |          |          |    |          |
| Q87Q42 | Putative oligopeptidase OS=Vibrio parahaemolyticus serotype O3K6 (strain RIMD 2210633) GN=VP1308 PE=4 SV=1                                            | 3.2  | 68.0  |          |          |          | 3.40E+05 | 1.60E+06 |          |          |    |          |
| Q87Q53 | Phosphoribosylglycinamide formyltransferase 2 OS=Vibrio parahaemolyticus serotype O3K6 (strain RIMD 2210633) GN=purT PE=3 SV=1                        | 13.8 | 42.9  |          |          |          |          |          | 3.70E+06 | 2.50E+06 |    |          |
| Q87Q59 | Phenylalanine--tRNA ligase beta subunit OS=Vibrio parahaemolyticus serotype O3K6 (strain RIMD 2210633) GN=pheT PE=3 SV=1                              | 11.1 | 87.0  | 5.70E+06 | 1.20E+07 | 9.30E+06 | 1.00E+08 | 1.10E+07 | 9.70E+06 |          |    |          |
| Q87Q70 | Threonine--tRNA ligase OS=Vibrio parahaemolyticus serotype O3K6 (strain RIMD 2210633) GN=thvS PE=3 SV=1                                               | 13.9 | 73.7  | 4.80E+06 | 8.50E+06 | 8.20E+06 | 1.20E+07 | 1.20E+07 | 1.20E+07 |          |    |          |
| Q87Q81 | Uncharacterized protein OS=Vibrio parahaemolyticus serotype O3K6 (strain RIMD 2210633) GN=VP1289 PE=4 SV=1                                            | 4.4  | 25.3  |          |          |          |          |          | 3.80E+06 |          |    |          |
| Q87Q87 | Phosphoribosylaminoimidazole-succinocarboxamide synthase OS=Vibrio parahaemolyticus serotype O3K6 (strain RIMD 2210633) GN=purC PE=3 SV=1             | 18.5 | 41.0  | 1.80E+06 | 4.20E+06 | 4.80E+06 | 4.70E+06 | 7.30E+06 | 5.60E+06 |          |    |          |
| Q87Q92 | NAD-dependent malic enzyme OS=Vibrio parahaemolyticus serotype O3K6 (strain RIMD 2210633) GN=maeA PE=3 SV=1                                           | 1.8  | 62.3  |          |          |          |          |          | 6.30E+06 |          |    |          |
| Q87Q99 | Thioredoxin reductase OS=Vibrio parahaemolyticus serotype O3K6 (strain RIMD 2210633) GN=VP1251 PE=3 SV=1                                              | 7.8  | 34.5  |          |          |          |          |          | 2.10E+07 |          |    |          |
| Q87QA3 | Phosphoserine aminotransferase OS=Vibrio parahaemolyticus serotype O3K6 (strain RIMD 2210633) GN=serC PE=3 SV=1                                       | 33.5 | 40.2  | 8.60E+06 | 1.50E+07 | 1.40E+07 | 1.90E+07 | 2.30E+07 | 2.00E+07 |          |    |          |
| Q87QB9 | Putative reductase VP1231 OS=Vibrio parahaemolyticus serotype O3K6 (strain RIMD 2210633) GN=VP1231 PE=3 SV=1                                          | 34.3 | 43.9  | 1.30E+07 | 2.00E+07 | 1.60E+07 | 2.30E+07 | 3.00E+07 | 2.50E+07 |          |    |          |
| Q87QG7 | Cystathionine beta-lyase OS=Vibrio parahaemolyticus serotype O3K6 (strain RIMD 2210633) GN=VP1182 PE=3 SV=1                                           | 8.0  | 44.6  | 3.30E+06 | 6.00E+06 | 5.10E+06 | 5.60E+06 | 7.10E+06 | 6.80E+06 |          |    |          |
| Q87QJ9 | Cysteine--tRNA ligase OS=Vibrio parahaemolyticus serotype O3K6 (strain RIMD 2210633) GN=cysS PE=3 SV=1                                                | 11.1 | 52.0  | 1.70E+06 |          | 2.70E+06 | 6.00E+06 | 6.40E+06 | 5.20E+06 |          |    |          |
| Q87QK5 | Histidine biosynthesis bifunctional protein HisE OS=Vibrio parahaemolyticus serotype O3K6 (strain RIMD 2210633) GN=hisI PE=3 SV=1                     | 7.1  | 23.2  |          |          |          |          |          | 2.20E+06 |          |    |          |
| Q87QL0 | Histidinol-phosphate aminotransferase OS=Vibrio parahaemolyticus serotype O3K6 (strain RIMD 2210633) GN=hisC PE=3 SV=1                                | 15.3 | 38.2  | 3.40E+06 | 6.00E+06 | 4.70E+06 | 9.30E+06 | 8.60E+06 | 5.70E+06 |          |    |          |
| Q87QL1 | Histidinol dehydrogenase OS=Vibrio parahaemolyticus serotype O3K6 (strain RIMD 2210633) GN=hisD PE=3 SV=1                                             | 7.7  | 46.1  | 2.00E+06 | 4.20E+06 | 5.00E+06 | 6.00E+06 | 6.30E+06 | 7.60E+06 |          |    |          |
| Q87QL2 | ATP phosphoribosyltransferase OS=Vibrio parahaemolyticus serotype O3K6 (strain RIMD 2210633) GN=hisG PE=3 SV=1                                        | 27.9 | 32.8  | 6.90E+05 | 4.70E+06 | 6.10E+06 | 8.20E+06 | 9.30E+06 | 8.50E+06 |          |    |          |
| Q87QM1 | Adenylylsuccinate lyase OS=Vibrio parahaemolyticus serotype O3K6 (strain RIMD 2210633) GN=VP1128 PE=3 SV=1                                            | 29.8 | 51.4  | 3.90E+06 | 8.80E+06 | 1.30E+07 | 1.40E+07 | 2.10E+07 | 1.40E+07 |          |    |          |
| Q87QP1 | Serine--tRNA ligase OS=Vibrio parahaemolyticus serotype O3K6 (strain RIMD 2210633) GN=serS PE=3 SV=1                                                  | 38.4 | 48.8  | 8.90E+06 | 1.20E+07 | 1.30E+07 | 1.90E+07 | 2.10E+07 | 1.90E+07 |          |    |          |
| Q87QP5 | Leucine-responsive regulatory protein OS=Vibrio parahaemolyticus serotype O3K6 (strain RIMD 2210633) GN=VP1104 PE=4 SV=1                              | 31.1 | 18.8  |          | 7.10E+06 | 6.10E+06 | 8.70E+06 | 8.80E+06 |          |          |    |          |
| Q87QP6 | Alanine dehydrogenase OS=Vibrio parahaemolyticus serotype O3K6 (strain RIMD 2210633) GN=VP1103 PE=3 SV=1                                              | 43.9 | 39.9  | 1.60E+07 | 3.70E+07 | 2.40E+07 | 3.70E+07 | 2.40E+07 | 2.30E+07 |          |    |          |
| Q87QP8 | Cys regulon transcriptional activator OS=Vibrio parahaemolyticus serotype O3K6 (strain RIMD 2210633) GN=VP1101 PE=4 SV=1                              | 3.7  | 36.1  |          |          |          |          |          | 2.50E+06 | 2.00E+06 |    |          |
| Q87QS7 | Putative helicase OS=Vibrio parahaemolyticus serotype O3K6 (strain RIMD 2210633) GN=VP1072 PE=4 SV=1                                                  | 24.4 | 68.7  | 3.90E+06 | 6.80E+06 | 6.60E+06 | 7.60E+06 | 1.00E+07 | 9.70E+06 |          |    |          |
| Q87QT9 | Protein TolB OS=Vibrio parahaemolyticus serotype O3K6 (strain RIMD 2210633) GN=tolB PE=3 SV=1                                                         | 9.3  | 49.8  |          |          | 4.60E+06 | 5.70E+06 | 7.10E+06 | 9.90E+06 |          |    |          |
| Q87QV2 | Aspartate--tRNA ligase OS=Vibrio parahaemolyticus serotype O3K6 (strain RIMD 2210633) GN=aspS PE=3 SV=1                                               | 35.0 | 65.7  | 1.20E+07 | 2.00E+07 | 1.90E+07 | 2.50E+07 | 2.90E+07 | 2.50E+07 |          |    |          |
| Q87QX6 | Glucose-1-phosphate adenylyltransferase 1 OS=Vibrio parahaemolyticus serotype O3K6 (strain RIMD 2210633) GN=glgC1 PE=3 SV=1                           | 52.6 | 45.5  | 1.70E+07 | 2.30E+07 | 2.50E+07 | 3.00E+07 | 3.10E+07 | 3.30E+07 |          |    |          |
| Q87QX7 | DNA topoisomerase 1 OS=Vibrio parahaemolyticus serotype O3K6 (strain RIMD 2210633) GN=topA PE=3 SV=1                                                  | 1.7  | 98.0  |          |          |          |          |          |          | 2.20E+06 |    |          |
| Q87QX9 | 3-phosphoshikimate 1-carboxyvinyltransferase OS=Vibrio parahaemolyticus serotype O3K6 (strain RIMD 2210633) GN=aroA PE=3 SV=1                         | 5.2  | 46.1  |          | 3.70E+06 | 3.40E+06 | 3.70E+06 |          | 4.00E+06 |          |    |          |
| Q87QY4 | ATP-dependent Clp protease, ATP-binding subunit ClpA OS=Vibrio parahaemolyticus serotype O3K6 (strain RIMD 2210633) GN=VP1014 PE=3 SV=1               | 11.1 | 83.3  | 2.10E+06 | 4.10E+06 | 2.60E+06 | 3.50E+06 | 8.10E+06 | 4.50E+06 |          |    |          |
| Q87QY7 | Isocitrate dehydrogenase OS=Vibrio parahaemolyticus serotype O3K6 (strain RIMD 2210633) GN=VP1011 PE=4 SV=1                                           | 53.0 | 80.5  | 3.00E+07 | 4.60E+07 | 3.40E+07 | 3.90E+07 | 4.30E+07 | 3.90E+07 |          |    |          |
| Q87QZ9 | Amino acid ABC transporter, periplasmic amino acid-binding protein OS=Vibrio parahaemolyticus serotype O3K6 (strain RIMD 2210633) GN=VP0989 PE=3 SV=1 | 30.6 | 28.4  | 2.70E+06 | 8.30E+06 | 7.20E+06 | 7.10E+06 | 8.80E+06 | 1.00E+07 |          |    |          |
| Q87R04 | Formate acetyltransferase OS=Vibrio parahaemolyticus serotype O3K6 (strain RIMD 2210633) GN=VP0984 PE=4 SV=1                                          | 60.4 | 84.5  | 4.90E+07 | 5.30E+07 | 6.10E+07 | 8.10E+07 | 1.10E+08 | 9.70E+07 |          |    |          |
| Q87R36 | Uncharacterized protein OS=Vibrio parahaemolyticus serotype O3K6 (strain RIMD 2210633) GN=VP0962 PE=4 SV=1                                            | 17.9 | 43.9  | 2.10E+06 | 4.40E+06 | 1.20E+07 | 8.00E+06 | 1.20E+07 | 9.90E+06 |          |    |          |
| Q87R38 | Uridine phosphorylase OS=Vibrio parahaemolyticus serotype O3K6 (strain RIMD 2210633) GN=VP0960 PE=3 SV=1                                              | 2.8  | 26.9  |          |          |          |          |          |          |          |    |          |
| Q87R78 | DNA-binding protein HU-beta OS=Vibrio parahaemolyticus serotype O3K6 (strain RIMD 2210633) GN=VP0920 PE=3 SV=1                                        | 28.9 | 9.4   | 1.10E+07 | 3.50E+07 | 3.90E+07 | 4.30E+07 | 2.50E+07 | 4.10E+07 |          |    |          |
| Q87R80 | ATP-dependent Clp protease proteolytic subunit OS=Vibrio parahaemolyticus serotype O3K6 (strain RIMD 2210633) GN=clpP PE=3 SV=1                       | 9.0  | 22.0  |          | 1.40E+07 | 1.50E+07 | 1.10E+07 | 1.90E+07 | 1.80E+07 |          |    |          |
| Q87R81 | Trigger factor OS=Vibrio parahaemolyticus serotype O3K6 (strain RIMD 2210633) GN=tig PE=3 SV=1                                                        | 47.2 | 48.2  | 1.40E+07 | 2.50E+07 | 2.70E+07 | 2.90E+07 | 2.60E+07 | 3.30E+07 |          |    |          |
| Q87R87 | C4-dicarboxylate-binding periplasmic protein OS=Vibrio parahaemolyticus serotype O3K6 (strain RIMD 2210633) GN=VP0910 PE=4 SV=1                       | 17.5 | 37.1  | 7.60E+06 | 4.40E+06 | 4.40E+06 | 1.20E+07 | 1.10E+07 | 1.10E+07 |          | </ |          |

Table S1

|         |                                                                                                                                                   |      |       |          |          |          |          |          |          |
|---------|---------------------------------------------------------------------------------------------------------------------------------------------------|------|-------|----------|----------|----------|----------|----------|----------|
| Q87RU5  | 3,4-dihydroxy-2-butanone 4-phosphate synthase OS=Vibrio parahaemolyticus serotype O3:K6 (strain RIMD 2210633) GN=ribB PE=3 SV=1                   | 11.4 | 40.1  | 1.00E+06 | 3.10E+06 | 2.40E+06 | 3.30E+06 | 7.30E+06 | 3.80E+06 |
| Q87RU9  | Gamma-glutamyl phosphate reductase OS=Vibrio parahaemolyticus serotype O3:K6 (strain RIMD 2210633) GN=prpA PE=3 SV=1                              | 14.2 | 44.7  | 1.70E+06 | 5.10E+06 | 2.80E+06 | 5.60E+06 | 6.00E+06 | 5.70E+06 |
| Q87RV5  | Aminoacyl-histidine dipeptidase OS=Vibrio parahaemolyticus serotype O3:K6 (strain RIMD 2210633) GN=VP0671 PE=4 SV=1                               | 4.7  | 53.6  |          |          | 4.90E+06 | 5.30E+06 | 5.70E+06 | 4.10E+06 |
| Q87RV7  | Uncharacterized protein OS=Vibrio parahaemolyticus serotype O3:K6 (strain RIMD 2210633) GN=VP0669 PE=4 SV=1                                       | 26.4 | 39.0  | 3.60E+06 | 7.30E+06 | 9.00E+06 | 8.80E+06 | 1.30E+07 | 1.30E+07 |
| Q87RW0  | Phosphoribosylformylglycinamide synthase OS=Vibrio parahaemolyticus serotype O3:K6 (strain RIMD 2210633) GN=prfL PE=3 SV=1                        | 20.0 | 141.6 | 6.30E+06 | 1.00E+07 | 1.30E+07 | 1.30E+07 | 1.70E+07 | 1.30E+07 |
| Q87RX2  | Chaperone protein DnaJ OS=Vibrio parahaemolyticus serotype O3:K6 (strain RIMD 2210633) GN=dnaJ PE=3 SV=1                                          | 3.1  | 41.0  |          |          | 2.30E+06 |          |          |          |
| Q87RX3  | Chaperone protein DnaK OS=Vibrio parahaemolyticus serotype O3:K6 (strain RIMD 2210633) GN=dnaK PE=3 SV=1                                          | 57.0 | 69.0  | 1.30E+07 | 2.50E+07 | 2.30E+07 | 2.80E+07 | 3.20E+07 | 3.30E+07 |
| Q87RZ5  | Homocysteine synthase OS=Vibrio parahaemolyticus serotype O3:K6 (strain RIMD 2210633) GN=VP0629 PE=3 SV=1                                         | 2.8  | 45.7  |          |          |          | 1.40E+06 |          | 1.10E+06 |
| Q87S07  | GMP synthase [glutamine-hydrolyzing] OS=Vibrio parahaemolyticus serotype O3:K6 (strain RIMD 2210633) GN=guaA PE=3 SV=1                            | 10.4 | 57.6  | 4.40E+06 | 8.60E+06 | 5.80E+06 | 1.30E+07 | 1.50E+07 | 1.10E+07 |
| Q87S08  | Inosine-5'-monophosphate dehydrogenase OS=Vibrio parahaemolyticus serotype O3:K6 (strain RIMD 2210633) GN=guaB PE=3 SV=1                          | 32.2 | 51.9  | 6.60E+06 | 9.70E+06 | 8.60E+06 | 1.30E+07 | 1.60E+07 | 8.90E+06 |
| Q87S12  | GTPase Der OS=Vibrio parahaemolyticus serotype O3:K6 (strain RIMD 2210633) GN=der PE=3 SV=1                                                       | 1.8  | 55.8  |          |          |          |          | 2.60E+06 |          |
| Q87S15  | Histidine-tRNA ligase OS=Vibrio parahaemolyticus serotype O3:K6 (strain RIMD 2210633) GN=hisS PE=3 SV=1                                           | 2.6  | 47.1  |          |          |          |          |          |          |
| Q87S21  | Peptidase B OS=Vibrio parahaemolyticus serotype O3:K6 (strain RIMD 2210633) GN=pepB PE=3 SV=1                                                     | 10.2 | 46.6  | 2.40E+06 | 8.40E+06 | 3.60E+06 | 6.80E+06 | 9.30E+06 | 7.20E+06 |
| Q87S28  | Cysteine desulfurase IscS OS=Vibrio parahaemolyticus serotype O3:K6 (strain RIMD 2210633) GN=iscS PE=3 SV=1                                       | 1.5  | 45.0  |          |          |          |          |          | 2.40E+06 |
| Q87S44  | Antioxidant, AhpC/Tsa family OS=Vibrio parahaemolyticus serotype O3:K6 (strain RIMD 2210633) GN=VP0580 PE=4 SV=1                                  | 43.3 | 22.2  | 1.40E+07 | 4.00E+07 | 3.70E+07 | 4.20E+07 | 4.90E+07 | 4.10E+07 |
| Q87S63  | Chaperone protein ClpB OS=Vibrio parahaemolyticus serotype O3:K6 (strain RIMD 2210633) GN=clpB PE=3 SV=1                                          | 28.8 | 95.8  | 6.90E+06 | 8.60E+06 | 8.90E+06 | 1.40E+07 | 1.80E+07 | 1.30E+07 |
| Q87S68  | Putative sigma-54 modulation protein OS=Vibrio parahaemolyticus serotype O3:K6 (strain RIMD 2210633) GN=VP0556 PE=4 SV=1                          | 8.3  | 12.4  |          |          |          |          |          | 5.90E+06 |
| Q87S69  | Chorismate mutase/prephenate dehydratase OS=Vibrio parahaemolyticus serotype O3:K6 (strain RIMD 2210633) GN=VP0555 PE=4 SV=1                      | 3.1  | 44.2  |          |          |          |          |          | 1.70E+06 |
| Q87S73  | ABC transporter, ATP-binding protein OS=Vibrio parahaemolyticus serotype O3:K6 (strain RIMD 2210633) GN=VP0551 PE=3 SV=1                          | 14.6 | 62.2  | 3.30E+06 | 5.80E+06 | 3.70E+06 | 5.10E+06 | 5.20E+06 | 5.80E+06 |
| Q87S78  | Phospho-2'-dehydro-3'-deoxyheptanate aldolase OS=Vibrio parahaemolyticus serotype O3:K6 (strain RIMD 2210633) GN=VP0546 PE=3 SV=1                 | 6.7  | 39.7  |          | 3.60E+06 |          | 9.10E+06 |          | 4.70E+06 |
| Q87S90  | Isoleucine-tRNA ligase OS=Vibrio parahaemolyticus serotype O3:K6 (strain RIMD 2210633) GN=ileS PE=3 SV=1                                          | 5.8  | 105.2 | 4.70E+06 | 4.30E+06 | 4.70E+06 | 8.20E+06 | 6.60E+06 | 5.30E+06 |
| Q87SA8  | Oxidoreductase Tas, aldo/keto reductase family OS=Vibrio parahaemolyticus serotype O3:K6 (strain RIMD 2210633) GN=VP0516 PE=4 SV=1                | 12.2 | 39.7  |          | 6.60E+06 | 4.10E+06 | 8.50E+06 | 9.10E+06 | 6.60E+06 |
| Q87SB1  | Lysine-tRNA ligase OS=Vibrio parahaemolyticus serotype O3:K6 (strain RIMD 2210633) GN=lysS PE=3 SV=1                                              | 34.9 | 57.5  | 2.70E+07 | 1.80E+07 | 3.70E+07 | 5.10E+07 | 5.70E+07 | 4.50E+07 |
| Q87SCT7 | Autonomous glycol radical cofactor OS=Vibrio parahaemolyticus serotype O3:K6 (strain RIMD 2210633) GN=grcA PE=3 SV=1                              | 38.4 | 13.9  | 5.90E+06 | 8.50E+06 |          | 1.40E+07 | 1.80E+07 | 1.10E+07 |
| Q87SC8  | Threonine synthase OS=Vibrio parahaemolyticus serotype O3:K6 (strain RIMD 2210633) GN=VP0486 PE=4 SV=1                                            | 43.4 | 46.5  | 7.60E+06 | 9.40E+06 | 1.10E+07 | 1.50E+07 | 1.90E+07 | 1.60E+07 |
| Q87SC9  | Homoserine kinase OS=Vibrio parahaemolyticus serotype O3:K6 (strain RIMD 2210633) GN=thrB PE=3 SV=1                                               | 5.3  | 34.4  |          |          |          |          |          | 4.20E+06 |
| Q87SD0  | Aspartokinase I/homoserine dehydrogenase, threonine-sensitive OS=Vibrio parahaemolyticus serotype O3:K6 (strain RIMD 2210633) GN=VP0494 PE=4 SV=1 | 32.2 | 88.4  | 1.60E+07 | 1.90E+07 | 1.70E+07 | 2.10E+07 | 2.50E+07 | 2.10E+07 |
| Q87SD5  | Aerobic respiration control protein FexA OS=Vibrio parahaemolyticus serotype O3:K6 (strain RIMD 2210633) GN=VP0489 PE=4 SV=1                      | 4.6  | 26.9  |          | 5.70E+06 | 5.00E+06 | 5.30E+06 |          | 7.70E+06 |
| Q87SE0  | Glutamate synthase, large subunit OS=Vibrio parahaemolyticus serotype O3:K6 (strain RIMD 2210633) GN=VP0484 PE=4 SV=1                             | 16.3 | 175.2 | 5.80E+06 | 7.40E+06 | 8.70E+06 | 1.40E+07 | 1.10E+07 | 1.20E+07 |
| Q87SE1  | Glutamate synthase, small subunit OS=Vibrio parahaemolyticus serotype O3:K6 (strain RIMD 2210633) GN=VP0483 PE=4 SV=1                             | 10.4 | 53.3  |          |          | 1.10E+06 | 6.20E+06 | 4.40E+06 | 2.70E+06 |
| Q87SE2  | Glutamate synthase, large subunit OS=Vibrio parahaemolyticus serotype O3:K6 (strain RIMD 2210633) GN=VP0482 PE=4 SV=1                             | 10.4 | 162.9 | 7.90E+06 | 6.00E+06 | 7.50E+06 | 8.50E+06 | 4.80E+06 | 4.80E+06 |
| Q87SF3  | Carbamoyl-phosphate synthase large chain OS=Vibrio parahaemolyticus serotype O3:K6 (strain RIMD 2210633) GN=carB PE=3 SV=1                        | 32.2 | 117.8 | 1.00E+07 | 1.40E+07 | 1.50E+07 | 1.90E+07 | 1.90E+07 | 1.80E+07 |
| Q87SF4  | Carbamoyl-phosphate synthase small chain OS=Vibrio parahaemolyticus serotype O3:K6 (strain RIMD 2210633) GN=carA PE=3 SV=1                        | 16.6 | 41.0  | 2.90E+06 | 6.30E+06 | 6.60E+06 | 7.60E+06 | 8.50E+06 | 6.70E+06 |
| Q87SF5  | 4-hydroxy-tetrahydriodipicolinate reductase OS=Vibrio parahaemolyticus serotype O3:K6 (strain RIMD 2210633) GN=dapB PE=3 SV=1                     | 8.6  | 26.6  | 4.90E+06 | 7.30E+06 | 6.20E+06 | 7.20E+06 | 1.10E+07 | 9.20E+06 |
| Q87SF7  | Protein translocase subunit SecA OS=Vibrio parahaemolyticus serotype O3:K6 (strain RIMD 2210633) GN=secA PE=3 SV=1                                | 8.7  | 103.2 | 2.50E+06 | 6.00E+06 | 4.50E+06 | 5.70E+06 | 2.00E+06 | 4.30E+06 |
| Q87SG0  | Clp division protein FtsZ OS=Vibrio parahaemolyticus serotype O3:K6 (strain RIMD 2210633) GN=ftsZ PE=3 SV=1                                       | 22.5 | 42.5  | 7.90E+06 | 1.20E+07 | 1.10E+07 | 1.50E+07 | 1.80E+07 | 1.50E+07 |
| Q87SH9  | Stringent starvation protein A OS=Vibrio parahaemolyticus serotype O3:K6 (strain RIMD 2210633) GN=VP0444 PE=3 SV=1                                | 30.8 | 24.3  | 5.80E+06 | 1.30E+07 | 1.40E+07 | 1.30E+07 | 5.50E+07 | 1.70E+07 |
| Q87S14  | 30S ribosomal protein S9 OS=Vibrio parahaemolyticus serotype O3:K6 (strain RIMD 2210633) GN=rspl PE=3 SV=1                                        | 49.2 | 14.6  | 9.80E+06 | 2.10E+07 | 2.80E+07 | 3.20E+07 | 3.20E+07 | 3.10E+07 |
| Q87S15  | 50S ribosomal protein L13 OS=Vibrio parahaemolyticus serotype O3:K6 (strain RIMD 2210633) GN=rpjM PE=3 SV=1                                       | 54.2 | 16.0  | 7.40E+06 | 7.30E+06 | 1.60E+07 | 2.40E+07 | 1.20E+07 | 2.90E+07 |
| Q87S10  | Protease D0 OS=Vibrio parahaemolyticus serotype O3:K6 (strain RIMD 2210633) GN=VP0433 PE=4 SV=1                                                   | 17.6 | 48.1  | 2.80E+06 | 9.00E+06 | 6.10E+06 | 1.20E+07 | 9.60E+06 | 1.20E+07 |
| Q87S13  | DNA topoisomerase 4 subunit B OS=Vibrio parahaemolyticus serotype O3:K6 (strain RIMD 2210633) GN=parE PE=3 SV=1                                   | 1.9  | 69.5  |          |          |          |          |          | 6.50E+06 |
| Q87SK0  | Glutamate-ammonia ligase adenylyltransferase OS=Vibrio parahaemolyticus serotype O3:K6 (strain RIMD 2210633) GN=glgE PE=3 SV=1                    | 1.3  | 109.1 |          | 2.20E+06 |          |          |          |          |
| Q87SL8  | RNA polymerase sigma factor RpoD OS=Vibrio parahaemolyticus serotype O3:K6 (strain RIMD 2210633) GN=rpoD PE=3 SV=1                                | 11.0 | 70.7  | 8.20E+06 | 1.00E+07 | 9.60E+06 | 1.30E+07 | 1.30E+07 | 1.40E+07 |
| Q87SR3  | Glutamine-fructose-6-phosphate aminotransferase [isomerizing] OS=Vibrio parahaemolyticus serotype O3:K6 (strain RIMD 2210633) GN=glmS PE=3 SV=2   | 31.6 | 66.8  | 2.50E+06 | 1.00E+07 | 1.10E+07 | 1.80E+07 | 1.10E+07 | 2.00E+07 |
| Q87SR6  | Pyruvate kinase OS=Vibrio parahaemolyticus serotype O3:K6 (strain RIMD 2210633) GN=VP0356 PE=3 SV=1                                               | 34.5 | 49.9  | 9.70E+06 | 1.20E+07 | 1.00E+07 | 2.20E+07 | 2.50E+07 | 2.50E+07 |
| Q87RS0  | Acetylactate synthase OS=Vibrio parahaemolyticus serotype O3:K6 (strain RIMD 2210633) GN=VP0352 PE=3 SV=1                                         | 3.5  | 63.0  | 3.90E+06 |          |          | 5.90E+06 |          |          |
| Q87RS7  | 2-isopropylmalate synthase OS=Vibrio parahaemolyticus serotype O3:K6 (strain RIMD 2210633) GN=leuA PE=3 SV=1                                      | 22.3 | 56.1  | 3.40E+06 | 8.00E+06 | 3.00E+06 | 9.90E+06 | 9.00E+06 | 7.70E+06 |
| Q87RS8  | 3-isopropylmalate dehydrogenase OS=Vibrio parahaemolyticus serotype O3:K6 (strain RIMD 2210633) GN=leuB PE=3 SV=1                                 | 39.1 | 39.3  | 5.30E+06 | 1.50E+07 | 1.30E+07 | 1.50E+07 | 1.80E+07 | 1.50E+07 |
| Q87SS9  | 3-isopropylmalate dehydratase large subunit OS=Vibrio parahaemolyticus serotype O3:K6 (strain RIMD 2210633) GN=leuC PE=3 SV=1                     | 6.8  | 50.6  |          |          |          | 1.20E+07 |          | 2.00E+06 |
| Q87SU3  | 50S ribosomal protein L27 OS=Vibrio parahaemolyticus serotype O3:K6 (strain RIMD 2210633) GN=rpjM PE=3 SV=1                                       | 42.4 | 9.2   |          | 5.80E+06 | 9.90E+06 | 1.00E+07 | 4.60E+06 | 1.30E+07 |
| Q87SU4  | 50S ribosomal protein L21 OS=Vibrio parahaemolyticus serotype O3:K6 (strain RIMD 2210633) GN=rpjJ PE=3 SV=1                                       | 60.2 | 11.5  | 4.30E+06 | 1.20E+07 | 1.60E+07 | 1.90E+07 | 1.30E+07 | 1.80E+07 |
| Q87SU7  | Malate dehydrogenase OS=Vibrio parahaemolyticus serotype O3:K6 (strain RIMD 2210633) GN=mdh PE=3 SV=1                                             | 75.2 | 32.2  | 2.80E+07 | 5.80E+07 | 4.60E+07 | 5.80E+07 | 5.70E+07 | 4.80E+07 |
| Q87SV0  | Immunoglobulin protein OS=Vibrio parahaemolyticus serotype O3:K6 (strain RIMD 2210633) GN=VP0323 PE=4 SV=1                                        | 46.3 | 34.5  | 2.80E+07 | 5.00E+07 | 4.90E+07 | 4.70E+07 | 5.60E+07 | 5.60E+07 |
| Q87SW0  | Fructose-1,6-bisphosphatase class 1 OS=Vibrio parahaemolyticus serotype O3:K6 (strain RIMD 2210633) GN=fbp PE=3 SV=1                              | 29.0 | 37.3  | 6.50E+06 | 1.90E+07 | 1.20E+07 | 1.20E+07 | 1.40E+07 | 7.90E+06 |
| Q87SX0  | Uncharacterized protein OS=Vibrio parahaemolyticus serotype O3:K6 (strain RIMD 2210633) GN=VP0302 PE=4 SV=1                                       | 3.8  | 23.3  | 6.40E+06 | 1.20E+07 | 1.00E+07 | 1.30E+07 | 1.80E+07 | 1.30E+07 |
| Q87SX9  | Sulfate adenylyltransferase subunit 1 OS=Vibrio parahaemolyticus serotype O3:K6 (strain RIMD 2210633) GN=cysN PE=3 SV=1                           | 27.1 | 52.6  | 6.50E+06 | 9.80E+06 | 9.30E+06 | 1.50E+07 | 1.70E+07 | 1.20E+07 |
| Q87SY0  | Sulfate adenylyltransferase subunit 2 OS=Vibrio parahaemolyticus serotype O3:K6 (strain RIMD 2210633) GN=cysD PE=3 SV=1                           | 8.9  | 35.0  |          |          |          | 6.50E+06 | 7.10E+06 | 8.00E+06 |
| Q87SY2  | 2',3'-cyclic-nucleotide 2'-phosphodiesterase OS=Vibrio parahaemolyticus serotype O3:K6 (strain RIMD 2210633) GN=VP0290 PE=3 SV=1                  | 4.9  | 72.1  |          | 3.10E+06 |          | 4.30E+06 | 1.20E+07 | 3.90E+06 |
| Q87SY9  | 50S ribosomal protein L17 OS=Vibrio parahaemolyticus serotype O3:K6 (strain RIMD 2210633) GN=rpjQ PE=3 SV=1                                       | 44.4 | 14.2  |          | 1.30E+07 | 1.60E+07 | 1.70E+07 | 2.00E+07 | 1.30E+07 |
| Q87SZ0  | DNA-directed RNA polymerase subunit alpha OS=Vibrio parahaemolyticus serotype O3:K6 (strain RIMD 2210633) GN=rpoA PE=3 SV=1                       | 33.6 | 36.5  | 1.00E+07 | 2.20E+07 | 2.20E+07 | 2.00E+07 | 2.90E+07 | 2.50E+07 |
| Q87SZ1  | 30S ribosomal protein S4 OS=Vibrio parahaemolyticus serotype O3:K6 (strain RIMD 2210633) GN=rspsD PE=3 SV=1                                       | 50.0 | 23.3  | 1.80E+07 | 3.00E+07 | 3.50E+07 | 4.40E+07 | 4.20E+07 | 4.80E+07 |
| Q87SZ2  | 30S ribosomal protein S13 OS=Vibrio parahaemolyticus serotype O3:K6 (strain RIMD 2210633) GN=rspsM PE=3 SV=1                                      | 56.8 | 13.3  | 7.30E+06 | 1.70E+07 | 2.60E+07 | 2.70E+07 | 2.30E+07 | 2.90E+07 |
| Q87SZ4  | 50S ribosomal protein L15 OS=Vibrio parahaemolyticus serotype O3:K6 (strain RIMD 2210633) GN=VP0323 PE=4 SV=1                                     | 34.0 | 14.9  | 6.90E+06 | 8.30E+06 | 1.00E+07 | 2.00E+07 | 1.70E+07 | 1.50E+07 |
| Q87SZ5  | 50S ribosomal protein L30 OS=Vibrio parahaemolyticus serotype O3:K6 (strain RIMD 2210633) GN=rspsM PE=3 SV=1                                      | 24.1 | 6.6   |          |          |          |          |          | 6.40E+06 |
| Q87SZ6  | 30S ribosomal protein S5 OS=Vibrio parahaemolyticus serotype O3:K6 (strain RIMD 2210633) GN=rspsE PE=3 SV=1                                       | 59.5 | 17.6  | 9.30E+06 | 2.40E+07 | 3.40E+07 | 3.70E+07 | 3.60E+07 | 3.90E+07 |
| Q87SZ7  | 50S ribosomal protein L18 OS=Vibrio parahaemolyticus serotype O3:K6 (strain RIMD 2210633) GN=rpjR PE=3 SV=1                                       | 56.4 | 12.6  | 6.20E+06 | 1.20E+07 | 1.50E+07 | 1.30E+07 | 2.00E+07 | 2.30E+07 |
| Q87SZ8  | 50S ribosomal protein L6 OS=Vibrio parahaemolyticus serotype O3:K6 (strain RIMD 2210633) GN=rpjF PE=3 SV=1                                        | 72.3 | 18.8  | 6.70E+06 | 1.70E+07 | 2.20E+07 | 2.70E+07 | 1.90E+07 | 3.00E+07 |
| Q87SZ9  | 30S ribosomal protein S8 OS=Vibrio parahaemolyticus serotype O3:K6 (strain RIMD 2210633) GN=rspl PE=3 SV=1                                        | 23.8 | 14.0  | 7.20E+06 | 1.90E+07 | 2.70E+07 | 1.90E+07 | 2.40E+07 | 2.50E+07 |
| Q87T00  | 30S ribosomal protein S14 OS=Vibrio parahaemolyticus serotype O3:K6 (strain RIMD 2210633) GN=rsnE PE=3 SV=1                                       | 6.9  | 11.4  |          |          | 6.10E+06 | 6.30E+06 |          | 9.00E+06 |
| Q87T01  | 50S ribosomal protein L5 OS=Vibrio parahaemolyticus serotype O3:K6 (strain RIMD 2210633) GN=rpjE PE=3 SV=1                                        | 76.0 | 20.1  | 1.20E+07 | 2.30E+07 | 3.10E+07 | 3.90E+07 | 4.10E+07 | 3.60E+07 |
| Q87T02  | 50S ribosomal protein L24 OS=Vibrio parahaemolyticus serotype O3:K6 (strain RIMD 2210633) GN=rpjX PE=3 SV=1                                       | 20.0 | 11.2  | 7.40E+06 | 5.00E+06 | 7.10E+06 | 1.90E+07 |          | 1.00E+07 |
| Q87T03  | 50S ribosomal protein L14 OS=Vibrio parahaemolyticus serotype O3:K6 (strain RIMD 2210633) GN=rpjN PE=3 SV=1                                       | 33.3 | 13.6  | 5.50E+06 | 1.10E+07 | 1.30E+07 | 1.60E+07 | 1.40E+07 | 1.80E+07 |
| Q87T04  | 30S ribosomal protein S17 OS=Vibrio                                                                                                               |      |       |          |          |          |          |          |          |



Table S1

| Accession                                    | Description                                                                                                                                                               | Coverage    | MW [kDa] | Control  | GloNAo   | GloN     | (GloNAo)2 | (GloN)2  | GloNAo-GloN |  |
|----------------------------------------------|---------------------------------------------------------------------------------------------------------------------------------------------------------------------------|-------------|----------|----------|----------|----------|-----------|----------|-------------|--|
| Q87TE8                                       | Glutamine synthetase OS=Vibrio parahaemolyticus serotype O3:K6 (strain RIMD 2210633) GN=VP0121 PE=3 SV=1                                                                  | 54.4        | 51.5     | 6.40E+07 | 9.20E+07 | 8.80E+07 | 1.30E+08  | 1.20E+08 | 1.20E+08    |  |
| Q87TQ2                                       | DNA polymerase I OS=Vibrio parahaemolyticus serotype O3:K6 (strain RIMD 2210633) GN=VP0107 PE=3 SV=1                                                                      | 3.0         | 103.1    | 3.20E+06 | 2.10E+06 | 2.20E+06 |           |          |             |  |
| Q87TQ5                                       | Delta-aminolevulinic acid dehydratase OS=Vibrio parahaemolyticus serotype O3:K6 (strain RIMD 2210633) GN=VP0104 PE=3 SV=1                                                 | 12.2        | 39.2     | 3.40E+06 | 7.30E+06 | 7.40E+06 | 1.00E+07  | 1.00E+07 | 9.10E+06    |  |
| Q87TJ9                                       | Oligopeptidase A OS=Vibrio parahaemolyticus serotype O3:K6 (strain RIMD 2210633) GN=VP0070 PE=3 SV=1                                                                      | 20.3        | 76.9     | 9.60E+06 | 3.70E+07 | 3.90E+07 | 5.00E+07  | 6.70E+07 | 5.40E+07    |  |
| Q87TK0                                       | Ribosomal RNA large subunit methyltransferase J OS=Vibrio parahaemolyticus serotype O3:K6 (strain RIMD 2210633) GN=rlnM PE=3 SV=1                                         | 7.2         | 32.2     |          |          |          |           |          |             |  |
| Q87TK1                                       | Glutathione reductase OS=Vibrio parahaemolyticus serotype O3:K6 (strain RIMD 2210633) GN=VP0068 PE=3 SV=1                                                                 | 13.2        | 49.2     | 6.30E+06 | 1.80E+07 | 9.60E+06 | 1.10E+07  | 3.00E+07 | 2.10E+07    |  |
| Q87TM1                                       | Peptide ABC transporter, periplasmic peptide-binding protein OS=Vibrio parahaemolyticus serotype O3:K6 (strain RIMD 2210633) GN=VP0048 PE=4 SV=1                          | 49.9        | 57.4     | 4.10E+07 | 7.40E+07 | 6.40E+07 | 7.80E+07  | 7.70E+07 | 7.30E+07    |  |
| Q87TN4                                       | Ketyl-acyl reductoisomerase OS=Vibrio parahaemolyticus serotype O3:K6 (strain RIMD 2210633) GN=ivC PE=3 SV=1                                                              | 51.0        | 54.7     | 3.20E+07 | 5.30E+07 | 4.60E+07 | 5.80E+07  | 9.00E+07 | 6.50E+07    |  |
| Q87TP7                                       | Glycine-tRNA ligase alpha subunit OS=Vibrio parahaemolyticus serotype O3:K6 (strain RIMD 2210633) GN=glyQ PE=3 SV=1                                                       | 8.5         | 34.9     |          | 5.10E+06 | 5.00E+06 |           |          | 5.20E+06    |  |
| Q87TP8                                       | Glycine-tRNA ligase beta subunit OS=Vibrio parahaemolyticus serotype O3:K6 (strain RIMD 2210633) GN=glyS PE=3 SV=1                                                        | 28.3        | 76.2     | 6.00E+06 | 9.20E+06 | 8.90E+06 | 1.10E+07  | 1.50E+07 | 1.10E+07    |  |
| Q87ALY5                                      | Cyclic AMP receptor protein OS=Vibrio parahaemolyticus serotype O3:K6 (strain RIMD 2210633) GN=VP2793 PE=4 SV=1                                                           | 51.0        | 23.7     | 1.30E+07 | 2.60E+07 | 3.20E+07 | 3.80E+07  | 4.30E+07 | 3.20E+07    |  |
| Q87LX8                                       | BiP OS=Vibrio parahaemolyticus GN=biP PE=1 SV=1                                                                                                                           | 21.2        | 66.9     | 5.80E+06 | 8.10E+06 | 4.80E+06 | 1.30E+07  | 1.10E+07 | 7.50E+06    |  |
| Q87LP5                                       | 60 kDa chaperonin 1 OS=Vibrio parahaemolyticus serotype O3:K6 (strain RIMD 2210633) GN=groL1 PE=3 SV=2                                                                    | 44.6        | 57.5     | 1.80E+07 | 4.10E+07 | 4.20E+07 | 5.00E+07  | 6.70E+07 | 5.50E+07    |  |
| <b>1st Experiment (Insoluble Fraction)</b>   |                                                                                                                                                                           |             |          |          |          |          |           |          |             |  |
| Accession                                    | Description                                                                                                                                                               | Coverage    | MW [kDa] | Control  | GloNAo   | GloN     | (GloNAo)2 | (GloN)2  | GloNAo-GloN |  |
| O50286                                       | Dihydrodipicolyl dehydrogenase OS=Vibrio parahaemolyticus serotype O3:K6 (strain RIMD 2210633) GN=lpd PE=3 SV=2                                                           | 4.84210526  | 50.956   | 1.00E+06 | 3.40E+06 |          |           |          | 8.30E+05    |  |
| P59494                                       | Maltoporin OS=Vibrio parahaemolyticus serotype O3:K6 (strain RIMD 2210633) GN=lamB PE=3 SV=1                                                                              | 30.5555556  | 46.933   | 5.00E+07 | 5.90E+07 | 3.90E+07 |           | 4.30E+07 | 3.50E+07    |  |
| Q87T75                                       | Elongation factor Tu OS=Vibrio parahaemolyticus serotype O3:K6 (strain RIMD 2210633) GN=tuFA PE=3 SV=1                                                                    | 4.06091371  | 43.125   |          |          |          |           |          | 3.70E+06    |  |
| Q87FM2                                       | Ferric siderophore receptor homolog OS=Vibrio parahaemolyticus serotype O3:K6 (strain RIMD 2210633) GN=VPA1657 PE=3 SV=1                                                  | 10.1769912  | 74.942   | 5.00E+06 | 8.10E+06 | 7.90E+06 |           | 4.40E+06 | 1.00E+07    |  |
| Q87FM3                                       | Ferric vibrioferrin receptor OS=Vibrio parahaemolyticus serotype O3:K6 (strain RIMD 2210633) GN=VPA1656 PE=3 SV=1                                                         | 5.05617978  | 78.834   | 2.50E+06 | 5.30E+06 | 3.40E+06 |           | 4.50E+06 | 4.80E+06    |  |
| Q87G18                                       | L-lactate dehydrogenase OS=Vibrio parahaemolyticus serotype O3:K6 (strain RIMD 2210633) GN=ldh PE=3 SV=1                                                                  | 9.2348285   | 41.373   | 5.60E+06 |          | 3.90E+06 |           | 2.20E+06 | 3.70E+06    |  |
| Q87GK7                                       | Uncharacterized protein OS=Vibrio parahaemolyticus serotype O3:K6 (strain RIMD 2210633) GN=VPA1308 PE=4 SV=1                                                              | 17.3684211  | 42.312   | 7.60E+06 | 1.40E+07 | 1.20E+07 |           | 7.60E+06 | 1.30E+07    |  |
| Q87GW2                                       | Uncharacterized protein OS=Vibrio parahaemolyticus serotype O3:K6 (strain RIMD 2210633) GN=VPA1203 PE=4 SV=1                                                              | 12.173913   | 13.13    |          |          |          |           |          | 2.60E+06    |  |
| Q87H4                                        | Ferric aerobactin receptor OS=Vibrio parahaemolyticus serotype O3:K6 (strain RIMD 2210633) GN=VPA0979 PE=3 SV=1                                                           | 1.65517241  | 79.175   |          |          | 2.60E+06 |           |          |             |  |
| Q87HP1                                       | NAD(P) transhydrogenase subunit alpha OS=Vibrio parahaemolyticus serotype O3:K6 (strain RIMD 2210633) GN=VPA0922 PE=3 SV=1                                                | 4.44015444  | 54.772   |          | 2.70E+06 |          |           |          | 3.30E+06    |  |
| Q87HS4                                       | Heme transport protein HtaA OS=Vibrio parahaemolyticus serotype O3:K6 (strain RIMD 2210633) GN=VPA0882 PE=3 SV=1                                                          | 2.88600289  | 77.294   | 5.20E+06 | 6.30E+06 | 4.40E+06 |           | 6.90E+06 | 5.20E+06    |  |
| Q87JD5                                       | Putative outer membrane protein OmpW OS=Vibrio parahaemolyticus serotype O3:K6 (strain RIMD 2210633) GN=VPA0318 PE=4 SV=1                                                 | 4.65116279  | 28.131   | 3.70E+06 | 3.80E+06 | 2.10E+06 |           |          | 4.70E+06    |  |
| Q87JT2                                       | Putative outer membrane protein O3:K6 (strain RIMD 2210633) GN=VPA0166 PE=4 SV=1                                                                                          | 11.4613181  | 37.95    | 1.80E+07 | 1.50E+07 | 1.20E+07 |           | 1.70E+07 | 1.50E+07    |  |
| Q87K02                                       | Putative outer membrane protein OmpW OS=Vibrio parahaemolyticus serotype O3:K6 (strain RIMD 2210633) GN=VPA0096 PE=4 SV=1                                                 | 6.54205607  | 23.453   |          | 3.40E+06 | 1.90E+06 |           | 2.50E+06 | 3.10E+06    |  |
| Q87K33                                       | Putative LysR-family transcriptional regulatory protein OS=Vibrio parahaemolyticus serotype O3:K6 (strain RIMD 2210633) GN=VPA0065 PE=4 SV=1                              | 3.38983051  | 33.123   |          |          |          |           |          |             |  |
| Q87KA6                                       | ATP synthase subunit alpha OS=Vibrio parahaemolyticus serotype O3:K6 (strain RIMD 2210633) GN=atpA PE=3 SV=1                                                              | 6.50095602  | 56.601   | 1.80E+06 |          |          |           |          | 2.90E+06    |  |
| Q87KA8                                       | ATP synthase subunit beta OS=Vibrio parahaemolyticus serotype O3:K6 (strain RIMD 2210633) GN=atpB PE=3 SV=1                                                               | 3.21199143  | 50.664   |          | 1.70E+06 |          |           |          |             |  |
| Q87KQ1                                       | 50S ribosomal protein L1 OS=Vibrio parahaemolyticus serotype O3:K6 (strain RIMD 2210633) GN=rplA PE=3 SV=1                                                                | 10.7296137  | 24.676   | 1.80E+06 | 2.60E+06 |          |           |          |             |  |
| Q87L75                                       | 50S ribosomal protein L9 OS=Vibrio parahaemolyticus serotype O3:K6 (strain RIMD 2210633) GN=rplL PE=3 SV=1                                                                | 7.33333333  | 15.699   | 1.40E+06 |          |          |           |          | 2.80E+06    |  |
| Q87LB4                                       | Putative V10 pilin OS=Vibrio parahaemolyticus serotype O3:K6 (strain RIMD 2210633) GN=VP2698 PE=4 SV=1                                                                    | 25.4545455  | 16.796   | 1.10E+07 | 1.20E+07 |          |           | 3.80E+06 | 1.10E+07    |  |
| Q87LH6                                       | Permease IIC component OS=Vibrio parahaemolyticus serotype O3:K6 (strain RIMD 2210633) GN=VP2636 PE=4 SV=1                                                                | 4.2955928   | 48.725   |          |          |          |           | 1.20E+07 | 8.90E+06    |  |
| Q87LR7                                       | Oxaloacetate decarboxylase, alpha subunit OS=Vibrio parahaemolyticus serotype O3:K6 (strain RIMD 2210633) GN=VP2544 PE=4 SV=1                                             | 5.37815126  | 64.235   |          |          |          |           | 3.70E+06 |             |  |
| Q87LZ2                                       | Pyruvate dehydrogenase E1 component OS=Vibrio parahaemolyticus serotype O3:K6 (strain RIMD 2210633) GN=VP2519 PE=4 SV=1                                                   | 1.24013529  | 99.601   |          | 2.60E+06 | 1.70E+06 |           | 2.90E+06 | 1.90E+06    |  |
| Q87LU3                                       | Acetyltransferase component of pyruvate dehydrogenase complex OS=Vibrio parahaemolyticus serotype O3:K6 (strain RIMD 2210633) GN=VP2518 PE=3 SV=1                         | 1.75438596  | 64.93    |          | 3.50E+06 |          |           | 3.10E+06 |             |  |
| Q87LZ1                                       | Outer membrane protein U OS=Vibrio parahaemolyticus serotype O3:K6 (strain RIMD 2210633) GN=ompU PE=3 SV=1                                                                | 13.0563798  | 36.263   | 1.50E+07 | 1.30E+07 | 1.40E+07 |           | 1.00E+07 | 1.20E+07    |  |
| Q87LZ5                                       | ATP-dependent zinc metalloprotease FtsH OS=Vibrio parahaemolyticus serotype O3:K6 (strain RIMD 2210633) GN=ftsH PE=3 SV=1                                                 | 1.66163142  | 72.936   |          | 3.00E+06 |          |           |          |             |  |
| Q87MY5                                       | Oligopeptide ABC transporter, periplasmic oligopeptide-binding protein OS=Vibrio parahaemolyticus serotype O3:K6 (strain RIMD 2210633) GN=VP2091 PE=4 SV=1                | 6.07899461  | 62.342   | 2.00E+06 | 3.80E+06 | 2.90E+06 |           | 6.20E+06 | 4.00E+06    |  |
| Q87N29                                       | PTS system, glucose-specific IIBC component OS=Vibrio parahaemolyticus serotype O3:K6 (strain RIMD 2210633) GN=VP2046 PE=4 SV=1                                           | 5.25210084  | 49.407   | 1.00E+07 | 1.10E+07 | 6.80E+06 |           | 5.00E+06 | 7.90E+06    |  |
| Q87N45                                       | 30S ribosomal protein S1 OS=Vibrio parahaemolyticus serotype O3:K6 (strain RIMD 2210633) GN=VP2030 PE=3 SV=1                                                              | 5.57553957  | 60.905   |          | 2.60E+06 |          |           |          |             |  |
| Q87O78                                       | Peptidoglycan-associated lipoprotein OS=Vibrio parahaemolyticus serotype O3:K6 (strain RIMD 2210633) GN=VP1061 PE=3 SV=1                                                  | 6.89655172  | 18.701   |          |          |          |           | 3.30E+06 | 5.70E+06    |  |
| Q87R04                                       | Formate acetyltransferase OS=Vibrio parahaemolyticus serotype O3:K6 (strain RIMD 2210633) GN=VP0994 PE=4 SV=1                                                             | 1.71503958  | 84.466   |          | 5.80E+05 |          |           |          |             |  |
| Q87R36                                       | Uncharacterized protein OS=Vibrio parahaemolyticus serotype O3:K6 (strain RIMD 2210633) GN=VP0962 PE=4 SV=1                                                               | 3.10808029  | 43.935   | 1.40E+07 |          |          |           | 2.70E+07 | 1.20E+07    |  |
| Q87RE9                                       | Dihydrodipicolylsuccinyltransferase component of 2-oxoglutarate dehydrogenase complex OS=Vibrio parahaemolyticus serotype O3:K6 (strain RIMD 2210633) GN=VP0848 PE=3 SV=1 | 9.72568579  | 43.675   | 2.60E+06 | 2.40E+06 | 1.70E+06 |           | 2.10E+06 | 2.90E+06    |  |
| Q87RG5                                       | PTS system, N-acetylglucosamine-specific IIBC component OS=Vibrio parahaemolyticus serotype O3:K6 (strain RIMD 2210633) GN=VP0831 PE=4 SV=1                               | 3.25047801  | 54.543   |          | 3.00E+06 | 3.40E+06 |           | 5.30E+06 |             |  |
| Q87RL8                                       | Putative chitoporin OS=Vibrio parahaemolyticus serotype O3:K6 (strain RIMD 2210633) GN=VP0760 PE=4 SV=1                                                                   | 9.91957105  | 40.764   |          |          |          |           |          | 1.50E+07    |  |
| Q87RS3                                       | Lipoprotein OS=Vibrio parahaemolyticus serotype O3:K6 (strain RIMD 2210633) GN=VP0704 PE=3 SV=1                                                                           | 14.49811431 | 29.052   | 5.20E+06 | 4.00E+06 | 4.20E+06 |           | 4.30E+06 | 8.90E+06    |  |
| Q87S84                                       | Putative carbon starvation protein A OS=Vibrio parahaemolyticus serotype O3:K6 (strain RIMD 2210633) GN=VP0540 PE=4 SV=1                                                  | 4.85829956  | 53.283   | 3.30E+06 |          |          |           |          | 3.00E+06    |  |
| Q87S21                                       | 30S ribosomal protein S4 OS=Vibrio parahaemolyticus serotype O3:K6 (strain RIMD 2210633) GN=rpsD PE=3 SV=1                                                                | 6.83982304  | 23.319   |          |          |          |           |          | 2.40E+06    |  |
| Q87S28                                       | 50S ribosomal protein L6 OS=Vibrio parahaemolyticus serotype O3:K6 (strain RIMD 2210633) GN=rplF PE=3 SV=1                                                                | 12.99435003 | 18.767   | 1.70E+06 | 2.20E+06 |          |           | 1.90E+06 | 1.60E+06    |  |
| Q87T01                                       | 50S ribosomal protein L5 OS=Vibrio parahaemolyticus serotype O3:K6 (strain RIMD 2210633) GN=rplE PE=3 SV=1                                                                | 4.66273774  | 20.118   |          |          |          |           |          | 1.80E+06    |  |
| Q87T07                                       | 30S ribosomal protein S3 OS=Vibrio parahaemolyticus serotype O3:K6 (strain RIMD 2210633) GN=rpsC PE=3 SV=1                                                                | 6.03448276  | 25.565   |          |          |          |           |          | 1.50E+06    |  |
| Q87T13                                       | 50S ribosomal protein L3 OS=Vibrio parahaemolyticus serotype O3:K6 (strain RIMD 2210633) GN=rplC PE=3 SV=1                                                                | 4.784889    | 22.36    |          | 3.70E+06 |          |           | 2.50E+06 |             |  |
| Q87TA4                                       | Putative TolR OS=Vibrio parahaemolyticus serotype O3:K6 (strain RIMD 2210633) GN=VP0166 PE=3 SV=1                                                                         | 2.20750552  | 49.324   |          | 1.80E+06 |          |           |          |             |  |
| Q87TE8                                       | Glutamine synthetase OS=Vibrio parahaemolyticus serotype O3:K6 (strain RIMD 2210633) GN=VP0121 PE=3 SV=1                                                                  | 3.41151386  | 51.451   |          | 4.50E+06 |          |           | 2.10E+06 | 3.00E+06    |  |
| Q87TM2                                       | Peptide ABC transporter, ATP-binding protein OS=Vibrio parahaemolyticus serotype O3:K6 (strain RIMD 2210633) GN=VP0047 PE=3 SV=1                                          | 2.45183888  | 63.65    |          | 6.60E+05 |          |           | 7.10E+05 |             |  |
| Q87LP5                                       | 60 kDa chaperonin 1 OS=Vibrio parahaemolyticus serotype O3:K6 (strain RIMD 2210633) GN=groL1 PE=3 SV=2                                                                    | 3.10786106  | 57.537   |          |          |          |           |          | 7.80E+05    |  |
| <b>2nd Experiment (Supernatant Fraction)</b> |                                                                                                                                                                           |             |          |          |          |          |           |          |             |  |
| Accession                                    | Description                                                                                                                                                               | Coverage    | MW [kDa] | Control  | GloNAo   | GloN     | (GloNAo)2 | (GloN)2  | GloNAo-GloN |  |
| AJUEM1                                       | Transhydrogenase alpha subunit (Fragment) OS=Vibrio parahaemolyticus GN=prtA PE=4 SV=1                                                                                    | 32.2        | 15.5     | 5.90E+06 | 1.10E+07 | 9.90E+06 | 6.40E+06  | 9.60E+06 | 1.10E+07    |  |
| AJUEQ6                                       | Dihydro-oxotase (Fragment) OS=Vibrio parahaemolyticus GN=pyrC PE=3 SV=1                                                                                                   | 9.8         | 17.8     | 3.80E+06 | 6.40E+06 |          |           | 7.90E+06 | 8.70E+06    |  |
| AJUE7T                                       | Protein RecA (Fragment) OS=Vibrio parahaemolyticus GN=rcaA PE=3 SV=1                                                                                                      | 4.5         | 26.0     |          | 1.70E+06 | 2.30E+06 | 9.60E+05  |          |             |  |
| A9Q6J2                                       | Protein RecA (Fragment) OS=Vibrio parahaemolyticus GN=rcaA PE=3 SV=1                                                                                                      | 5.2         | 22.4     |          | 1.70E+06 | 2.30E+06 | 9.60E+05  |          |             |  |
| H6BAH9                                       | Thrombolytic hemolysin (Fragment) OS=Vibrio parahaemolyticus GN=thl PE=4 SV=1                                                                                             | 10.8        | 13.6     | 4.80E+07 |          |          |           |          |             |  |
| O50286                                       | Dihydrodipicolyl dehydrogenase OS=Vibrio parahaemolyticus serotype O3:K6 (strain RIMD 2210633) GN=lpd PE=3 SV=2                                                           | 57.5        | 51.0     | 4.10E+07 | 4.40E+07 | 3.60E+07 | 2.20E+07  | 4.90E+07 | 4.90E+07    |  |
| O87081                                       | Polar flagellin F OS=Vibrio parahaemolyticus serotype O3:K6 (strain RIMD 2210633) GN=flaB PE=3 SV=2                                                                       | 5.6         | 40.5     | 4.70E+07 | 8.40E+07 | 7.70E+07 | 7.60E+07  | 7.20E+07 | 1.10E+08    |  |
| POA2W2                                       | Acyl carrier protein OS=Vibrio parahaemolyticus serotype O3:K6 (strain RIMD 2210633) GN=accP PE=3 SV=2                                                                    | 18.2        | 8.5      | 2.40E+07 | 2.40E+07 | 2.40E+07 |           |          |             |  |
| POA308                                       | ATP synthase subunit c OS=Vibrio parahaemolyticus serotype O3:K6 (strain RIMD 2210633) GN=atpC PE=3 SV=1                                                                  | 21.4        | 8.6      | 7.30E+07 | 3.60E+07 | 3.60E+07 | 4.80E+07  | 5.60E+07 | 5.40E+07    |  |
| POA481                                       | 50S ribosomal protein L20 OS=Vibrio parahaemolyticus serotype O3:K6 (strain RIMD 2210633) GN=rplJ PE=3 SV=1                                                               | 23.1        | 13.4     | 1.70E+07 | 1.20E+07 | 1.60E+07 | 8.70E+06  | 1.40E+07 | 2.10E+07    |  |
| P19249                                       | Thrombolytic direct hemolysin 1 OS=Vibrio parahaemolyticus serotype O3:K6 (strain RIMD 2210633) GN=ldh1 PE=1 SV=2                                                         | 24.3        | 21.3     | 8.70E+06 | 1.30E+07 | 1.80E+07 | 1.40E+07  | 1.50E+07 | 2.60E+07    |  |
| P19250                                       | Thrombolytic direct hemolysin 2 OS=Vibrio parahaemolyticus serotype O3:K6 (strain RIMD 2210633) GN=ldh2 PE=1 SV=2                                                         | 41.3        | 21.5     | 6.40E+07 | 6.10E+07 | 8.10E+07 | 3.90E+07  | 7.40E+07 | 9.90E+07    |  |
| P22089                                       | Anthrax toxin component 1 OS=Vibrio parahaemolyticus serotype O3:K6 (strain RIMD 2210633) GN=trpE PE=3 SV=2                                                               | 3.9         | 59.7     | 2.80E+06 |          | 4.20E+06 |           | 3.60E+06 | 3.50E+06    |  |
| P22848                                       | 5'-nucleotidase OS=Vibrio parahaemolyticus serotype O3:K6 (strain RIMD 2210633) GN=ntuA PE=3 SV=2                                                                         | 2.1         | 62.1     | 1.50E+07 | 1.50E+07 | 1.20E+07 | 1.10E+07  | 1.30E+07 | 2.00E+07    |  |
| P40605                                       | Protein Hrk OS=Vibrio parahaemolyticus serotype O3:K6 (strain RIMD 2210633) GN=hrk PE=3 SV=1                                                                              | 4.0         | 44.2     | 2.70E+06 |          |          |           |          |             |  |
| P59494                                       | Maltoporin OS=Vibrio parahaemolyticus serotype O3:K6 (strain RIMD 2210                                                                                                    |             |          |          |          |          |           |          |             |  |

Table S1

|        |                                                                                                                                                          |      |       |          |          |          |          |          |          |
|--------|----------------------------------------------------------------------------------------------------------------------------------------------------------|------|-------|----------|----------|----------|----------|----------|----------|
| Q87FG9 | 4-alpha-glucanotransferase OS=Vibrio parahaemolyticus serotype O3K6 (strain RIMD 2210633) GN=VPA1619 PE=3 SV=1                                           | 28.2 | 81.8  | 2.10E+07 | 1.70E+07 | 2.30E+07 | 1.00E+07 | 2.90E+07 | 2.50E+07 |
| Q87FT0 | GlcNAc-binding protein A OS=Vibrio parahaemolyticus serotype O3K6 (strain RIMD 2210633) GN=ygbA PE=3 SV=1                                                | 61.0 | 53.6  | 1.50E+08 | 1.70E+08 | 2.30E+08 | 1.50E+08 | 2.50E+08 | 3.00E+08 |
| Q87G07 | ScrA (Aminotransferase) OS=Vibrio parahaemolyticus serotype O3K6 (strain RIMD 2210633) GN=VPA1513 PE=3 SV=1                                              | 45.3 | 52.8  | 1.30E+08 | 1.70E+08 | 1.10E+08 | 1.30E+08 | 1.80E+08 | 1.90E+08 |
| Q87G09 | 2-amino-3-ketobutyrate coenzyme A ligase OS=Vibrio parahaemolyticus serotype O3K6 (strain RIMD 2210633) GN=hbl PE=3 SV=1                                 | 2.8  | 43.1  |          | 3.90E+06 | 4.30E+06 |          |          |          |
| Q87G18 | L-lactate dehydrogenase OS=Vibrio parahaemolyticus serotype O3K6 (strain RIMD 2210633) GN=ldh PE=3 SV=1                                                  | 19.8 | 41.4  | 1.70E+07 | 1.40E+07 | 1.30E+07 | 4.20E+06 | 9.20E+06 | 7.50E+06 |
| Q87G21 | Prolyl endopeptidase OS=Vibrio parahaemolyticus serotype O3K6 (strain RIMD 2210633) GN=VPA1496 PE=4 SV=1                                                 | 23.0 | 76.0  | 1.20E+07 | 1.50E+07 | 1.10E+07 | 9.20E+06 | 1.10E+07 | 1.70E+07 |
| Q87G30 | Putative acetyltransferase OS=Vibrio parahaemolyticus serotype O3K6 (strain RIMD 2210633) GN=VPA1487 PE=4 SV=1                                           | 7.2  | 18.5  |          | 1.80E+06 |          |          |          |          |
| Q87G42 | Purine nucleoside phosphorylase DeoD-type 2 OS=Vibrio parahaemolyticus serotype O3K6 (strain RIMD 2210633) GN=deoD2 PE=3 SV=1                            | 21.6 | 25.7  | 2.60E+07 | 2.50E+07 | 2.10E+07 | 1.60E+07 | 2.20E+07 | 2.70E+07 |
| Q87G48 | Outer membrane lipoprotein OS=Vibrio parahaemolyticus serotype O3K6 (strain RIMD 2210633) GN=VPA1469 PE=4 SV=1                                           | 57.1 | 8.7   | 3.40E+07 | 4.80E+07 | 3.20E+07 | 2.30E+07 | 3.60E+07 | 3.10E+07 |
| Q87G50 | Protease II OS=Vibrio parahaemolyticus serotype O3K6 (strain RIMD 2210633) GN=VPA1467 PE=4 SV=1                                                          | 22.2 | 75.1  | 8.30E+06 | 6.60E+06 | 1.50E+07 | 9.90E+06 | 1.50E+07 | 4.10E+07 |
| Q87G52 | Uncharacterized protein OS=Vibrio parahaemolyticus serotype O3K6 (strain RIMD 2210633) GN=VPA1465 PE=4 SV=1                                              | 25.9 | 84.5  | 1.30E+07 | 1.50E+07 | 1.80E+07 | 1.80E+07 | 2.20E+07 | 2.50E+07 |
| Q87G53 | Uncharacterized protein OS=Vibrio parahaemolyticus serotype O3K6 (strain RIMD 2210633) GN=VPA1464 PE=4 SV=1                                              | 5.0  | 52.2  |          |          |          |          |          | 2.70E+06 |
| Q87G54 | Uncharacterized protein OS=Vibrio parahaemolyticus serotype O3K6 (strain RIMD 2210633) GN=VPA1463 PE=4 SV=1                                              | 18.6 | 20.8  |          |          |          |          | 1.30E+07 | 1.10E+07 |
| Q87G82 | Putative iron(III) compound receptor OS=Vibrio parahaemolyticus serotype O3K6 (strain RIMD 2210633) GN=VPA1435 PE=3 SV=1                                 | 2.3  | 77.0  | 2.90E+06 | 4.50E+06 |          |          |          |          |
| Q87G89 | Azurin OS=Vibrio parahaemolyticus serotype O3K6 (strain RIMD 2210633) GN=VPA1428 PE=4 SV=1                                                               | 66.7 | 15.8  | 1.40E+08 | 1.80E+08 | 1.20E+08 | 1.10E+08 | 9.60E+07 | 1.20E+08 |
| Q87GB6 | Maltose ABC transporter, periplasmic maltose-binding protein OS=Vibrio parahaemolyticus serotype O3K6 (strain RIMD 2210633) GN=VPA1401 PE=4 SV=1         | 76.0 | 42.1  | 3.70E+08 | 3.00E+08 | 3.00E+08 | 2.20E+08 | 3.40E+08 | 3.50E+08 |
| Q87GC0 | Acyl-CoA thioester hydrolase-related protein OS=Vibrio parahaemolyticus serotype O3K6 (strain RIMD 2210633) GN=VPA1397 PE=4 SV=1                         | 8.1  | 17.7  | 7.00E+06 |          | 1.10E+07 |          |          |          |
| Q87G0E | Uncharacterized protein OS=Vibrio parahaemolyticus serotype O3K6 (strain RIMD 2210633) GN=VPA1376 PE=4 SV=1                                              | 1.8  | 165.8 | 5.20E+06 | 2.50E+06 |          |          | 4.10E+06 | 5.70E+06 |
| Q87GK7 | Uncharacterized protein OS=Vibrio parahaemolyticus serotype O3K6 (strain RIMD 2210633) GN=VPA1308 PE=4 SV=1                                              | 29.5 | 42.3  | 6.60E+07 | 6.00E+07 | 5.20E+07 | 3.70E+07 | 5.80E+07 | 5.00E+07 |
| Q87GL7 | Putative glutathione S-transferase OS=Vibrio parahaemolyticus serotype O3K6 (strain RIMD 2210633) GN=VPA1298 PE=4 SV=1                                   | 2.5  | 32.2  |          |          |          |          |          |          |
| Q87GN7 | Uncharacterized protein OS=Vibrio parahaemolyticus serotype O3K6 (strain RIMD 2210633) GN=VPA1278 PE=4 SV=1                                              | 5.4  | 13.0  | 1.30E+07 | 1.30E+07 | 8.20E+06 | 8.30E+06 |          |          |
| Q87GS2 | Putative cytosine deaminase OS=Vibrio parahaemolyticus serotype O3K6 (strain RIMD 2210633) GN=VPA1243 PE=4 SV=1                                          | 2.6  | 48.0  |          | 2.90E+06 |          | 1.80E+06 |          |          |
| Q87GW1 | Acetyl-CoA acetyltransferase OS=Vibrio parahaemolyticus serotype O3K6 (strain RIMD 2210633) GN=VPA1204 PE=3 SV=1                                         | 21.4 | 41.5  | 1.10E+07 | 8.00E+06 | 1.10E+07 | 5.10E+06 | 8.80E+06 | 7.40E+06 |
| Q87GW2 | Uncharacterized protein OS=Vibrio parahaemolyticus serotype O3K6 (strain RIMD 2210633) GN=VPA1203 PE=4 SV=1                                              | 25.2 | 13.1  | 8.20E+06 | 3.70E+06 | 3.20E+06 |          |          |          |
| Q87GW6 | Periplasmic nitrate reductase OS=Vibrio parahaemolyticus serotype O3K6 (strain RIMD 2210633) GN=narX PE=3 SV=1                                           | 1.7  | 92.9  |          |          | 3.50E+06 |          |          |          |
| Q87GX9 | Outer membrane protein OmpA OS=Vibrio parahaemolyticus serotype O3K6 (strain RIMD 2210633) GN=VPA1186 PE=3 SV=1                                          | 23.7 | 36.0  | 4.70E+07 | 4.40E+07 | 4.50E+07 | 3.00E+07 | 7.30E+06 | 8.00E+06 |
| Q87GY0 | Phospho-2-dehydro-3-deoxyheptone aldolase OS=Vibrio parahaemolyticus serotype O3K6 (strain RIMD 2210633) GN=VPA1185 PE=3 SV=1                            | 2.0  | 38.3  | 9.30E+07 | 5.50E+07 |          |          |          |          |
| Q87GY4 | Transketolase 2 OS=Vibrio parahaemolyticus serotype O3K6 (strain RIMD 2210633) GN=tk2 PE=3 SV=1                                                          | 5.7  | 72.0  | 1.70E+07 | 1.30E+07 | 1.10E+07 |          | 7.60E+06 | 1.30E+07 |
| Q87GY5 | Transaldolase OS=Vibrio parahaemolyticus serotype O3K6 (strain RIMD 2210633) GN=tal PE=3 SV=1                                                            | 69.3 | 34.8  | 4.80E+07 | 4.40E+07 | 5.70E+07 | 4.10E+07 | 6.80E+07 | 7.20E+07 |
| Q87H23 | Putative chitinase A OS=Vibrio parahaemolyticus serotype O3K6 (strain RIMD 2210633) GN=VPA1177 PE=3 SV=1                                                 | 4.7  | 47.9  |          |          |          |          | 5.30E+06 | 7.00E+06 |
| Q87H02 | Oxidoreductase, aldo/keto reductase 2 family OS=Vibrio parahaemolyticus serotype O3K6 (strain RIMD 2210633) GN=VPA1163 PE=4 SV=1                         | 9.9  | 34.0  | 8.40E+06 | 8.10E+06 | 7.50E+06 | 4.80E+06 | 1.00E+07 | 8.90E+06 |
| Q87H16 | Uncharacterized protein OS=Vibrio parahaemolyticus serotype O3K6 (strain RIMD 2210633) GN=VPA1149 PE=4 SV=1                                              | 2.7  | 45.3  |          | 3.50E+06 | 2.20E+06 |          |          |          |
| Q87HF0 | Putative succinate dehydrogenase subunit Sdh OS=Vibrio parahaemolyticus serotype O3K6 (strain RIMD 2210633) GN=VPA1015 PE=4 SV=1                         | 3.6  | 36.2  | 4.30E+06 | 3.20E+06 |          |          |          |          |
| Q87HF4 | L-allo-threonine aldolase OS=Vibrio parahaemolyticus serotype O3K6 (strain RIMD 2210633) GN=VPA1011 PE=4 SV=1                                            | 29.6 | 38.1  | 2.10E+07 | 2.00E+07 | 2.00E+07 | 2.00E+07 | 3.40E+07 | 3.30E+07 |
| Q87HG0 | D-lactate dehydrogenase OS=Vibrio parahaemolyticus serotype O3K6 (strain RIMD 2210633) GN=VPA1005 PE=4 SV=1                                              | 9.9  | 64.3  | 9.90E+06 | 6.20E+06 | 6.40E+06 | 3.90E+06 | 6.30E+06 |          |
| Q87HG6 | Alpha-amylase OS=Vibrio parahaemolyticus serotype O3K6 (strain RIMD 2210633) GN=VPA0999 PE=4 SV=1                                                        | 36.1 | 58.4  | 5.20E+07 | 5.40E+07 | 2.90E+07 | 7.20E+07 | 4.30E+07 | 6.50E+07 |
| Q87HI4 | Ferriic aerobactin receptor OS=Vibrio parahaemolyticus serotype O3K6 (strain RIMD 2210633) GN=VPA0979 PE=3 SV=1                                          | 40.1 | 79.2  | 6.80E+07 | 6.80E+07 | 6.80E+07 | 4.60E+07 | 7.20E+07 | 6.00E+07 |
| Q87HL0 | Putative biofilm-associated surface protein OS=Vibrio parahaemolyticus serotype O3K6 (strain RIMD 2210633) GN=VPA0953 PE=4 SV=1                          | 0.4  | 247.1 | 1.40E+07 | 1.40E+07 | 1.30E+07 | 1.00E+07 | 1.10E+07 | 1.10E+07 |
| Q87HM1 | Uncharacterized protein OS=Vibrio parahaemolyticus serotype O3K6 (strain RIMD 2210633) GN=VPA0942 PE=4 SV=1                                              | 4.8  | 33.0  |          | 3.90E+06 |          |          | 5.00E+06 | 5.10E+06 |
| Q87HM7 | Amino acid biosynthesis aminotransferase OS=Vibrio parahaemolyticus serotype O3K6 (strain RIMD 2210633) GN=VPA0936 PE=4 SV=1                             | 32.9 | 43.7  | 2.10E+07 | 1.60E+07 | 1.70E+07 | 1.20E+07 | 2.20E+07 | 2.30E+07 |
| Q87HM8 | Uncharacterized protein OS=Vibrio parahaemolyticus serotype O3K6 (strain RIMD 2210633) GN=VPA0935 PE=4 SV=1                                              | 18.1 | 25.7  | 3.10E+06 | 4.60E+06 | 2.60E+06 | 2.70E+06 | 3.10E+06 | 3.30E+06 |
| Q87HM9 | Uncharacterized protein OS=Vibrio parahaemolyticus serotype O3K6 (strain RIMD 2210633) GN=VPA0934 PE=4 SV=1                                              | 3.9  | 22.6  | 6.10E+06 | 7.80E+06 |          |          |          | 5.50E+06 |
| Q87HP1 | NAD(P) transhydrogenase subunit alpha OS=Vibrio parahaemolyticus serotype O3K6 (strain RIMD 2210633) GN=VPA0922 PE=3 SV=1                                | 30.7 | 54.8  | 1.80E+07 | 2.50E+07 | 2.10E+07 | 1.50E+07 | 1.10E+07 | 1.90E+07 |
| Q87HP2 | NAD(P) transhydrogenase subunit beta OS=Vibrio parahaemolyticus serotype O3K6 (strain RIMD 2210633) GN=VPA0921 PE=3 SV=1                                 | 12.7 | 48.6  | 1.80E+07 | 1.90E+07 | 1.30E+07 | 1.10E+07 | 1.20E+07 | 2.00E+07 |
| Q87HS4 | Heme transport protein Hta OS=Vibrio parahaemolyticus serotype O3K6 (strain RIMD 2210633) GN=VPA0882 PE=3 SV=1                                           | 72.0 | 77.3  | 1.50E+08 | 1.80E+08 | 1.50E+08 | 1.10E+08 | 1.40E+08 | 1.20E+08 |
| Q87HV6 | UPF0312 protein VPA0850 OS=Vibrio parahaemolyticus serotype O3K6 (strain RIMD 2210633) GN=VPA0850 PE=3 SV=1                                              | 34.9 | 20.3  | 5.30E+07 | 4.90E+07 | 4.40E+07 | 3.30E+07 | 3.30E+07 | 4.70E+07 |
| Q87HX4 | Chitinotransferase OS=Vibrio parahaemolyticus serotype O3K6 (strain RIMD 2210633) GN=VPA0832 PE=4 SV=1                                                   | 51.6 | 111.8 | 3.70E+06 | 6.80E+06 | 6.80E+07 | 2.80E+07 | 3.50E+06 | 5.10E+06 |
| Q87HY6 | Amino acid ABC transporter, periplasmic amino acid-binding protein OS=Vibrio parahaemolyticus serotype O3K6 (strain RIMD 2210633) GN=VPA0820 PE=4 SV=1   | 6.2  | 30.6  |          |          | 5.70E+06 | 8.80E+06 | 1.60E+07 | 1.30E+07 |
| Q87HZ6 | Uncharacterized protein OS=Vibrio parahaemolyticus serotype O3K6 (strain RIMD 2210633) GN=VPA0810 PE=4 SV=1                                              | 24.6 | 21.1  | 6.80E+06 | 1.10E+07 |          | 8.00E+06 | 8.20E+06 | 3.30E+06 |
| Q87I01 | Aminomethyltransferase OS=Vibrio parahaemolyticus serotype O3K6 (strain RIMD 2210633) GN=VPA0805 PE=3 SV=1                                               | 11.6 | 40.3  | 1.10E+07 | 8.40E+06 | 1.10E+07 | 6.20E+06 | 1.20E+07 | 7.30E+06 |
| Q87I05 | Glycine dehydrogenase (decarboxylating) OS=Vibrio parahaemolyticus serotype O3K6 (strain RIMD 2210633) GN=gcvp PE=3 SV=1                                 | 6.2  | 104.1 | 9.30E+06 | 1.20E+07 |          |          | 1.30E+07 | 1.10E+07 |
| Q87I11 | Acetyl-coenzyme A carboxylase carboxyl transferase subunit beta 2 OS=Vibrio parahaemolyticus serotype O3K6 (strain RIMD 2210633) GN=accD2 PE=3 SV=1      | 2.4  | 32.1  |          | 8.60E+06 | 6.60E+06 | 4.40E+06 | 5.80E+06 | 6.50E+06 |
| Q87ID3 | Methylglyoxal synthase OS=Vibrio parahaemolyticus serotype O3K6 (strain RIMD 2210633) GN=mgsA PE=3 SV=1                                                  | 15.2 | 17.0  | 8.50E+06 | 7.30E+06 | 1.40E+07 |          | 9.70E+06 |          |
| Q87IE2 | Putative Fe-regulated protein B OS=Vibrio parahaemolyticus serotype O3K6 (strain RIMD 2210633) GN=VPA0864 PE=3 SV=1                                      | 30.1 | 74.2  | 2.10E+07 | 2.40E+07 | 1.20E+07 | 1.80E+07 | 2.20E+07 | 2.20E+07 |
| Q87IE9 | Iron(III) ABC transporter, periplasmic iron-compound-binding protein OS=Vibrio parahaemolyticus serotype O3K6 (strain RIMD 2210633) GN=VPA0857 PE=4 SV=1 | 53.6 | 33.5  | 3.60E+07 | 3.80E+07 | 4.80E+07 | 3.40E+07 | 3.90E+07 | 5.60E+07 |
| Q87IG9 | Arginine ABC transporter, periplasmic arginine-binding protein OS=Vibrio parahaemolyticus serotype O3K6 (strain RIMD 2210633) GN=VPA0837 PE=3 SV=1       | 44.9 | 27.3  | 4.00E+07 | 4.00E+07 | 4.40E+07 | 2.70E+07 | 3.00E+07 | 4.30E+07 |
| Q87JL5 | Acetate kinase 2 OS=Vibrio parahaemolyticus serotype O3K6 (strain RIMD 2210633) GN=ackA2 PE=3 SV=1                                                       | 31.2 | 42.6  | 3.40E+07 | 3.50E+07 | 3.60E+07 | 2.20E+07 | 4.30E+07 | 4.50E+07 |
| Q87JP0 | Alcohol dehydrogenase OS=Vibrio parahaemolyticus serotype O3K6 (strain RIMD 2210633) GN=VPA0566 PE=4 SV=1                                                | 5.5  | 40.2  | 4.80E+06 | 2.80E+06 |          |          |          |          |
| Q87JP4 | Putative chemotaxis transducer OS=Vibrio parahaemolyticus serotype O3K6 (strain RIMD 2210633) GN=VPA0562 PE=4 SV=1                                       | 3.4  | 73.9  |          |          |          | 7.60E+05 |          |          |
| Q87JQ4 | Cold shock DNA-binding domain protein OS=Vibrio parahaemolyticus serotype O3K6 (strain RIMD 2210633) GN=VPA0552 PE=4 SV=1                                | 26.1 | 7.5   | 7.40E+06 | 8.60E+06 |          |          |          |          |
| Q87JS1 | Putative phosphonmuntase OS=Vibrio parahaemolyticus serotype O3K6 (strain RIMD 2210633) GN=VPA0535 PE=3 SV=1                                             | 47.2 | 61.6  | 3.30E+07 | 3.50E+07 | 4.10E+07 | 2.80E+07 | 4.70E+07 | 4.70E+07 |
| Q87JS9 | Outer membrane protein N, non-specific porin OS=Vibrio parahaemolyticus serotype O3K6 (strain RIMD 2210633) GN=VPA0527 PE=4 SV=1                         | 4.3  | 37.8  |          | 4.50E+06 |          |          |          |          |
| Q87KX8 | Putative oxidoreductase OS=Vibrio parahaemolyticus serotype O3K6 (strain RIMD 2210633) GN=VPA0478 PE=4 SV=1                                              | 4.7  | 51.0  |          |          |          |          |          |          |
| Q87KY2 | Spermidine n1-acetyltransferase OS=Vibrio parahaemolyticus serotype O3K6 (strain RIMD 2210633) GN=VPA0474 PE=4 SV=1                                      | 6.8  | 21.1  |          |          |          |          |          | 3.00E+06 |
| Q87YV8 | Prolyl endopeptidase OS=Vibrio parahaemolyticus serotype O3K6 (strain RIMD 2210633) GN=VPA0468 PE=4 SV=1                                                 | 6.1  | 84.2  | 2.60E+06 | 1.50E+06 | 3.90E+06 |          | 4.70E+06 | 3.90E+06 |
| Q87J24 | Uncharacterized protein OS=Vibrio parahaemolyticus serotype O3K6 (strain RIMD 2210633) GN=VPA0429 PE=4 SV=1                                              | 6.8  | 20.2  | 4.90E+06 | 6.20E+06 | 7.30E+06 | 3.30E+06 | 7.00E+06 | 1.00E+07 |
| Q87J25 | Uncharacterized protein OS=Vibrio parahaemolyticus serotype O3K6 (strain RIMD 2210633) GN=VPA0428 PE=4 SV=1                                              | 6.4  | 19.1  |          |          |          |          |          | 9.60E+06 |
| Q87J30 | Hemin ABC transporter, periplasmic hemin-binding protein Hmb OS=Vibrio parahaemolyticus serotype O3K6 (strain RIMD 2210633) GN=VPA0423 PE=4 SV=1         | 10.0 | 30.3  |          |          |          |          | 2.40E+06 | 3.60E+06 |
| Q87J46 | Dihydroorotate OS=Vibrio parahaemolyticus serotype O3K6 (strain RIMD 2210633) GN=pyrC PE=3 SV=1                                                          | 4.7  | 37.8  | 3.80E+06 | 6.40E+06 |          |          | 7.90E+06 | 8.70E+06 |
| Q87J78 | Adenylosuccinate synthetase OS=Vibrio parahaemolyticus serotype O3K6 (strain RIMD 2210633) GN=psrA PE=3 SV=1                                             | 1.9  | 45.6  |          |          |          | 5.10E+06 |          | 1.00E+07 |
| Q87J81 | Phosphoenolpyruvate synthase OS=Vibrio parahaemolyticus serotype O3K6 (strain RIMD 2210633) GN=VPA0372 PE=3 SV=1                                         | 48.3 | 88.1  | 6.50E+07 | 5.70E+07 | 5.40E+07 | 2.80E+07 | 6.40E+07 | 4.40E+07 |
| Q87J86 | Putrescine-binding protein OS=Vibrio parahaemolyticus serotype O3K6 (strain RIMD 2210633) GN=VPA0367 PE=3 SV=1                                           | 50.3 | 38.7  | 8.00E+07 | 7.70E+07 | 9.00E+07 | 6.30E+07 | 9.50E+07 | 1.00E+08 |
| Q87JD5 | Putative outer membrane protein OmpV OS=Vibrio parahaemolyticus serotype O3K6 (strain RIMD 2210633) GN=VPA0318 PE=4 SV=1                                 | 40.3 | 28.1  | 4.50E+07 | 4.90E+07 | 3.40E+07 | 3.80E+07 | 6.30E+07 | 4.90E+07 |
| Q87JG6 | 60 kDa chaperonin 2 OS=Vibrio parahaemolyticus serotype O3K6 (strain RIMD 2210633) GN=groL2 PE=3 SV=1                                                    | 2.3  | 56.3  |          |          |          |          |          |          |
| Q87JK1 | Putative outer membrane protein OmpA OS=Vibrio parahaemolyticus serotype O3K6 (strain RIMD 2210633) GN=VPA0248 PE=3 SV=1                                 | 11.4 | 35.5  |          | 7.70E+06 |          |          |          |          |



|         |                                                                                                                                                   |      |       |          |          |          |          |          |          |
|---------|---------------------------------------------------------------------------------------------------------------------------------------------------|------|-------|----------|----------|----------|----------|----------|----------|
| Q87K03  | Thiol:disulfide interchange protein OS=Vibrio parahaemolyticus serotype O3:K6 (strain RIMD 2210633) GN=VP3054 PE=3 SV=1                           | 23.5 | 22.8  | 1.30E+07 | 1.30E+07 | 1.80E+07 | 6.40E+06 | 1.40E+07 | 1.50E+07 |
| Q87K04  | Methionyl-tRNA formyltransferase OS=Vibrio parahaemolyticus serotype O3:K6 (strain RIMD 2210633) GN=fmt PE=3 SV=1                                 | 3.8  | 34.1  |          |          |          |          |          |          |
| Q87KE1  | N5-carboxyaminoimidazole ribonucleotide mutase OS=Vibrio parahaemolyticus serotype O3:K6 (strain RIMD 2210633) GN=purE PE=3 SV=1                  | 8.1  | 16.6  |          | 2.00E+07 | 2.20E+07 |          | 2.30E+07 | 2.20E+07 |
| Q87KE3  | Oxygen-dependent coproporphyrinogen-III oxidase OS=Vibrio parahaemolyticus serotype O3:K6 (strain RIMD 2210633) GN=hemF PE=3 SV=1                 | 3.6  | 35.4  |          | 3.60E+06 |          |          |          |          |
| Q87K07  | Phosphomethylglymidine synthase OS=Vibrio parahaemolyticus serotype O3:K6 (strain RIMD 2210633) GN=thiC PE=3 SV=1                                 | 4.5  | 72.4  | 1.70E+06 |          | 2.40E+06 |          | 4.10E+06 | 3.60E+06 |
| Q87K08  | Aminopeptidase P OS=Vibrio parahaemolyticus serotype O3:K6 (strain RIMD 2210633) GN=VP3021 PE=4 SV=1                                              | 13.9 | 65.5  | 1.20E+07 | 8.60E+06 | 9.60E+06 | 6.20E+06 | 9.70E+06 | 1.20E+07 |
| Q87K64  | DNA helicase OS=Vibrio parahaemolyticus serotype O3:K6 (strain RIMD 2210633) GN=VP3103 PE=4 SV=1                                                  | 0.8  | 82.4  | 2.00E+06 |          | 2.40E+06 |          |          |          |
| Q87K17  | Putative uroporphyrin-III C-methyltransferase OS=Vibrio parahaemolyticus serotype O3:K6 (strain RIMD 2210633) GN=VP2990 PE=4 SV=1                 | 5.5  | 45.1  | 4.60E+06 | 6.00E+06 | 4.60E+06 | 4.40E+06 |          | 1.60E+06 |
| Q87K19  | Porphobilinogen desaminase OS=Vibrio parahaemolyticus serotype O3:K6 (strain RIMD 2210633) GN=hemC PE=3 SV=1                                      | 3.5  | 34.1  |          |          |          |          |          | 4.00E+06 |
| Q87KJ3  | Diaminopimelate decarboxylase OS=Vibrio parahaemolyticus serotype O3:K6 (strain RIMD 2210633) GN=lysA PE=3 SV=1                                   | 21.1 | 45.9  | 1.10E+07 | 1.20E+07 | 9.50E+06 | 9.50E+06 | 9.60E+06 | 1.40E+07 |
| Q87KK7  | Glyceroldehyde-3-phosphate dehydrogenase OS=Vibrio parahaemolyticus serotype O3:K6 (strain RIMD 2210633) GN=VP2970 PE=3 SV=1                      | 2.4  | 36.4  |          |          |          |          |          |          |
| Q87KN9  | Vitamin B12 transporter BtuB OS=Vibrio parahaemolyticus serotype O3:K6 (strain RIMD 2210633) GN=btuB PE=3 SV=1                                    | 1.4  | 69.3  | 1.90E+06 |          |          |          |          |          |
| Q87K00  | 50S ribosomal protein L11 OS=Vibrio parahaemolyticus serotype O3:K6 (strain RIMD 2210633) GN=rplK PE=3 SV=1                                       | 36.8 | 14.7  | 1.80E+07 | 1.70E+07 | 2.00E+07 | 1.10E+07 |          | 8.30E+06 |
| Q87K01  | 50S ribosomal protein L1 OS=Vibrio parahaemolyticus serotype O3:K6 (strain RIMD 2210633) GN=rplA PE=3 SV=1                                        | 26.2 | 24.7  | 1.60E+07 | 1.80E+07 | 1.90E+07 | 1.10E+07 | 1.60E+07 | 1.50E+07 |
| Q87K02  | 50S ribosomal protein L10 OS=Vibrio parahaemolyticus serotype O3:K6 (strain RIMD 2210633) GN=rplJ PE=3 SV=1                                       | 13.6 | 17.3  |          | 5.60E+06 | 3.40E+06 |          |          |          |
| Q87K04  | DNA-directed RNA polymerase subunit beta OS=Vibrio parahaemolyticus serotype O3:K6 (strain RIMD 2210633) GN=rpoB PE=3 SV=1                        | 17.4 | 149.5 | 7.80E+06 | 9.40E+06 | 8.80E+06 | 3.90E+06 | 1.20E+07 | 1.20E+07 |
| Q87K05  | DNA-directed RNA polymerase subunit beta' OS=Vibrio parahaemolyticus serotype O3:K6 (strain RIMD 2210633) GN=rpoC PE=3 SV=1                       | 13.8 | 154.8 | 9.30E+06 | 8.80E+06 | 1.30E+07 | 5.50E+06 | 1.60E+07 | 1.20E+07 |
| Q87KR5  | DNA-binding protein HU-2 OS=Vibrio parahaemolyticus serotype O3:K6 (strain RIMD 2210633) GN=VP2911 PE=3 SV=1                                      | 63.7 | 9.6   | 2.80E+07 | 3.10E+07 | 3.10E+07 | 2.10E+07 | 4.40E+07 | 5.10E+07 |
| Q87KS8  | Phosphoribosylamine-glycine ligase OS=Vibrio parahaemolyticus serotype O3:K6 (strain RIMD 2210633) GN=purD PE=3 SV=1                              | 6.8  | 45.8  |          |          | 7.80E+06 |          |          | 8.40E+06 |
| Q87KT0  | Bifunctional purine biosynthesis protein PurH OS=Vibrio parahaemolyticus serotype O3:K6 (strain RIMD 2210633) GN=purH PE=3 SV=1                   | 25.3 | 57.3  | 7.40E+06 | 6.80E+06 | 9.90E+06 | 4.80E+06 | 1.50E+07 | 1.50E+07 |
| Q87KU7  | Acetyl-coenzyme A synthetase OS=Vibrio parahaemolyticus serotype O3:K6 (strain RIMD 2210633) GN=acsA PE=3 SV=1                                    | 7.2  | 71.7  | 1.60E+07 | 9.50E+06 | 1.10E+07 | 6.80E+06 | 1.20E+07 | 1.30E+07 |
| Q87KV2  | Fumarate hydratase class II OS=Vibrio parahaemolyticus serotype O3:K6 (strain RIMD 2210633) GN=fumC PE=3 SV=1                                     | 38.4 | 48.7  | 5.40E+07 | 5.00E+07 | 6.80E+07 | 2.80E+07 | 6.60E+07 | 6.80E+07 |
| Q87KW2  | Aspartate ammonia-lyase OS=Vibrio parahaemolyticus serotype O3:K6 (strain RIMD 2210633) GN=VP2863 PE=3 SV=1                                       | 27.3 | 52.7  | 2.00E+07 | 1.50E+07 | 2.00E+07 | 8.50E+06 | 2.60E+07 | 1.60E+07 |
| Q87KW5  | Superoxide dismutase OS=Vibrio parahaemolyticus serotype O3:K6 (strain RIMD 2210633) GN=VP2860 PE=3 SV=1                                          | 37.1 | 23.0  | 4.40E+07 | 3.30E+07 | 4.30E+07 | 2.60E+07 | 4.80E+07 | 5.20E+07 |
| Q87KX0  | ATP-dependent 6-phosphofructokinase OS=Vibrio parahaemolyticus serotype O3:K6 (strain RIMD 2210633) GN=pfkA PE=3 SV=1                             | 17.2 | 34.6  | 8.30E+06 | 8.10E+06 | 8.80E+06 | 1.20E+07 | 1.70E+07 | 8.30E+06 |
| Q87KX4  | Uncharacterized protein OS=Vibrio parahaemolyticus serotype O3:K6 (strain RIMD 2210633) GN=VP2850 PE=4 SV=1                                       | 11.0 | 20.2  | 8.40E+06 | 9.40E+06 | 8.00E+06 | 5.60E+06 | 8.90E+06 | 6.00E+06 |
| Q87KX9  | Elongation factor P OS=Vibrio parahaemolyticus serotype O3:K6 (strain RIMD 2210633) GN=efp PE=3 SV=1                                              | 6.4  | 20.6  | 3.60E+06 |          |          |          | 6.90E+06 | 1.40E+07 |
| Q87KZ3  | Protein-export protein SecB OS=Vibrio parahaemolyticus serotype O3:K6 (strain RIMD 2210633) GN=secB PE=3 SV=1                                     | 15.6 | 17.2  |          |          |          |          | 1.20E+07 | 9.00E+06 |
| Q87KZ5  | 2,3-bisphosphoglycerate-independent phosphoglycerate mutase OS=Vibrio parahaemolyticus serotype O3:K6 (strain RIMD 2210633) GN=pgmI PE=3 SV=1     | 16.1 | 55.1  | 8.10E+06 | 1.00E+07 | 9.30E+06 | 9.50E+06 | 1.70E+07 | 1.40E+07 |
| Q87L07  | RNA-binding protein Hfq OS=Vibrio parahaemolyticus serotype O3:K6 (strain RIMD 2210633) GN=hfq PE=3 SV=1                                          | 39.1 | 9.8   | 1.50E+07 | 2.20E+07 | 2.00E+07 | 1.20E+07 | 3.00E+07 | 2.70E+07 |
| Q87L13  | Tryptophan-tRNA ligase OS=Vibrio parahaemolyticus serotype O3:K6 (strain RIMD 2210633) GN=trpS PE=3 SV=1                                          | 6.5  | 37.6  | 4.30E+06 | 5.70E+06 | 5.90E+06 | 3.00E+06 | 7.30E+06 | 6.80E+06 |
| Q87L18  | Extracellular nuclease-related protein OS=Vibrio parahaemolyticus serotype O3:K6 (strain RIMD 2210633) GN=VP2799 PE=4 SV=1                        | 9.2  | 105.9 | 7.60E+06 | 1.40E+07 | 1.10E+07 | 1.10E+07 | 8.30E+06 | 9.90E+06 |
| Q87L20  | Acetylornithine aminotransferase OS=Vibrio parahaemolyticus serotype O3:K6 (strain RIMD 2210633) GN=argD PE=3 SV=1                                | 33.7 | 43.3  | 2.10E+07 | 2.40E+07 | 2.10E+07 | 1.80E+07 | 2.40E+07 | 2.50E+07 |
| Q87L23  | Uncharacterized protein OS=Vibrio parahaemolyticus serotype O3:K6 (strain RIMD 2210633) GN=VP2794 PE=4 SV=1                                       | 37.6 | 29.2  | 2.10E+07 | 2.80E+07 | 1.50E+07 | 1.70E+07 | 1.10E+07 | 2.00E+07 |
| Q87L24  | Phosphoribulokinase OS=Vibrio parahaemolyticus serotype O3:K6 (strain RIMD 2210633) GN=VP2792 PE=4 SV=1                                           | 4.5  | 32.7  |          |          | 5.00E+06 |          |          |          |
| Q87L38  | Peptidyl-prolyl cis-trans isomerase OS=Vibrio parahaemolyticus serotype O3:K6 (strain RIMD 2210633) GN=VP2778 PE=4 SV=1                           | 25.0 | 28.3  | 1.00E+07 | 7.90E+06 | 1.20E+07 | 5.40E+06 | 5.00E+06 | 3.40E+06 |
| Q87L43  | 30S ribosomal protein S12 OS=Vibrio parahaemolyticus serotype O3:K6 (strain RIMD 2210633) GN=rpsL PE=3 SV=1                                       | 8.9  | 13.7  | 5.10E+06 | 3.70E+06 |          |          |          |          |
| Q87L44  | 30S ribosomal protein S7 OS=Vibrio parahaemolyticus serotype O3:K6 (strain RIMD 2210633) GN=rpsG PE=3 SV=1                                        | 51.3 | 17.7  | 2.80E+07 | 2.40E+07 | 3.00E+07 | 1.80E+07 | 4.00E+07 | 4.00E+07 |
| Q87L45  | Elongation factor G 1 OS=Vibrio parahaemolyticus serotype O3:K6 (strain RIMD 2210633) GN=efuA1 PE=3 SV=1                                          | 8.9  | 77.5  | 3.40E+06 | 6.80E+06 | 1.10E+07 | 9.10E+06 | 1.20E+07 | 1.40E+07 |
| Q87L48  | Putative malate oxidoreductase OS=Vibrio parahaemolyticus serotype O3:K6 (strain RIMD 2210633) GN=VP2787 PE=3 SV=1                                | 15.1 | 46.1  | 1.60E+07 | 1.20E+07 | 1.10E+07 | 5.60E+06 | 9.00E+06 | 1.10E+07 |
| Q87L50  | Cystathionine gamma-synthase OS=Vibrio parahaemolyticus serotype O3:K6 (strain RIMD 2210633) GN=VP2785 PE=3 SV=1                                  | 14.2 | 41.8  | 1.90E+07 | 1.10E+07 | 1.70E+07 | 1.20E+07 | 2.40E+07 | 2.10E+07 |
| Q87L55  | N-acetyl-gamma-glutamyl-phosphate reductase OS=Vibrio parahaemolyticus serotype O3:K6 (strain RIMD 2210633) GN=argC PE=3 SV=1                     | 30.5 | 36.2  | 1.50E+07 | 1.40E+07 | 1.60E+07 | 7.80E+06 | 1.20E+07 | 1.60E+07 |
| Q87L72  | 30S ribosomal protein S6 OS=Vibrio parahaemolyticus serotype O3:K6 (strain RIMD 2210633) GN=rpsF PE=3 SV=1                                        | 17.1 | 15.0  | 6.90E+06 | 7.70E+06 | 1.00E+07 |          |          | 4.60E+06 |
| Q87L75  | 50S ribosomal protein L9 OS=Vibrio parahaemolyticus serotype O3:K6 (strain RIMD 2210633) GN=rplI PE=3 SV=1                                        | 15.3 | 15.7  | 8.50E+06 | 6.50E+06 | 1.10E+07 |          |          | 1.90E+06 |
| Q87L81  | Glucose-6-phosphate isomerase OS=Vibrio parahaemolyticus serotype O3:K6 (strain RIMD 2210633) GN=pgi PE=3 SV=1                                    | 40.7 | 60.9  | 7.00E+07 | 6.30E+07 | 6.70E+07 | 4.40E+07 | 8.30E+07 | 8.80E+07 |
| Q87L90  | Sulfite reductase [NADPH] flavoprotein alpha-component OS=Vibrio parahaemolyticus serotype O3:K6 (strain RIMD 2210633) GN=cysJ PE=3 SV=1          | 7.7  | 68.7  | 9.30E+06 | 5.40E+06 | 9.10E+06 | 3.80E+06 | 1.00E+07 | 9.90E+06 |
| Q87L91  | Sulfite reductase [NADPH] hemoprotein beta-component OS=Vibrio parahaemolyticus serotype O3:K6 (strain RIMD 2210633) GN=cysI PE=3 SV=1            | 6.2  | 64.8  |          |          | 7.10E+06 | 3.00E+06 | 9.10E+06 | 5.10E+06 |
| Q87L96  | Aminotransferase, class V OS=Vibrio parahaemolyticus serotype O3:K6 (strain RIMD 2210633) GN=VP2714 PE=3 SV=1                                     | 2.4  | 40.8  | 7.50E+06 |          |          |          |          |          |
| Q87LBA3 | Single-stranded DNA-binding protein OS=Vibrio parahaemolyticus serotype O3:K6 (strain RIMD 2210633) GN=ssb PE=3 SV=1                              | 8.0  | 19.6  | 9.10E+06 | 1.00E+07 | 8.00E+06 |          |          |          |
| Q87L04  | Putative V10 pilin OS=Vibrio parahaemolyticus serotype O3:K6 (strain RIMD 2210633) GN=VP2698 PE=4 SV=1                                            | 31.5 | 16.8  | 3.50E+07 | 2.60E+07 | 2.70E+07 | 2.00E+07 | 2.00E+07 | 2.10E+07 |
| Q87L00  | Uncharacterized protein OS=Vibrio parahaemolyticus serotype O3:K6 (strain RIMD 2210633) GN=VP2692 PE=4 SV=1                                       | 0.7  | 159.5 |          |          |          |          |          |          |
| Q87L06  | Uncharacterized protein OS=Vibrio parahaemolyticus serotype O3:K6 (strain RIMD 2210633) GN=VP2656 PE=4 SV=1                                       | 12.4 | 13.8  | 9.70E+06 | 9.10E+06 | 8.70E+06 | 5.70E+06 |          | 9.00E+06 |
| Q87L08  | Aspartate carbamoyltransferase OS=Vibrio parahaemolyticus serotype O3:K6 (strain RIMD 2210633) GN=pyrB PE=3 SV=1                                  | 10.0 | 34.5  | 4.80E+06 |          |          |          |          |          |
| Q87L09  | Ornithine carbamoyltransferase OS=Vibrio parahaemolyticus serotype O3:K6 (strain RIMD 2210633) GN=argF PE=3 SV=1                                  | 45.5 | 37.3  | 4.70E+07 | 4.00E+07 | 3.70E+07 | 3.50E+07 | 5.10E+07 | 4.90E+07 |
| Q87L04  | Probable cytosol aminopeptidase OS=Vibrio parahaemolyticus serotype O3:K6 (strain RIMD 2210633) GN=pepA PE=3 SV=1                                 | 10.4 | 54.4  |          |          |          |          |          | 4.80E+06 |
| Q87LH8  | Deacetylase DA1 OS=Vibrio parahaemolyticus serotype O3:K6 (strain RIMD 2210633) GN=VP2638 PE=4 SV=1                                               | 36.8 | 47.0  | 5.50E+07 | 5.10E+07 | 1.00E+08 | 4.70E+08 | 4.10E+08 | 5.10E+08 |
| Q87LH6  | Permease IIC component OS=Vibrio parahaemolyticus serotype O3:K6 (strain RIMD 2210633) GN=VP2636 PE=4 SV=1                                        | 9.2  | 48.7  |          |          |          |          | 1.70E+07 | 1.10E+07 |
| Q87LK6  | S-adenosylmethionine synthase OS=Vibrio parahaemolyticus serotype O3:K6 (strain RIMD 2210633) GN=metK PE=3 SV=1                                   | 2.9  | 42.0  |          |          |          | 2.80E+06 |          |          |
| Q87LK8  | Transketolase 1 OS=Vibrio parahaemolyticus serotype O3:K6 (strain RIMD 2210633) GN=tkt1 PE=3 SV=1                                                 | 7.2  | 72.0  | 1.70E+07 | 1.20E+07 | 1.20E+07 |          | 7.60E+06 | 8.40E+06 |
| Q87LL1  | Phosphoglycerate kinase OS=Vibrio parahaemolyticus serotype O3:K6 (strain RIMD 2210633) GN=pgk PE=3 SV=1                                          | 45.1 | 40.7  | 3.10E+07 | 3.10E+07 | 3.60E+07 | 2.40E+07 | 3.30E+07 | 3.50E+07 |
| Q87LL2  | Fructose-bisphosphate aldolase, class II OS=Vibrio parahaemolyticus serotype O3:K6 (strain RIMD 2210633) GN=VP2599 PE=4 SV=1                      | 68.4 | 38.9  | 1.60E+08 | 1.70E+08 | 1.80E+08 | 1.40E+08 | 2.00E+08 | 2.30E+08 |
| Q87LL3  | Uncharacterized protein OS=Vibrio parahaemolyticus serotype O3:K6 (strain RIMD 2210633) GN=VP2598 PE=4 SV=1                                       | 2.8  | 31.0  | 2.20E+06 | 2.20E+06 |          |          |          |          |
| Q87LL8  | D-3-phosphoglycerate dehydrogenase OS=Vibrio parahaemolyticus serotype O3:K6 (strain RIMD 2210633) GN=VP2593 PE=3 SV=1                            | 28.0 | 44.7  | 1.40E+07 | 1.50E+07 | 1.80E+07 | 1.40E+07 | 2.70E+07 | 2.70E+07 |
| Q87LL9  | Ribose-5-phosphate isomerase A OS=Vibrio parahaemolyticus serotype O3:K6 (strain RIMD 2210633) GN=rpiA PE=3 SV=1                                  | 28.0 | 23.2  | 1.10E+07 | 1.10E+07 | 1.20E+07 | 5.80E+06 | 8.70E+06 | 7.30E+06 |
| Q87LM8  | tRNA-modifying protein YgZ OS=Vibrio parahaemolyticus serotype O3:K6 (strain RIMD 2210633) GN=VP2583 PE=3 SV=1                                    | 3.7  | 35.5  |          |          |          |          |          |          |
| Q87LP2  | Pyridoxine 5-phosphate synthase OS=Vibrio parahaemolyticus serotype O3:K6 (strain RIMD 2210633) GN=pxdJ PE=3 SV=1                                 | 14.4 | 26.7  | 7.70E+06 | 7.30E+06 | 8.10E+06 | 1.00E+07 | 9.90E+06 | 1.10E+07 |
| Q87L00  | Enolase OS=Vibrio parahaemolyticus serotype O3:K6 (strain RIMD 2210633) GN=eno PE=3 SV=1                                                          | 56.8 | 45.5  | 7.30E+07 | 6.70E+07 | 7.60E+07 | 5.70E+07 | 7.00E+07 | 9.30E+07 |
| Q87LR1  | Protein RecA OS=Vibrio parahaemolyticus serotype O3:K6 (strain RIMD 2210633) GN=recA PE=3 SV=1                                                    | 3.2  | 37.4  |          | 1.70E+06 | 2.30E+06 | 9.60E+05 |          |          |
| Q87LR5  | Alanine-tRNA ligase OS=Vibrio parahaemolyticus serotype O3:K6 (strain RIMD 2210633) GN=alaS PE=3 SV=1                                             | 2.1  | 93.9  |          |          |          |          | 3.60E+06 | 7.00E+06 |
| Q87LR5  | Carbon storage regulator homolog OS=Vibrio parahaemolyticus serotype O3:K6 (strain RIMD 2210633) GN=csrA PE=3 SV=1                                | 18.5 | 7.1   | 1.70E+07 | 2.40E+07 | 1.70E+07 | 4.80E+06 | 1.30E+07 | 2.50E+07 |
| Q87LR7  | Oxalacetate decarboxylase, alpha subunit OS=Vibrio parahaemolyticus serotype O3:K6 (strain RIMD 2210633) GN=VP2544 PE=4 SV=1                      | 6.7  | 64.2  | 8.90E+06 | 7.00E+06 | 6.60E+06 | 4.20E+06 | 5.40E+06 | 4.10E+06 |
| Q87LS1  | Protease, insulinase family OS=Vibrio parahaemolyticus serotype O3:K6 (strain RIMD 2210633) GN=VP2540 PE=3 SV=1                                   | 7.3  | 105.7 | 5.70E+06 | 8.10E+06 | 5.80E+06 | 6.10E+06 | 1.50E+07 | 1.20E+07 |
| Q87LS2  | Glutamate-cysteine ligase OS=Vibrio parahaemolyticus serotype O3:K6 (strain RIMD 2210633) GN=gshA PE=3 SV=1                                       | 8.4  | 59.0  |          | 2.70E+06 | 2.20E+06 |          |          | 7.80E+06 |
| Q87LS3  | Uncharacterized protein OS=Vibrio parahaemolyticus serotype O3:K6 (strain RIMD 2210633) GN=VP2338 PE=3 SV=1                                       | 4.9  | 23.3  |          |          |          |          | 6.20E+06 | 2.30E+06 |
| Q87LS8  | 30S ribosomal protein S16 OS=Vibrio parahaemolyticus serotype O3:K6 (strain RIMD 2210633) GN=rpsP PE=3 SV=1                                       | 8.5  | 9.1   |          |          |          |          |          |          |
| Q87LT1  | 50S ribosomal protein L19 OS=Vibrio parahaemolyticus serotype O3:K6 (strain RIMD 2210633) GN=rplS PE=3 SV=2                                       | 10.3 | 13.2  | 6.60E+06 | 6.10E+06 | 7.90E+06 | 3.30E+06 | 4.00E+06 | 5.30E+06 |
| Q87LT9  | NadC OS=Vibrio parahaemolyticus serotype O3:K6 (strain RIMD 2210633) GN=VP2522 PE=3 SV=1                                                          | 6.4  | 32.0  |          | 4.10E+06 | 5.20E+06 |          | 6.20E+06 | 8.20E+06 |
| Q87L02  | Pyruvate dehydrogenase E1 component OS=Vibrio parahaemolyticus serotype O3:K6 (strain RIMD 2210633) GN=VP2519 PE=4 SV=1                           | 33.9 | 99.6  | 4.30E+07 | 4.00E+07 | 4.80E+07 | 3.10E+07 | 4.40E+07 | 4.10E+07 |
| Q87LU3  | Acetyltransferase component of pyruvate dehydrogenase complex OS=Vibrio parahaemolyticus serotype O3:K6 (strain RIMD 2210633) GN=VP2518 PE=3 SV=1 | 26.3 | 64.9  | 1.50E+07 | 1.50E+07 | 1.80E+07 | 7.60E+06 | 1.30E+07 | 1.60E+07 |
| Q87LU4  | Carbonic anhydrase OS=Vibrio parahaemolyticus serotype O3:K6 (strain RIMD 2210633) GN=VP2514 PE=3 SV=1                                            | 10.8 | 25.2  | 9.00E+06 |          |          |          | 7.50E+06 | 1.80E+07 |
| Q87LV1  | Pantothenate synthetase OS=Vibrio parahaemolyticus serotype O3:K6 (strain RIMD 2210633) GN=panC PE=3 SV=1                                         | 3.0  | 33.4  |          | 3.90E+0  |          |          |          |          |

|        |                                                                                                                                                                                     |      |       |          |          |          |          |          |
|--------|-------------------------------------------------------------------------------------------------------------------------------------------------------------------------------------|------|-------|----------|----------|----------|----------|----------|
| Q87M12 | 4-hydroxy-tetrahydrodipicolinate synthase OS=Vibrio parahaemolyticus serotype O3K6 (strain RIMD 2210633) GN=dapA PE=3 SV=1                                                          | 24.3 | 31.2  | 5.70E+06 | 7.80E+06 | 7.90E+06 | 4.90E+06 | 9.50E+06 |
| Q87M13 | Outer membrane protein assembly factor BamC OS=Vibrio parahaemolyticus serotype O3K6 (strain RIMD 2210633) GN=bamC PE=3 SV=1                                                        | 11.2 | 38.1  | 5.90E+06 | 4.50E+06 | 5.20E+06 | 5.00E+06 |          |
| Q87ML9 | Long-chain fatty acid transport protein OS=Vibrio parahaemolyticus serotype O3K6 (strain RIMD 2210633) GN=VP212 PE=4 SV=1                                                           | 24.0 | 45.7  | 2.40E+07 | 2.00E+07 | 2.10E+07 | 1.40E+07 | 1.70E+07 |
| Q87MN7 | 3-oxoacyl-[acyl-carrier-protein] synthase I OS=Vibrio parahaemolyticus serotype O3K6 (strain RIMD 2210633) GN=VP2194 PE=3 SV=1                                                      | 2.2  | 42.6  | 2.80E+08 | 2.00E+08 | 1.80E+06 | 2.60E+08 |          |
| Q87M26 | Acetyl-coenzyme A carboxylase carboxyl transferase subunit beta 1 OS=Vibrio parahaemolyticus serotype O3K6 (strain RIMD 2210633) GN=accD1 PE=3 SV=1                                 | 9.7  | 34.0  | 6.40E+06 | 8.60E+06 | 6.30E+06 | 4.90E+06 | 5.90E+06 |
| Q87MS0 | Uncharacterized protein OS=Vibrio parahaemolyticus serotype O3K6 (strain RIMD 2210633) GN=VP2161 PE=4 SV=1                                                                          | 30.8 | 35.2  | 1.70E+07 | 2.00E+07 | 1.40E+07 | 1.30E+07 | 1.50E+07 |
| Q87MS4 | Glyceraldehyde-3-phosphate dehydrogenase OS=Vibrio parahaemolyticus serotype O3K6 (strain RIMD 2210633) GN=VP2157 PE=3 SV=1                                                         | 73.4 | 35.2  | 3.50E+08 | 3.80E+08 | 4.20E+08 | 3.10E+08 | 5.00E+08 |
| Q87MT7 | Aspartate-semialdehyde dehydrogenase OS=Vibrio parahaemolyticus serotype O3K6 (strain RIMD 2210633) GN=VP2121 PE=3 SV=1                                                             | 64.7 | 40.2  | 6.60E+07 | 7.20E+07 | 7.90E+07 | 6.00E+07 | 1.10E+08 |
| Q87MW0 | Aldehyde-alcohol dehydrogenase OS=Vibrio parahaemolyticus serotype O3K6 (strain RIMD 2210633) GN=VP2121 PE=1 SV=1                                                                   | 3.3  | 97.1  | 5.90E+06 | 5.90E+06 | 5.50E+06 | 3.90E+06 | 4.00E+06 |
| Q87MW3 | Superoxide dismutase OS=Vibrio parahaemolyticus serotype O3K6 (strain RIMD 2210633) GN=VP2118 PE=3 SV=1                                                                             | 10.1 | 22.2  | 1.30E+07 | 1.20E+07 | 1.20E+07 | 1.90E+07 | 1.20E+07 |
| Q87MY5 | Oligopeptide ABC transporter, periplasmic oligopeptide-binding protein OS=Vibrio parahaemolyticus serotype O3K6 (strain RIMD 2210633) GN=VP2091 PE=4 SV=1                           | 24.1 | 62.3  | 1.50E+07 | 1.70E+07 | 1.30E+07 | 7.80E+06 | 8.50E+06 |
| Q87M23 | Phosphate acetyltransferase OS=Vibrio parahaemolyticus serotype O3K6 (strain RIMD 2210633) GN=VP2083 PE=3 SV=1                                                                      | 2.2  | 76.6  |          |          | 4.20E+06 |          | 3.10E+06 |
| Q87M26 | ABC transporter substrate-binding protein OS=Vibrio parahaemolyticus serotype O3K6 (strain RIMD 2210633) GN=VP2080 PE=4 SV=1                                                        | 41.1 | 33.2  | 1.60E+07 | 1.70E+07 | 2.50E+07 | 1.60E+07 | 2.30E+07 |
| Q87N07 | Methionine-tRNA ligase OS=Vibrio parahaemolyticus serotype O3K6 (strain RIMD 2210633) GN=metG PE=3 SV=2                                                                             | 3.9  | 77.9  | 3.80E+06 | 4.30E+06 | 5.40E+06 | 2.70E+06 | 4.80E+06 |
| Q87N21 | Malonyl CoA-acyl carrier protein transacylase OS=Vibrio parahaemolyticus serotype O3K6 (strain RIMD 2210633) GN=VP2055 PE=3 SV=1                                                    | 12.4 | 32.3  | 6.50E+06 | 1.20E+07 | 2.10E+07 | 2.10E+07 | 2.40E+07 |
| Q87N29 | PTS system, glucose-specific IIBC component OS=Vibrio parahaemolyticus serotype O3K6 (strain RIMD 2210633) GN=VP2046 PE=4 SV=1                                                      | 14.9 | 49.4  | 2.30E+07 | 2.10E+07 | 1.60E+07 | 1.20E+07 | 9.70E+06 |
| Q87N36 | Pyruvate kinase OS=Vibrio parahaemolyticus serotype O3K6 (strain RIMD 2210633) GN=VP2039 PE=3 SV=1                                                                                  | 2.5  | 51.7  |          |          | 2.90E+06 |          |          |
| Q87N45 | 30S ribosomal protein S1 OS=Vibrio parahaemolyticus serotype O3K6 (strain RIMD 2210633) GN=VP2030 PE=3 SV=1                                                                         | 14.2 | 60.9  | 1.50E+07 | 1.30E+07 | 1.60E+07 | 9.80E+06 | 8.60E+06 |
| Q87N50 | Uncharacterized protein OS=Vibrio parahaemolyticus serotype O3K6 (strain RIMD 2210633) GN=VP2025 PE=4 SV=1                                                                          | 7.8  | 76.6  | 9.10E+06 | 1.30E+07 |          | 3.30E+06 | 1.20E+07 |
| Q87N84 | 5-methyltetrahydropteroylglutamate-homocysteine methyltransferase OS=Vibrio parahaemolyticus serotype O3K6 (strain RIMD 2210633) GN=VP1991 PE=4 SV=1                                | 5.8  | 38.5  | 4.30E+06 |          |          |          | 4.70E+06 |
| Q87N14 | 5-methyltetrahydropteroylglutamate-homocysteine methyltransferase OS=Vibrio parahaemolyticus serotype O3K6 (strain RIMD 2210633) GN=metE PE=3 SV=1                                  | 29.6 | 84.7  | 3.10E+07 | 2.40E+07 | 2.80E+07 | 1.70E+07 | 2.50E+07 |
| Q87NC7 | Putative carboxynorspermidine dehydrogenase OS=Vibrio parahaemolyticus serotype O3K6 (strain RIMD 2210633) GN=VP1941 PE=4 SV=1                                                      | 3.8  | 46.5  |          |          | 7.20E+06 |          |          |
| Q87NC8 | Carboxynorspermidine/carboxyspermidine decarboxylase OS=Vibrio parahaemolyticus serotype O3K6 (strain RIMD 2210633) GN=VP1940 PE=3 SV=1                                             | 6.6  | 42.0  | 4.80E+06 | 3.80E+06 | 6.00E+06 | 3.40E+06 | 5.60E+06 |
| Q87ND3 | Ribonucleoside-diphosphate reductase, beta subunit OS=Vibrio parahaemolyticus serotype O3K6 (strain RIMD 2210633) GN=VP1935 PE=4 SV=1                                               | 6.6  | 43.7  |          |          | 9.20E+06 |          | 1.00E+07 |
| Q87NF0 | Uncharacterized protein OS=Vibrio parahaemolyticus serotype O3K6 (strain RIMD 2210633) GN=VP1918 PE=4 SV=1                                                                          | 3.8  | 38.5  |          | 7.40E+06 | 3.60E+06 | 2.90E+06 | 5.10E+06 |
| Q87NF7 | Extracellular solute-binding protein, family 7 OS=Vibrio parahaemolyticus serotype O3K6 (strain RIMD 2210633) GN=VP1911 PE=3 SV=1                                                   | 26.0 | 41.0  | 1.70E+07 | 2.10E+07 | 7.80E+06 | 1.70E+07 | 1.50E+07 |
| Q87NG8 | Aspartate aminotransferase OS=Vibrio parahaemolyticus serotype O3K6 (strain RIMD 2210633) GN=VP1900 PE=3 SV=1                                                                       | 63.0 | 45.4  | 2.70E+08 | 2.90E+08 | 2.40E+08 | 2.10E+08 | 3.60E+08 |
| Q87NH5 | Asparagine-tRNA ligase OS=Vibrio parahaemolyticus serotype O3K6 (strain RIMD 2210633) GN=asnS PE=3 SV=1                                                                             | 22.5 | 52.6  | 1.20E+07 | 8.10E+06 | 9.50E+07 | 9.60E+06 | 1.10E+08 |
| Q87NM9 | Uncharacterized protein OS=Vibrio parahaemolyticus serotype O3K6 (strain RIMD 2210633) GN=VP1839 PE=4 SV=1                                                                          | 3.4  | 20.0  |          |          |          |          |          |
| Q87NU7 | 4-aminobutyrate aminotransferase OS=Vibrio parahaemolyticus serotype O3K6 (strain RIMD 2210633) GN=VP1771 PE=3 SV=1                                                                 | 2.8  | 45.1  |          | 3.10E+06 |          |          |          |
| Q87P08 | Glucose-6-phosphate 1-dehydrogenase OS=Vibrio parahaemolyticus serotype O3K6 (strain RIMD 2210633) GN=zwf PE=3 SV=1                                                                 | 6.6  | 57.6  | 6.60E+06 | 6.40E+06 | 4.40E+06 | 3.50E+06 | 6.50E+06 |
| Q87P09 | DevB protein OS=Vibrio parahaemolyticus serotype O3K6 (strain RIMD 2210633) GN=VP1709 PE=4 SV=1                                                                                     | 13.0 | 26.0  | 1.60E+07 | 1.40E+07 | 1.60E+07 | 8.60E+06 | 1.60E+07 |
| Q87P10 | 6-phosphogluconate dehydrogenase, decarboxylating OS=Vibrio parahaemolyticus serotype O3K6 (strain RIMD 2210633) GN=VP1708 PE=3 SV=1                                                | 29.7 | 52.5  | 3.80E+07 | 4.50E+07 | 4.60E+07 | 3.50E+07 | 5.10E+07 |
| Q87P62 | Putative translocator protein PopD OS=Vibrio parahaemolyticus serotype O3K6 (strain RIMD 2210633) GN=VP1656 PE=4 SV=1                                                               | 9.3  | 35.3  | 2.40E+06 |          |          |          | 1.20E+07 |
| Q87P63 | Immunogenic protein OS=Vibrio parahaemolyticus serotype O3K6 (strain RIMD 2210633) GN=VP1655 PE=4 SV=1                                                                              | 2.8  | 34.9  | 9.20E+07 | 9.80E+07 | 1.00E+08 | 7.30E+07 | 1.40E+08 |
| Q87P76 | Putative trypsin OS=Vibrio parahaemolyticus serotype O3K6 (strain RIMD 2210633) GN=VP1642 PE=4 SV=1                                                                                 | 1.7  | 54.0  |          |          |          |          | 6.40E+06 |
| Q87P91 | Amino acid ABC transporter, periplasmic amino acid-binding protein OS=Vibrio parahaemolyticus serotype O3K6 (strain RIMD 2210633) GN=VP1620 PE=4 SV=1                               | 6.4  | 36.7  | 5.10E+06 |          | 4.60E+06 |          |          |
| Q87PB1 | Tail-specific protease OS=Vibrio parahaemolyticus serotype O3K6 (strain RIMD 2210633) GN=VP1606 PE=4 SV=1                                                                           | 2.7  | 75.6  | 2.20E+06 | 2.70E+06 |          |          |          |
| Q87PB3 | Aminopeptidase N OS=Vibrio parahaemolyticus serotype O3K6 (strain RIMD 2210633) GN=VP1604 PE=4 SV=1                                                                                 | 5.1  | 98.4  | 4.90E+06 | 3.80E+06 | 4.60E+06 | 2.60E+06 | 7.30E+06 |
| Q87PB5 | Putative NAD-glutamate dehydrogenase OS=Vibrio parahaemolyticus serotype O3K6 (strain RIMD 2210633) GN=VP1602 PE=4 SV=1                                                             | 1.2  | 183.4 |          |          |          |          |          |
| Q87PB7 | Dihydroorotate dehydrogenase (quinone) OS=Vibrio parahaemolyticus serotype O3K6 (strain RIMD 2210633) GN=pyrD PE=3 SV=1                                                             | 3.3  | 36.9  |          | 6.50E+06 |          |          |          |
| Q87PC3 | Uncharacterized protein OS=Vibrio parahaemolyticus serotype O3K6 (strain RIMD 2210633) GN=VP1594 PE=4 SV=1                                                                          | 48.2 | 64.6  | 2.60E+07 | 3.80E+07 | 3.00E+07 | 2.60E+07 | 3.30E+07 |
| Q87PC5 | 3-hydroxydecanoyl-[acyl-carrier-protein] dehydratase OS=Vibrio parahaemolyticus serotype O3K6 (strain RIMD 2210633) GN=fabA PE=3 SV=1                                               | 22.7 | 19.0  | 4.90E+07 | 5.60E+07 | 5.60E+07 | 4.30E+07 | 6.40E+07 |
| Q87PF9 | Cytochrome c oxidase, subunit CcoO OS=Vibrio parahaemolyticus serotype O3K6 (strain RIMD 2210633) GN=VP1543 PE=4 SV=1                                                               | 4.9  | 23.6  | 2.70E+06 | 3.30E+06 |          |          |          |
| Q87PG1 | Cbb <sub>3</sub> -type cytochrome c oxidase subunit OS=Vibrio parahaemolyticus serotype O3K6 (strain RIMD 2210633) GN=VP1541 PE=3 SV=1                                              | 3.1  | 35.4  |          | 2.20E+06 |          |          |          |
| Q87PH6 | Putrescine-binding periplasmic protein OS=Vibrio parahaemolyticus serotype O3K6 (strain RIMD 2210633) GN=VP1526 PE=3 SV=1                                                           | 29.0 | 39.7  | 4.70E+07 | 4.10E+07 | 5.00E+07 | 2.90E+07 | 4.80E+07 |
| Q87PH7 | Putrescine-binding periplasmic protein OS=Vibrio parahaemolyticus serotype O3K6 (strain RIMD 2210633) GN=VP1525 PE=3 SV=1                                                           | 15.4 | 39.0  | 1.10E+07 | 1.20E+07 | 1.40E+07 | 9.70E+06 | 5.10E+06 |
| Q87PK2 | Uncharacterized protein OS=Vibrio parahaemolyticus serotype O3K6 (strain RIMD 2210633) GN=VP1501 PE=1 SV=1                                                                          | 32.0 | 30.1  | 1.30E+07 | 1.20E+07 | 9.90E+06 | 1.00E+07 | 1.50E+07 |
| Q87PP6 | Uncharacterized protein OS=Vibrio parahaemolyticus serotype O3K6 (strain RIMD 2210633) GN=VP1455 PE=4 SV=1                                                                          | 16.4 | 18.0  | 2.90E+07 | 3.90E+07 | 1.90E+07 | 1.70E+07 | 2.20E+07 |
| Q87Q03 | Oligopeptide ABC transporter, periplasmic oligopeptide-binding protein OS=Vibrio parahaemolyticus serotype O3K6 (strain RIMD 2210633) GN=VP1347 PE=4 SV=1                           | 1.7  | 60.3  | 1.00E+07 | 1.20E+07 |          | 9.00E+06 | 6.60E+06 |
| Q87Q24 | Uncharacterized protein OS=Vibrio parahaemolyticus serotype O3K6 (strain RIMD 2210633) GN=VP1328 PE=4 SV=1                                                                          | 18.8 | 57.7  | 2.00E+07 | 2.30E+07 | 1.80E+07 | 9.60E+06 | 1.90E+07 |
| Q87Q40 | Succinylglutamate desuccinylase OS=Vibrio parahaemolyticus serotype O3K6 (strain RIMD 2210633) GN=astE PE=1 SV=1                                                                    | 9.6  | 38.8  |          | 2.70E+06 |          | 4.10E+06 | 7.30E+06 |
| Q87Q42 | Putative oligopeptidase OS=Vibrio parahaemolyticus serotype O3K6 (strain RIMD 2210633) GN=VP1308 PE=4 SV=1                                                                          | 5.3  | 68.0  | 7.30E+05 | 1.90E+06 |          |          | 2.70E+06 |
| Q87Q56 | Integration host factor subunit alpha OS=Vibrio parahaemolyticus serotype O3K6 (strain RIMD 2210633) GN=ihfA PE=3 SV=1                                                              | 9.2  | 11.2  |          |          | 2.60E+07 |          |          |
| Q87Q59 | Phenylalanine-tRNA ligase beta subunit OS=Vibrio parahaemolyticus serotype O3K6 (strain RIMD 2210633) GN=phfT PE=3 SV=1                                                             | 1.2  | 87.0  |          |          | 5.20E+06 |          | 5.90E+06 |
| Q87Q80 | Uncharacterized protein OS=Vibrio parahaemolyticus serotype O3K6 (strain RIMD 2210633) GN=VP1270 PE=4 SV=1                                                                          | 2.1  | 112.8 |          |          | 2.10E+07 |          | 1.80E+07 |
| Q87Q83 | Putative lipoprotein OS=Vibrio parahaemolyticus serotype O3K6 (strain RIMD 2210633) GN=VP1267 PE=3 SV=1                                                                             | 5.4  | 23.7  |          |          | 1.80E+06 |          |          |
| Q87Q87 | Phosphoribosylaminoimidazole-succinocarboxamide synthase OS=Vibrio parahaemolyticus serotype O3K6 (strain RIMD 2210633) GN=purC PE=3 SV=1                                           | 36.8 | 41.0  | 1.30E+07 | 1.60E+07 | 2.50E+07 | 1.20E+07 | 2.30E+07 |
| Q87Q99 | Thioredoxin reductase OS=Vibrio parahaemolyticus serotype O3K6 (strain RIMD 2210633) GN=VP1251 PE=3 SV=1                                                                            | 27.3 | 34.5  | 1.70E+07 | 1.80E+07 | 1.40E+07 | 1.20E+07 | 1.90E+07 |
| Q87QA3 | Phosphoserine aminotransferase OS=Vibrio parahaemolyticus serotype O3K6 (strain RIMD 2210633) GN=serC PE=3 SV=1                                                                     | 25.5 | 40.2  | 3.60E+07 | 3.30E+07 | 3.40E+07 | 2.10E+07 | 3.50E+07 |
| Q87QA7 | Uncharacterized protein OS=Vibrio parahaemolyticus serotype O3K6 (strain RIMD 2210633) GN=VP1243 PE=4 SV=1                                                                          | 29.3 | 19.8  | 1.60E+07 | 1.80E+07 | 6.10E+06 | 1.50E+07 | 1.70E+07 |
| Q87QB7 | Glutaredoxin 1 OS=Vibrio parahaemolyticus serotype O3K6 (strain RIMD 2210633) GN=VP1233 PE=4 SV=1                                                                                   | 12.5 | 10.0  |          |          | 4.90E+06 |          |          |
| Q87QB9 | Putative reductase VPI231 OS=Vibrio parahaemolyticus serotype O3K6 (strain RIMD 2210633) GN=VP1231 PE=3 SV=1                                                                        | 46.5 | 43.9  | 4.40E+07 | 4.10E+07 | 4.30E+07 | 3.30E+07 | 5.30E+07 |
| Q87QE2 | UDP-sugar hydrolyase OS=Vibrio parahaemolyticus serotype O3K6 (strain RIMD 2210633) GN=VP1207 PE=3 SV=1                                                                             | 9.0  | 61.3  | 1.70E+07 | 1.80E+07 | 1.80E+07 | 1.30E+07 | 1.00E+07 |
| Q87QE6 | Heat shock protein HspJ OS=Vibrio parahaemolyticus serotype O3K6 (strain RIMD 2210633) GN=VP1203 PE=4 SV=1                                                                          | 26.4 | 16.6  | 4.20E+07 | 2.50E+07 | 3.80E+07 | 2.40E+07 | 3.40E+07 |
| Q87QF3 | Putative ABC transporter, periplasmic substrate-binding protein OS=Vibrio parahaemolyticus serotype O3K6 (strain RIMD 2210633) GN=VP1196 PE=4 SV=1                                  | 2.6  | 42.6  | 6.20E+06 | 5.50E+06 | 6.80E+06 |          | 7.90E+06 |
| Q87QG3 | Cystathionine beta-lyase OS=Vibrio parahaemolyticus serotype O3K6 (strain RIMD 2210633) GN=VP1182 PE=3 SV=1                                                                         | 3.2  | 44.6  |          |          | 5.00E+06 | 8.30E+06 | 1.20E+07 |
| Q87QJ9 | Cysteine-tRNA ligase OS=Vibrio parahaemolyticus serotype O3K6 (strain RIMD 2210633) GN=cysE PE=3 SV=1                                                                               | 3.7  | 52.0  |          |          |          |          |          |
| Q87OK7 | 1-(5-phosphoribosyl)-5-[(5-phosphoribosylamino)methylideneamino] imidazole-4-carboxamide isomerase OS=Vibrio parahaemolyticus serotype O3K6 (strain RIMD 2210633) GN=hisA PE=3 SV=1 | 20.8 | 26.4  | 1.00E+07 | 7.50E+06 | 9.30E+06 | 4.30E+06 | 7.50E+06 |
| Q87QK9 | Histidine biosynthesis bifunctional protein HisB OS=Vibrio parahaemolyticus serotype O3K6 (strain RIMD 2210633) GN=hisB PE=3 SV=1                                                   | 6.2  | 39.8  | 4.30E+06 | 5.30E+06 | 4.90E+06 | 3.40E+06 | 3.90E+06 |
| Q87QL0 | Histidinol-phosphate aminotransferase OS=Vibrio parahaemolyticus serotype O3K6 (strain RIMD 2210633) GN=hisC PE=3 SV=1                                                              | 10.1 | 38.2  | 3.30E+06 |          | 4.40E+06 |          | 6.50E+06 |
| Q87QL1 | Histidinol dehydrogenase OS=Vibrio parahaemolyticus serotype O3K6 (strain RIMD 2210633) GN=hisD PE=3 SV=1                                                                           | 13.5 | 46.1  | 7.80E+06 |          | 6.50E+06 | 1.70E+07 | 1.80E+07 |
| Q87QL2 | ATP phosphoribosyltransferase OS=Vibrio parahaemolyticus serotype O3K6 (strain RIMD 2210633) GN=hisG PE=3 SV=1                                                                      | 29.2 | 32.8  | 1.30E+07 | 1.30E+07 | 1.80E+07 | 1.20E+07 | 2.10E+07 |
| Q87QM1 | Adenylosuccinate lyase OS=Vibrio parahaemolyticus serotype O3K6 (strain RIMD 2210633) GN=VP1128 PE=3 SV=1                                                                           | 30.9 | 51.4  | 1.70E+07 | 2.20E+07 | 2.60E+07 | 1.50E+07 | 2.40E+07 |
| Q87QP1 | Serine-tRNA ligase OS=Vibrio parahaemolyticus serotype O3K6 (strain RIMD 2210633) GN=serS PE=3 SV=1                                                                                 | 13.8 | 48.8  | 6.20E+06 | 1.80E+07 | 1.20E+07 |          | 2.00E+07 |
| Q87QP8 | Alanine dehydrogenase OS=Vibrio parahaemolyticus serotype O3K6 (strain RIMD 2210633) GN=VP1103 PE=3 SV=1                                                                            | 47.8 | 39.9  | 4.60E+07 | 6.10E+07 | 3.20E+07 | 3.80E+07 | 5.20E+07 |
| Q87Q57 | Putative helicase OS=Vibrio parahaemolyticus serotype O3K6 (strain RIMD 2210633) GN=VP1072 PE=4 SV=1                                                                                | 6.1  | 68.7  |          |          |          |          | 6.10E+06 |
| Q87QT7 | Uncharacterized protein OS=Vibrio parahaemolyticus serotype O3K6 (strain RIMD 2210633) GN=VP1062 PE=4 SV=1                                                                          | 5.6  | 28.3  |          |          | 9.00E+06 | 5.10E+06 |          |
| Q87QT8 | Peptidoglycan-associated lipoprotein OS=Vibrio parahaemolyticus serotype O3K6 (strain RIMD 2210633) GN=VP1061 PE=3 SV=1                                                             | 12.6 | 18.7  | 3.30E+07 | 4.20E+07 | 3.50E+07 | 2.90E+07 | 2.70E+07 |
| Q      |                                                                                                                                                                                     |      |       |          |          |          |          |          |



Table S1

|        |                                                                                                                                                                                   |      |       |          |          |          |          |          |          |
|--------|-----------------------------------------------------------------------------------------------------------------------------------------------------------------------------------|------|-------|----------|----------|----------|----------|----------|----------|
| Q87R80 | ATP-dependent Clp protease proteolytic subunit OS=Vibrio parahaemolyticus serotype O3:K6 (strain RIMD 2210633) GN=clpP PE=3 SV=1                                                  | 16.0 | 22.0  | 2.40E+07 | 2.70E+07 | 2.70E+07 | 1.80E+07 | 3.10E+07 | 4.40E+07 |
| Q87R87 | C4-dicarboxylate-binding periplasmic protein OS=Vibrio parahaemolyticus serotype O3:K6 (strain RIMD 2210633) GN=VP0910 PE=4 SV=1                                                  | 47.9 | 37.1  | 4.80E+07 | 4.40E+07 | 4.80E+07 | 5.20E+07 | 6.60E+07 | 6.90E+07 |
| Q87RC1 | Putative lytic murein transglycosylase OS=Vibrio parahaemolyticus serotype O3:K6 (strain RIMD 2210633) GN=VP0876 PE=4 SV=1                                                        | 3.1  | 36.7  |          |          |          |          |          | 3.90E+06 |
| Q87RD3 | Formyltetrahydrofolate deformylase OS=Vibrio parahaemolyticus serotype O3:K6 (strain RIMD 2210633) GN=VpU PE=3 SV=1                                                               | 27.8 | 31.6  | 4.90E+06 | 8.70E+06 | 3.90E+07 | 7.60E+06 | 1.70E+07 | 7.30E+06 |
| Q87RD6 | Arginine-tRNA ligase OS=Vibrio parahaemolyticus serotype O3:K6 (strain RIMD 2210633) GN=argS PE=3 SV=1                                                                            | 20.1 | 63.8  | 9.30E+06 | 7.90E+06 | 1.10E+07 | 7.20E+06 | 1.40E+07 | 1.40E+07 |
| Q87RE4 | Zinc ABC transporter, periplasmic zinc-binding protein OS=Vibrio parahaemolyticus serotype O3:K6 (strain RIMD 2210633) GN=VP0853 PE=3 SV=1                                        | 18.2 | 32.1  | 9.80E+06 | 6.70E+06 | 5.70E+06 |          | 6.90E+06 | 6.20E+06 |
| Q87RE7 | Succinyl-CoA ligase [ADP-forming] subunit alpha OS=Vibrio parahaemolyticus serotype O3:K6 (strain RIMD 2210633) GN=VP0850 PE=3 SV=1                                               | 52.1 | 30.0  | 6.10E+07 | 5.60E+07 | 5.40E+07 | 3.20E+07 | 5.00E+07 | 5.20E+07 |
| Q87RE8 | Succinyl-CoA ligase [ADP-forming] subunit beta OS=Vibrio parahaemolyticus serotype O3:K6 (strain RIMD 2210633) GN=sucC PE=3 SV=1                                                  | 52.8 | 41.5  | 8.80E+07 | 8.10E+07 | 7.40E+07 | 4.90E+07 | 7.80E+07 | 8.00E+07 |
| Q87RE9 | Dihydropyridine-residue succinyltransferase component of 2-oxoglutarate dehydrogenase complex OS=Vibrio parahaemolyticus serotype O3:K6 (strain RIMD 2210633) GN=VP0848 PE=3 SV=1 | 31.4 | 43.7  | 2.40E+07 | 2.40E+07 | 2.10E+07 | 3.60E+06 | 1.40E+07 | 1.80E+07 |
| Q87RF0 | 2-oxoglutarate dehydrogenase, E1 component OS=Vibrio parahaemolyticus serotype O3:K6 (strain RIMD 2210633) GN=VP0847 PE=4 SV=1                                                    | 2.0  | 106.0 |          |          | 2.90E+06 | 3.30E+06 |          |          |
| Q87RF5 | Citrate synthase OS=Vibrio parahaemolyticus serotype O3:K6 (strain RIMD 2210633) GN=VP0842 PE=3 SV=1                                                                              | 5.4  | 48.2  | 1.20E+07 | 1.20E+07 | 1.10E+07 |          |          |          |
| Q87RG2 | Flavodoxin OS=Vibrio parahaemolyticus serotype O3:K6 (strain RIMD 2210633) GN=VP0835 PE=3 SV=1                                                                                    | 10.7 | 19.8  |          |          |          |          | 3.30E+06 |          |
| Q87RG4 | Glutamine-tRNA ligase OS=Vibrio parahaemolyticus serotype O3:K6 (strain RIMD 2210633) GN=glnS PE=3 SV=1                                                                           | 12.9 | 63.9  | 1.40E+07 | 1.70E+07 | 1.50E+07 | 1.10E+07 | 1.90E+07 | 2.30E+07 |
| Q87RH4 | Adenylate kinase OS=Vibrio parahaemolyticus serotype O3:K6 (strain RIMD 2210633) GN=adk PE=3 SV=1                                                                                 | 25.2 | 23.3  | 1.90E+07 | 1.20E+07 | 1.40E+07 | 6.10E+06 | 1.20E+07 | 1.20E+07 |
| Q87RH9 | Uncharacterized protein OS=Vibrio parahaemolyticus serotype O3:K6 (strain RIMD 2210633) GN=VP0805 PE=4 SV=1                                                                       | 13.8 | 33.4  | 1.10E+07 | 1.80E+07 | 6.90E+06 | 1.10E+07 | 2.10E+07 | 2.10E+07 |
| Q87RJ2 | Putative exported protein OS=Vibrio parahaemolyticus serotype O3:K6 (strain RIMD 2210633) GN=VP0802 PE=4 SV=1                                                                     | 2.1  | 51.7  |          |          |          |          | 4.20E+06 | 7.00E+06 |
| Q87RJ7 | Cysteine synthase OS=Vibrio parahaemolyticus serotype O3:K6 (strain RIMD 2210633) GN=VP0797 PE=3 SV=1                                                                             | 84.8 | 34.1  | 2.70E+08 | 2.50E+08 | 2.70E+08 | 1.70E+08 | 3.30E+08 | 3.00E+08 |
| Q87RK1 | PTS system, glucose-specific IIA component OS=Vibrio parahaemolyticus serotype O3:K6 (strain RIMD 2210633) GN=VP0793 PE=4 SV=1                                                    | 8.3  | 17.9  | 7.20E+06 | 7.90E+06 |          |          |          |          |
| Q87RK5 | Polar flagellar hook associated protein type 1 FlgK OS=Vibrio parahaemolyticus serotype O3:K6 (strain RIMD 2210633) GN=VP0785 PE=4 SV=1                                           | 15.3 | 71.2  | 1.30E+07 | 1.50E+07 | 1.20E+07 | 1.20E+07 | 1.50E+07 | 1.70E+07 |
| Q87RL4 | Outer membrane protein OmpA OS=Vibrio parahaemolyticus serotype O3:K6 (strain RIMD 2210633) GN=VP0764 PE=3 SV=1                                                                   | 8.5  | 34.1  | 3.70E+06 | 5.10E+06 | 2.90E+06 |          |          |          |
| Q87RL6 | Glutamate-tRNA ligase OS=Vibrio parahaemolyticus serotype O3:K6 (strain RIMD 2210633) GN=gltX PE=3 SV=1                                                                           | 34.4 | 53.4  | 3.00E+07 | 2.90E+07 | 3.00E+07 | 1.70E+07 | 3.40E+07 | 3.20E+07 |
| Q87RL8 | Putative chitropin OS=Vibrio parahaemolyticus serotype O3:K6 (strain RIMD 2210633) GN=VP0760 PE=4 SV=1                                                                            | 33.8 | 40.8  |          |          |          | 2.00E+07 | 6.20E+07 | 1.80E+07 |
| Q87RM2 | Uncharacterized protein OS=Vibrio parahaemolyticus serotype O3:K6 (strain RIMD 2210633) GN=VP0756 PE=4 SV=1                                                                       | 6.5  | 25.1  |          |          | 2.00E+06 |          |          |          |
| Q87RM3 | N,N'-diacetylchitobiose OS=Vibrio parahaemolyticus serotype O3:K6 (strain RIMD 2210633) GN=VP0755 PE=4 SV=1                                                                       | 13.7 | 97.6  |          |          |          | 9.60E+06 |          | 2.20E+07 |
| Q87RN0 | 2-dehydro-3-deoxyphosphonate aldolase OS=Vibrio parahaemolyticus serotype O3:K6 (strain RIMD 2210633) GN=kdsA PE=3 SV=1                                                           | 18.7 | 30.8  | 7.10E+06 | 6.20E+06 | 9.20E+06 |          | 6.80E+06 | 1.40E+07 |
| Q87RN8 | Ribose-phosphate pyrophosphokinase OS=Vibrio parahaemolyticus serotype O3:K6 (strain RIMD 2210633) GN=pps PE=3 SV=1                                                               | 21.7 | 33.9  | 5.90E+06 | 7.80E+06 | 9.90E+06 | 6.90E+06 | 5.20E+06 | 1.00E+07 |
| Q87RP4 | tRNA-2-methylthio-N(6)-dimethylallyl adenosine synthase OS=Vibrio parahaemolyticus serotype O3:K6 (strain RIMD 2210633) GN=miab PE=3 SV=1                                         | 4.6  | 53.7  |          |          |          |          | 4.40E+06 |          |
| Q87RQ0 | Leucine-tRNA ligase OS=Vibrio parahaemolyticus serotype O3:K6 (strain RIMD 2210633) GN=leuS PE=3 SV=1                                                                             | 17.0 | 96.6  | 8.30E+06 | 7.30E+06 | 1.20E+07 | 8.10E+06 | 1.50E+07 | 1.60E+07 |
| Q87RQ1 | LPS-assembly lipoprotein LptE OS=Vibrio parahaemolyticus serotype O3:K6 (strain RIMD 2210633) GN=lptE PE=3 SV=1                                                                   | 11.7 | 20.5  | 4.70E+06 | 6.50E+06 |          | 3.10E+06 | 5.70E+06 | 3.60E+06 |
| Q87RR2 | Serine hydroxymethyltransferase 1 OS=Vibrio parahaemolyticus serotype O3:K6 (strain RIMD 2210633) GN=glyA1 PE=3 SV=1                                                              | 11.1 | 45.5  | 1.20E+07 | 1.60E+07 | 1.50E+07 | 5.60E+06 | 1.10E+07 |          |
| Q87RS3 | Lipoprotein OS=Vibrio parahaemolyticus serotype O3:K6 (strain RIMD 2210633) GN=VP0704 PE=3 SV=1                                                                                   | 48.0 | 29.1  | 2.50E+07 | 2.50E+07 | 2.00E+07 | 1.60E+07 | 1.50E+07 | 2.00E+07 |
| Q87RU4 | 6,7-dimethyl-8-ribitylmuramine synthase OS=Vibrio parahaemolyticus serotype O3:K6 (strain RIMD 2210633) GN=rhB PE=3 SV=1                                                          | 37.8 | 16.4  | 7.90E+06 | 7.50E+06 | 7.50E+06 | 6.10E+06 | 9.70E+06 | 8.10E+06 |
| Q87RV5 | 3,4-dihydroxy-2-butanone 4-phosphate synthase OS=Vibrio parahaemolyticus serotype O3:K6 (strain RIMD 2210633) GN=rhB PE=3 SV=1                                                    | 8.4  | 40.1  | 2.80E+06 | 2.40E+06 | 3.20E+06 | 2.10E+06 | 3.80E+06 | 3.50E+06 |
| Q87RV6 | Aminoacyl-histidine peptidase OS=Vibrio parahaemolyticus serotype O3:K6 (strain RIMD 2210633) GN=VP0671 PE=4 SV=1                                                                 | 7.1  | 53.6  | 7.30E+06 | 6.00E+06 | 4.90E+06 | 6.40E+06 | 6.40E+06 | 5.30E+06 |
| Q87RV7 | Uncharacterized protein OS=Vibrio parahaemolyticus serotype O3:K6 (strain RIMD 2210633) GN=VP0669 PE=4 SV=1                                                                       | 11.0 | 39.0  |          |          | 4.70E+06 | 2.60E+06 | 8.10E+06 | 5.50E+06 |
| Q87RW0 | Phosphoribosylformylglycinamide synthase OS=Vibrio parahaemolyticus serotype O3:K6 (strain RIMD 2210633) GN=purL PE=3 SV=1                                                        | 1.0  | 141.6 |          |          | 4.80E+06 | 6.10E+06 | 3.70E+06 |          |
| Q87RW7 | Uncharacterized protein OS=Vibrio parahaemolyticus serotype O3:K6 (strain RIMD 2210633) GN=VP0659 PE=4 SV=1                                                                       | 2.5  | 47.4  |          |          |          |          | 7.90E+06 | 9.60E+06 |
| Q87RX3 | Chaperone protein DnaK OS=Vibrio parahaemolyticus serotype O3:K6 (strain RIMD 2210633) GN=dnaK PE=3 SV=1                                                                          | 48.7 | 69.0  | 3.10E+07 | 3.10E+07 | 2.90E+07 | 1.70E+07 | 2.60E+07 | 3.30E+07 |
| Q87RX8 | DNA repair protein RecN OS=Vibrio parahaemolyticus serotype O3:K6 (strain RIMD 2210633) GN=VP0648 PE=3 SV=1                                                                       | 5.1  | 61.4  |          |          |          |          |          |          |
| Q87S05 | Putative chitinase OS=Vibrio parahaemolyticus serotype O3:K6 (strain RIMD 2210633) GN=VP0619 PE=4 SV=1                                                                            | 43.9 | 63.5  | 2.10E+07 | 2.20E+07 | 4.60E+07 | 2.80E+07 | 2.40E+07 | 2.50E+07 |
| Q87S07 | GMP synthase [glutamine-hydrolyzing] OS=Vibrio parahaemolyticus serotype O3:K6 (strain RIMD 2210633) GN=guaA PE=3 SV=1                                                            | 9.1  | 57.6  | 7.80E+06 | 8.10E+06 | 9.90E+06 | 5.80E+06 | 1.10E+07 | 1.40E+07 |
| Q87S08 | Inosine-5'-monophosphate dehydrogenase OS=Vibrio parahaemolyticus serotype O3:K6 (strain RIMD 2210633) GN=guaB PE=3 SV=1                                                          | 2.9  | 51.9  |          |          |          |          |          | 2.00E+06 |
| Q87S13 | Outer membrane protein assembly factor BamB OS=Vibrio parahaemolyticus serotype O3:K6 (strain RIMD 2210633) GN=bamB PE=3 SV=1                                                     | 2.1  | 41.5  |          |          | 6.00E+06 | 6.40E+06 |          | 6.20E+06 |
| Q87S31 | Inositol monophosphate family protein OS=Vibrio parahaemolyticus serotype O3:K6 (strain RIMD 2210633) GN=VP0593 PE=4 SV=1                                                         | 9.4  | 29.1  | 2.50E+06 | 2.50E+06 | 5.40E+06 |          | 6.00E+06 | 5.70E+06 |
| Q87S33 | Uncharacterized protein OS=Vibrio parahaemolyticus serotype O3:K6 (strain RIMD 2210633) GN=VP0589 PE=4 SV=1                                                                       | 11.9 | 11.8  | 1.20E+07 | 1.20E+07 |          | 7.90E+06 |          | 1.10E+07 |
| Q87S40 | Isochorate lyase OS=Vibrio parahaemolyticus serotype O3:K6 (strain RIMD 2210633) GN=VP0584 PE=4 SV=1                                                                              | 13.8 | 48.0  | 1.50E+07 | 9.50E+06 |          | 4.30E+06 | 5.00E+06 | 1.40E+07 |
| Q87S44 | Antioxidant, AhpK/1sa family OS=Vibrio parahaemolyticus serotype O3:K6 (strain RIMD 2210633) GN=VP0580 PE=4 SV=1                                                                  | 51.7 | 22.2  | 1.00E+08 | 1.20E+08 | 1.40E+08 | 7.80E+07 | 1.10E+08 | 1.20E+08 |
| Q87S63 | Chaperone protein CtpB OS=Vibrio parahaemolyticus serotype O3:K6 (strain RIMD 2210633) GN=ctpB PE=3 SV=1                                                                          | 0.9  | 95.8  |          |          |          |          |          | 3.10E+06 |
| Q87S84 | Putative carbon starvation protein A OS=Vibrio parahaemolyticus serotype O3:K6 (strain RIMD 2210633) GN=VP0540 PE=4 SV=1                                                          | 2.4  | 53.3  | 6.70E+06 | 7.40E+06 | 6.00E+06 | 3.30E+06 | 3.80E+06 | 4.10E+06 |
| Q87S99 | Uncharacterized protein OS=Vibrio parahaemolyticus serotype O3:K6 (strain RIMD 2210633) GN=VP0525 PE=4 SV=1                                                                       | 13.2 | 43.9  | 7.90E+06 |          | 9.40E+06 | 5.60E+06 | 1.10E+07 | 8.00E+06 |
| Q87SA8 | Oxidoreductase Tas, aldo/keto reductase family OS=Vibrio parahaemolyticus serotype O3:K6 (strain RIMD 2210633) GN=VP0516 PE=4 SV=1                                                | 22.7 | 39.7  | 1.40E+07 | 1.60E+07 | 1.90E+07 | 1.20E+07 | 2.60E+07 | 2.60E+07 |
| Q87SB4 | Thiol-disulfide interchange protein DsbC OS=Vibrio parahaemolyticus serotype O3:K6 (strain RIMD 2210633) GN=VP0510 PE=4 SV=1                                                      | 4.2  | 28.6  |          |          | 5.50E+06 |          |          | 4.90E+06 |
| Q87SCT | Autonomous glycol radical cofactor OS=Vibrio parahaemolyticus serotype O3:K6 (strain RIMD 2210633) GN=frgCA PE=3 SV=1                                                             | 7.2  | 13.9  | 4.80E+06 |          | 7.00E+06 | 2.00E+06 |          |          |
| Q87SC8 | Threonine synthase OS=Vibrio parahaemolyticus serotype O3:K6 (strain RIMD 2210633) GN=VP0496 PE=4 SV=1                                                                            | 6.1  | 46.5  | 8.80E+06 | 7.70E+06 | 1.00E+07 | 4.90E+06 | 8.60E+06 | 7.80E+06 |
| Q87SC9 | Homoserine kinase OS=Vibrio parahaemolyticus serotype O3:K6 (strain RIMD 2210633) GN=thrB PE=3 SV=1                                                                               | 2.8  | 34.4  | 8.00E+06 | 7.70E+06 | 1.60E+07 | 9.80E+06 | 2.10E+07 | 1.90E+07 |
| Q87SD2 | Putative 4-hydroxy-4-methyl-2-oxoglutarate aldolase OS=Vibrio parahaemolyticus serotype O3:K6 (strain RIMD 2210633) GN=VP0492 PE=3 SV=1                                           | 6.3  | 17.7  | 5.00E+06 |          |          |          |          |          |
| Q87SD6 | Putative DNA polymerase III, beta chain OS=Vibrio parahaemolyticus serotype O3:K6 (strain RIMD 2210633) GN=VP0488 PE=4 SV=1                                                       | 8.4  | 17.3  | 6.30E+07 | 8.40E+07 |          |          | 3.10E+07 |          |
| Q87SE0 | Glutamate synthase, large subunit OS=Vibrio parahaemolyticus serotype O3:K6 (strain RIMD 2210633) GN=VP0484 PE=4 SV=1                                                             | 5.2  | 175.2 |          |          | 8.50E+06 | 6.70E+06 | 7.60E+06 | 9.70E+06 |
| Q87SE2 | Glutamate synthase, large subunit OS=Vibrio parahaemolyticus serotype O3:K6 (strain RIMD 2210633) GN=VP0482 PE=4 SV=1                                                             | 9.3  | 162.9 | 1.10E+07 | 8.50E+06 | 9.90E+06 | 5.70E+06 | 9.00E+06 | 8.80E+06 |
| Q87SE3 | Glutamate synthase, small subunit OS=Vibrio parahaemolyticus serotype O3:K6 (strain RIMD 2210633) GN=VP0481 PE=4 SV=1                                                             | 7.2  | 52.5  | 5.10E+06 | 2.80E+06 |          |          |          | 5.70E+06 |
| Q87SF3 | Carbamoyl-phosphate synthase large chain OS=Vibrio parahaemolyticus serotype O3:K6 (strain RIMD 2210633) GN=carB PE=3 SV=1                                                        | 2.1  | 117.8 | 4.30E+06 | 5.40E+06 | 5.80E+06 | 2.80E+06 | 4.40E+06 | 1.10E+07 |
| Q87SF5 | 4-hydroxy-tetrahydronicotinamide reductase OS=Vibrio parahaemolyticus serotype O3:K6 (strain RIMD 2210633) GN=dapB PE=3 SV=1                                                      | 26.4 | 28.6  | 2.40E+07 | 2.00E+07 | 1.70E+07 | 1.60E+07 | 1.70E+07 | 2.20E+07 |
| Q87SG0 | Cell division protein FtsZ OS=Vibrio parahaemolyticus serotype O3:K6 (strain RIMD 2210633) GN=ftsZ PE=3 SV=1                                                                      | 2.9  | 42.5  |          |          | 4.90E+06 |          |          |          |
| Q87SH4 | Penicillin-binding protein activator LpoA OS=Vibrio parahaemolyticus serotype O3:K6 (strain RIMD 2210633) GN=lpoA PE=3 SV=1                                                       | 2.5  | 67.5  |          |          | 6.00E+06 |          |          |          |
| Q87SH9 | Stringent starvation protein A OS=Vibrio parahaemolyticus serotype O3:K6 (strain RIMD 2210633) GN=VP0444 PE=3 SV=1                                                                | 12.3 | 24.3  | 7.70E+06 | 8.50E+06 | 6.30E+06 | 4.10E+06 | 6.90E+06 | 7.80E+06 |
| Q87S14 | 30S ribosomal protein S9 OS=Vibrio parahaemolyticus serotype O3:K6 (strain RIMD 2210633) GN=rpsL PE=3 SV=1                                                                        | 40.0 | 14.6  | 1.40E+07 | 1.30E+07 | 1.40E+07 | 8.40E+06 | 1.20E+07 | 1.10E+07 |
| Q87S15 | 50S ribosomal protein L13 OS=Vibrio parahaemolyticus serotype O3:K6 (strain RIMD 2210633) GN=rplM PE=3 SV=1                                                                       | 12.7 | 16.0  | 8.10E+06 | 9.10E+06 | 1.00E+07 | 6.80E+06 | 7.60E+06 | 6.90E+06 |
| Q87S19 | Uncharacterized protein OS=Vibrio parahaemolyticus serotype O3:K6 (strain RIMD 2210633) GN=VP0434 PE=4 SV=1                                                                       | 13.6 | 16.5  |          |          | 8.50E+06 |          | 4.90E+06 |          |
| Q87SJ0 | Protease DO OS=Vibrio parahaemolyticus serotype O3:K6 (strain RIMD 2210633) GN=VP0433 PE=4 SV=1                                                                                   | 14.5 | 48.1  | 7.80E+06 | 1.30E+07 | 1.20E+07 | 8.30E+06 | 5.10E+06 | 1.10E+07 |
| Q87SJ8 | Outer membrane protein TolC OS=Vibrio parahaemolyticus serotype O3:K6 (strain RIMD 2210633) GN=VP0425 PE=4 SV=1                                                                   | 36.2 | 48.0  | 1.90E+07 | 1.80E+07 | 1.50E+07 | 9.70E+06 | 1.40E+07 | 1.20E+07 |
| Q87SK3 | Uncharacterized protein OS=Vibrio parahaemolyticus serotype O3:K6 (strain RIMD 2210633) GN=VP0420 PE=4 SV=1                                                                       | 7.0  | 59.2  | 2.50E+06 |          | 2.90E+06 |          | 3.90E+06 | 2.60E+06 |
| Q87SL6 | Uncharacterized protein OS=Vibrio parahaemolyticus serotype O3:K6 (strain RIMD 2210633) GN=VP0406 PE=4 SV=1                                                                       | 7.5  | 16.1  |          |          |          |          |          |          |
| Q87SR6 | Pyruvate kinase OS=Vibrio parahaemolyticus serotype O3:K6 (strain RIMD 2210633) GN=pps PE=3 SV=1                                                                                  | 10.2 | 49.9  | 9.20E+06 | 1.10E+07 | 9.80E+06 | 8.40E+06 | 1.10E+07 | 1.10E+07 |
| Q87SS8 | 3-isopropylmalate dehydrogenase OS=Vibrio parahaemolyticus serotype O3:K6 (strain RIMD 2210633) GN=leuB PE=3 SV=1                                                                 | 44.9 | 39.3  | 4.30E+07 | 3.90E+07 | 3.70E+07 | 2.70E+07 | 4.70E+07 | 4.90E+07 |
| Q87ST3 | LPS-assembly protein LptD OS=Vibrio parahaemolyticus serotype O3                                                                                                                  |      |       |          |          |          |          |          |          |

Table S1

| Accession                               | Description                                                                                                                                                 | Coverage | MW [kDa] | Control  | Q1cNo    | Q1cN     | (Q1cNo)2 | (Q1cN)2  | Q1cNo-Q1cN |  |
|-----------------------------------------|-------------------------------------------------------------------------------------------------------------------------------------------------------------|----------|----------|----------|----------|----------|----------|----------|------------|--|
| Q87T13                                  | 50S ribosomal protein L3 OS=Vibrio parahaemolyticus serotype O3:K6 (strain RIMD 2210633) GN=rpL3 PE=3 SV=1                                                  | 13.4     | 22.4     | 1.80E+07 | 1.50E+07 | 1.80E+07 | 8.60E+06 | 8.30E+06 |            |  |
| Q87T23                                  | Regulator of ribonucleic acid activity A OS=Vibrio parahaemolyticus serotype O3:K6 (strain RIMD 2210633) GN=rraA PE=3 SV=1                                  | 6.5      | 18.4     | 8.30E+06 |          |          |          |          |            |  |
| Q87T31                                  | Triosephosphate isomerase OS=Vibrio parahaemolyticus serotype O3:K6 (strain RIMD 2210633) GN=tpiA PE=3 SV=1                                                 | 23.0     | 26.9     | 3.20E+07 | 3.50E+07 | 3.00E+07 | 2.10E+07 | 1.30E+07 | 3.90E+07   |  |
| Q87T36                                  | Plin glycosylation protein OS=Vibrio parahaemolyticus serotype O3:K6 (strain RIMD 2210633) GN=VP0234 PE=3 SV=1                                              | 43.2     | 43.4     | 4.40E+07 | 4.60E+07 | 4.40E+07 | 3.20E+07 | 5.40E+07 | 5.30E+07   |  |
| Q87T41                                  | 4TDP-4-dehydrohamnose 3,5-epimerase OS=Vibrio parahaemolyticus serotype O3:K6 (strain RIMD 2210633) GN=VP0229 PE=4 SV=1                                     | 38.5     | 21.2     | 7.60E+06 | 1.10E+07 | 9.60E+06 | 8.40E+06 | 9.60E+06 | 7.30E+06   |  |
| Q87T51                                  | Uncharacterized protein OS=Vibrio parahaemolyticus serotype O3:K6 (strain RIMD 2210633) GN=VP0219 PE=4 SV=1                                                 | 8.0      | 20.6     | 7.60E+06 | 8.10E+06 | 6.20E+06 |          |          |            |  |
| Q87T56                                  | ADP-L-glycero-D-manno-heptose-6-epimerase OS=Vibrio parahaemolyticus serotype O3:K6 (strain RIMD 2210633) GN=hhd PE=3 SV=1                                  | 4.2      | 35.2     |          |          | 6.90E+06 |          |          |            |  |
| Q87T64                                  | Putative amidohydrolase OS=Vibrio parahaemolyticus serotype O3:K6 (strain RIMD 2210633) GN=VP0208 PE=4 SV=1                                                 | 7.4      | 30.7     | 6.20E+06 | 4.60E+06 | 8.50E+06 |          | 4.30E+06 |            |  |
| Q87T66                                  | Putative 3-chlorobenzoate-3,4-dioxygenase dyhydrogenase related protein OS=Vibrio parahaemolyticus serotype O3:K6 (strain RIMD 2210633) GN=VP0204 PE=4 SV=1 | 11.1     | 38.5     | 6.90E+06 |          |          |          | 8.20E+06 | 9.30E+06   |  |
| Q87T85                                  | 50S ribosomal protein L28 OS=Vibrio parahaemolyticus serotype O3:K6 (strain RIMD 2210633) GN=rpL28 PE=3 SV=1                                                | 12.8     | 9.0      | 1.00E+07 | 1.20E+07 | 1.70E+07 |          | 1.40E+07 | 1.10E+07   |  |
| Q87T94                                  | Putative alpha helix protein OS=Vibrio parahaemolyticus serotype O3:K6 (strain RIMD 2210633) GN=VP0176 PE=4 SV=1                                            | 2.1      | 33.2     |          |          |          |          |          |            |  |
| Q87T98                                  | Putative binding protein component of ABC transporter OS=Vibrio parahaemolyticus serotype O3:K6 (strain RIMD 2210633) GN=VP0172 PE=4 SV=1                   | 4.8      | 69.6     | 3.30E+06 |          |          | 1.40E+07 |          | 1.50E+07   |  |
| Q87T44                                  | Putative Tdr OS=Vibrio parahaemolyticus serotype O3:K6 (strain RIMD 2210633) GN=VP0166 PE=3 SV=1                                                            | 5.5      | 49.3     | 8.90E+06 | 8.10E+06 | 5.30E+06 | 4.10E+06 |          |            |  |
| Q87T89                                  | Uncharacterized protein OS=Vibrio parahaemolyticus serotype O3:K6 (strain RIMD 2210633) GN=VP0151 PE=4 SV=1                                                 | 3.4      | 70.4     | 3.90E+06 | 6.10E+06 |          |          | 6.30E+06 | 6.30E+06   |  |
| Q87T1E                                  | Phosphoenolpyruvate carboxylase [ATP] OS=Vibrio parahaemolyticus serotype O3:K6 (strain RIMD 2210633) GN=pckA PE=3 SV=1                                     | 72.1     | 60.0     | 1.30E+08 | 1.40E+08 | 1.00E+08 | 9.60E+07 | 1.20E+08 | 1.30E+08   |  |
| Q87T1E8                                 | Glutamine synthetase OS=Vibrio parahaemolyticus serotype O3:K6 (strain RIMD 2210633) GN=vpd121 PE=3 SV=1                                                    | 54.4     | 51.5     | 1.60E+08 | 1.70E+08 | 1.70E+08 | 1.30E+08 | 2.10E+08 | 2.20E+08   |  |
| Q87T7G                                  | Delta-aminolevulinic acid dehydratase OS=Vibrio parahaemolyticus serotype O3:K6 (strain RIMD 2210633) GN=VP0104 PE=3 SV=1                                   | 17.0     | 39.2     | 1.30E+07 | 1.40E+07 | 1.50E+07 | 8.70E+06 | 1.60E+07 | 1.40E+07   |  |
| Q87TJ9                                  | Oligopeptidase A OS=Vibrio parahaemolyticus serotype O3:K6 (strain RIMD 2210633) GN=VP0070 PE=3 SV=1                                                        | 17.1     | 76.9     | 2.40E+07 | 1.20E+08 | 3.60E+07 | 9.40E+07 | 1.30E+08 | 1.40E+08   |  |
| Q87TK1                                  | Glutathione reductase OS=Vibrio parahaemolyticus serotype O3:K6 (strain RIMD 2210633) GN=VP0068 PE=3 SV=1                                                   | 28.6     | 49.2     | 5.00E+07 | 4.80E+07 | 4.50E+07 | 3.40E+07 | 5.70E+07 | 5.80E+07   |  |
| Q87TM1                                  | Peptide ABC transporter, periplasmic peptide-binding protein OS=Vibrio parahaemolyticus serotype O3:K6 (strain RIMD 2210633) GN=VP0048 PE=4 SV=1            | 70.8     | 57.4     | 2.60E+08 | 3.00E+08 | 3.10E+08 | 2.30E+08 | 3.80E+08 | 3.80E+08   |  |
| Q87TM2                                  | Peptide ABC transporter, ATP-binding protein OS=Vibrio parahaemolyticus serotype O3:K6 (strain RIMD 2210633) GN=VP0047 PE=3 SV=1                            | 1.8      | 63.7     |          |          |          |          |          |            |  |
| Q87TN4                                  | Ketol-acid reductoisomerase OS=Vibrio parahaemolyticus serotype O3:K6 (strain RIMD 2210633) GN=ivc PE=3 SV=1                                                | 57.5     | 54.7     | 9.10E+07 | 1.00E+08 | 9.30E+07 | 7.00E+07 | 1.20E+08 | 1.40E+08   |  |
| Q87TR0                                  | Amino acid ABC transporter, periplasmic amino acid-binding portion OS=Vibrio parahaemolyticus serotype O3:K6 (strain RIMD 2210633) GN=VP0008 PE=3 SV=1      | 46.4     | 27.5     | 1.50E+07 | 1.40E+07 | 2.00E+07 | 1.00E+07 | 1.80E+07 | 2.60E+07   |  |
| Q9289                                   | Thermolabile hemolysin OS=Vibrio parahaemolyticus serotype O3:K6 (strain RIMD 2210633) GN=VPA0226 PE=1 SV=2                                                 | 10.3     | 47.4     | 4.80E+07 |          |          |          | 1.10E+07 |            |  |
| Q9ALY5                                  | Cyclic AMP receptor protein OS=Vibrio parahaemolyticus serotype O3:K6 (strain RIMD 2210633) GN=VP2793 PE=3 SV=2                                             | 36.2     | 23.7     | 1.50E+07 | 2.00E+07 | 2.40E+07 | 7.90E+06 | 2.50E+07 | 2.00E+07   |  |
| Q9L7P5                                  | 60 kDa chaperonin 1 OS=Vibrio parahaemolyticus serotype O3:K6 (strain RIMD 2210633) GN=groL PE=3 SV=2                                                       | 46.4     | 57.5     | 5.50E+07 | 5.10E+07 | 5.40E+07 | 3.80E+07 | 6.20E+07 | 7.30E+07   |  |
| Q9ZBA2                                  | Polar flagellin E OS=Vibrio parahaemolyticus serotype O3:K6 (strain RIMD 2210633) GN=flaE PE=3 SV=2                                                         | 1.6      | 40.7     | 6.80E+06 | 1.50E+07 | 1.40E+07 |          | 1.40E+07 | 1.70E+07   |  |
| <b>2nd Experiment (Souble Fraction)</b> |                                                                                                                                                             |          |          |          |          |          |          |          |            |  |
| A7UEM1                                  | Transhydrogenase alpha subunit (Fragment) OS=Vibrio parahaemolyticus GN=prtA PE=4 SV=1                                                                      | 7.0      | 15.5     |          |          |          |          |          |            |  |
| A7UET7                                  | Protein RecA (Fragment) OS=Vibrio parahaemolyticus GN=recA PE=3 SV=1                                                                                        | 39.1     | 26.0     | 9.30E+06 | 3.80E+06 | 1.30E+07 | 1.20E+07 | 1.70E+07 | 1.30E+07   |  |
| A7UEX3                                  | DNA gyrase beta-subunit (Fragment) OS=Vibrio parahaemolyticus GN=gyrB PE=4 SV=1                                                                             | 5.1      | 21.7     | 5.70E+06 |          |          |          |          |            |  |
| A9G6J2                                  | Protein RecA (Fragment) OS=Vibrio parahaemolyticus GN=recA PE=3 SV=1                                                                                        | 33.6     | 22.4     | 9.30E+06 | 4.30E+06 | 1.30E+07 | 1.20E+07 | 1.70E+07 | 1.30E+07   |  |
| A9G6M1                                  | DNA gyrase B subunit (Fragment) OS=Vibrio parahaemolyticus GN=gyrB PE=4 SV=1                                                                                | 5.9      | 18.6     | 5.70E+06 |          |          |          |          |            |  |
| A9G6Q3                                  | Phosphoglucomutase (Fragment) OS=Vibrio parahaemolyticus GN=pgm PE=3 SV=1                                                                                   | 18.9     | 21.2     |          | 8.20E+06 | 1.00E+07 | 8.20E+06 | 1.20E+07 | 1.10E+07   |  |
| H6BAQ3                                  | Protein RecA (Fragment) OS=Vibrio parahaemolyticus GN=recA PE=3 SV=1                                                                                        | 35.1     | 18.0     | 7.90E+06 | 4.30E+06 | 1.10E+07 | 1.30E+07 | 1.40E+07 | 1.10E+07   |  |
| O50286                                  | Dihydrodipoloyl dehydrogenase OS=Vibrio parahaemolyticus serotype O3:K6 (strain RIMD 2210633) GN=lpd PE=3 SV=2                                              | 48.2     | 51.0     | 1.60E+07 | 2.40E+07 | 2.20E+07 | 2.20E+07 | 3.10E+07 | 2.50E+07   |  |
| O51859                                  | DNA gyrase subunit B OS=Vibrio parahaemolyticus serotype O3:K6 (strain RIMD 2210633) GN=gyrB PE=3 SV=2                                                      | 4.0      | 89.4     | 5.70E+06 | 5.70E+06 |          |          | 5.10E+06 | 3.70E+06   |  |
| POA2W2                                  | Acyl carrier protein OS=Vibrio parahaemolyticus serotype O3:K6 (strain RIMD 2210633) GN=accp PE=3 SV=2                                                      | 18.2     | 8.5      | 3.70E+06 | 4.90E+06 | 5.60E+06 | 2.80E+07 | 3.10E+07 | 2.20E+07   |  |
| P22095                                  | Tryptophan synthase alpha chain OS=Vibrio parahaemolyticus serotype O3:K6 (strain RIMD 2210633) GN=trpA PE=3 SV=2                                           | 7.1      | 28.6     |          |          |          | 6.50E+06 | 6.80E+06 |            |  |
| P22097                                  | Tryptophan synthase beta chain 1 OS=Vibrio parahaemolyticus serotype O3:K6 (strain RIMD 2210633) GN=trpB1 PE=3 SV=2                                         | 2.3      | 43.0     |          |          |          | 6.40E+06 | 6.10E+06 |            |  |
| P22099                                  | Anthraxinlike synthase component 1 OS=Vibrio parahaemolyticus serotype O3:K6 (strain RIMD 2210633) GN=trpE PE=3 SV=2                                        | 1.8      | 59.7     |          |          |          | 2.70E+06 |          |            |  |
| PA4067                                  | Adenylosuccinate synthetase OS=Vibrio parahaemolyticus serotype O3:K6 (strain RIMD 2210633) GN=pspA PE=3 SV=3                                               | 31.3     | 47.7     | 8.90E+06 | 1.60E+07 | 1.30E+07 | 1.20E+07 | 1.80E+07 | 1.60E+07   |  |
| P46235                                  | Probable lactylglutathione lyase OS=Vibrio parahaemolyticus serotype O3:K6 (strain RIMD 2210633) GN=glgA PE=3 SV=2                                          | 19.6     | 15.0     |          | 9.10E+05 |          |          |          |            |  |
| P59494                                  | Maltoporin OS=Vibrio parahaemolyticus serotype O3:K6 (strain RIMD 2210633) GN=lamB PE=3 SV=1                                                                | 32.2     | 46.9     | 2.90E+07 | 2.20E+07 | 2.90E+07 | 2.40E+07 | 4.50E+07 | 3.60E+07   |  |
| P59570                                  | Outer membrane protein OmpK OS=Vibrio parahaemolyticus serotype O3:K6 (strain RIMD 2210633) GN=ompK PE=3 SV=1                                               | 8.6      | 29.9     | 3.10E+06 |          |          |          | 4.60E+06 | 4.80E+06   |  |
| P59605                                  | Argininosuccinate synthase OS=Vibrio parahaemolyticus serotype O3:K6 (strain RIMD 2210633) GN=argG PE=3 SV=1                                                | 48.3     | 44.5     | 3.10E+07 | 3.80E+07 | 3.70E+07 | 4.70E+07 | 6.10E+07 | 4.80E+07   |  |
| P59620                                  | Bifunctional protein ArgH OS=Vibrio parahaemolyticus serotype O3:K6 (strain RIMD 2210633) GN=argH PE=3 SV=1                                                 | 22.9     | 69.3     | 4.20E+06 | 6.70E+06 | 6.40E+06 | 8.60E+06 | 8.50E+06 | 8.50E+06   |  |
| P66478                                  | 30S ribosomal protein S18 OS=Vibrio parahaemolyticus serotype O3:K6 (strain RIMD 2210633) GN=rrsP PE=3 SV=1                                                 | 40.0     | 8.8      | 1.10E+07 | 1.10E+07 | 1.70E+07 | 2.10E+07 | 2.10E+07 | 1.70E+07   |  |
| P74956                                  | Lon protease OS=Vibrio parahaemolyticus serotype O3:K6 (strain RIMD 2210633) GN=lon PE=3 SV=2                                                               | 11.2     | 87.8     | 3.80E+06 | 5.50E+06 | 7.00E+06 | 5.20E+06 | 8.70E+06 | 7.10E+06   |  |
| Q79YV4                                  | OpaR OS=Vibrio parahaemolyticus serotype O3:K6 (strain RIMD 2210633) GN=VP2516 PE=4 SV=1                                                                    | 5.9      | 23.6     |          |          |          |          | 4.80E+06 |            |  |
| Q79YX4                                  | Chemotaxis protein CheW OS=Vibrio parahaemolyticus serotype O3:K6 (strain RIMD 2210633) GN=VP2225 PE=4 SV=1                                                 | 29.3     | 18.4     | 4.40E+06 | 6.00E+06 | 4.70E+07 | 2.70E+07 | 8.10E+06 | 7.80E+06   |  |
| Q79YV3                                  | BfdA OS=Vibrio parahaemolyticus serotype O3:K6 (strain RIMD 2210633) GN=VP1393 PE=4 SV=1                                                                    | 17.4     | 19.4     |          |          | 5.80E+06 |          | 5.80E+06 |            |  |
| Q79YV2                                  | Chemotaxis CheV OS=Vibrio parahaemolyticus serotype O3:K6 (strain RIMD 2210633) GN=VP0773 PE=4 SV=1                                                         | 2.6      | 34.1     |          |          |          | 2.80E+06 |          | 2.80E+06   |  |
| Q87T75                                  | Elongation factor Tu OS=Vibrio parahaemolyticus serotype O3:K6 (strain RIMD 2210633) GN=elF4 PE=3 SV=1                                                      | 64.2     | 43.1     | 1.20E+08 | 1.80E+08 | 1.70E+08 | 3.00E+08 | 3.40E+08 | 2.50E+08   |  |
| Q87FC8                                  | ParB family protein OS=Vibrio parahaemolyticus serotype O3:K6 (strain RIMD 2210633) GN=VPA1751 PE=4 SV=1                                                    | 3.7      | 35.7     |          | 1.30E+06 | 1.80E+06 | 1.70E+06 | 1.30E+06 |            |  |
| Q87F7                                   | Transcriptional regulator, AraC/XylS family OS=Vibrio parahaemolyticus serotype O3:K6 (strain RIMD 2210633) GN=VPA1727 PE=4 SV=1                            | 3.3      | 30.3     |          |          |          |          |          | 6.70E+06   |  |
| Q87FF4                                  | Uncharacterized protein OS=Vibrio parahaemolyticus serotype O3:K6 (strain RIMD 2210633) GN=VPA1725 PE=4 SV=1                                                | 5.1      | 25.5     |          | 2.80E+06 |          |          |          |            |  |
| Q87L7                                   | Putative diaminopimelate decarboxylase protein OS=Vibrio parahaemolyticus serotype O3:K6 (strain RIMD 2210633) GN=VPA1662 PE=3 SV=1                         | 31.8     | 45.3     | 1.70E+07 | 2.50E+07 | 2.60E+07 | 2.20E+07 | 3.20E+07 | 2.70E+07   |  |
| Q87FL8                                  | Putative AcsD OS=Vibrio parahaemolyticus serotype O3:K6 (strain RIMD 2210633) GN=VPA1661 PE=4 SV=1                                                          | 11.8     | 69.4     | 8.20E+06 | 1.20E+07 | 1.20E+07 | 9.10E+06 | 1.40E+07 | 1.10E+07   |  |
| Q87FM0                                  | Uncharacterized protein OS=Vibrio parahaemolyticus serotype O3:K6 (strain RIMD 2210633) GN=VPA1659 PE=4 SV=1                                                | 48.5     | 68.7     | 5.20E+07 | 7.90E+07 | 7.50E+07 | 6.70E+07 | 9.20E+07 | 7.60E+07   |  |
| Q87FM1                                  | Uncharacterized protein OS=Vibrio parahaemolyticus serotype O3:K6 (strain RIMD 2210633) GN=VPA1658 PE=4 SV=1                                                | 36.2     | 44.2     | 3.70E+07 | 5.70E+07 | 5.50E+07 | 5.70E+07 | 7.20E+07 | 6.40E+07   |  |
| Q87FM2                                  | Ferric siderophore receptor homolog OS=Vibrio parahaemolyticus serotype O3:K6 (strain RIMD 2210633) GN=VPA1657 PE=3 SV=1                                    | 10.6     | 74.9     |          | 5.40E+06 | 7.60E+06 | 5.90E+06 | 7.40E+06 | 8.90E+06   |  |
| Q87FM3                                  | Ferric vibrioferrin receptor OS=Vibrio parahaemolyticus serotype O3:K6 (strain RIMD 2210633) GN=VPA1656 PE=3 SV=1                                           | 9.6      | 78.8     |          | 4.50E+06 | 5.30E+06 | 5.30E+06 | 7.20E+06 | 9.20E+06   |  |
| Q87FN1                                  | Uncharacterized protein OS=Vibrio parahaemolyticus serotype O3:K6 (strain RIMD 2210633) GN=VPA1648 PE=4 SV=1                                                | 6.3      | 62.7     |          | 2.00E+06 | 2.80E+06 | 3.10E+06 | 3.60E+06 | 3.00E+06   |  |
| Q87FG8                                  | Alpha-1,4-glucan phosphorylase OS=Vibrio parahaemolyticus serotype O3:K6 (strain RIMD 2210633) GN=VPA1620 PE=3 SV=1                                         | 23.0     | 92.3     | 1.50E+07 | 1.70E+07 | 2.00E+07 | 1.20E+07 | 2.80E+07 | 1.30E+07   |  |
| Q87FG9                                  | 4-alpha-glucanotransferase OS=Vibrio parahaemolyticus serotype O3:K6 (strain RIMD 2210633) GN=VPA1619 PE=3 SV=1                                             | 20.7     | 81.8     | 7.60E+06 | 8.90E+06 | 8.40E+06 | 7.50E+06 | 1.00E+07 | 6.00E+06   |  |
| Q87FR0                                  | 1,4-alpha-glucan branching enzyme GlgB OS=Vibrio parahaemolyticus serotype O3:K6 (strain RIMD 2210633) GN=glgB PE=3 SV=1                                    | 1.3      | 87.4     |          |          |          |          | 5.80E+06 |            |  |
| Q87FR6                                  | Uncharacterized protein OS=Vibrio parahaemolyticus serotype O3:K6 (strain RIMD 2210633) GN=VPA1572 PE=4 SV=1                                                | 19.8     | 41.8     | 3.20E+06 | 2.40E+06 | 3.80E+06 | 6.40E+06 | 7.40E+06 | 7.50E+06   |  |
| Q87G18                                  | L-lactate dehydrogenase OS=Vibrio parahaemolyticus serotype O3:K6 (strain RIMD 2210633) GN=lldD PE=3 SV=1                                                   | 2.9      | 41.4     |          |          |          |          | 3.40E+06 | 1.90E+06   |  |
| Q87G21                                  | Prolyl endopeptidase OS=Vibrio parahaemolyticus serotype O3:K6 (strain RIMD 2210633) GN=VPA1496 PE=4 SV=1                                                   | 14.5     | 76.0     | 2.10E+06 | 4.20E+06 | 5.90E+06 | 4.50E+06 | 9.80E+06 | 7.10E+06   |  |
| Q87G42                                  | Purine nucleoside phosphorylase DeoD-type 2 OS=Vibrio parahaemolyticus serotype O3:K6 (strain RIMD 2210633) GN=deoD2 PE=3 SV=1                              | 15.7     | 25.7     |          |          | 5.20E+06 | 1.00E+07 |          | 8.10E+06   |  |
| Q87G48                                  | Outer membrane lipoprotein OS=Vibrio parahaemolyticus serotype O3:K6 (strain RIMD 2210633) GN=VPA1469 PE=4 SV=1                                             | 16.7     | 8.7      |          |          | 2.20E+06 | 2.70E+06 | 3.40E+06 | 4.20E+06   |  |
| Q87G89                                  | Azurin OS=Vibrio parahaemolyticus serotype O3:K6 (strain RIMD 2210633) GN=VPA1428 PE=4 SV=1                                                                 | 24.0     | 15.8     | 1.80E+07 | 3.00E+07 | 2.20E+07 | 6.00E+07 | 3.20E+07 | 3.30E+07   |  |
| Q87GA0                                  | Putative glutathione S-transferase family protein OS=Vibrio parahaemolyticus serotype O3:K6 (strain RIMD 2210633) GN=VPA1417 PE=3 SV=1                      | 7.8      | 23.6     |          | 5.00E+06 | 5.90E+06 | 6.60E+06 | 6.60E+06 | 7.80E+06   |  |
| Q87GB6                                  | Maltose ABC transporter, periplasmic maltose-binding protein OS=Vibrio parahaemolyticus serotype O3:K6 (strain RIMD 2210633) GN=VPA1401 PE=4 SV=1           | 67.3     | 42.1     | 5.40E+07 | 6.50E+07 | 5.50E+07 | 8.60E+07 | 9.70E+07 | 6.90E+07   |  |
| Q87GC0                                  | Acyl-CoA thioester hydrolase-related protein OS=Vibrio parahaemolyticus serotype O3:K6 (strain RIMD 2210633) GN=VPA1393 PE=4 SV=1                           | 47.8     | 17.7     | 1.2      |          |          |          |          |            |  |



|        |                                                                                                                                                           |      |       |          |          |          |          |          |          |
|--------|-----------------------------------------------------------------------------------------------------------------------------------------------------------|------|-------|----------|----------|----------|----------|----------|----------|
| Q87101 | Aminomethyltransferase OS=Vibrio parahaemolyticus serotype O3:K6 (strain RIMD 2210633) GN=VPA0805 PE=3 SV=1                                               | 7.5  | 40.3  | 1.70E+06 | 3.20E+06 | 3.40E+06 | 4.50E+06 | 5.00E+06 | 3.70E+06 |
| Q87111 | Acetyl-coenzyme A carboxylase carboxyl transferase subunit beta 2 OS=Vibrio parahaemolyticus serotype O3:K6 (strain RIMD 2210633) GN=accD2 PE=3 SV=1      | 4.8  | 32.1  | 2.30E+06 | 3.60E+06 |          | 3.80E+06 | 5.00E+06 |          |
| Q87198 | Putative acetyltransferase OS=Vibrio parahaemolyticus serotype O3:K6 (strain RIMD 2210633) GN=VPA0708 PE=4 SV=1                                           | 5.5  | 20.9  |          |          | 3.00E+06 | 3.00E+06 | 5.50E+06 |          |
| Q871E9 | Iron(III) ABC transporter, periplasmic iron-compound-binding protein OS=Vibrio parahaemolyticus serotype O3:K6 (strain RIMD 2210633) GN=VPA0657 PE=4 SV=1 | 25.5 | 33.5  | 2.90E+06 | 1.10E+07 | 1.30E+07 | 1.40E+07 | 2.00E+07 | 1.60E+07 |
| Q871G4 | Putative glutathione S-transferase OS=Vibrio parahaemolyticus serotype O3:K6 (strain RIMD 2210633) GN=VPA0642 PE=4 SV=1                                   | 10.2 | 24.3  |          |          |          |          |          | 3.60E+06 |
| Q871G5 | Putative transcriptional regulator, LysR family OS=Vibrio parahaemolyticus serotype O3:K6 (strain RIMD 2210633) GN=VPA0641 PE=4 SV=1                      | 2.9  | 30.7  |          |          |          |          | 4.00E+06 |          |
| Q871G9 | Arginine ABC transporter, periplasmic arginine-binding protein OS=Vibrio parahaemolyticus serotype O3:K6 (strain RIMD 2210633) GN=VPA0637 PE=3 SV=1       | 15.0 | 27.3  | 2.10E+06 |          | 3.60E+06 | 8.60E+06 | 6.90E+06 | 5.00E+06 |
| Q871J5 | Acetate kinase 2 OS=Vibrio parahaemolyticus serotype O3:K6 (strain RIMD 2210633) GN=ackA2 PE=3 SV=1                                                       | 32.7 | 42.6  | 1.10E+07 | 1.60E+07 | 1.60E+07 | 1.30E+07 | 2.70E+07 | 2.00E+07 |
| Q871L1 | ATP-binding component of molybdate transport system OS=Vibrio parahaemolyticus serotype O3:K6 (strain RIMD 2210633) GN=VPA0595 PE=4 SV=1                  | 3.9  | 55.4  | 2.30E+06 | 2.40E+06 |          |          |          |          |
| Q871P0 | Alcohol dehydrogenase OS=Vibrio parahaemolyticus serotype O3:K6 (strain RIMD 2210633) GN=VPA0566 PE=4 SV=1                                                | 24.9 | 40.2  | 1.40E+07 | 1.70E+07 | 7.00E+06 | 8.50E+06 | 1.30E+07 | 9.50E+06 |
| Q871Q4 | Cold shock DNA-binding domain protein OS=Vibrio parahaemolyticus serotype O3:K6 (strain RIMD 2210633) GN=VPA0552 PE=4 SV=1                                | 36.2 | 7.5   | 5.20E+06 | 1.20E+07 | 1.10E+07 | 2.80E+07 | 1.90E+07 | 1.70E+07 |
| Q871S1 | Putative phosphomannomutase OS=Vibrio parahaemolyticus serotype O3:K6 (strain RIMD 2210633) GN=VPA0535 PE=3 SV=1                                          | 29.6 | 61.6  | 1.40E+07 | 1.70E+07 | 1.50E+07 | 2.20E+07 | 2.10E+07 | 1.70E+07 |
| Q871W3 | Uncharacterized protein OS=Vibrio parahaemolyticus serotype O3:K6 (strain RIMD 2210633) GN=VPA0493 PE=4 SV=1                                              | 3.8  | 29.0  |          |          |          |          | 2.00E+06 |          |
| Q871Y8 | Prolyl endopeptidase OS=Vibrio parahaemolyticus serotype O3:K6 (strain RIMD 2210633) GN=VPA0468 PE=4 SV=1                                                 | 2.7  | 84.2  |          | 4.10E+06 | 4.90E+06 |          | 9.70E+06 | 6.30E+06 |
| Q871Z0 | Universal stress protein OS=Vibrio parahaemolyticus serotype O3:K6 (strain RIMD 2210633) GN=VPA0466 PE=3 SV=1                                             | 8.5  | 16.3  |          | 2.90E+06 |          | 8.60E+06 |          |          |
| Q871Z4 | Uncharacterized protein OS=Vibrio parahaemolyticus serotype O3:K6 (strain RIMD 2210633) GN=VPA0429 PE=4 SV=1                                              | 6.8  | 20.2  |          |          | 8.20E+06 | 1.40E+07 | 1.90E+07 | 1.20E+07 |
| Q871Z5 | Uncharacterized protein OS=Vibrio parahaemolyticus serotype O3:K6 (strain RIMD 2210633) GN=VPA0428 PE=4 SV=1                                              | 6.4  | 19.1  |          |          |          |          | 7.70E+06 | 5.60E+06 |
| Q872J6 | Coproporphyrinogen oxidase homolog PhuW OS=Vibrio parahaemolyticus serotype O3:K6 (strain RIMD 2210633) GN=VPA0427 PE=4 SV=1                              | 7.9  | 50.4  |          | 3.10E+06 |          |          | 4.80E+06 |          |
| Q873J0 | Hemin ABC transporter, periplasmic hemin-binding protein HutB OS=Vibrio parahaemolyticus serotype O3:K6 (strain RIMD 2210633) GN=VPA0423 PE=4 SV=1        | 4.5  | 30.3  |          |          |          | 2.40E+06 |          |          |
| Q873J3 | LuxT OS=Vibrio parahaemolyticus serotype O3:K6 (strain RIMD 2210633) GN=VPA0420 PE=1 SV=1                                                                 | 15.0 | 17.5  |          |          |          | 2.20E+06 | 4.90E+06 |          |
| Q873J4 | Uncharacterized protein OS=Vibrio parahaemolyticus serotype O3:K6 (strain RIMD 2210633) GN=VPA0419 PE=1 SV=1                                              | 15.2 | 10.9  |          | 3.90E+06 |          | 6.00E+06 |          | 3.60E+06 |
| Q873J1 | NH(3)-dependent NAD(+) synthetase OS=Vibrio parahaemolyticus serotype O3:K6 (strain RIMD 2210633) GN=naeE PE=3 SV=1                                       | 6.2  | 30.2  |          |          | 1.90E+06 |          |          |          |
| Q873L1 | Phosphoenolpyruvate synthase OS=Vibrio parahaemolyticus serotype O3:K6 (strain RIMD 2210633) GN=VPA0372 PE=3 SV=1                                         | 51.1 | 88.1  | 6.40E+07 | 9.00E+07 | 6.40E+07 | 7.20E+07 | 8.30E+07 | 5.30E+07 |
| Q873J6 | Putrescine-binding periplasmic protein OS=Vibrio parahaemolyticus serotype O3:K6 (strain RIMD 2210633) GN=VPA0367 PE=3 SV=1                               | 20.6 | 38.7  | 5.70E+06 | 8.10E+06 | 7.90E+06 | 1.10E+07 | 1.00E+07 | 1.30E+07 |
| Q873J5 | Putative outer membrane protein OmpV OS=Vibrio parahaemolyticus serotype O3:K6 (strain RIMD 2210633) GN=VPA0318 PE=4 SV=1                                 | 4.7  | 28.1  |          | 4.60E+06 | 6.20E+06 | 3.40E+06 | 1.20E+07 | 7.50E+06 |
| Q873J1 | Uncharacterized protein OS=Vibrio parahaemolyticus serotype O3:K6 (strain RIMD 2210633) GN=VPA0302 PE=4 SV=1                                              | 7.0  | 14.7  |          |          |          |          | 2.30E+06 |          |
| Q873J3 | Uncharacterized protein OS=Vibrio parahaemolyticus serotype O3:K6 (strain RIMD 2210633) GN=VPA0246 PE=4 SV=1                                              | 3.0  | 45.6  |          |          |          |          |          | 1.70E+06 |
| Q873J8 | Phospho-beta-glucosidase B OS=Vibrio parahaemolyticus serotype O3:K6 (strain RIMD 2210633) GN=VPA0180 PE=3 SV=1                                           | 3.7  | 53.0  |          | 2.50E+06 | 1.50E+06 |          | 5.40E+06 | 2.40E+06 |
| Q873J8 | Biosynthetic arginine decarboxylase OS=Vibrio parahaemolyticus serotype O3:K6 (strain RIMD 2210633) GN=speA PE=3 SV=1                                     | 3.0  | 72.0  |          | 1.20E+06 | 1.90E+06 | 1.40E+06 |          |          |
| Q873J2 | Putative outer membrane protein OS=Vibrio parahaemolyticus serotype O3:K6 (strain RIMD 2210633) GN=VPA0166 PE=4 SV=1                                      | 11.5 | 38.0  | 1.10E+07 | 1.20E+07 | 1.50E+07 | 1.20E+07 | 2.00E+07 | 1.50E+07 |
| Q873V9 | Putative PmbA-related protein OS=Vibrio parahaemolyticus serotype O3:K6 (strain RIMD 2210633) GN=VPA0139 PE=4 SV=1                                        | 2.9  | 47.7  |          |          |          |          | 2.30E+06 | 2.30E+06 |
| Q873J5 | Putative ABC transporter substrate-binding protein OS=Vibrio parahaemolyticus serotype O3:K6 (strain RIMD 2210633) GN=VPA0133 PE=4 SV=1                   | 4.4  | 34.7  |          | 2.60E+06 |          |          |          |          |
| Q873J7 | Hydroxyethylthiazole kinase OS=Vibrio parahaemolyticus serotype O3:K6 (strain RIMD 2210633) GN=thiM PE=3 SV=1                                             | 7.6  | 27.7  |          |          |          | 2.10E+06 |          | 3.00E+06 |
| Q873J1 | Putative transcriptional regulator OS=Vibrio parahaemolyticus serotype O3:K6 (strain RIMD 2210633) GN=VPA1007 PE=4 SV=1                                   | 3.8  | 35.6  |          |          |          |          |          |          |
| Q873K0 | Outer membrane protein OmpW OS=Vibrio parahaemolyticus serotype O3:K6 (strain RIMD 2210633) GN=VPA0096 PE=4 SV=1                                          | 6.5  | 23.5  | 7.20E+06 | 3.40E+06 | 4.60E+06 |          |          | 5.10E+06 |
| Q873K3 | Chitinase OS=Vibrio parahaemolyticus serotype O3:K6 (strain RIMD 2210633) GN=VPA0055 PE=3 SV=1                                                            | 3.1  | 90.0  | 3.50E+06 |          |          |          |          |          |
| Q873K0 | Glucosamine-6-phosphatase OS=Vibrio parahaemolyticus serotype O3:K6 (strain RIMD 2210633) GN=ngbB PE=3 SV=1                                               | 23.7 | 29.6  |          | 8.60E+06 |          | 1.40E+07 | 6.70E+06 | 1.10E+07 |
| Q873K4 | ATP synthase subunit b OS=Vibrio parahaemolyticus serotype O3:K6 (strain RIMD 2210633) GN=atpF PE=3 SV=1                                                  | 9.0  | 17.5  |          | 2.00E+06 |          | 1.30E+06 |          | 2.70E+06 |
| Q873K5 | ATP synthase subunit delta OS=Vibrio parahaemolyticus serotype O3:K6 (strain RIMD 2210633) GN=atpH PE=3 SV=1                                              | 8.5  | 19.4  |          |          |          |          | 5.50E+06 |          |
| Q873K6 | ATP synthase subunit alpha OS=Vibrio parahaemolyticus serotype O3:K6 (strain RIMD 2210633) GN=atpA PE=3 SV=1                                              | 61.4 | 56.6  | 5.20E+07 | 7.20E+07 | 6.70E+07 | 7.00E+07 | 9.60E+07 | 7.10E+07 |
| Q873K7 | ATP synthase gamma chain OS=Vibrio parahaemolyticus serotype O3:K6 (strain RIMD 2210633) GN=atpG PE=3 SV=1                                                | 22.9 | 31.8  | 8.20E+06 | 1.00E+07 | 1.10E+07 | 1.20E+07 | 1.60E+07 | 1.00E+07 |
| Q873K8 | ATP synthase subunit beta OS=Vibrio parahaemolyticus serotype O3:K6 (strain RIMD 2210633) GN=atpD PE=3 SV=1                                               | 56.5 | 50.7  | 4.20E+07 | 5.90E+07 | 5.10E+07 | 5.80E+07 | 8.50E+07 | 6.20E+07 |
| Q873K8 | L-threonine dehydratase OS=Vibrio parahaemolyticus serotype O3:K6 (strain RIMD 2210633) GN=tdcA PE=3 SV=1                                                 | 5.4  | 56.6  | 4.20E+06 | 5.10E+06 | 5.00E+06 | 7.10E+06 | 7.40E+06 | 8.00E+06 |
| Q873K6 | Dihydroxy-acid dehydratase OS=Vibrio parahaemolyticus serotype O3:K6 (strain RIMD 2210633) GN=hdv PE=3 SV=1                                               | 38.5 | 65.6  | 1.40E+07 | 1.90E+07 | 1.60E+07 | 2.20E+07 | 2.30E+07 | 1.90E+07 |
| Q873K7 | Branched-chain amino acid aminotransferase OS=Vibrio parahaemolyticus serotype O3:K6 (strain RIMD 2210633) GN=VP3060 PE=3 SV=1                            | 13.8 | 34.3  | 1.10E+07 | 1.00E+07 | 1.30E+07 | 2.00E+07 | 2.20E+07 | 2.00E+07 |
| Q873K3 | Thiol-disulfide interchange protein OS=Vibrio parahaemolyticus serotype O3:K6 (strain RIMD 2210633) GN=VP3054 PE=3 SV=1                                   | 4.5  | 22.8  |          | 2.60E+06 | 3.00E+06 | 4.50E+06 |          | 4.90E+06 |
| Q873K0 | Phosphomethylpyrimidine synthase OS=Vibrio parahaemolyticus serotype O3:K6 (strain RIMD 2210633) GN=thiC PE=3 SV=1                                        | 2.0  | 72.4  |          | 1.90E+06 |          |          |          |          |
| Q873K6 | Aminopeptidase P OS=Vibrio parahaemolyticus serotype O3:K6 (strain RIMD 2210633) GN=VP3021 PE=4 SV=1                                                      | 9.9  | 65.5  | 3.20E+06 | 7.10E+06 | 5.00E+06 | 6.40E+06 | 6.30E+06 | 5.70E+06 |
| Q873K7 | Transcription termination factor Rho OS=Vibrio parahaemolyticus serotype O3:K6 (strain RIMD 2210633) GN=rho PE=3 SV=1                                     | 2.6  | 46.8  |          |          |          | 2.10E+06 |          |          |
| Q873J3 | Diaminopimelate decarboxylase OS=Vibrio parahaemolyticus serotype O3:K6 (strain RIMD 2210633) GN=lysA PE=3 SV=1                                           | 24.7 | 45.9  | 3.60E+06 | 4.50E+06 | 4.50E+06 | 4.60E+06 | 6.40E+06 | 7.10E+06 |
| Q873K9 | Transcription termination/antitermination protein NusG OS=Vibrio parahaemolyticus serotype O3:K6 (strain RIMD 2210633) GN=nusG PE=3 SV=2                  | 5.5  | 20.7  |          |          | 5.80E+06 | 7.30E+06 | 9.80E+06 |          |
| Q873K0 | 50S ribosomal protein L11 OS=Vibrio parahaemolyticus serotype O3:K6 (strain RIMD 2210633) GN=rplK PE=3 SV=1                                               | 40.8 | 14.7  | 2.50E+06 | 5.30E+06 | 6.90E+06 | 2.30E+07 | 1.60E+07 | 1.20E+07 |
| Q873K1 | 50S ribosomal protein L1 OS=Vibrio parahaemolyticus serotype O3:K6 (strain RIMD 2210633) GN=rplA PE=3 SV=1                                                | 43.8 | 24.7  | 1.50E+07 | 2.10E+07 | 2.50E+07 | 3.90E+07 | 4.30E+07 | 3.50E+07 |
| Q873K3 | 50S ribosomal protein L7/L12 OS=Vibrio parahaemolyticus serotype O3:K6 (strain RIMD 2210633) GN=rplL PE=3 SV=1                                            | 29.5 | 12.2  | 9.40E+06 | 1.80E+07 | 1.40E+07 | 4.70E+07 | 3.90E+07 | 2.90E+07 |
| Q873K4 | DNA-directed RNA polymerase subunit beta OS=Vibrio parahaemolyticus serotype O3:K6 (strain RIMD 2210633) GN=rpoB PE=3 SV=1                                | 38.1 | 149.5 | 1.20E+07 | 1.40E+07 | 1.60E+07 | 1.50E+07 | 2.00E+07 | 1.40E+07 |
| Q873K5 | DNA-directed RNA polymerase subunit beta' OS=Vibrio parahaemolyticus serotype O3:K6 (strain RIMD 2210633) GN=rpoC PE=3 SV=1                               | 30.7 | 154.8 | 1.10E+07 | 1.40E+07 | 1.40E+07 | 1.60E+07 | 2.70E+07 | 1.50E+07 |
| Q873K6 | Regulator of sigma D OS=Vibrio parahaemolyticus serotype O3:K6 (strain RIMD 2210633) GN=VP2920 PE=3 SV=1                                                  | 9.8  | 18.6  |          | 4.40E+06 |          |          | 1.00E+07 | 7.30E+06 |
| Q873K5 | DNA-binding protein HU-2 OS=Vibrio parahaemolyticus serotype O3:K6 (strain RIMD 2210633) GN=VP2911 PE=3 SV=1                                              | 63.7 | 9.6   | 2.90E+07 | 2.90E+07 | 3.50E+07 | 6.80E+07 | 6.50E+07 | 5.80E+07 |
| Q873K0 | Bifunctional purine biosynthesis protein PurH OS=Vibrio parahaemolyticus serotype O3:K6 (strain RIMD 2210633) GN=purH PE=3 SV=1                           | 20.9 | 57.3  | 4.40E+06 | 6.70E+06 | 5.70E+06 | 8.60E+06 | 1.40E+07 | 7.40E+06 |
| Q873K4 | Acetyl-CoA carboxylase, biotin carboxylase OS=Vibrio parahaemolyticus serotype O3:K6 (strain RIMD 2210633) GN=VP2881 PE=4 SV=1                            | 30.0 | 49.2  | 7.60E+06 | 1.00E+07 | 1.90E+07 | 1.00E+07 | 1.40E+07 | 1.20E+07 |
| Q873K7 | Acetyl-coenzyme A synthetase OS=Vibrio parahaemolyticus serotype O3:K6 (strain RIMD 2210633) GN=acsA PE=3 SV=1                                            | 28.0 | 71.7  | 1.80E+07 | 2.30E+07 | 2.10E+07 | 1.30E+07 | 1.60E+07 | 2.00E+07 |
| Q873K2 | Fumarate hydratase class II OS=Vibrio parahaemolyticus serotype O3:K6 (strain RIMD 2210633) GN=fumC PE=3 SV=1                                             | 32.8 | 48.7  | 4.20E+07 | 5.90E+07 | 6.20E+07 | 6.30E+07 | 8.40E+07 | 6.60E+07 |
| Q873K2 | Aspartate ammonia-lyase OS=Vibrio parahaemolyticus serotype O3:K6 (strain RIMD 2210633) GN=VP2863 PE=3 SV=1                                               | 3.9  | 52.7  | 1.70E+06 | 3.80E+06 | 3.30E+06 | 3.90E+06 | 4.10E+06 |          |
| Q873K5 | Superoxide dismutase OS=Vibrio parahaemolyticus serotype O3:K6 (strain RIMD 2210633) GN=VP2860 PE=3 SV=1                                                  | 34.2 | 23.0  | 1.40E+07 | 1.90E+07 | 2.20E+07 | 2.70E+07 | 4.60E+07 | 2.80E+07 |
| Q873K0 | ATP-dependent 6-phosphofructokinase OS=Vibrio parahaemolyticus serotype O3:K6 (strain RIMD 2210633) GN=pfrA PE=3 SV=1                                     | 17.2 | 34.6  | 8.20E+06 | 1.10E+07 | 1.10E+07 | 9.30E+06 | 1.70E+07 | 9.10E+06 |
| Q873K9 | Elongation factor P OS=Vibrio parahaemolyticus serotype O3:K6 (strain RIMD 2210633) GN=efp PE=3 SV=1                                                      | 6.4  | 20.6  |          |          |          | 1.40E+07 | 1.70E+07 | 1.20E+07 |
| Q873K2 | Protein-export protein SecB OS=Vibrio parahaemolyticus serotype O3:K6 (strain RIMD 2210633) GN=secB PE=3 SV=1                                             | 23.4 | 17.2  |          | 3.50E+06 |          | 5.70E+06 | 1.20E+07 | 9.60E+06 |
| Q873K5 | 2,3-bisphosphoglycerate-independent phosphoglycerate mutase OS=Vibrio parahaemolyticus serotype O3:K6 (strain RIMD 2210633) GN=pgm1 PE=3 SV=1             | 24.5 | 55.1  | 7.40E+06 | 1.10E+07 | 1.30E+07 | 1.50E+07 | 1.90E+07 | 1.60E+07 |
| Q873L0 | RNA-binding protein Hfq OS=Vibrio parahaemolyticus serotype O3:K6 (strain RIMD 2210633) GN=hfq PE=3 SV=1                                                  | 25.3 | 9.8   | 6.00E+06 | 8.10E+06 | 9.60E+06 | 1.60E+07 | 1.60E+07 | 1.50E+07 |
| Q873L1 | Tryptophan-tRNA ligase OS=Vibrio parahaemolyticus serotype O3:K6 (strain RIMD 2210633) GN=trpS PE=3 SV=1                                                  | 3.8  | 37.6  |          |          | 1.90E+06 | 2.40E+06 | 2.70E+06 | 2.60E+06 |
| Q873L0 | Acetylornithine aminotransferase OS=Vibrio parahaemolyticus serotype O3:K6 (strain RIMD 2210633) GN=argD PE=3 SV=1                                        | 26.8 | 43.3  | 6.30E+06 | 1.20E+07 | 8.40E+06 | 1.10E+07 | 1.00E+07 | 9.70E+06 |
| Q873L2 | N-succinylglutamate 5-semialdehyde dehydrogenase OS=Vibrio parahaemolyticus serotype O3:K6 (strain RIMD 2210633) GN=astD PE=3 SV=1                        | 3.9  | 52.0  |          | 4.00E+06 | 2.00E+06 | 3.40E+06 |          |          |
| Q873L3 | Uncharacterized protein OS=Vibrio parahaemolyticus serotype O3:K6 (strain RIMD 2210633) GN=VP2794 PE=4 SV=1                                               | 32.7 | 29.2  | 2.60E+06 | 9.60E+06 | 6.00E+06 | 2.10E+07 | 1.20E+07 | 1.20E+07 |
| Q873L3 | Peptidyl-prolyl cis-trans isomerase OS=Vibrio parahaemolyticus serotype O3:K6 (strain RIMD 2210633) GN=VP2783 PE=4 SV=1                                   | 19.7 | 20.4  |          |          |          | 1.30E+07 | 1.30E+07 | 8.60E+06 |
| Q873L4 | 30S ribosomal protein S7 OS=Vibrio parahaemolyticus serotype O3:K6 (strain RIMD 2210633) GN=rpsG PE=3 SV=1                                                | 44.9 | 17.7  | 9.60E+06 | 4.40E+06 | 1.40E+07 | 1.60E+07 | 1.30E+07 | 1        |

Table S1

|        |                                                                                                                                                           |      |       |          |          |          |          |          |          |          |          |
|--------|-----------------------------------------------------------------------------------------------------------------------------------------------------------|------|-------|----------|----------|----------|----------|----------|----------|----------|----------|
| Q87LH7 | PTS system, cellobiose-specific IIA component OS=Vibrio parahaemolyticus serotype O3K6 (strain RIMD 2210633) GN=VP2635 PE=4 SV=1                          | 31.1 | 11.6  |          |          |          |          |          | 1.30E+06 | 2.10E+07 | 1.00E+07 |
| Q87LH8 | 6-phospho-beta-glucosidase OS=Vibrio parahaemolyticus serotype O3K6 (strain RIMD 2210633) GN=VP2634 PE=3 SV=1                                             | 55.7 | 48.3  |          |          |          |          |          | 6.70E+06 | 7.80E+07 | 3.40E+07 |
| Q87LH9 | Carbohydrate desactylase OS=Vibrio parahaemolyticus serotype O3K6 (strain RIMD 2210633) GN=VP2633 PE=3 SV=1                                               | 5.2  | 28.0  |          |          |          |          |          |          | 1.10E+07 |          |
| Q87L11 | Glutathione synthetase OS=Vibrio parahaemolyticus serotype O3K6 (strain RIMD 2210633) GN=gsbH PE=3 SV=1                                                   | 8.2  | 35.2  | 3.20E+06 | 3.50E+06 | 4.40E+06 |          | 7.30E+06 |          | 9.10E+06 | 7.40E+06 |
| Q87LK2 | Ribosomal RNA small subunit methyltransferase E OS=Vibrio parahaemolyticus serotype O3K6 (strain RIMD 2210633) GN=VP2610 PE=3 SV=1                        | 4.9  | 27.2  |          |          |          |          |          |          |          | 1.70E+06 |
| Q87LK3 | S-adenosylmethionine synthase OS=Vibrio parahaemolyticus serotype O3K6 (strain RIMD 2210633) GN=metK PE=3 SV=1                                            | 11.7 | 42.0  | 5.20E+06 | 6.00E+06 | 7.50E+06 |          | 6.50E+06 |          | 8.50E+06 | 7.40E+06 |
| Q87LK8 | Transketolase I OS=Vibrio parahaemolyticus serotype O3K6 (strain RIMD 2210633) GN=tkl1 PE=3 SV=1                                                          | 23.9 | 72.0  | 1.20E+07 | 1.50E+07 | 1.50E+07 |          | 1.50E+07 |          | 1.60E+07 | 1.60E+07 |
| Q87LL1 | Phosphoglycerate kinase OS=Vibrio parahaemolyticus serotype O3K6 (strain RIMD 2210633) GN=pgk PE=3 SV=1                                                   | 43.8 | 40.7  | 1.50E+07 | 2.40E+07 | 3.10E+07 |          | 3.90E+07 |          | 5.40E+07 | 4.20E+07 |
| Q87LL2 | Fructose-bisphosphate aldolase, class II OS=Vibrio parahaemolyticus serotype O3K6 (strain RIMD 2210633) GN=VP2599 PE=4 SV=1                               | 67.0 | 38.9  | 4.70E+07 | 6.80E+07 | 7.50E+07 |          | 7.80E+07 |          | 1.10E+08 | 9.40E+07 |
| Q87LL8 | D-3-phosphoglycerate dehydrogenase OS=Vibrio parahaemolyticus serotype O3K6 (strain RIMD 2210633) GN=VP2583 PE=3 SV=1                                     | 42.4 | 44.7  | 1.50E+07 | 2.10E+07 | 1.80E+07 |          | 2.30E+07 |          | 3.00E+07 | 2.10E+07 |
| Q87LM8 | tRNA-modifying protein YgZ OS=Vibrio parahaemolyticus serotype O3K6 (strain RIMD 2210633) GN=VP2583 PE=3 SV=1                                             | 3.4  | 35.5  |          |          | 2.80E+06 | 2.20E+06 | 3.30E+06 |          |          | 3.70E+06 |
| Q87LN1 | L-asparatase oxidase OS=Vibrio parahaemolyticus serotype O3K6 (strain RIMD 2210633) GN=VP2580 PE=3 SV=1                                                   | 8.7  | 60.9  | 4.70E+06 | 3.10E+06 |          | 2.00E+06 | 3.90E+06 |          | 5.10E+06 |          |
| Q87LN5 | Sigma-E factor regulatory protein RseB OS=Vibrio parahaemolyticus serotype O3K6 (strain RIMD 2210633) GN=VP2576 PE=4 SV=1                                 | 2.8  | 36.0  |          |          |          |          | 1.30E+06 |          |          |          |
| Q87LP2 | Pyridoxine 5'-phosphate synthase OS=Vibrio parahaemolyticus serotype O3K6 (strain RIMD 2210633) GN=pxsA PE=3 SV=1                                         | 6.2  | 26.7  |          | 3.10E+07 |          |          |          |          | 3.30E+06 |          |
| Q87LP9 | CTP synthase OS=Vibrio parahaemolyticus serotype O3K6 (strain RIMD 2210633) GN=pyrG PE=3 SV=1                                                             | 10.8 | 60.1  | 3.60E+06 | 5.50E+06 | 2.80E+06 | 5.70E+06 | 7.60E+06 |          | 6.50E+06 | 6.50E+06 |
| Q87LQ0 | Enolase OS=Vibrio parahaemolyticus serotype O3K6 (strain RIMD 2210633) GN=eno PE=3 SV=1                                                                   | 54.5 | 45.5  | 2.80E+07 | 3.80E+07 | 4.10E+07 |          | 6.60E+07 |          | 8.70E+07 | 7.10E+07 |
| Q87LQ8 | RNA polymerase sigma factor RpoS OS=Vibrio parahaemolyticus serotype O3K6 (strain RIMD 2210633) GN=rpoS PE=3 SV=1                                         | 24.8 | 36.5  | 1.30E+06 | 3.60E+06 | 3.60E+06 | 6.20E+06 | 7.70E+06 |          | 1.20E+07 |          |
| Q87LR1 | Protein RecA OS=Vibrio parahaemolyticus serotype O3K6 (strain RIMD 2210633) GN=recA PE=3 SV=1                                                             | 34.9 | 37.4  | 9.30E+06 | 5.70E+06 | 1.30E+07 | 1.30E+07 | 1.70E+07 |          | 1.70E+07 | 1.30E+07 |
| Q87LR3 | Alanine-tRNA ligase OS=Vibrio parahaemolyticus serotype O3K6 (strain RIMD 2210633) GN=alaS PE=3 SV=1                                                      | 6.2  | 93.9  |          | 4.10E+06 | 3.60E+06 | 4.30E+06 | 4.00E+06 |          | 4.40E+06 | 4.40E+06 |
| Q87LR5 | Carbon storage regulator homolog OS=Vibrio parahaemolyticus serotype O3K6 (strain RIMD 2210633) GN=csrA PE=3 SV=1                                         | 18.5 | 7.1   | 3.00E+06 |          | 4.00E+06 | 9.30E+06 | 8.90E+06 |          | 1.40E+07 |          |
| Q87LS4 | S-ribosylhomocysteine lyase OS=Vibrio parahaemolyticus serotype O3K6 (strain RIMD 2210633) GN=luxS PE=3 SV=1                                              | 12.2 | 19.0  |          |          |          | 4.70E+06 | 4.30E+06 |          | 3.30E+06 |          |
| Q87LT1 | 50S ribosomal protein L19 OS=Vibrio parahaemolyticus serotype O3K6 (strain RIMD 2210633) GN=rplP PE=3 SV=1                                                | 40.2 | 13.2  | 3.70E+06 | 4.40E+06 | 1.80E+07 | 2.00E+07 | 1.60E+07 |          | 1.10E+07 |          |
| Q87LU2 | Pyruvate dehydrogenase E1 component OS=Vibrio parahaemolyticus serotype O3K6 (strain RIMD 2210633) GN=VP2519 PE=4 SV=1                                    | 36.4 | 99.6  | 4.60E+07 | 3.60E+07 | 4.20E+07 | 3.30E+07 | 4.40E+07 |          | 3.50E+07 |          |
| Q87LU3 | Acetyltransferase component of pyruvate dehydrogenase complex OS=Vibrio parahaemolyticus serotype O3K6 (strain RIMD 2210633) GN=VP2518 PE=3 SV=1          | 26.3 | 64.9  | 1.30E+07 | 1.40E+07 | 2.10E+07 | 1.70E+07 | 2.10E+07 |          | 1.80E+07 |          |
| Q87LW2 | Uncharacterized protein OS=Vibrio parahaemolyticus serotype O3K6 (strain RIMD 2210633) GN=VP2496 PE=4 SV=1                                                | 1.7  | 86.2  |          |          |          |          |          |          |          |          |
| Q87LW3 | Aconitate hydratase B OS=Vibrio parahaemolyticus serotype O3K6 (strain RIMD 2210633) GN=VP2495 PE=3 SV=1                                                  | 29.0 | 94.0  | 2.50E+07 | 1.90E+07 | 1.70E+07 | 1.30E+07 | 2.00E+07 |          | 1.20E+07 |          |
| Q87LW7 | Iron(III) ABC transporter, periplasmic iron-compound-binding protein OS=Vibrio parahaemolyticus serotype O3K6 (strain RIMD 2210633) GN=VP2491 PE=4 SV=1   | 40.1 | 37.7  | 2.70E+07 | 3.80E+07 | 2.90E+07 | 4.90E+07 | 5.20E+07 |          | 4.40E+07 |          |
| Q87LX0 | Putative phosphoglucomutase/phosphomannomutase OS=Vibrio parahaemolyticus serotype O3K6 (strain RIMD 2210633) GN=VP2488 PE=4 SV=1                         | 5.3  | 52.3  |          |          |          |          |          |          |          | 4.90E+06 |
| Q87LX1 | N,N'-diacetylchitobiose phosphorylase OS=Vibrio parahaemolyticus serotype O3K6 (strain RIMD 2210633) GN=VP2487 PE=4 SV=1                                  | 20.0 | 90.0  |          |          |          |          | 3.70E+06 |          | 8.10E+06 | 1.70E+07 |
| Q87LX9 | Peptide ABC transporter, periplasmic peptide-binding protein OS=Vibrio parahaemolyticus serotype O3K6 (strain RIMD 2210633) GN=VP2479 PE=4 SV=1           | 21.3 | 62.9  |          |          |          |          | 3.80E+06 |          | 2.40E+07 | 4.60E+07 |
| Q87LZ1 | Outer membrane protein U OS=Vibrio parahaemolyticus serotype O3K6 (strain RIMD 2210633) GN=ompU PE=3 SV=1                                                 | 19.3 | 36.3  | 3.00E+06 | 5.50E+06 | 8.70E+06 | 9.20E+06 | 1.20E+07 |          | 9.10E+06 |          |
| Q87LZ2 | Transcription elongation factor GreA OS=Vibrio parahaemolyticus serotype O3K6 (strain RIMD 2210633) GN=greA PE=3 SV=1                                     | 7.0  | 17.5  |          |          |          |          | 3.00E+06 |          |          |          |
| Q87LZ5 | ATP-dependent zinc metalloprotease FtsH OS=Vibrio parahaemolyticus serotype O3K6 (strain RIMD 2210633) GN=ftsH PE=3 SV=1                                  | 2.7  | 72.9  |          |          | 3.10E+06 |          |          |          |          |          |
| Q87M01 | Transcription termination/antitermination protein NusA OS=Vibrio parahaemolyticus serotype O3K6 (strain RIMD 2210633) GN=nusA PE=3 SV=1                   | 14.3 | 54.9  | 6.00E+06 | 9.00E+06 | 8.40E+06 | 6.50E+06 | 6.50E+06 |          | 7.20E+06 |          |
| Q87M02 | Translation initiation factor IF-2 OS=Vibrio parahaemolyticus serotype O3K6 (strain RIMD 2210633) GN=infB PE=3 SV=1                                       | 10.5 | 99.3  | 3.50E+06 | 6.10E+06 | 5.40E+06 | 7.20E+06 | 9.00E+06 |          | 7.00E+06 |          |
| Q87M05 | 30S ribosomal protein S15 OS=Vibrio parahaemolyticus serotype O3K6 (strain RIMD 2210633) GN=rpsO PE=3 SV=1                                                | 6.7  | 10.1  | 9.20E+06 | 8.80E+06 | 1.30E+07 | 1.40E+07 |          |          |          |          |
| Q87M06 | Polyribonucleotide nucleotidyltransferase OS=Vibrio parahaemolyticus serotype O3K6 (strain RIMD 2210633) GN=pnp PE=3 SV=1                                 | 35.9 | 76.7  | 6.10E+06 | 1.80E+07 | 1.30E+07 | 1.10E+07 | 1.40E+07 |          | 1.20E+07 |          |
| Q87M22 | Deoxyribose-phosphate aldolase OS=Vibrio parahaemolyticus serotype O3K6 (strain RIMD 2210633) GN=deoC PE=3 SV=1                                           | 4.3  | 27.7  | 3.40E+06 | 5.80E+06 | 3.20E+06 | 9.50E+06 | 6.80E+06 |          | 5.70E+06 |          |
| Q87M25 | Purine nucleoside phosphorylase DeoD-type I OS=Vibrio parahaemolyticus serotype O3K6 (strain RIMD 2210633) GN=deoD1 PE=3 SV=1                             | 10.0 | 25.9  |          | 3.70E+06 |          | 6.70E+06 | 9.00E+06 |          | 5.80E+06 |          |
| Q87M27 | Phosphoserine phosphatase OS=Vibrio parahaemolyticus serotype O3K6 (strain RIMD 2210633) GN=VP2431 PE=4 SV=1                                              | 4.6  | 35.8  |          |          | 2.20E+06 |          |          |          |          |          |
| Q87M30 | Elongation factor G 2 OS=Vibrio parahaemolyticus serotype O3K6 (strain RIMD 2210633) GN=eufA2 PE=3 SV=1                                                   | 48.3 | 76.3  | 3.50E+07 | 5.40E+07 | 5.50E+07 | 6.30E+07 | 7.80E+07 |          | 6.10E+07 |          |
| Q87M55 | Beta-galactosidase OS=Vibrio parahaemolyticus serotype O3K6 (strain RIMD 2210633) GN=VP2403 PE=3 SV=1                                                     | 1.6  | 118.9 |          | 3.20E+06 |          |          |          |          |          |          |
| Q87M78 | 2,3,4,5-tetrahydrodipyrime-2,6-dicarboxylate N-succinyltransferase OS=Vibrio parahaemolyticus serotype O3K6 (strain RIMD 2210633) GN=dapD PE=3 SV=1       | 21.0 | 35.6  | 3.50E+06 | 1.10E+07 | 7.70E+06 | 1.10E+07 | 1.80E+07 |          | 1.50E+07 |          |
| Q87MC3 | Proline-tRNA ligase OS=Vibrio parahaemolyticus serotype O3K6 (strain RIMD 2210633) GN=proS PE=3 SV=1                                                      | 16.5 | 63.2  | 3.20E+06 | 4.70E+06 | 4.50E+06 | 5.90E+06 | 6.50E+06 |          | 4.10E+06 |          |
| Q87MD8 | 30S ribosomal protein S2 OS=Vibrio parahaemolyticus serotype O3K6 (strain RIMD 2210633) GN=rpsB PE=3 SV=1                                                 | 7.0  | 26.8  |          |          |          | 6.20E+06 |          |          |          |          |
| Q87MD9 | Elongation factor Ts OS=Vibrio parahaemolyticus serotype O3K6 (strain RIMD 2210633) GN=tsf PE=3 SV=1                                                      | 66.5 | 29.8  | 3.30E+07 | 4.50E+07 | 4.80E+07 | 5.60E+07 | 7.50E+07 |          | 6.50E+07 |          |
| Q87ME6 | Chaperone protein skp OS=Vibrio parahaemolyticus serotype O3K6 (strain RIMD 2210633) GN=VP2309 PE=3 SV=1                                                  | 21.1 | 18.5  | 3.30E+06 | 3.50E+06 | 6.10E+06 | 6.40E+06 | 6.00E+06 |          | 5.30E+06 |          |
| Q87ME8 | 3-hydroxyacyl-[acyl-carrier-protein] dehydratase FabZ OS=Vibrio parahaemolyticus serotype O3K6 (strain RIMD 2210633) GN=fabZ PE=3 SV=1                    | 8.0  | 16.8  |          |          | 2.70E+06 | 2.60E+06 | 2.80E+06 |          | 2.80E+06 |          |
| Q87MG7 | Phosphopentose isomerase OS=Vibrio parahaemolyticus serotype O3K6 (strain RIMD 2210633) GN=gmhA PE=3 SV=1                                                 | 11.5 | 20.8  |          | 1.20E+06 | 3.30E+06 | 4.30E+06 | 4.30E+06 |          |          |          |
| Q87MH0 | Phosphoribosylformylglycinamide cyclo-ligase OS=Vibrio parahaemolyticus serotype O3K6 (strain RIMD 2210633) GN=purM PE=3 SV=1                             | 5.5  | 36.8  |          |          |          |          | 4.70E+06 |          |          |          |
| Q87M12 | 4-hydroxy-tetrahydrodipicolinate synthase OS=Vibrio parahaemolyticus serotype O3K6 (strain RIMD 2210633) GN=dapA PE=3 SV=1                                | 40.4 | 31.2  | 9.60E+06 | 1.50E+07 | 1.40E+07 | 1.80E+07 | 2.80E+07 |          | 2.10E+07 |          |
| Q87M16 | Succinyl-diaminopimelate desuccinylase OS=Vibrio parahaemolyticus serotype O3K6 (strain RIMD 2210633) GN=dapE PE=3 SV=1                                   | 3.4  | 41.0  |          |          |          |          |          |          |          | 2.80E+06 |
| Q87MM8 | 50S ribosomal protein L3 glutamine methyltransferase OS=Vibrio parahaemolyticus serotype O3K6 (strain RIMD 2210633) GN=rpmB PE=3 SV=1                     | 3.5  | 35.2  |          |          |          |          |          |          |          |          |
| Q87MM9 | Chorismate synthase OS=Vibrio parahaemolyticus serotype O3K6 (strain RIMD 2210633) GN=aroC PE=3 SV=1                                                      | 7.5  | 39.0  |          |          | 2.70E+06 | 2.70E+06 | 4.80E+06 |          | 4.80E+06 |          |
| Q87MN7 | 3-oxoacyl-[acyl-carrier-protein] synthase I OS=Vibrio parahaemolyticus serotype O3K6 (strain RIMD 2210633) GN=VP2194 PE=3 SV=1                            | 19.6 | 42.6  | 6.00E+06 | 3.10E+07 | 5.50E+06 | 8.30E+06 | 1.10E+07 |          | 9.00E+06 |          |
| Q87MN9 | Aspartate-semialdehyde dehydrogenase OS=Vibrio parahaemolyticus serotype O3K6 (strain RIMD 2210633) GN=asd PE=3 SV=1                                      | 4.5  | 37.2  |          |          |          |          | 4.70E+06 |          |          |          |
| Q87MP2 | Acetyl-coenzyme A carboxylase carboxyl transferase subunit beta 1 OS=Vibrio parahaemolyticus serotype O3K6 (strain RIMD 2210633) GN=accD1 PE=3 SV=1       | 7.5  | 34.0  | 2.50E+06 | 3.60E+06 |          | 4.10E+06 | 5.90E+06 |          | 5.00E+06 |          |
| Q87MP6 | Amidophosphoribosyltransferase OS=Vibrio parahaemolyticus serotype O3K6 (strain RIMD 2210633) GN=purF PE=3 SV=1                                           | 6.9  | 56.0  | 2.30E+06 |          |          | 2.50E+06 | 2.40E+06 |          |          |          |
| Q87MR4 | Uncharacterized protein OS=Vibrio parahaemolyticus serotype O3K6 (strain RIMD 2210633) GN=VP2167 PE=4 SV=1                                                | 11.7 | 11.1  |          |          |          |          | 3.50E+06 |          |          |          |
| Q87MS4 | Glyceraldehyde-3-phosphate dehydrogenase OS=Vibrio parahaemolyticus serotype O3K6 (strain RIMD 2210633) GN=VP2157 PE=3 SV=1                               | 58.6 | 35.2  | 6.20E+07 | 8.40E+07 | 1.00E+08 | 1.20E+08 | 1.60E+08 |          | 1.20E+08 |          |
| Q87MV7 | Aspartate-semialdehyde dehydrogenase OS=Vibrio parahaemolyticus serotype O3K6 (strain RIMD 2210633) GN=asd PE=3 SV=1                                      | 56.1 | 40.2  | 2.10E+07 | 3.00E+07 | 2.70E+07 | 3.10E+07 | 3.70E+07 |          | 3.40E+07 |          |
| Q87MW0 | Aldehyde-alcohol dehydrogenase OS=Vibrio parahaemolyticus serotype O3K6 (strain RIMD 2210633) GN=VP2121 PE=1 SV=1                                         | 26.3 | 97.1  | 1.40E+07 | 1.90E+07 | 1.90E+07 | 1.90E+07 | 2.70E+07 |          | 2.20E+07 |          |
| Q87MW3 | Superoxide dismutase OS=Vibrio parahaemolyticus serotype O3K6 (strain RIMD 2210633) GN=VP2118 PE=3 SV=1                                                   | 6.5  | 22.2  |          |          |          |          | 3.30E+06 |          |          |          |
| Q87MY5 | Oligopeptide ABC transporter, periplasmic oligopeptide-binding protein OS=Vibrio parahaemolyticus serotype O3K6 (strain RIMD 2210633) GN=VP2091 PE=4 SV=1 | 2.5  | 62.3  |          |          |          |          | 4.70E+06 |          |          |          |
| Q87MZ3 | Phosphate acetyltransferase OS=Vibrio parahaemolyticus serotype O3K6 (strain RIMD 2210633) GN=VP2083 PE=3 SV=1                                            | 34.3 | 76.6  | 6.80E+06 | 9.30E+06 | 1.00E+07 | 9.80E+06 | 1.30E+07 |          | 1.20E+07 |          |
| Q87MZ4 | Acetate kinase I OS=Vibrio parahaemolyticus serotype O3K6 (strain RIMD 2210633) GN=ackA1 PE=3 SV=1                                                        | 26.4 | 43.0  | 7.60E+06 | 1.20E+07 | 1.20E+07 | 1.40E+07 | 1.90E+07 |          | 1.60E+07 |          |
| Q87MZ6 | ABC transporter substrate-binding protein OS=Vibrio parahaemolyticus serotype O3K6 (strain RIMD 2210633) GN=VP2080 PE=4 SV=1                              | 17.4 | 33.2  | 3.00E+06 | 5.90E+06 | 4.80E+06 | 6.80E+06 | 8.50E+06 |          | 7.90E+06 |          |
| Q87N07 | Methionine-tRNA ligase OS=Vibrio parahaemolyticus serotype O3K6 (strain RIMD 2210633) GN=metG PE=3 SV=2                                                   | 8.0  | 77.9  | 3.40E+06 | 5.10E+06 | 4.60E+06 | 5.20E+06 | 6.00E+06 |          | 4.90E+06 |          |
| Q87N14 | Ribonuclease E OS=Vibrio parahaemolyticus serotype O3K6 (strain RIMD 2210633) GN=rne PE=3 SV=1                                                            | 2.1  | 114.1 |          |          | 3.00E+06 |          |          |          |          |          |
| Q87N15 | Ribosomal large subunit pseudouridine synthase C OS=Vibrio parahaemolyticus serotype O3K6 (strain RIMD 2210633) GN=rluC PE=3 SV=1                         | 2.2  | 36.1  | 2.60E+06 |          |          |          |          |          |          |          |
| Q87N21 | Malonyl CoA-acyl carrier protein transacylase OS=Vibrio parahaemolyticus serotype O3K6 (strain RIMD 2210633) GN=VP2055 PE=3 SV=1                          | 5.5  | 32.3  |          |          | 7.70E+06 |          | 1.00E+07 |          | 1.30E+07 | 1.00E+07 |
| Q8     |                                                                                                                                                           |      |       |          |          |          |          |          |          |          |          |

Table S1

|         |                                                                                                                                                                                        |      |       |          |          |          |          |          |          |          |  |
|---------|----------------------------------------------------------------------------------------------------------------------------------------------------------------------------------------|------|-------|----------|----------|----------|----------|----------|----------|----------|--|
| Q87P47  | Putative translocation protein in type III secretion OS=Vibrio parahaemolyticus serotype O3:K6 (strain RIMD 2210633) GN=VP1671 PE=4 SV=1                                               | 3.4  | 36.4  |          | 2.40E+06 |          |          |          |          |          |  |
| Q87P59  | Uncharacterized protein OS=Vibrio parahaemolyticus serotype O3:K6 (strain RIMD 2210633) GN=VP1659 PE=4 SV=1                                                                            | 17.0 | 67.0  | 4.00E+06 | 1.00E+07 | 9.20E+06 | 3.30E+06 | 9.20E+06 | 5.30E+06 |          |  |
| Q87P60  | Low calcium response locus protein H OS=Vibrio parahaemolyticus serotype O3:K6 (strain RIMD 2210633) GN=VP1658 PE=4 SV=1                                                               | 25.9 | 18.1  |          | 4.30E+06 |          | 3.10E+06 | 6.00E+06 | 4.10E+06 |          |  |
| Q87P61  | Putative translocator protein PopB OS=Vibrio parahaemolyticus serotype O3:K6 (strain RIMD 2210633) GN=VP1657 PE=4 SV=1                                                                 | 3.8  | 41.3  |          | 2.10E+06 | 2.90E+06 |          |          | 1.70E+06 |          |  |
| Q87P62  | Putative translocator protein PopD OS=Vibrio parahaemolyticus serotype O3:K6 (strain RIMD 2210633) GN=VP1656 PE=4 SV=1                                                                 | 5.1  | 35.3  | 4.60E+06 | 5.30E+06 | 7.30E+06 | 4.60E+06 | 6.60E+06 | 4.90E+06 |          |  |
| Q87P63  | Immunogenic protein OS=Vibrio parahaemolyticus serotype O3:K6 (strain RIMD 2210633) GN=VP1655 PE=4 SV=1                                                                                | 2.8  | 34.9  |          | 3.10E+07 |          | 2.90E+07 | 4.00E+07 | 3.00E+07 |          |  |
| Q87P69  | RNA chaperone ProQ OS=Vibrio parahaemolyticus serotype O3:K6 (strain RIMD 2210633) GN=proQ PE=3 SV=1                                                                                   | 4.8  | 23.2  |          |          | 6.70E+06 | 9.40E+06 | 7.80E+06 | 7.20E+06 |          |  |
| Q87P83  | Aminopeptidase N OS=Vibrio parahaemolyticus serotype O3:K6 (strain RIMD 2210633) GN=VP1604 PE=4 SV=1                                                                                   | 1.3  | 98.4  |          | 1.50E+06 |          |          |          |          |          |  |
| Q87P85  | Pellucid NAD <sup>+</sup> glutamate dehydrogenase OS=Vibrio parahaemolyticus serotype O3:K6 (strain RIMD 2210633) GN=VP1602 PE=4 SV=1                                                  | 0.4  | 183.4 |          | 1.00E+06 |          |          |          |          |          |  |
| Q87P88  | Gall division protein ZapC OS=Vibrio parahaemolyticus serotype O3:K6 (strain RIMD 2210633) GN=zapC PE=3 SV=1                                                                           | 4.4  | 20.8  | 2.20E+06 |          |          |          |          |          | 3.10E+06 |  |
| Q87PC5  | 3-hydroxydecanoyl-[acyl-carrier-protein] dehydratase OS=Vibrio parahaemolyticus serotype O3:K6 (strain RIMD 2210633) GN=fabA PE=3 SV=1                                                 | 22.1 | 19.0  | 1.60E+07 | 1.20E+07 | 1.60E+07 | 1.40E+07 | 2.00E+07 | 1.60E+07 |          |  |
| Q87PE6  | Uncharacterized protein OS=Vibrio parahaemolyticus serotype O3:K6 (strain RIMD 2210633) GN=VP1564 PE=4 SV=1                                                                            | 13.9 | 58.4  | 3.80E+06 | 7.80E+06 | 5.10E+06 | 5.10E+06 | 7.40E+06 | 5.60E+06 |          |  |
| Q87P66  | Fumarate and nitrate reduction regulatory protein OS=Vibrio parahaemolyticus serotype O3:K6 (strain RIMD 2210633) GN=VP1536 PE=4 SV=1                                                  | 4.4  | 27.8  |          |          | 2.00E+06 | 1.30E+06 | 3.00E+06 |          |          |  |
| Q87PG7  | Putative stress protein OS=Vibrio parahaemolyticus serotype O3:K6 (strain RIMD 2210633) GN=VP1535 PE=4 SV=1                                                                            | 13.7 | 35.3  |          | 2.50E+06 |          | 3.80E+06 | 4.60E+06 | 2.10E+06 |          |  |
| Q87PH6  | Putrescine-binding periplasmic protein OS=Vibrio parahaemolyticus serotype O3:K6 (strain RIMD 2210633) GN=VP1526 PE=3 SV=1                                                             | 3.9  | 39.7  |          |          | 8.10E+06 | 8.40E+06 | 1.10E+07 | 8.60E+06 |          |  |
| Q87PK8  | N-acetyl-D-glucosamine kinase OS=Vibrio parahaemolyticus serotype O3:K6 (strain RIMD 2210633) GN=mgk PE=3 SV=1                                                                         | 8.9  | 32.8  |          |          | 9.20E+05 |          | 4.40E+06 | 3.50E+06 |          |  |
| Q87PL8  | Uncharacterized protein OS=Vibrio parahaemolyticus serotype O3:K6 (strain RIMD 2210633) GN=VP1403 PE=4 SV=1                                                                            | 9.0  | 55.5  | 4.90E+06 | 2.80E+06 | 3.30E+06 |          | 2.90E+06 |          |          |  |
| Q87Q40  | Succinylglutamate desuccinylase OS=Vibrio parahaemolyticus serotype O3:K6 (strain RIMD 2210633) GN=astE PE=1 SV=1                                                                      | 4.4  | 38.8  |          | 2.70E+06 |          |          |          |          |          |  |
| Q87Q45  | Adenosylcobinamide-GDP ribazoletransferase OS=Vibrio parahaemolyticus serotype O3:K6 (strain RIMD 2210633) GN=cobS PE=3 SV=1                                                           | 2.6  | 29.2  |          |          |          | 5.60E+06 |          | 5.40E+06 |          |  |
| Q87Q53  | Phosphoribosylglycinamide formyltransferase 2 OS=Vibrio parahaemolyticus serotype O3:K6 (strain RIMD 2210633) GN=purT PE=3 SV=1                                                        | 3.6  | 42.9  |          |          |          |          |          |          | 2.80E+06 |  |
| Q87Q56  | Integration host factor subunit alpha OS=Vibrio parahaemolyticus serotype O3:K6 (strain RIMD 2210633) GN=ihfA PE=3 SV=1                                                                | 19.4 | 11.2  | 6.20E+06 |          | 7.90E+06 | 3.00E+07 | 2.20E+07 |          |          |  |
| Q87Q59  | Phenylalanine-tRNA ligase beta subunit OS=Vibrio parahaemolyticus serotype O3:K6 (strain RIMD 2210633) GN=pheT PE=3 SV=1                                                               | 4.7  | 87.0  | 3.00E+06 | 5.70E+06 | 6.20E+06 | 7.90E+06 | 9.80E+06 | 5.20E+06 |          |  |
| Q87Q60  | Phenylalanine-tRNA ligase alpha subunit OS=Vibrio parahaemolyticus serotype O3:K6 (strain RIMD 2210633) GN=pheS PE=3 SV=1                                                              | 6.4  | 36.9  |          | 2.90E+06 | 3.50E+06 | 4.40E+06 | 5.40E+06 | 4.10E+06 |          |  |
| Q87Q70  | Threonine-tRNA ligase OS=Vibrio parahaemolyticus serotype O3:K6 (strain RIMD 2210633) GN=thrS PE=3 SV=1                                                                                | 8.9  | 73.7  | 4.40E+06 | 9.50E+06 | 5.00E+06 | 1.10E+07 | 7.60E+06 | 7.60E+06 |          |  |
| Q87Q80  | Uncharacterized protein OS=Vibrio parahaemolyticus serotype O3:K6 (strain RIMD 2210633) GN=VP1270 PE=4 SV=1                                                                            | 2.1  | 112.8 |          | 1.90E+07 |          | 2.70E+07 |          | 2.50E+07 |          |  |
| Q87Q87  | Phosphoribosylaminoimidazole-succinocarboxamide synthase OS=Vibrio parahaemolyticus serotype O3:K6 (strain RIMD 2210633) GN=purC PE=3 SV=1                                             | 11.4 | 41.0  | 2.40E+06 | 5.40E+06 | 5.70E+06 | 7.50E+06 | 1.00E+07 | 6.50E+06 |          |  |
| Q87Q92  | NAD-dependent malic enzyme OS=Vibrio parahaemolyticus serotype O3:K6 (strain RIMD 2210633) GN=maeA PE=3 SV=1                                                                           | 1.6  | 62.3  |          |          | 4.10E+06 | 5.00E+06 |          |          |          |  |
| Q87Q99  | Thioredoxin reductase OS=Vibrio parahaemolyticus serotype O3:K6 (strain RIMD 2210633) GN=trpY1 PE=3 SV=1                                                                               | 10.3 | 34.5  | 2.90E+06 | 5.10E+06 | 2.10E+06 | 5.30E+06 | 1.00E+07 | 5.80E+06 |          |  |
| Q87QA3  | Phosphoserine aminotransferase OS=Vibrio parahaemolyticus serotype O3:K6 (strain RIMD 2210633) GN=serC PE=3 SV=1                                                                       | 28.0 | 40.2  | 9.30E+06 | 1.20E+07 | 1.10E+07 | 1.50E+07 | 1.60E+07 | 1.40E+07 |          |  |
| Q87QB0  | Uncharacterized protein OS=Vibrio parahaemolyticus serotype O3:K6 (strain RIMD 2210633) GN=VP1240 PE=4 SV=1                                                                            | 4.9  | 34.4  | 6.40E+06 | 8.90E+06 | 5.50E+06 | 6.10E+06 |          | 6.20E+06 |          |  |
| Q87QB9  | Putative reductase VP1231 OS=Vibrio parahaemolyticus serotype O3:K6 (strain RIMD 2210633) GN=VP1231 PE=3 SV=1                                                                          | 38.3 | 43.9  | 1.40E+07 | 1.80E+07 | 2.10E+07 | 2.00E+07 | 2.70E+07 | 2.10E+07 |          |  |
| Q87QG7  | Cystathionine beta-lyase OS=Vibrio parahaemolyticus serotype O3:K6 (strain RIMD 2210633) GN=VP1182 PE=3 SV=1                                                                           | 3.2  | 44.6  | 3.60E+06 |          | 5.00E+06 | 5.50E+06 | 6.90E+06 | 7.00E+06 |          |  |
| Q87QJ9  | Cysteine-tRNA ligase OS=Vibrio parahaemolyticus serotype O3:K6 (strain RIMD 2210633) GN=cysE PE=3 SV=1                                                                                 | 11.3 | 52.0  | 1.80E+06 | 4.30E+06 | 2.60E+06 | 3.50E+06 | 3.00E+06 | 3.10E+06 |          |  |
| Q87QK5  | Histidine biosynthesis bifunctional protein HisE OS=Vibrio parahaemolyticus serotype O3:K6 (strain RIMD 2210633) GN=hisL PE=3 SV=1                                                     | 15.2 | 23.2  |          |          |          | 2.30E+06 |          |          |          |  |
| Q87QK6  | Imidazole glycerol phosphate synthase subunit HisF OS=Vibrio parahaemolyticus serotype O3:K6 (strain RIMD 2210633) GN=hisF PE=3 SV=1                                                   | 6.2  | 28.4  |          |          |          | 1.20E+06 |          |          |          |  |
| Q87QK7  | 1-[5-phosphoribosyl]-5-[5-(5-phosphoribosylamino)methylideneamino] imidazole-4-carboxamide isomerase OS=Vibrio parahaemolyticus serotype O3:K6 (strain RIMD 2210633) GN=hisA PE=3 SV=1 | 14.7 | 26.4  |          |          |          | 4.60E+06 | 5.50E+06 | 4.40E+06 |          |  |
| Q87QK8  | Imidazole glycerol phosphate synthase subunit HisH OS=Vibrio parahaemolyticus serotype O3:K6 (strain RIMD 2210633) GN=hisH PE=3 SV=1                                                   | 6.9  | 22.3  |          |          |          |          | 9.70E+06 |          |          |  |
| Q87QK9  | Histidine biosynthesis bifunctional protein HisB OS=Vibrio parahaemolyticus serotype O3:K6 (strain RIMD 2210633) GN=hisB PE=3 SV=1                                                     | 6.2  | 39.8  |          | 2.50E+06 |          | 1.80E+06 | 3.50E+06 |          |          |  |
| Q87QL0  | Histidinol-phosphate aminotransferase OS=Vibrio parahaemolyticus serotype O3:K6 (strain RIMD 2210633) GN=hisC PE=3 SV=1                                                                | 10.1 | 38.2  | 5.70E+06 | 6.30E+06 | 5.60E+06 | 7.70E+06 | 8.70E+06 | 9.00E+06 |          |  |
| Q87QL1  | Histidinol dehydrogenase OS=Vibrio parahaemolyticus serotype O3:K6 (strain RIMD 2210633) GN=hisD PE=3 SV=1                                                                             | 5.8  | 46.1  |          |          | 3.20E+06 | 4.00E+06 | 5.80E+06 | 4.50E+06 |          |  |
| Q87QL2  | ATP phosphoribosyltransferase OS=Vibrio parahaemolyticus serotype O3:K6 (strain RIMD 2210633) GN=hisG PE=3 SV=1                                                                        | 25.8 | 32.8  | 4.10E+06 | 6.90E+06 | 4.80E+06 | 8.80E+06 | 1.20E+07 | 9.00E+06 |          |  |
| Q87QL6  | DNA-binding protein OS=Vibrio parahaemolyticus serotype O3:K6 (strain RIMD 2210633) GN=VP1133 PE=3 SV=1                                                                                | 9.6  | 15.1  |          |          |          |          |          |          |          |  |
| Q87QM1  | Adenylosuccinate lyase OS=Vibrio parahaemolyticus serotype O3:K6 (strain RIMD 2210633) GN=VP1128 PE=3 SV=1                                                                             | 26.1 | 51.4  | 5.20E+06 | 8.70E+06 | 9.20E+06 | 9.30E+06 | 1.30E+07 | 8.40E+06 |          |  |
| Q87QPM1 | Serine-tRNA ligase OS=Vibrio parahaemolyticus serotype O3:K6 (strain RIMD 2210633) GN=serP PE=3 SV=1                                                                                   | 33.1 | 48.8  | 7.80E+06 | 1.10E+07 | 1.10E+07 | 9.80E+06 | 1.50E+07 | 1.40E+07 |          |  |
| Q87QP5  | Leucine-responsive regulatory protein OS=Vibrio parahaemolyticus serotype O3:K6 (strain RIMD 2210633) GN=VP1104 PE=4 SV=1                                                              | 31.1 | 18.8  | 5.70E+06 | 7.00E+06 | 4.70E+06 | 7.40E+06 | 1.00E+07 | 4.80E+06 |          |  |
| Q87Q96  | Alanine dehydrogenase OS=Vibrio parahaemolyticus serotype O3:K6 (strain RIMD 2210633) GN=VP1103 PE=3 SV=1                                                                              | 42.2 | 39.9  | 1.70E+07 | 3.30E+07 | 2.10E+07 | 3.10E+07 | 2.20E+07 | 2.00E+07 |          |  |
| Q87QP8  | Cys regulon transcriptional activator OS=Vibrio parahaemolyticus serotype O3:K6 (strain RIMD 2210633) GN=VP1101 PE=4 SV=1                                                              | 3.7  | 36.1  |          |          |          |          |          |          |          |  |
| Q87Q57  | Putative helicase OS=Vibrio parahaemolyticus serotype O3:K6 (strain RIMD 2210633) GN=VP1072 PE=4 SV=1                                                                                  | 16.0 | 68.7  | 4.30E+06 | 5.80E+06 | 4.60E+06 | 4.60E+06 | 7.80E+06 | 5.80E+06 |          |  |
| Q87Q79  | Protein ToIB OS=Vibrio parahaemolyticus serotype O3:K6 (strain RIMD 2210633) GN=toIB PE=3 SV=1                                                                                         | 7.3  | 49.8  | 9.60E+05 | 5.10E+06 | 5.00E+06 | 5.50E+06 | 6.40E+06 | 3.50E+06 |          |  |
| Q87QV2  | Aspartate-tRNA ligase OS=Vibrio parahaemolyticus serotype O3:K6 (strain RIMD 2210633) GN=aspS PE=3 SV=1                                                                                | 35.6 | 65.7  | 1.10E+07 | 1.70E+07 | 1.60E+07 | 1.50E+07 | 2.20E+07 | 1.60E+07 |          |  |
| Q87QW9  | HTH-type transcriptional repressor PurR OS=Vibrio parahaemolyticus serotype O3:K6 (strain RIMD 2210633) GN=purR PE=3 SV=1                                                              | 4.2  | 37.7  |          |          | 1.90E+06 |          |          |          |          |  |
| Q87QX6  | Glucose-1-phosphate adenylyltransferase 1 OS=Vibrio parahaemolyticus serotype O3:K6 (strain RIMD 2210633) GN=glgC1 PE=3 SV=1                                                           | 26.2 | 45.5  | 1.60E+07 | 1.90E+07 | 1.90E+07 | 1.70E+07 | 2.50E+07 | 1.90E+07 |          |  |
| Q87QX9  | 3-phosphoshikimate 1-carboxyvinyltransferase OS=Vibrio parahaemolyticus serotype O3:K6 (strain RIMD 2210633) GN=aroA PE=3 SV=1                                                         | 4.7  | 46.1  | 2.20E+06 |          | 4.60E+06 |          | 5.00E+06 | 5.20E+06 |          |  |
| Q87QY4  | ATP-dependent Clp protease, ATP-binding subunit ClpA OS=Vibrio parahaemolyticus serotype O3:K6 (strain RIMD 2210633) GN=VP1014 PE=3 SV=1                                               | 4.2  | 83.3  |          | 2.20E+06 |          |          | 5.30E+06 | 2.90E+06 |          |  |
| Q87QY7  | Isocitrate dehydrogenase OS=Vibrio parahaemolyticus serotype O3:K6 (strain RIMD 2210633) GN=VP1011 PE=4 SV=1                                                                           | 48.9 | 80.5  | 2.10E+07 | 2.70E+07 | 2.60E+07 | 2.50E+07 | 3.50E+07 | 2.80E+07 |          |  |
| Q87QZ9  | Amino acid ABC transporter, periplasmic amino acid-binding protein OS=Vibrio parahaemolyticus serotype O3:K6 (strain RIMD 2210633) GN=VP0999 PE=3 SV=1                                 | 57.4 | 28.4  | 7.00E+06 | 1.20E+07 | 1.10E+07 | 1.50E+07 | 2.20E+07 | 1.60E+07 |          |  |
| Q87R02  | Putative 54 kDa polar flagellar sheath protein A OS=Vibrio parahaemolyticus serotype O3:K6 (strain RIMD 2210633) GN=VP0996 PE=4 SV=1                                                   | 2.1  | 52.3  |          |          |          |          |          |          |          |  |
| Q87R04  | Formate acetyltransferase OS=Vibrio parahaemolyticus serotype O3:K6 (strain RIMD 2210633) GN=VP0994 PE=4 SV=1                                                                          | 47.4 | 84.5  | 3.50E+07 | 3.90E+07 | 4.20E+07 | 5.10E+07 | 7.30E+07 | 6.20E+07 |          |  |
| Q87R36  | Uncharacterized protein OS=Vibrio parahaemolyticus serotype O3:K6 (strain RIMD 2210633) GN=VP0962 PE=4 SV=1                                                                            | 21.2 | 43.9  |          | 4.90E+06 | 1.20E+07 | 6.50E+06 | 8.40E+06 | 8.80E+06 |          |  |
| Q87R38  | Uridine phosphorylase OS=Vibrio parahaemolyticus serotype O3:K6 (strain RIMD 2210633) GN=VP0960 PE=3 SV=1                                                                              | 11.5 | 26.9  | 1.50E+06 | 7.40E+06 | 7.70E+06 | 7.00E+06 | 7.50E+06 | 6.50E+06 |          |  |
| Q87R78  | DNA-binding protein HU-beta OS=Vibrio parahaemolyticus serotype O3:K6 (strain RIMD 2210633) GN=VP0920 PE=3 SV=1                                                                        | 28.9 | 9.4   | 4.70E+07 | 4.30E+07 | 5.10E+07 | 9.10E+07 | 7.70E+07 | 6.60E+07 |          |  |
| Q87R80  | ATP-dependent Clp protease proteolytic subunit OS=Vibrio parahaemolyticus serotype O3:K6 (strain RIMD 2210633) GN=clpP PE=3 SV=1                                                       | 16.0 | 22.0  | 1.30E+07 | 2.20E+07 | 1.50E+07 | 2.00E+07 | 3.20E+07 | 2.90E+07 |          |  |
| Q87R81  | Trigger factor OS=Vibrio parahaemolyticus serotype O3:K6 (strain RIMD 2210633) GN=trf PE=3 SV=1                                                                                        | 53.5 | 48.2  | 1.50E+07 | 1.90E+07 | 2.30E+07 | 3.60E+07 | 4.80E+07 | 3.40E+07 |          |  |
| Q87R87  | C4-dicarboxylate-binding periplasmic protein OS=Vibrio parahaemolyticus serotype O3:K6 (strain RIMD 2210633) GN=VP0910 PE=4 SV=1                                                       | 24.7 | 37.1  | 1.20E+07 | 4.80E+06 | 7.30E+06 | 2.00E+07 | 1.80E+07 | 1.50E+07 |          |  |
| Q87R83  | Formyltetrahydrofolate deformylase OS=Vibrio parahaemolyticus serotype O3:K6 (strain RIMD 2210633) GN=purU PE=3 SV=1                                                                   | 3.2  | 31.6  | 5.30E+06 | 6.90E+06 | 7.30E+06 | 4.40E+06 | 7.60E+06 |          |          |  |
| Q87RD6  | Arginine-tRNA ligase OS=Vibrio parahaemolyticus serotype O3:K6 (strain RIMD 2210633) GN=argS PE=3 SV=1                                                                                 | 10.6 | 63.8  |          | 4.60E+06 | 3.30E+06 | 5.20E+06 | 6.60E+06 | 5.80E+06 |          |  |
| Q87RE4  | Zinc ABC transporter, periplasmic zinc-binding protein OS=Vibrio parahaemolyticus serotype O3:K6 (strain RIMD 2210633) GN=VP0853 PE=3 SV=1                                             | 11.3 | 32.1  | 3.40E+06 | 4.00E+06 | 4.70E+06 | 6.00E+06 | 5.70E+06 | 3.90E+06 |          |  |
| Q87RE7  | Succinyl-CoA ligase [ADP-forming] subunit alpha OS=Vibrio parahaemolyticus serotype O3:K6 (strain RIMD 2210633) GN=VP0850 PE=3 SV=1                                                    | 16.6 | 30.0  | 6.10E+06 | 1.50E+07 | 1.00E+07 | 1.40E+07 | 1.60E+07 | 1.20E+07 |          |  |
| Q87RE8  | Succinyl-CoA ligase [ADP-forming] subunit beta OS=Vibrio parahaemolyticus serotype O3:K6 (strain RIMD 2210633) GN=sucC PE=3 SV=1                                                       | 50.5 | 41.5  | 2.80E+07 | 4.30E+07 | 3.30E+07 | 3.90E+07 | 5.10E+07 | 3.50E+07 |          |  |
| Q87RE9  | Dihydrodipicolinate residue succinyltransferase component of 2-oxoglutarate dehydrogenase complex OS=Vibrio parahaemolyticus serotype O3:K6 (strain RIMD 2210633) GN=VP0848 PE=3 SV=1  | 33.2 | 43.7  | 1.90E+07 | 2.80E+07 | 2.60E+07 | 3.00E+07 | 3.10E+07 | 2.6      |          |  |



Table S1

|        |                                                                                                                                                   |      |       |          |          |          |          |          |          |
|--------|---------------------------------------------------------------------------------------------------------------------------------------------------|------|-------|----------|----------|----------|----------|----------|----------|
| Q87RV7 | Uncharacterized protein OS=Vibrio parahaemolyticus serotype O3:K6 (strain RIMD 2210633) GN=VP0669 PE=4 SV=1                                       | 20.5 | 39.0  | 2.70E+06 | 7.80E+06 | 7.70E+06 | 6.90E+06 | 5.70E+06 | 9.30E+06 |
| Q87RW0 | Phosphoribosylformylglycinamide synthase OS=Vibrio parahaemolyticus serotype O3:K6 (strain RIMD 2210633) GN=purL PE=3 SV=1                        | 13.4 | 141.6 | 3.60E+06 | 5.80E+06 | 6.40E+06 | 6.80E+06 | 1.10E+07 | 6.10E+06 |
| Q87RX2 | Chaperone protein DnaJ OS=Vibrio parahaemolyticus serotype O3:K6 (strain RIMD 2210633) GN=dnaJ PE=3 SV=1                                          | 3.1  | 41.0  |          |          |          |          | 3.00E+06 | 2.60E+06 |
| Q87RX3 | Chaperone protein DnaK OS=Vibrio parahaemolyticus serotype O3:K6 (strain RIMD 2210633) GN=dnaK PE=3 SV=1                                          | 52.3 | 69.0  | 8.70E+06 | 1.50E+07 | 1.70E+07 | 2.40E+07 | 3.40E+07 | 2.70E+07 |
| Q87RZ5 | Homocysteine synthase OS=Vibrio parahaemolyticus serotype O3:K6 (strain RIMD 2210633) GN=VP0629 PE=3 SV=1                                         | 2.8  | 45.7  | 4.50E+05 |          |          |          | 1.60E+06 |          |
| Q87S07 | GMP synthase [glutamine-hydrolyzing] OS=Vibrio parahaemolyticus serotype O3:K6 (strain RIMD 2210633) GN=guaA PE=3 SV=1                            | 6.6  | 57.6  | 5.10E+06 | 6.30E+06 | 3.80E+06 | 8.10E+06 | 9.00E+06 | 5.30E+06 |
| Q87S08 | Inosine-5'-monophosphate dehydrogenase OS=Vibrio parahaemolyticus serotype O3:K6 (strain RIMD 2210633) GN=guaB PE=3 SV=1                          | 26.5 | 51.9  | 4.50E+06 | 8.00E+06 | 7.50E+06 | 8.60E+06 | 1.20E+07 | 8.10E+06 |
| Q87S15 | Histidine-tRNA ligase OS=Vibrio parahaemolyticus serotype O3:K6 (strain RIMD 2210633) GN=hisE PE=3 SV=1                                           | 85.5 | 47.1  |          |          | 2.00E+06 | 7.00E+06 |          | 2.30E+06 |
| Q87S20 | Nucleoside diphosphate kinase OS=Vibrio parahaemolyticus serotype O3:K6 (strain RIMD 2210633) GN=ndk PE=3 SV=1                                    | 6.4  | 15.9  |          |          |          |          |          | 1.50E+06 |
| Q87S21 | Peptidase B OS=Vibrio parahaemolyticus serotype O3:K6 (strain RIMD 2210633) GN=pepB PE=3 SV=1                                                     | 8.3  | 46.6  |          | 6.00E+06 | 4.40E+06 | 7.50E+06 | 7.70E+06 |          |
| Q87S40 | Iso citrate lyase OS=Vibrio parahaemolyticus serotype O3:K6 (strain RIMD 2210633) GN=VP0584 PE=4 SV=1                                             | 2.5  | 48.0  |          |          |          | 4.00E+06 |          |          |
| Q87S44 | Antioxidant, AhpC/7sa family OS=Vibrio parahaemolyticus serotype O3:K6 (strain RIMD 2210633) GN=VP0580 PE=4 SV=1                                  | 58.1 | 22.2  | 3.40E+07 | 5.00E+07 | 5.20E+07 | 9.30E+07 | 9.40E+07 | 8.10E+07 |
| Q87S63 | Chaperone protein ClpB OS=Vibrio parahaemolyticus serotype O3:K6 (strain RIMD 2210633) GN=clpB PE=3 SV=1                                          | 14.5 | 95.8  | 2.80E+06 | 4.80E+06 | 5.50E+06 | 6.40E+06 | 7.10E+06 | 6.90E+06 |
| Q87S69 | Chorismate mutase/prephenate dehydratase OS=Vibrio parahaemolyticus serotype O3:K6 (strain RIMD 2210633) GN=VP0555 PE=4 SV=1                      | 3.1  | 44.2  |          | 1.40E+06 |          |          | 1.50E+06 | 1.30E+06 |
| Q87S73 | ABC transporter, ATP-binding protein OS=Vibrio parahaemolyticus serotype O3:K6 (strain RIMD 2210633) GN=VP0551 PE=3 SV=1                          | 5.2  | 62.2  |          | 7.20E+05 |          |          |          | 3.20E+06 |
| Q87S77 | T-protein OS=Vibrio parahaemolyticus serotype O3:K6 (strain RIMD 2210633) GN=VP0457 PE=4 SV=1                                                     | 2.1  | 42.0  |          |          |          |          |          | 2.10E+06 |
| Q87S78 | Phospho-2'-dehydro-3'-deoxyheptanate aldolase OS=Vibrio parahaemolyticus serotype O3:K6 (strain RIMD 2210633) GN=VP0546 PE=3 SV=1                 | 2.0  | 39.7  |          |          | 4.00E+06 |          | 5.70E+06 | 5.40E+06 |
| Q87S84 | Putative carbon starvation protein A OS=Vibrio parahaemolyticus serotype O3:K6 (strain RIMD 2210633) GN=VP0540 PE=4 SV=1                          | 2.4  | 53.3  |          |          | 1.70E+06 |          |          | 1.70E+06 |
| Q87S90 | Isoleucine-tRNA ligase OS=Vibrio parahaemolyticus serotype O3:K6 (strain RIMD 2210633) GN=ileS PE=3 SV=1                                          | 2.0  | 105.2 | 2.90E+06 | 2.70E+06 | 2.10E+06 | 3.30E+06 |          | 3.50E+06 |
| Q87S93 | 30S ribosomal protein S20 OS=Vibrio parahaemolyticus serotype O3:K6 (strain RIMD 2210633) GN=rpsT PE=3 SV=1                                       | 11.6 | 9.5   |          |          |          |          | 7.20E+06 |          |
| Q87S99 | Uncharacterized protein OS=Vibrio parahaemolyticus serotype O3:K6 (strain RIMD 2210633) GN=VP0525 PE=4 SV=1                                       | 3.1  | 43.9  |          | 2.80E+06 |          |          |          |          |
| Q87SA8 | Oxidoreductase, Tas, aldo/keto reductase family OS=Vibrio parahaemolyticus serotype O3:K6 (strain RIMD 2210633) GN=VP0516 PE=4 SV=1               | 14.2 | 39.7  | 4.20E+06 | 6.70E+06 | 5.80E+06 | 6.60E+06 | 6.50E+06 | 7.50E+06 |
| Q87SB0 | Sigma-54 dependent transcriptional regulator OS=Vibrio parahaemolyticus serotype O3:K6 (strain RIMD 2210633) GN=VP0514 PE=4 SV=1                  | 2.0  | 49.6  |          |          |          |          | 3.00E+06 |          |
| Q87SB1 | Lysine-tRNA ligase OS=Vibrio parahaemolyticus serotype O3:K6 (strain RIMD 2210633) GN=lysS PE=3 SV=1                                              | 30.1 | 57.5  | 1.20E+07 | 3.80E+07 | 1.40E+07 | 1.60E+07 | 1.30E+07 | 1.50E+07 |
| Q87SC7 | Autonomic glycol radical cofactor OS=Vibrio parahaemolyticus serotype O3:K6 (strain RIMD 2210633) GN=grcA PE=3 SV=1                               | 73.6 | 13.9  | 7.90E+06 | 1.10E+07 | 9.20E+06 | 3.30E+07 | 3.80E+07 | 3.10E+07 |
| Q87SC8 | Threonine synthase OS=Vibrio parahaemolyticus serotype O3:K6 (strain RIMD 2210633) GN=VP0496 PE=4 SV=1                                            | 38.5 | 46.5  | 9.00E+06 | 1.20E+07 | 1.10E+07 | 1.30E+07 | 1.70E+07 | 1.60E+07 |
| Q87SC9 | Homoserine kinase OS=Vibrio parahaemolyticus serotype O3:K6 (strain RIMD 2210633) GN=thrB PE=3 SV=1                                               | 2.8  | 34.4  | 3.40E+06 | 3.60E+06 |          | 4.80E+06 | 6.20E+06 | 4.90E+06 |
| Q87SD0 | Aspartokinase I/homoserine dehydrogenase, threonine-sensitive OS=Vibrio parahaemolyticus serotype O3:K6 (strain RIMD 2210633) GN=VP0494 PE=4 SV=1 | 18.9 | 88.4  | 9.70E+06 | 1.20E+07 | 9.60E+06 | 1.10E+07 | 1.40E+07 | 1.10E+07 |
| Q87SD2 | Putative 4-hydroxy-4-methyl-2-oxoglutarate aldolase OS=Vibrio parahaemolyticus serotype O3:K6 (strain RIMD 2210633) GN=VP0492 PE=3 SV=1           | 6.3  | 17.7  |          |          |          |          |          | 4.90E+06 |
| Q87SD5 | Aerobic respiration control protein FexA OS=Vibrio parahaemolyticus serotype O3:K6 (strain RIMD 2210633) GN=VP0489 PE=4 SV=1                      | 9.2  | 26.9  |          | 7.10E+06 | 6.90E+06 | 9.70E+06 | 6.80E+06 | 1.00E+07 |
| Q87SE0 | Glutamate synthase, large subunit OS=Vibrio parahaemolyticus serotype O3:K6 (strain RIMD 2210633) GN=VP0484 PE=4 SV=1                             | 6.1  | 175.2 | 3.20E+06 | 3.10E+06 | 3.30E+06 | 6.00E+06 | 7.80E+06 | 5.20E+06 |
| Q87SE1 | Glutamate synthase, small subunit OS=Vibrio parahaemolyticus serotype O3:K6 (strain RIMD 2210633) GN=VP0483 PE=4 SV=1                             | 9.0  | 53.3  |          |          |          | 5.00E+06 | 6.60E+06 |          |
| Q87SE2 | Glutamate synthase, large subunit OS=Vibrio parahaemolyticus serotype O3:K6 (strain RIMD 2210633) GN=VP0482 PE=4 SV=1                             | 3.5  | 162.9 | 3.00E+06 | 4.30E+06 | 5.10E+06 | 4.40E+06 |          | 4.50E+06 |
| Q87SE3 | Glutamate synthase, small subunit OS=Vibrio parahaemolyticus serotype O3:K6 (strain RIMD 2210633) GN=VP0481 PE=4 SV=1                             | 4.0  | 52.5  |          |          |          |          |          | 1.80E+06 |
| Q87SF3 | Carbamoyl-phosphate synthase large chain OS=Vibrio parahaemolyticus serotype O3:K6 (strain RIMD 2210633) GN=carB PE=3 SV=1                        | 11.4 | 117.8 | 1.20E+07 | 6.00E+06 | 6.70E+06 | 8.50E+06 | 1.20E+07 | 8.00E+06 |
| Q87SF4 | Carbamoyl-phosphate synthase small chain OS=Vibrio parahaemolyticus serotype O3:K6 (strain RIMD 2210633) GN=carA PE=3 SV=1                        | 15.8 | 41.0  | 2.60E+06 | 5.90E+06 | 5.50E+06 | 7.70E+06 | 1.20E+07 | 8.80E+06 |
| Q87SF5 | 4-hydroxy-tetrahydronicotinamide reductase OS=Vibrio parahaemolyticus serotype O3:K6 (strain RIMD 2210633) GN=dapB PE=3 SV=1                      | 18.2 | 28.6  | 4.70E+06 | 7.30E+06 | 8.20E+06 | 1.20E+07 | 1.20E+07 | 1.00E+07 |
| Q87SF7 | Protein translocase subunit SecA OS=Vibrio parahaemolyticus serotype O3:K6 (strain RIMD 2210633) GN=secA PE=3 SV=1                                | 4.8  | 103.1 |          | 2.30E+06 | 2.30E+06 | 6.80E+06 |          | 3.90E+06 |
| Q87SH9 | Stringent starvation protein A OS=Vibrio parahaemolyticus serotype O3:K6 (strain RIMD 2210633) GN=VP0444 PE=3 SV=1                                | 43.1 | 24.3  | 1.20E+07 | 1.80E+07 | 1.80E+07 | 1.80E+07 | 2.40E+07 | 1.90E+07 |
| Q87S14 | 30S ribosomal protein S9 OS=Vibrio parahaemolyticus serotype O3:K6 (strain RIMD 2210633) GN=rpsI PE=3 SV=1                                        | 9.2  | 14.6  |          |          |          | 2.50E+06 |          |          |
| Q87S15 | 50S ribosomal protein L13 OS=Vibrio parahaemolyticus serotype O3:K6 (strain RIMD 2210633) GN=rplM PE=3 SV=1                                       | 33.1 | 16.0  |          | 1.60E+06 | 7.40E+06 | 9.30E+06 | 1.50E+07 |          |
| Q87S16 | Protease DO OS=Vibrio parahaemolyticus serotype O3:K6 (strain RIMD 2210633) GN=VP0433 PE=4 SV=1                                                   | 26.4 | 48.1  | 5.10E+06 | 7.20E+06 | 6.70E+06 | 8.70E+06 | 1.50E+07 | 8.60E+06 |
| Q87SL8 | RNA polymerase sigma factor RpoD OS=Vibrio parahaemolyticus serotype O3:K6 (strain RIMD 2210633) GN=rpoD PE=3 SV=1                                | 8.2  | 70.7  | 4.50E+06 | 4.30E+06 | 6.80E+06 | 8.90E+06 | 9.00E+06 | 6.60E+06 |
| Q87SR3 | Glutamine-fructose-6-phosphate aminotransferase [isomerizing] OS=Vibrio parahaemolyticus serotype O3:K6 (strain RIMD 2210633) GN=glmS PE=3 SV=2   | 24.6 | 66.8  | 3.90E+06 | 8.80E+06 | 6.70E+06 | 1.10E+07 | 4.90E+06 | 1.50E+07 |
| Q87SR6 | Pyruvate kinase OS=Vibrio parahaemolyticus serotype O3:K6 (strain RIMD 2210633) GN=VP0356 PE=3 SV=1                                               | 15.7 | 49.9  | 4.00E+06 | 3.80E+06 | 4.90E+06 | 5.90E+06 | 1.30E+07 | 9.40E+06 |
| Q87SS7 | 2-isopropylmalate synthase OS=Vibrio parahaemolyticus serotype O3:K6 (strain RIMD 2210633) GN=leuA PE=3 SV=1                                      | 8.7  | 56.1  | 3.40E+06 | 4.20E+06 | 3.50E+06 | 5.40E+06 | 4.80E+06 | 5.90E+06 |
| Q87SS8 | 3-isopropylmalate dehydrogenase OS=Vibrio parahaemolyticus serotype O3:K6 (strain RIMD 2210633) GN=leuB PE=3 SV=1                                 | 40.8 | 39.3  | 1.00E+07 | 1.40E+07 | 1.30E+07 | 1.80E+07 | 2.10E+07 | 1.70E+07 |
| Q87SS9 | 3-isopropylmalate dehydratase large subunit OS=Vibrio parahaemolyticus serotype O3:K6 (strain RIMD 2210633) GN=leuC PE=3 SV=1                     | 2.1  | 50.6  |          | 2.30E+06 |          | 6.40E+05 | 1.40E+06 |          |
| Q87ST4 | Chaperone SurA OS=Vibrio parahaemolyticus serotype O3:K6 (strain RIMD 2210633) GN=surA PE=3 SV=1                                                  | 2.3  | 47.4  |          |          |          |          |          | 4.70E+06 |
| Q87SL4 | 50S ribosomal protein L21 OS=Vibrio parahaemolyticus serotype O3:K6 (strain RIMD 2210633) GN=rplJ PE=3 SV=1                                       | 60.2 | 11.5  | 1.10E+07 | 1.20E+07 | 1.80E+07 | 2.30E+07 | 2.60E+07 | 2.10E+07 |
| Q87SU5 | Octaprenyl-diphosphate synthase OS=Vibrio parahaemolyticus serotype O3:K6 (strain RIMD 2210633) GN=VP0327 PE=3 SV=1                               | 3.3  | 36.4  |          |          | 1.20E+06 |          |          |          |
| Q87SU7 | Malate dehydrogenase OS=Vibrio parahaemolyticus serotype O3:K6 (strain RIMD 2210633) GN=mdh PE=3 SV=1                                             | 61.7 | 32.2  | 2.80E+07 | 3.60E+07 | 2.50E+07 | 3.70E+07 | 5.10E+07 | 2.70E+07 |
| Q87SV0 | Immunogenic protein OS=Vibrio parahaemolyticus serotype O3:K6 (strain RIMD 2210633) GN=VP0323 PE=4 SV=1                                           | 53.7 | 34.5  | 4.30E+07 | 5.10E+07 | 5.30E+07 | 5.20E+07 | 7.00E+07 | 6.10E+07 |
| Q87SW0 | Fructose-1,6-bisphosphatase class 1 OS=Vibrio parahaemolyticus serotype O3:K6 (strain RIMD 2210633) GN=fbp PE=3 SV=1                              | 29.9 | 37.3  | 8.00E+06 | 2.00E+07 | 9.90E+06 | 1.30E+07 | 7.30E+06 | 7.20E+06 |
| Q87SW1 | Inorganic pyrophosphatase OS=Vibrio parahaemolyticus serotype O3:K6 (strain RIMD 2210633) GN=ppa PE=3 SV=1                                        | 19.3 | 19.6  |          | 2.70E+06 |          | 1.10E+07 | 8.60E+06 | 7.00E+06 |
| Q87SW6 | Peptide methionine sulfide reductase MsrA OS=Vibrio parahaemolyticus serotype O3:K6 (strain RIMD 2210633) GN=msrA PE=3 SV=1                       | 9.9  | 23.6  |          |          |          |          | 3.00E+06 | 3.30E+06 |
| Q87SX0 | Uncharacterized protein OS=Vibrio parahaemolyticus serotype O3:K6 (strain RIMD 2210633) GN=VP0302 PE=4 SV=1                                       | 3.8  | 23.3  | 3.50E+06 |          | 4.50E+06 |          | 1.50E+07 | 8.40E+06 |
| Q87SX9 | Sulfate adenylyltransferase subunit 1 OS=Vibrio parahaemolyticus serotype O3:K6 (strain RIMD 2210633) GN=cysN PE=3 SV=1                           | 22.5 | 52.6  | 5.70E+06 | 7.10E+06 | 7.20E+06 | 1.00E+07 | 1.40E+07 | 1.60E+07 |
| Q87SY0 | Sulfate adenylyltransferase subunit 2 OS=Vibrio parahaemolyticus serotype O3:K6 (strain RIMD 2210633) GN=cysD PE=3 SV=1                           | 3.6  | 35.0  |          | 4.90E+06 | 5.10E+06 | 4.60E+06 | 7.10E+06 | 6.40E+06 |
| Q87SY1 | Uroporphyrin-III C-methyltransferase OS=Vibrio parahaemolyticus serotype O3:K6 (strain RIMD 2210633) GN=VP0291 PE=3 SV=1                          | 3.6  | 33.0  |          |          |          |          | 5.30E+06 |          |
| Q87SY2 | 2',3'-cyclic-nucleotide 2'-phosphodiesterase OS=Vibrio parahaemolyticus serotype O3:K6 (strain RIMD 2210633) GN=VP0290 PE=3 SV=1                  | 1.8  | 72.1  |          |          |          | 1.20E+06 |          |          |
| Q87SY7 | Peptidyl-prolyl cis-trans isomerase OS=Vibrio parahaemolyticus serotype O3:K6 (strain RIMD 2210633) GN=VP0285 PE=4 SV=1                           | 6.3  | 21.8  |          |          |          | 5.20E+06 | 7.30E+06 | 4.20E+06 |
| Q87SY9 | 50S ribosomal protein L17 OS=Vibrio parahaemolyticus serotype O3:K6 (strain RIMD 2210633) GN=rplQ PE=3 SV=1                                       | 38.9 | 14.2  | 1.00E+07 | 1.30E+07 | 1.90E+07 | 1.70E+07 | 2.30E+07 | 1.60E+07 |
| Q87SZ0 | DNA-directed RNA polymerase subunit alpha OS=Vibrio parahaemolyticus serotype O3:K6 (strain RIMD 2210633) GN=rpoA PE=3 SV=1                       | 43.0 | 36.5  | 1.30E+07 | 1.70E+07 | 1.70E+07 | 2.80E+07 | 3.60E+07 | 2.60E+07 |
| Q87SZ1 | 30S ribosomal protein S4 OS=Vibrio parahaemolyticus serotype O3:K6 (strain RIMD 2210633) GN=rpsD PE=3 SV=1                                        | 39.3 | 23.3  | 2.30E+07 | 2.10E+07 | 3.50E+07 | 4.10E+07 | 4.20E+07 | 3.40E+07 |
| Q87SZ2 | 30S ribosomal protein S13 OS=Vibrio parahaemolyticus serotype O3:K6 (strain RIMD 2210633) GN=rpsM PE=3 SV=1                                       | 56.8 | 13.3  | 1.00E+07 | 6.10E+06 | 1.70E+07 | 2.20E+07 | 2.00E+07 | 1.50E+07 |
| Q87SZ4 | 50S ribosomal protein L15 OS=Vibrio parahaemolyticus serotype O3:K6 (strain RIMD 2210633) GN=rplO PE=3 SV=1                                       | 31.3 | 14.9  | 6.20E+06 | 9.60E+06 | 9.30E+06 | 1.50E+07 | 1.70E+07 | 1.40E+07 |
| Q87SZ6 | 30S ribosomal protein S5 OS=Vibrio parahaemolyticus serotype O3:K6 (strain RIMD 2210633) GN=rpsE PE=3 SV=1                                        | 51.5 | 17.6  | 1.70E+07 | 1.70E+07 | 2.70E+07 | 2.80E+07 | 3.30E+07 | 2.40E+07 |
| Q87SZ7 | 50S ribosomal protein L18 OS=Vibrio parahaemolyticus serotype O3:K6 (strain RIMD 2210633) GN=rplR PE=3 SV=1                                       | 15.4 | 12.6  |          | 3.20E+06 | 9.40E+06 | 6.50E+06 | 6.80E+06 |          |
| Q87SZ8 | 50S ribosomal protein L6 OS=Vibrio parahaemolyticus serotype O3:K6 (strain RIMD 2210633) GN=rplP PE=3 SV=1                                        | 72.3 | 18.8  | 1.20E+07 | 1.00E+07 | 1.70E+07 | 2.80E+07 | 2.30E+07 | 1.40E+07 |
| Q87SZ9 | 30S ribosomal protein S8 OS=Vibrio parahaemolyticus serotype O3:K6 (strain RIMD 2210633) GN=rpsH PE=3 SV=1                                        | 23.8 | 14.0  | 1.90E+07 | 2.00E+07 | 2.60E+07 | 3.40E+07 | 3.80E+07 | 2.60E+07 |
| Q87T01 | 50S ribosomal protein L5 OS=Vibrio parahaemolyticus serotype O3:K6 (strain RIMD 2210633) GN=rplP PE=3 SV=1                                        | 52.0 | 20.1  | 1.60E+07 | 2.20E+07 | 2.80E+07 | 3.60E+07 | 3.80E+07 | 3.20E+07 |
| Q87T02 | 50S ribosomal protein L24 OS=Vibrio parahaemolyticus serotype O3:K6 (strain RIMD 2210633) GN=rplX PE=3 SV=1                                       | 20.0 | 11.2  | 1.00E+07 | 1.10E+07 | 1.10E+07 | 2.60E+07 | 1.10E+07 | 7.20E+06 |
| Q87T07 | 30S ribosomal protein S3 OS=Vibrio parahaemolyticus serotype O3:K6 (strain RIMD 2210633) GN=rpsC PE=3 SV=1                                        | 36.2 | 25.6  | 1.20E+07 | 1.50E+07 | 2.10E+07 | 2.40E+07 | 2.60E+07 | 2.20E+07 |
| Q87T08 | 50S rib                                                                                                                                           |      |       |          |          |          |          |          |          |

Table S1

| Accession                                  | Description                                                                                                                                                | Coverage | MW [kDa] | Control  | GloNAo   | GloN     | (GloNAo)2 | (GloN)2  | GloNAo-GloN |  |
|--------------------------------------------|------------------------------------------------------------------------------------------------------------------------------------------------------------|----------|----------|----------|----------|----------|-----------|----------|-------------|--|
| Q87TJ9                                     | Oligopeptidase A OS=Vibrio parahaemolyticus serotype O3:K6 (strain RIMD 2210633) GN=VP0070 PE=3 SV=1                                                       | 11.9     | 76.9     | 2.10E+07 | 3.30E+07 | 9.30E+06 | 4.20E+07  | 6.20E+07 | 1.70E+07    |  |
| Q87TK1                                     | Glutathione reductase OS=Vibrio parahaemolyticus serotype O3:K6 (strain RIMD 2210633) GN=VP0068 PE=3 SV=1                                                  | 22.4     | 49.2     | 1.10E+07 | 1.40E+07 | 1.50E+07 | 1.60E+07  | 2.10E+07 | 1.90E+07    |  |
| Q87TM1                                     | Peptide ABC transporter, periplasmic peptide-binding protein OS=Vibrio parahaemolyticus serotype O3:K6 (strain RIMD 2210633) GN=VP0048 PE=4 SV=1           | 63.2     | 57.4     | 4.50E+07 | 5.60E+07 | 6.40E+07 | 6.50E+07  | 8.50E+07 | 6.80E+07    |  |
| Q87TN4                                     | Ketol-acid reductoisomerase OS=Vibrio parahaemolyticus serotype O3:K6 (strain RIMD 2210633) GN=ihvC PE=3 SV=1                                              | 57.3     | 54.7     | 2.90E+07 | 4.00E+07 | 3.70E+07 | 4.30E+07  | 6.90E+07 | 5.10E+07    |  |
| Q87TP7                                     | Glycine-tRNA ligase alpha subunit OS=Vibrio parahaemolyticus serotype O3:K6 (strain RIMD 2210633) GN=glyQ PE=3 SV=1                                        | 8.5      | 34.9     | 2.70E+06 | 4.20E+06 | 2.40E+06 | 3.90E+06  | 4.90E+06 | 5.50E+06    |  |
| Q87TP8                                     | Glycine-tRNA ligase beta subunit OS=Vibrio parahaemolyticus serotype O3:K6 (strain RIMD 2210633) GN=glyS PE=3 SV=1                                         | 20.1     | 76.2     | 2.90E+06 | 4.30E+06 | 3.80E+06 | 4.60E+06  | 6.00E+06 | 3.90E+06    |  |
| Q87TR0                                     | Amino acid ABC transporter, periplasmic amino acid-binding portion OS=Vibrio parahaemolyticus serotype O3:K6 (strain RIMD 2210633) GN=VP0008 PE=3 SV=1     | 6.0      | 27.5     |          |          | 2.60E+06 |           |          |             |  |
| Q87RF5                                     | Ribosome-recycling factor OS=Vibrio parahaemolyticus serotype O3:K6 (strain RIMD 2210633) GN=fr PE=1 SV=1                                                  | 5.4      | 20.6     | 6.40E+06 | 7.90E+06 | 1.10E+07 | 1.50E+07  | 2.10E+07 | 1.70E+07    |  |
| Q8ALY5                                     | Cyclic AMP receptor protein OS=Vibrio parahaemolyticus serotype O3:K6 (strain RIMD 2210633) GN=VP2793 PE=4 SV=1                                            | 54.8     | 23.7     | 2.30E+07 | 3.20E+07 | 3.20E+07 | 2.70E+07  | 4.40E+07 | 3.20E+07    |  |
| Q8L5X8                                     | BipA OS=Vibrio parahaemolyticus GN=bipA PE=1 SV=1                                                                                                          | 8.9      | 66.9     | 2.60E+06 | 4.40E+06 | 4.70E+06 | 6.00E+06  | 5.80E+06 | 4.70E+06    |  |
| Q8L7P5                                     | 80 kDa chaperonin 1 OS=Vibrio parahaemolyticus serotype O3:K6 (strain RIMD 2210633) GN=grpL1 PE=3 SV=2                                                     | 45.9     | 57.5     | 2.20E+07 | 2.70E+07 | 3.60E+07 | 4.10E+07  | 6.00E+07 | 4.70E+07    |  |
| <b>2nd Experiment (Insoluble Fraction)</b> |                                                                                                                                                            |          |          |          |          |          |           |          |             |  |
| A7UEM1                                     | Transhydrogenase alpha subunit (Fragment) OS=Vibrio parahaemolyticus GN=prtA PE=4 SV=1                                                                     | 7.0      | 15.5     | 1.80E+06 | 5.00E+06 | 2.80E+06 | 4.00E+06  | 2.90E+06 | 4.30E+06    |  |
| A50286                                     | Dihydrodipolyl dehydrogenase OS=Vibrio parahaemolyticus serotype O3:K6 (strain RIMD 2210633) GN=hdp PE=3 SV=2                                              | 15.4     | 51.0     | 2.10E+06 | 6.00E+06 | 2.60E+06 | 3.30E+06  | 4.20E+06 | 2.90E+06    |  |
| POA308                                     | ATP synthase subunit c OS=Vibrio parahaemolyticus serotype O3:K6 (strain RIMD 2210633) GN=atpE PE=3 SV=1                                                   | 21.4     | 8.6      |          |          | 4.70E+06 |           | 2.80E+07 | 2.50E+07    |  |
| P59494                                     | Maltoporin OS=Vibrio parahaemolyticus serotype O3:K6 (strain RIMD 2210633) GN=lamB PE=3 SV=1                                                               | 41.2     | 46.9     | 7.80E+07 | 1.10E+08 | 7.00E+07 | 8.00E+07  | 8.50E+07 | 6.80E+07    |  |
| P59570                                     | Outer membrane protein OmpK OS=Vibrio parahaemolyticus serotype O3:K6 (strain RIMD 2210633) GN=ompK PE=3 SV=1                                              | 20.7     | 29.9     | 6.20E+06 | 1.40E+07 | 6.40E+06 | 9.60E+06  | 8.10E+06 | 7.00E+06    |  |
| P66346                                     | 30S ribosomal protein S10 OS=Vibrio parahaemolyticus serotype O3:K6 (strain RIMD 2210633) GN=rpsJ PE=3 SV=1                                                | 9.7      | 11.7     |          |          |          |           |          |             |  |
| P66478                                     | 30S ribosomal protein S18 OS=Vibrio parahaemolyticus serotype O3:K6 (strain RIMD 2210633) GN=rpsR PE=3 SV=1                                                | 10.7     | 8.8      |          | 2.30E+06 |          |           |          | 1.50E+06    |  |
| Q877T5                                     | Elongation factor Tu OS=Vibrio parahaemolyticus serotype O3:K6 (strain RIMD 2210633) GN=tuafA PE=3 SV=1                                                    | 18.0     | 43.1     | 5.10E+06 | 8.60E+06 |          | 7.10E+06  | 7.90E+06 | 4.30E+06    |  |
| Q87FL2                                     | PTS system, glucose-specific IIBC component OS=Vibrio parahaemolyticus serotype O3:K6 (strain RIMD 2210633) GN=VPA1667 PE=4 SV=1                           | 5.8      | 51.1     |          |          | 5.60E+06 |           | 4.10E+06 | 5.60E+06    |  |
| Q87FM2                                     | Ferric siderophore receptor homolog OS=Vibrio parahaemolyticus serotype O3:K6 (strain RIMD 2210633) GN=VPA1657 PE=3 SV=1                                   | 18.6     | 74.9     | 9.20E+06 | 2.10E+07 | 1.20E+07 | 1.60E+07  | 1.40E+07 | 1.50E+07    |  |
| Q87FM3                                     | Ferric vibrioferrin receptor OS=Vibrio parahaemolyticus serotype O3:K6 (strain RIMD 2210633) GN=VPA1656 PE=3 SV=1                                          | 16.7     | 78.8     | 1.00E+07 | 2.00E+07 | 1.00E+07 | 1.10E+07  | 1.50E+07 | 1.60E+07    |  |
| Q87FN5                                     | Putative maltose operon periplasmic protein OS=Vibrio parahaemolyticus serotype O3:K6 (strain RIMD 2210633) GN=VPA1643 PE=4 SV=1                           | 4.5      | 29.1     |          | 3.80E+06 |          |           |          | 1.70E+06    |  |
| Q87FP0                                     | Putative pullulanase OS=Vibrio parahaemolyticus serotype O3:K6 (strain RIMD 2210633) GN=VPA1638 PE=4 SV=1                                                  | 1.1      | 144.5    | 8.50E+05 |          |          |           |          |             |  |
| Q87G18                                     | L-lactate dehydrogenase OS=Vibrio parahaemolyticus serotype O3:K6 (strain RIMD 2210633) GN=lldD PE=3 SV=1                                                  | 32.7     | 41.4     | 1.10E+07 | 1.90E+07 | 8.80E+06 | 1.20E+07  | 1.00E+07 | 8.30E+06    |  |
| Q87G48                                     | Outer membrane lipoprotein OS=Vibrio parahaemolyticus serotype O3:K6 (strain RIMD 2210633) GN=VPA1469 PE=4 SV=1                                            | 16.7     | 8.7      | 3.90E+06 | 1.40E+07 | 8.00E+06 | 9.40E+06  | 8.80E+06 |             |  |
| Q87G82                                     | Putative iron(III) compound receptor OS=Vibrio parahaemolyticus serotype O3:K6 (strain RIMD 2210633) GN=VPA1435 PE=3 SV=1                                  | 1.6      | 77.0     |          | 8.10E+05 |          |           |          |             |  |
| Q87GB6                                     | Maltose ABC transporter, periplasmic maltose-binding protein OS=Vibrio parahaemolyticus serotype O3:K6 (strain RIMD 2210633) GN=VPA1401 PE=4 SV=1          | 2.6      | 42.1     | 1.50E+06 |          |          | 2.10E+06  |          |             |  |
| Q87G7K                                     | Uncharacterized protein OS=Vibrio parahaemolyticus serotype O3:K6 (strain RIMD 2210633) GN=VPA1308 PE=4 SV=1                                               | 29.5     | 42.3     | 1.80E+07 | 2.70E+07 | 1.30E+07 | 2.30E+07  | 2.00E+07 | 2.00E+07    |  |
| Q87GW2                                     | Uncharacterized protein OS=Vibrio parahaemolyticus serotype O3:K6 (strain RIMD 2210633) GN=VPA1203 PE=4 SV=1                                               | 32.2     | 13.1     | 7.40E+06 | 1.30E+07 | 4.70E+06 | 7.10E+06  | 8.30E+06 | 1.10E+07    |  |
| Q87GW3                                     | Polyhydroxyalkanoic acid synthase OS=Vibrio parahaemolyticus serotype O3:K6 (strain RIMD 2210633) GN=VPA1202 PE=4 SV=1                                     | 1.5      | 67.2     |          | 5.50E+06 |          | 2.90E+06  | 5.20E+06 |             |  |
| Q87GX9                                     | Outer membrane protein OmpA OS=Vibrio parahaemolyticus serotype O3:K6 (strain RIMD 2210633) GN=VPA1186 PE=3 SV=1                                           | 5.2      | 36.0     | 3.40E+06 | 5.20E+06 | 2.50E+06 | 4.30E+06  | 3.70E+06 | 2.90E+06    |  |
| Q87HG0                                     | D-lactate dehydrogenase OS=Vibrio parahaemolyticus serotype O3:K6 (strain RIMD 2210633) GN=VPA1005 PE=4 SV=1                                               | 2.5      | 64.3     |          |          | 4.00E+06 |           |          |             |  |
| Q87H4                                      | Ferric aerobactin receptor OS=Vibrio parahaemolyticus serotype O3:K6 (strain RIMD 2210633) GN=VPA0979 PE=3 SV=1                                            | 5.9      | 79.2     | 2.10E+06 | 4.70E+06 | 3.40E+06 | 3.90E+06  | 3.00E+06 | 4.30E+06    |  |
| Q87HP1                                     | NAD(P) transhydrogenase subunit alpha OS=Vibrio parahaemolyticus serotype O3:K6 (strain RIMD 2210633) GN=VPA0922 PE=3 SV=1                                 | 20.1     | 54.8     | 2.80E+06 | 1.00E+07 | 2.80E+06 | 4.90E+06  | 7.80E+06 | 6.20E+06    |  |
| Q87HP2                                     | NAD(P) transhydrogenase subunit beta OS=Vibrio parahaemolyticus serotype O3:K6 (strain RIMD 2210633) GN=VPA0921 PE=3 SV=1                                  | 2.6      | 48.6     | 3.50E+06 |          |          |           |          |             |  |
| Q87HS4                                     | Heme transport protein Huta OS=Vibrio parahaemolyticus serotype O3:K6 (strain RIMD 2210633) GN=VPA0882 PE=3 SV=1                                           | 20.1     | 77.3     | 6.30E+06 | 1.70E+07 | 1.10E+07 | 1.30E+07  | 1.20E+07 | 1.00E+07    |  |
| Q87J81                                     | Phosphoenolpyruvate synthase OS=Vibrio parahaemolyticus serotype O3:K6 (strain RIMD 2210633) GN=VPA0372 PE=3 SV=1                                          | 2.3      | 88.1     |          | 2.50E+06 |          | 1.80E+06  |          |             |  |
| Q87JD5                                     | Putative outer membrane protein OmpV OS=Vibrio parahaemolyticus serotype O3:K6 (strain RIMD 2210633) GN=VPA0318 PE=4 SV=1                                  | 4.7      | 28.1     | 6.90E+06 | 1.20E+07 | 8.50E+06 | 9.20E+06  | 8.50E+06 | 9.00E+06    |  |
| Q87JT2                                     | Putative outer membrane protein OS=Vibrio parahaemolyticus serotype O3:K6 (strain RIMD 2210633) GN=VPA0166 PE=4 SV=1                                       | 14.0     | 38.0     | 3.30E+07 | 4.00E+07 | 2.90E+07 | 4.00E+07  | 3.00E+07 | 2.70E+07    |  |
| Q87JU6                                     | Biopolymer transport protein ExbB-related protein OS=Vibrio parahaemolyticus serotype O3:K6 (strain RIMD 2210633) GN=VPA0152 PE=3 SV=1                     | 9.2      | 49.2     | 2.30E+06 | 3.80E+06 |          | 3.20E+06  | 3.40E+06 | 3.50E+06    |  |
| Q87K02                                     | Outer membrane protein OmpW OS=Vibrio parahaemolyticus serotype O3:K6 (strain RIMD 2210633) GN=VPA0096 PE=4 SV=1                                           | 6.5      | 23.5     | 1.90E+07 | 1.40E+07 | 7.60E+06 | 9.90E+06  | 1.10E+07 | 7.20E+06    |  |
| Q87KA3                                     | ATP synthase subunit a OS=Vibrio parahaemolyticus serotype O3:K6 (strain RIMD 2210633) GN=atpB PE=3 SV=1                                                   | 3.0      | 30.1     |          |          | 2.10E+06 |           | 1.90E+06 |             |  |
| Q87KA4                                     | ATP synthase subunit b OS=Vibrio parahaemolyticus serotype O3:K6 (strain RIMD 2210633) GN=atpD PE=3 SV=1                                                   | 43.6     | 17.5     | 9.30E+06 | 1.70E+07 | 7.60E+06 | 7.70E+06  | 7.10E+06 | 7.30E+06    |  |
| Q87KA6                                     | ATP synthase subunit alpha OS=Vibrio parahaemolyticus serotype O3:K6 (strain RIMD 2210633) GN=atpA PE=3 SV=1                                               | 17.0     | 56.6     | 5.70E+06 | 7.30E+06 | 3.80E+06 | 5.80E+06  | 6.30E+06 | 7.00E+06    |  |
| Q87KA8                                     | ATP synthase subunit beta OS=Vibrio parahaemolyticus serotype O3:K6 (strain RIMD 2210633) GN=atpD PE=3 SV=1                                                | 23.6     | 50.7     | 2.70E+06 | 6.50E+06 | 2.40E+06 | 2.60E+06  | 4.60E+06 | 3.70E+06    |  |
| Q87KI7                                     | Putative uroporphyrin-III C-methyltransferase OS=Vibrio parahaemolyticus serotype O3:K6 (strain RIMD 2210633) GN=VP2990 PE=4 SV=1                          | 2.5      | 45.1     |          |          |          | 1.50E+06  |          |             |  |
| Q87KN9                                     | Vitamin B12 transporter BtuB OS=Vibrio parahaemolyticus serotype O3:K6 (strain RIMD 2210633) GN=btuB PE=3 SV=1                                             | 1.8      | 69.3     |          |          |          | 2.60E+06  | 1.70E+06 |             |  |
| Q87K00                                     | 50S ribosomal protein L11 OS=Vibrio parahaemolyticus serotype O3:K6 (strain RIMD 2210633) GN=rplK PE=3 SV=1                                                | 21.1     | 14.7     |          | 8.40E+06 |          | 6.00E+06  | 6.80E+06 | 6.00E+06    |  |
| Q87KQ1                                     | 50S ribosomal protein L1 OS=Vibrio parahaemolyticus serotype O3:K6 (strain RIMD 2210633) GN=rplA PE=3 SV=1                                                 | 21.5     | 24.7     | 4.90E+06 | 1.30E+07 | 6.40E+06 | 7.50E+06  | 9.90E+06 | 9.50E+06    |  |
| Q87KQ2                                     | 50S ribosomal protein L10 OS=Vibrio parahaemolyticus serotype O3:K6 (strain RIMD 2210633) GN=rplJ PE=3 SV=1                                                | 13.6     | 17.3     |          | 4.00E+06 |          |           | 3.00E+06 | 2.30E+06    |  |
| Q87KZ2                                     | Fumarate hydratase class II OS=Vibrio parahaemolyticus serotype O3:K6 (strain RIMD 2210633) GN=fumC PE=3 SV=1                                              | 3.9      | 48.7     |          | 1.30E+06 |          | 1.20E+06  |          | 9.40E+05    |  |
| Q87KX4                                     | Uncharacterized protein OS=Vibrio parahaemolyticus serotype O3:K6 (strain RIMD 2210633) GN=VP2850 PE=4 SV=1                                                | 13.6     | 20.2     | 1.30E+06 |          |          | 2.70E+06  |          |             |  |
| Q87L38                                     | Peptidyl-prolyl cis-trans isomerase OS=Vibrio parahaemolyticus serotype O3:K6 (strain RIMD 2210633) GN=VP2778 PE=4 SV=1                                    | 32.7     | 28.3     | 5.30E+06 | 7.20E+06 | 5.20E+06 | 7.90E+06  | 8.40E+06 | 5.30E+06    |  |
| Q87L72                                     | 30S ribosomal protein S6 OS=Vibrio parahaemolyticus serotype O3:K6 (strain RIMD 2210633) GN=rpsF PE=3 SV=1                                                 | 8.5      | 15.0     | 3.20E+06 | 5.90E+06 |          |           |          |             |  |
| Q87L75                                     | 50S ribosomal protein L9 OS=Vibrio parahaemolyticus serotype O3:K6 (strain RIMD 2210633) GN=rplL PE=3 SV=1                                                 | 30.7     | 15.7     | 3.30E+06 | 4.30E+06 | 3.80E+06 | 5.10E+06  | 3.80E+06 | 2.50E+06    |  |
| Q87LB4                                     | Putative V10 pilin OS=Vibrio parahaemolyticus serotype O3:K6 (strain RIMD 2210633) GN=VP2698 PE=4 SV=1                                                     | 32.1     | 16.8     | 2.20E+07 | 3.90E+07 | 2.20E+07 | 2.90E+07  | 2.40E+07 | 2.10E+07    |  |
| Q87LH6                                     | Permease IIC component OS=Vibrio parahaemolyticus serotype O3:K6 (strain RIMD 2210633) GN=VP2636 PE=4 SV=1                                                 | 7.4      | 48.7     |          |          |          |           | 2.00E+07 | 1.50E+07    |  |
| Q87LL3                                     | Uncharacterized protein OS=Vibrio parahaemolyticus serotype O3:K6 (strain RIMD 2210633) GN=VP2598 PE=4 SV=1                                                | 6.6      | 31.0     |          | 3.00E+06 |          |           |          |             |  |
| Q87LQ0                                     | Enolase OS=Vibrio parahaemolyticus serotype O3:K6 (strain RIMD 2210633) GN=eno PE=3 SV=1                                                                   | 8.3      | 45.5     |          | 2.60E+06 |          |           | 2.20E+06 |             |  |
| Q87LR7                                     | Oxaloacetate decarboxylase, alpha subunit OS=Vibrio parahaemolyticus serotype O3:K6 (strain RIMD 2210633) GN=VP2544 PE=4 SV=1                              | 5.5      | 64.2     | 5.50E+06 | 6.10E+06 |          | 6.30E+06  | 7.40E+06 | 4.80E+06    |  |
| Q87LT1                                     | 50S ribosomal protein L19 OS=Vibrio parahaemolyticus serotype O3:K6 (strain RIMD 2210633) GN=rplS PE=3 SV=2                                                | 20.5     | 13.2     |          | 1.00E+07 |          |           | 8.20E+06 | 3.90E+06    |  |
| Q87LU2                                     | Pyruvate dehydrogenase E1 component OS=Vibrio parahaemolyticus serotype O3:K6 (strain RIMD 2210633) GN=VP2519 PE=4 SV=1                                    | 2.4      | 99.6     | 3.20E+06 | 4.80E+06 | 3.30E+06 | 2.70E+06  | 5.00E+06 | 4.50E+06    |  |
| Q87LU3                                     | Acetyltransferase component of pyruvate dehydrogenase complex OS=Vibrio parahaemolyticus serotype O3:K6 (strain RIMD 2210633) GN=VP2518 PE=3 SV=1          | 5.3      | 64.9     | 3.30E+06 | 7.00E+06 | 4.80E+06 | 5.60E+06  | 5.80E+06 | 4.20E+06    |  |
| Q87LZ1                                     | Outer membrane protein U OS=Vibrio parahaemolyticus serotype O3:K6 (strain RIMD 2210633) GN=ompU PE=3 SV=1                                                 | 20.5     | 36.3     | 2.30E+07 | 4.40E+07 | 1.90E+07 | 3.30E+07  | 2.40E+07 | 2.30E+07    |  |
| Q87LZ5                                     | ATP-dependent zinc metalloprotease FtsH OS=Vibrio parahaemolyticus serotype O3:K6 (strain RIMD 2210633) GN=ftsH PE=3 SV=1                                  | 4.8      | 72.9     |          | 4.60E+06 |          | 4.80E+06  | 5.30E+06 |             |  |
| Q87M06                                     | Polyribonucleotide nucleotidyltransferase OS=Vibrio parahaemolyticus serotype O3:K6 (strain RIMD 2210633) GN=ppp PE=3 SV=1                                 | 6.8      | 76.7     | 1.10E+06 | 1.90E+06 |          | 1.30E+06  | 2.00E+06 | 1.60E+06    |  |
| Q87MA6                                     | Na(+)-translocating NADH-quinone reductase subunit A OS=Vibrio parahaemolyticus serotype O3:K6 (strain RIMD 2210633) GN=nqrA PE=3 SV=1                     | 5.4      | 48.6     | 2.90E+06 | 4.40E+06 | 2.60E+06 | 3.10E+06  | 3.70E+06 | 3.40E+06    |  |
| Q87MS0                                     | Uncharacterized protein OS=Vibrio parahaemolyticus serotype O3:K6 (strain RIMD 2210633) GN=VP2161 PE=4 SV=1                                                | 5.1      | 35.2     |          | 1.50E+06 |          |           |          |             |  |
| Q87MS4                                     | Glyceraldehyde-3-phosphate dehydrogenase OS=Vibrio parahaemolyticus serotype O3:K6 (strain RIMD 2210633) GN=VP2157 PE=3 SV=1                               | 8.5      | 35.2     |          |          |          |           | 4.40E+06 | 7.20E+06    |  |
| Q87MW0                                     | Aldehyde-alcohol dehydrogenase OS=Vibrio parahaemolyticus serotype O3:K6 (strain RIMD 2210633) GN=VP2121 PE=1 SV=1                                         | 1.4      | 97.1     |          |          | 1.40E+06 |           |          |             |  |
| Q87MY5                                     | Oligopeptide ABC transporter, periplasmic oligopeptide-binding protein OS=Vibrio parahaemolyticus serotype O3:K6 (strain RIMD 2210633) GN=VP2091 PE=4 SV=1 | 17.1     | 62.3     | 5.70E+06 | 1.60E+07 | 9.50E+06 | 1.10E+07  | 1.20E+07 | 1.10E+07    |  |
| Q87N29                                     | PTS system, glucose-specific IIBC component OS=Vibrio parahaemolyticus serotype O3:K6 (strain RIMD 2210633) GN=VP2046 PE=4 SV=1                            | 13.0     | 49.4     | 1.20E+07 | 1.80E+07 | 1.40E+07 | 1.20E+07  | 1.30E+07 | 1.30E+07    |  |
| Q87N45                                     | 30S ribosomal protein S1 OS=Vibrio parahaemolyticus serotype O3:K6 (strain RIMD 2210633) GN=VP2030 PE=3 SV=1                                               | 9.4      | 60.9     | 3.10E+06 | 5.30E+06 | 1.60E+06 | 3.50E+06  |          |             |  |



Table S1

|         |                                                                                                                                                  |      |      |          |          |          |          |          |          |          |          |
|---------|--------------------------------------------------------------------------------------------------------------------------------------------------|------|------|----------|----------|----------|----------|----------|----------|----------|----------|
| Q87RS1  | Methionine import ATP-binding protein MetN OS=Vibrio parahaemolyticus serotype O3:K6 (strain RIMD 2210633) GN=metN PE=1 SV=1                     | 4.1  | 37.5 |          |          |          |          |          |          | 1.00E+06 |          |
| Q87RS3  | Lipoprotein OS=Vibrio parahaemolyticus serotype O3:K6 (strain RIMD 2210633) GN=VPO704 PE=3 SV=1                                                  | 34.9 | 29.1 | 1.30E+07 | 2.30E+07 | 1.60E+07 | 1.80E+07 | 1.80E+07 | 1.80E+07 | 1.80E+07 | 1.80E+07 |
| Q87RV4  | Uncharacterized protein OS=Vibrio parahaemolyticus serotype O3:K6 (strain RIMD 2210633) GN=VPO672 PE=4 SV=1                                      | 2.8  | 44.8 |          | 1.40E+06 |          |          |          |          |          |          |
| Q87S08  | Inosine-5'-monophosphate dehydrogenase OS=Vibrio parahaemolyticus serotype O3:K6 (strain RIMD 2210633) GN=guaB PE=3 SV=1                         | 2.2  | 51.9 |          | 9.90E+05 |          |          |          |          |          |          |
| Q87S35  | Uncharacterized protein OS=Vibrio parahaemolyticus serotype O3:K6 (strain RIMD 2210633) GN=VPO589 PE=4 SV=1                                      | 11.9 | 11.8 | 5.40E+06 | 9.10E+06 | 4.80E+06 | 6.00E+06 | 6.00E+06 | 6.00E+06 | 5.40E+06 |          |
| Q87S48  | Putative carbon starvation protein A OS=Vibrio parahaemolyticus serotype O3:K6 (strain RIMD 2210633) GN=VPO540 PE=4 SV=1                         | 4.9  | 53.3 | 3.10E+06 | 7.00E+06 | 3.00E+06 | 4.80E+06 | 4.80E+06 | 3.40E+06 | 3.80E+06 |          |
| Q87S4   | 30S ribosomal protein S9 OS=Vibrio parahaemolyticus serotype O3:K6 (strain RIMD 2210633) GN=rpsL PE=3 SV=1                                       | 9.2  | 14.6 | 2.40E+06 | 4.40E+06 | 1.70E+06 | 2.70E+06 | 4.20E+06 | 4.20E+06 | 2.80E+06 |          |
| Q87S15  | 50S ribosomal protein L13 OS=Vibrio parahaemolyticus serotype O3:K6 (strain RIMD 2210633) GN=rplM PE=3 SV=1                                      | 5.6  | 16.0 |          | 8.60E+06 |          |          |          |          | 8.50E+06 |          |
| Q87S78  | Outer membrane protein TolC OS=Vibrio parahaemolyticus serotype O3:K6 (strain RIMD 2210633) GN=VPO425 PE=4 SV=1                                  | 6.8  | 48.0 | 2.30E+06 | 4.20E+06 |          | 2.90E+06 | 2.00E+06 | 2.50E+06 | 2.50E+06 |          |
| Q87S14  | 50S ribosomal protein L21 OS=Vibrio parahaemolyticus serotype O3:K6 (strain RIMD 2210633) GN=rplU PE=3 SV=1                                      | 19.4 | 11.5 | 5.30E+06 | 8.00E+06 | 3.30E+06 | 4.10E+06 | 5.50E+06 | 3.40E+06 | 3.40E+06 |          |
| Q87S7U  | Malate dehydrogenase OS=Vibrio parahaemolyticus serotype O3:K6 (strain RIMD 2210633) GN=mdh PE=3 SV=1                                            | 3.9  | 32.2 |          |          |          | 2.00E+06 |          |          |          |          |
| Q87S70  | Immunogenic protein OS=Vibrio parahaemolyticus serotype O3:K6 (strain RIMD 2210633) GN=VPO323 PE=4 SV=1                                          | 3.4  | 34.5 |          | 2.10E+06 |          |          |          | 1.70E+06 | 2.30E+06 |          |
| Q87S21  | 30S ribosomal protein S4 OS=Vibrio parahaemolyticus serotype O3:K6 (strain RIMD 2210633) GN=rpsD PE=3 SV=1                                       | 20.4 | 23.3 | 3.00E+06 | 4.90E+06 | 1.20E+06 | 2.30E+06 | 3.10E+06 | 3.30E+06 | 3.30E+06 |          |
| Q87S26  | 30S ribosomal protein S5 OS=Vibrio parahaemolyticus serotype O3:K6 (strain RIMD 2210633) GN=rpsE PE=3 SV=1                                       | 10.8 | 17.6 |          | 4.00E+06 |          |          |          |          | 4.10E+06 |          |
| Q87S27  | 50S ribosomal protein L18 OS=Vibrio parahaemolyticus serotype O3:K6 (strain RIMD 2210633) GN=rplR PE=3 SV=1                                      | 14.5 | 12.6 | 1.60E+06 | 4.00E+06 |          | 1.60E+06 | 3.60E+06 | 3.60E+06 | 3.60E+06 |          |
| Q87S28  | 50S ribosomal protein L6 OS=Vibrio parahaemolyticus serotype O3:K6 (strain RIMD 2210633) GN=rplF PE=3 SV=1                                       | 26.0 | 18.8 | 3.90E+06 | 5.80E+06 | 5.40E+06 | 4.50E+06 | 7.60E+06 | 4.60E+06 | 4.60E+06 |          |
| Q87T11  | 50S ribosomal protein L5 OS=Vibrio parahaemolyticus serotype O3:K6 (strain RIMD 2210633) GN=rplE PE=3 SV=1                                       | 25.1 | 20.1 | 1.90E+06 | 5.40E+06 | 2.40E+06 | 7.00E+06 | 7.50E+06 | 3.60E+06 | 3.60E+06 |          |
| Q87T12  | 50S ribosomal protein L4 OS=Vibrio parahaemolyticus serotype O3:K6 (strain RIMD 2210633) GN=rplD PE=3 SV=1                                       | 11.0 | 21.9 | 5.50E+06 |          | 3.50E+06 |          | 8.20E+06 |          |          |          |
| Q87T13  | 50S ribosomal protein L3 OS=Vibrio parahaemolyticus serotype O3:K6 (strain RIMD 2210633) GN=rplC PE=3 SV=1                                       | 13.4 | 22.4 | 5.30E+06 | 1.20E+07 |          |          | 7.50E+06 | 3.50E+06 |          |          |
| Q87T17  | Methyl-accepting chemotaxis protein OS=Vibrio parahaemolyticus serotype O3:K6 (strain RIMD 2210633) GN=VPO183 PE=1 SV=1                          | 2.2  | 60.3 |          |          |          | 1.00E+06 |          |          |          |          |
| Q87T4A  | Putative TolR OS=Vibrio parahaemolyticus serotype O3:K6 (strain RIMD 2210633) GN=VPO166 PE=3 SV=1                                                | 17.4 | 49.3 |          | 6.40E+06 | 2.00E+06 | 3.40E+06 | 3.60E+06 | 4.80E+06 | 4.80E+06 |          |
| Q87T8E  | Glutamine synthetase OS=Vibrio parahaemolyticus serotype O3:K6 (strain RIMD 2210633) GN=VPO121 PE=3 SV=1                                         | 10.2 | 51.5 | 5.70E+06 | 9.80E+06 | 5.00E+06 | 4.20E+06 | 6.50E+06 | 6.90E+06 | 6.90E+06 |          |
| Q87TH1  | Sec-independent protein translocase protein TATA OS=Vibrio parahaemolyticus serotype O3:K6 (strain RIMD 2210633) GN=tatA PE=3 SV=1               | 13.6 | 8.8  |          |          | 4.90E+06 |          |          |          |          |          |
| Q87TM0  | Peptide ABC transporter, permease protein OS=Vibrio parahaemolyticus serotype O3:K6 (strain RIMD 2210633) GN=VPO049 PE=3 SV=1                    | 3.5  | 37.9 | 4.80E+05 | 3.00E+06 |          | 1.90E+06 |          |          |          |          |
| Q87TM1  | Peptide ABC transporter, periplasmic peptide-binding protein OS=Vibrio parahaemolyticus serotype O3:K6 (strain RIMD 2210633) GN=VPO048 PE=4 SV=1 | 2.1  | 57.4 |          | 3.10E+06 | 1.30E+06 |          | 1.30E+06 | 1.40E+06 |          |          |
| Q87TM2  | Peptide ABC transporter, ATP-binding protein OS=Vibrio parahaemolyticus serotype O3:K6 (strain RIMD 2210633) GN=VPO047 PE=3 SV=1                 | 3.9  | 63.7 | 1.00E+07 | 1.80E+06 | 9.30E+05 | 1.20E+06 | 5.60E+06 | 1.00E+06 |          |          |
| Q87TN4  | Ketol-acid reductoisomerase OS=Vibrio parahaemolyticus serotype O3:K6 (strain RIMD 2210633) GN=ivc PE=3 SV=1                                     | 11.5 | 54.7 | 1.70E+06 | 3.50E+06 |          | 1.80E+06 | 2.90E+06 | 2.70E+06 |          |          |
| Q87ALY5 | Cyclic AMP receptor protein OS=Vibrio parahaemolyticus serotype O3:K6 (strain RIMD 2210633) GN=VP2793 PE=4 SV=1                                  | 10.5 | 23.7 | 2.10E+06 | 3.50E+06 |          |          | 2.70E+06 | 4.70E+06 |          |          |
| Q87LP5  | 60 kDa chaperonin 1 OS=Vibrio parahaemolyticus serotype O3:K6 (strain RIMD 2210633) GN=groL1 PE=3 SV=2                                           | 3.7  | 57.5 | 2.20E+06 | 4.10E+06 |          | 3.10E+06 | 3.40E+06 | 3.80E+06 |          |          |
| Q87LCJ0 | Na(+)-translocating NADH-quinone reductase subunit F OS=Vibrio parahaemolyticus serotype O3:K6 (strain RIMD 2210633) GN=nqrF PE=3 SV=2           | 2.9  | 45.1 |          | 4.00E+06 |          |          | 3.60E+06 |          |          |          |

3rd Experiment (Supernatant Fraction)

| Accession | Description                                                                                                                        | Coverage   | MW [kDa] | Control  | GloNAc   | GloN     | (GloNAc)2 | (GloN)2  | GloNAc-GloN |
|-----------|------------------------------------------------------------------------------------------------------------------------------------|------------|----------|----------|----------|----------|-----------|----------|-------------|
| A7UEJ1    | Transhydrogenase alpha subunit (Fragment) OS=Vibrio parahaemolyticus GN=pntA PE=4 SV=1                                             | 6.99300699 | 1.55E+01 | 7.90E+06 | 7.80E+06 |          | 9.40E+06  | 1.00E+07 | 8.20E+06    |
| A7UEQ6    | Dihydro-oxotase (Fragment) OS=Vibrio parahaemolyticus GN=pyrC PE=3 SV=1                                                            | 9.75609756 | 17.809   |          | 6.50E+06 |          |           | 6.10E+06 |             |
| H6BAH9    | Thermolabile hemolysin (Fragment) OS=Vibrio parahaemolyticus GN=tl PE=4 SV=1                                                       | 15         | 1.36E+01 | 4.70E+06 | 4.30E+06 | 1.50E+07 |           | 1.40E+07 | 4.50E+06    |
| OS0286    | Dihydrodipicolyl dehydrogenase OS=Vibrio parahaemolyticus serotype O3:K6 (strain RIMD 2210633) GN=hdp PE=3 SV=2                    | 55.3684211 | 5.10E+01 | 4.00E+07 | 5.00E+07 | 5.00E+07 | 4.30E+07  | 6.10E+07 | 4.90E+07    |
| OB7081    | Polar flagellin F OS=Vibrio parahaemolyticus serotype O3:K6 (strain RIMD 2210633) GN=flaF PE=3 SV=2                                | 5.57029178 | 4.05E+01 | 4.60E+07 | 6.80E+07 | 5.40E+07 | 5.80E+07  | 4.20E+07 | 5.90E+07    |
| POA252    | Acyl carrier protein OS=Vibrio parahaemolyticus serotype O3:K6 (strain RIMD 2210633) GN=sfp PE=3 SV=2                              | 18.1818182 | 8.526    | 1.30E+07 | 1.60E+07 |          |           |          | 7.30E+06    |
| POA308    | ATP synthase subunit c OS=Vibrio parahaemolyticus serotype O3:K6 (strain RIMD 2210633) GN=atpC PE=3 SV=1                           | 8.33333333 | 8.63E+00 | 5.90E+07 |          |          | 3.50E+07  | 7.10E+07 | 5.80E+07    |
| POA481    | 50S ribosomal protein L20 OS=Vibrio parahaemolyticus serotype O3:K6 (strain RIMD 2210633) GN=rplT PE=3 SV=1                        | 15.3846154 | 1.34E+01 | 1.80E+07 | 1.70E+07 | 3.30E+07 | 1.30E+07  | 2.20E+07 | 3.40E+07    |
| P19249    | Thermostable direct hemolysin 1 OS=Vibrio parahaemolyticus serotype O3:K6 (strain RIMD 2210633) GN=tdh1 PE=1 SV=2                  | 29.6296296 | 2.13E+01 | 1.40E+07 | 2.10E+07 | 1.20E+07 | 1.30E+07  | 2.30E+07 | 2.10E+07    |
| P19250    | Thermostable direct hemolysin 2 OS=Vibrio parahaemolyticus serotype O3:K6 (strain RIMD 2210633) GN=tdh2 PE=1 SV=2                  | 41.2698413 | 2.15E+01 | 1.00E+08 | 1.20E+08 | 9.90E+07 | 8.30E+07  | 7.30E+07 | 6.70E+07    |
| P22099    | Anthraxinlike synthase component 1 OS=Vibrio parahaemolyticus serotype O3:K6 (strain RIMD 2210633) GN=trpE PE=3 SV=2               | 2.03327172 | 59.733   | 5.50E+06 |          | 4.00E+06 | 2.90E+06  | 3.10E+06 | 3.90E+06    |
| P22848    | 5'-nucleotidase OS=Vibrio parahaemolyticus serotype O3:K6 (strain RIMD 2210633) GN=nta PE=3 SV=2                                   | 1.24285714 | 6.21E+01 | 1.20E+07 | 1.40E+07 | 1.20E+07 | 9.60E+06  | 1.20E+07 | 1.30E+07    |
| PO4011    | Ribonuclease R OS=Vibrio parahaemolyticus serotype O3:K6 (strain RIMD 2210633) GN=rnr PE=3 SV=2                                    | 2.39520958 | 9.50E+01 |          | 4.70E+07 |          |           |          | 5.60E+07    |
| P59494    | Maltoporin OS=Vibrio parahaemolyticus serotype O3:K6 (strain RIMD 2210633) GN=lamB PE=3 SV=1                                       | 77.7777778 | 4.69E+01 | 1.10E+09 | 1.00E+09 | 9.00E+08 | 8.00E+08  | 8.30E+08 | 6.50E+08    |
| P59562    | UPF0234 protein VP1617 OS=Vibrio parahaemolyticus serotype O3:K6 (strain RIMD 2210633) GN=VP1617 PE=3 SV=1                         | 16.25      | 1.81E+01 |          | 1.30E+06 | 7.00E+06 |           | 5.00E+06 | 6.10E+06    |
| P59570    | Outer membrane protein OmpK OS=Vibrio parahaemolyticus serotype O3:K6 (strain RIMD 2210633) GN=ompK PE=3 SV=1                      | 25.5639098 | 29.857   | 5.70E+07 | 7.80E+07 | 6.30E+07 | 6.40E+07  | 6.50E+07 | 4.60E+07    |
| P59605    | Argininosuccinate synthase OS=Vibrio parahaemolyticus serotype O3:K6 (strain RIMD 2210633) GN=argB PE=3 SV=1                       | 37.3782376 | 4.45E+01 | 3.30E+07 | 4.30E+07 | 3.80E+07 | 2.30E+07  | 4.60E+07 | 3.80E+07    |
| P59620    | Bifunctional protein ArgH OS=Vibrio parahaemolyticus serotype O3:K6 (strain RIMD 2210633) GN=argH PE=3 SV=1                        | 2.72435897 | 6.93E+01 | 5.60E+06 | 6.00E+06 | 5.60E+06 | 4.50E+06  | 7.30E+06 | 8.30E+06    |
| P66478    | 30S ribosomal protein S18 OS=Vibrio parahaemolyticus serotype O3:K6 (strain RIMD 2210633) GN=rpsR PE=3 SV=1                        | 26.8666667 | 8.84E+00 | 9.50E+06 | 1.00E+07 | 8.60E+06 | 1.10E+07  | 2.10E+07 | 1.40E+07    |
| Q56702    | Polar flagellin B/D OS=Vibrio parahaemolyticus serotype O3:K6 (strain RIMD 2210633) GN=flaB PE=3 SV=2                              | 75.9259259 | 4.01E+01 | 5.90E+07 | 1.10E+08 | 6.60E+07 | 9.40E+07  | 6.30E+07 | 6.70E+07    |
| Q56710    | Polar flagellin C OS=Vibrio parahaemolyticus serotype O3:K6 (strain RIMD 2210633) GN=flaC PE=3 SV=1                                | 59.3085106 | 3.98E+01 | 6.50E+07 | 1.20E+08 | 7.50E+07 | 9.80E+07  | 6.60E+07 | 7.00E+07    |
| Q56712    | Polar flagellin A OS=Vibrio parahaemolyticus serotype O3:K6 (strain RIMD 2210633) GN=flaA PE=3 SV=2                                | 50.78125   | 4.08E+01 | 3.80E+07 | 6.60E+07 | 4.90E+07 | 9.90E+07  | 3.90E+07 | 5.20E+07    |
| Q79YX4    | Chemotaxis protein CheW OS=Vibrio parahaemolyticus serotype O3:K6 (strain RIMD 2210633) GN=VP2225 PE=4 SV=1                        | 47.5609758 | 1.84E+01 | 1.60E+07 | 5.00E+07 | 1.10E+07 | 6.40E+06  | 1.40E+07 | 1.00E+07    |
| Q79Y75    | Hook-associated protein type 3 FlgL OS=Vibrio parahaemolyticus serotype O3:K6 (strain RIMD 2210633) GN=VP0788 PE=4 SV=1            | 8.31234257 | 4.50E+01 |          | 2.80E+06 | 1.10E+07 |           |          |             |
| Q79Y78    | Polar flagellin FlgE OS=Vibrio parahaemolyticus serotype O3:K6 (strain RIMD 2210633) GN=VP0778 PE=4 SV=1                           | 33.8384439 | 4.73E+01 | 2.70E+07 | 5.20E+07 | 2.70E+07 | 3.70E+07  | 1.70E+07 | 2.80E+07    |
| Q87T75    | Elongation factor Tu OS=Vibrio parahaemolyticus serotype O3:K6 (strain RIMD 2210633) GN=tuFA PE=3 SV=2                             | 43.1472081 | 4.31E+01 | 7.50E+07 | 1.00E+08 | 6.10E+07 | 4.30E+07  | 8.70E+07 | 6.70E+07    |
| Q87FL7    | Putative diaminoimelate decarboxylase protein OS=Vibrio parahaemolyticus serotype O3:K6 (strain RIMD 2210633) GN=VPA1662 PE=3 SV=1 | 20.5       | 4.53E+01 | 1.30E+07 | 7.20E+06 | 1.10E+07 | 6.00E+06  | 1.50E+07 | 8.60E+06    |
| Q87FM0    | Uncharacterized protein OS=Vibrio parahaemolyticus serotype O3:K6 (strain RIMD 2210633) GN=VPA1659 PE=4 SV=1                       | 34.9180328 | 68.729   | 4.40E+07 | 4.00E+07 | 3.50E+07 | 1.70E+07  | 4.80E+07 | 3.80E+07    |
| Q87FM1    | Uncharacterized protein OS=Vibrio parahaemolyticus serotype O3:K6 (strain RIMD 2210633) GN=VPA1658 PE=4 SV=1                       | 22.5806452 | 44.22    | 1.60E+07 | 1.40E+07 | 1.60E+07 | 7.30E+06  | 2.50E+07 | 1.80E+07    |
| Q87FM2    | Ferric siderophore receptor homolog OS=Vibrio parahaemolyticus serotype O3:K6 (strain RIMD 2210633) GN=VPA1657 PE=3 SV=1           | 61.79941   | 74.942   | 2.60E+08 | 3.00E+08 | 2.60E+08 | 2.30E+08  | 2.10E+08 | 1.60E+08    |
| Q87FM3    | Ferric vibrioferrin receptor OS=Vibrio parahaemolyticus serotype O3:K6 (strain RIMD 2210633) GN=VPA1656 PE=3 SV=1                  | 55.898764  | 78.834   | 1.70E+08 | 2.30E+08 | 1.90E+08 | 1.60E+08  | 1.60E+08 | 1.20E+08    |
| Q87FM9    | Putative zinc protease, insulinsase family OS=Vibrio parahaemolyticus serotype O3:K6 (strain RIMD 2210633) GN=VPA1650 PE=3 SV=1    | 5.24590164 | 102.163  | 3.40E+06 | 5.00E+06 | 3.60E+06 | 5.50E+06  |          | 4.10E+06    |
| Q87FN1    | Uncharacterized protein OS=Vibrio parahaemolyticus serotype O3:K6 (strain RIMD 2210633) GN=VPA1648 PE=4 SV=1                       | 5.91304348 | 62.733   | 6.60E+06 |          | 4.50E+06 |           | 3.90E+06 | 3.50E+06    |
| Q87FN5    | Putative maltose operon periplasmic protein OS=Vibrio parahaemolyticus serotype O3:K6 (strain RIMD 2210633) GN=VPA1643 PE=4 SV=1   | 42.3791822 | 2.91E+01 | 3.30E+07 | 3.90E+07 | 3.40E+07 | 2.60E+07  | 3.00E+07 | 2.50E+07    |
| Q87FN6    | Putative CymC protein OS=Vibrio parahaemolyticus serotype O3:K6 (strain RIMD 2210633) GN=VPA1642 PE=4 SV=1                         | 19.047619  | 18.564   | 1.40E+07 | 9.90E+06 | 8.50E+06 | 7.10E+06  | 1.20E+07 | 1.10E+07    |
| Q87FN7    | Putative maltogenic amylase OS=Vibrio parahaemolyticus serotype O3:K6 (strain RIMD 2210633) GN=VPA1641 PE=4 SV=1                   | 5.59701493 | 5.86E+01 |          |          | 5.20E+06 |           |          |             |
| Q87FP0    | Putative pullulanase OS=Vibrio parahaemolyticus serotype O3:K6 (strain RIMD 2210633) GN=VPA1638 PE=4 SV=1                          | 34.4620015 | 1.44E+02 | 5.10E+07 | 4.80E+07 | 2.80E+07 | 3.30E+07  | 2.70E+07 | 1.80E+07    |
| Q87FQ8    | Alpha-1,4-glucan phosphorylase OS=Vibrio parahaemolyticus serotype O3:K6 (strain RIMD 2210633) GN=VPA1620 PE=3 SV=1                | 35.9853121 | 9.23E+01 | 4.00E+07 | 2.90E+07 | 4.00E+07 | 2.20E+07  | 4.80E+07 | 3.10E+07    |
| Q87FQ9    | 4-alpha-glucanotransferase OS=Vib                                                                                                  |            |          |          |          |          |           |          |             |

Table S1

|        |                                                                                                                                                          |            |          |          |          |          |          |          |          |
|--------|----------------------------------------------------------------------------------------------------------------------------------------------------------|------------|----------|----------|----------|----------|----------|----------|----------|
| Q87HL0 | Putative biofilm-associated surface protein OS=Vibrio parahaemolyticus serotype O3K6 (strain RIMD 2210633) GN=VPA0953 PE=4 SV=1                          | 0.42789902 | 2.47E+02 | 1.50E+07 | 1.60E+07 | 1.50E+07 | 1.60E+07 | 1.50E+07 | 1.20E+07 |
| Q87HM1 | Uncharacterized protein OS=Vibrio parahaemolyticus serotype O3K6 (strain RIMD 2210633) GN=VPA0942 PE=4 SV=1                                              | 4.778157   | 3.30E+06 | 3.30E+06 | 5.60E+06 | 5.40E+06 | 6.60E+06 | 5.80E+06 | 5.80E+06 |
| Q87HM7 | Amino acid biosynthesis aminotransferase OS=Vibrio parahaemolyticus serotype O3K6 (strain RIMD 2210633) GN=VPA0936 PE=4 SV=1                             | 25.1256281 | 43.853   | 1.60E+07 | 1.50E+07 | 1.80E+07 | 6.90E+06 | 2.50E+07 | 1.80E+07 |
| Q87HM8 | Uncharacterized protein OS=Vibrio parahaemolyticus serotype O3K6 (strain RIMD 2210633) GN=VPA0935 PE=4 SV=1                                              | 9.25110132 | 2.57E+01 | 2.80E+06 | 3.30E+06 | 3.40E+06 | 4.00E+06 | 3.10E+06 | 1.20E+06 |
| Q87HM9 | Uncharacterized protein OS=Vibrio parahaemolyticus serotype O3K6 (strain RIMD 2210633) GN=VPA0934 PE=4 SV=1                                              | 3.92156863 | 22.577   | 7.20E+06 | 6.40E+06 |          | 4.50E+06 |          |          |
| Q87HN2 | Molybdenum ABC transporter, periplasmic molybdenum-binding protein OS=Vibrio parahaemolyticus serotype O3K6 (strain RIMD 2210633) GN=VPA0931 PE=4 SV=1   | 9.96015936 | 2.70E+01 |          |          | 1.20E+07 |          |          | 3.70E+06 |
| Q87HP1 | NAD(P) transhydrogenase subunit alpha OS=Vibrio parahaemolyticus serotype O3K6 (strain RIMD 2210633) GN=VPA0922 PE=3 SV=1                                | 14.6718147 | 5.48E+01 | 1.20E+07 | 7.20E+06 |          | 1.40E+07 | 1.80E+07 | 1.30E+07 |
| Q87HP2 | NAD(P) transhydrogenase subunit beta OS=Vibrio parahaemolyticus serotype O3K6 (strain RIMD 2210633) GN=VPA0921 PE=3 SV=1                                 | 10.4803493 | 4.86E+01 | 1.00E+07 | 1.30E+07 | 1.10E+07 | 1.00E+07 | 2.00E+07 | 1.50E+07 |
| Q87HP4 | Transcriptional regulator OS=Vibrio parahaemolyticus serotype O3K6 (strain RIMD 2210633) GN=VPA0919 PE=4 SV=1                                            | 4.54545455 | 2.49E+01 |          |          |          |          |          | 4.50E+06 |
| Q87HP6 | Uncharacterized protein OS=Vibrio parahaemolyticus serotype O3K6 (strain RIMD 2210633) GN=VPA0917 PE=4 SV=1                                              | 2.41286863 | 4.11E+01 |          |          |          |          |          | 5.20E+06 |
| Q87HS4 | Heme transport protein HtaA OS=Vibrio parahaemolyticus serotype O3K6 (strain RIMD 2210633) GN=VPA0882 PE=3 SV=1                                          | 71.1399711 | 7.73E+01 | 2.00E+06 | 2.30E+06 | 2.00E+06 | 1.70E+06 | 1.60E+06 | 1.30E+06 |
| Q87HV6 | UPF0312 protein VPA0850 OS=Vibrio parahaemolyticus serotype O3K6 (strain RIMD 2210633) GN=VPA0850 PE=3 SV=1                                              | 38.6243386 | 20.283   | 6.80E+07 | 8.90E+07 | 7.00E+07 | 4.70E+07 | 3.50E+07 | 5.50E+07 |
| Q87HY4 | Chitodextrinase OS=Vibrio parahaemolyticus serotype O3K6 (strain RIMD 2210633) GN=VPA0832 PE=4 SV=1                                                      | 51.6129032 | 1.12E+02 | 2.30E+06 | 1.10E+07 | 7.60E+07 | 4.20E+07 | 3.90E+06 | 3.90E+06 |
| Q87HY6 | Amino acid ABC transporter, periplasmic amino acid-binding protein OS=Vibrio parahaemolyticus serotype O3K6 (strain RIMD 2210633) GN=VPA0820 PE=4 SV=1   | 5.86080586 | 3.06E+01 | 1.50E+07 | 1.40E+07 | 1.50E+07 | 1.10E+07 | 1.30E+07 | 1.60E+07 |
| Q87HZ6 | Uncharacterized protein OS=Vibrio parahaemolyticus serotype O3K6 (strain RIMD 2210633) GN=VPA0810 PE=4 SV=1                                              | 24.8073298 | 21.082   | 1.30E+07 | 2.20E+07 | 1.70E+07 | 1.50E+07 | 1.20E+07 | 1.00E+07 |
| Q87J03 | Serine hydroxymethyltransferase 2 OS=Vibrio parahaemolyticus serotype O3K6 (strain RIMD 2210633) GN=glyA2 PE=3 SV=1                                      | 5.10440835 | 46.478   | 5.80E+06 |          |          |          |          | 2.50E+06 |
| Q87J05 | Glycine dehydrogenase (decarboxylating) OS=Vibrio parahaemolyticus serotype O3K6 (strain RIMD 2210633) GN=gcvp PE=3 SV=1                                 | 4.82180294 | 1.04E+02 | 6.00E+06 |          | 1.10E+07 |          | 9.00E+06 | 4.00E+06 |
| Q87J10 | Putative L-allo-threonine aldolase OS=Vibrio parahaemolyticus serotype O3K6 (strain RIMD 2210633) GN=VPA0796 PE=4 SV=1                                   | 2.79329609 | 4.09E+01 |          |          |          | 4.00E+06 |          |          |
| Q87J38 | Catalase-peroxidase 2 OS=Vibrio parahaemolyticus serotype O3K6 (strain RIMD 2210633) GN=katG2 PE=3 SV=1                                                  | 1.65745856 | 80.653   | 2.10E+07 | 2.20E+07 |          | 2.50E+07 |          |          |
| Q87J39 | Methylglyoxal synthase OS=Vibrio parahaemolyticus serotype O3K6 (strain RIMD 2210633) GN=mgsA PE=3 SV=1                                                  | 29.1390728 | 1.70E+01 | 2.70E+07 | 8.50E+06 | 7.70E+06 | 6.40E+06 |          |          |
| Q87JF2 | Putative Fe-regulated protein B OS=Vibrio parahaemolyticus serotype O3K6 (strain RIMD 2210633) GN=VPA0664 PE=3 SV=1                                      | 26.3473054 | 3.00E+07 | 3.00E+07 | 3.50E+07 | 3.10E+07 | 2.90E+07 | 2.50E+07 | 2.20E+07 |
| Q87JF9 | Iron(III) ABC transporter, periplasmic iron-compound-binding protein OS=Vibrio parahaemolyticus serotype O3K6 (strain RIMD 2210633) GN=VPA0657 PE=4 SV=1 | 39.0728477 | 3.35E+01 | 4.80E+07 | 3.00E+07 | 4.70E+07 | 3.10E+07 | 4.70E+07 | 3.30E+07 |
| Q87JG5 | Putative transcriptional regulator, LysR family OS=Vibrio parahaemolyticus serotype O3K6 (strain RIMD 2210633) GN=VPA0641 PE=4 SV=1                      | 2.88808664 | 3.07E+01 |          |          |          |          |          |          |
| Q87JG9 | Arginine ABC transporter, periplasmic arginine-binding protein OS=Vibrio parahaemolyticus serotype O3K6 (strain RIMD 2210633) GN=VPA0637 PE=3 SV=1       | 52.2267206 | 2.73E+01 | 4.50E+07 | 5.80E+07 | 3.40E+07 | 2.70E+07 | 3.20E+07 | 3.60E+07 |
| Q87JL5 | Acetate kinase 2 OS=Vibrio parahaemolyticus serotype O3K6 (strain RIMD 2210633) GN=ackA2 PE=3 SV=1                                                       | 32.4937028 | 4.26E+01 | 4.30E+07 | 4.30E+07 | 5.60E+07 | 3.10E+07 | 5.00E+07 | 4.30E+07 |
| Q87JP0 | Alcohol dehydrogenase OS=Vibrio parahaemolyticus serotype O3K6 (strain RIMD 2210633) GN=VPA0566 PE=4 SV=1                                                | 2.35602094 | 4.02E+01 | 3.80E+07 |          |          |          |          |          |
| Q87JP4 | Putative chemotaxis transducer OS=Vibrio parahaemolyticus serotype O3K6 (strain RIMD 2210633) GN=VPA0562 PE=4 SV=1                                       | 0.88235294 | 7.39E+01 | 2.50E+07 |          | 3.20E+07 | 2.50E+07 | 4.80E+07 | 3.60E+07 |
| Q87JQ0 | Gyrase family protein OS=Vibrio parahaemolyticus serotype O3K6 (strain RIMD 2210633) GN=VPA0556 PE=4 SV=1                                                | 1.25       | 5.42E+01 |          |          |          |          |          |          |
| Q87J51 | Putative phosphomannomutase OS=Vibrio parahaemolyticus serotype O3K6 (strain RIMD 2210633) GN=VPA0535 PE=3 SV=1                                          | 49.1134752 | 6.16E+01 | 4.70E+07 | 5.10E+07 | 5.30E+07 | 4.00E+07 | 5.40E+07 | 4.30E+07 |
| Q87J59 | Outer membrane protein N, non-specific porin OS=Vibrio parahaemolyticus serotype O3K6 (strain RIMD 2210633) GN=VPA0527 PE=4 SV=1                         | 4.29799427 | 3.78E+01 |          | 5.00E+06 | 4.90E+06 |          |          |          |
| Q87J72 | Spermidine n1-acetyltransferase OS=Vibrio parahaemolyticus serotype O3K6 (strain RIMD 2210633) GN=VPA0474 PE=4 SV=1                                      | 15.3409091 | 2.11E+01 |          |          |          |          | 3.80E+06 | 1.90E+06 |
| Q87J78 | Prolyl endopeptidase OS=Vibrio parahaemolyticus serotype O3K6 (strain RIMD 2210633) GN=VPA0468 PE=4 SV=1                                                 | 4.24403183 | 8.42E+01 | 3.70E+06 | 4.70E+06 | 6.10E+06 | 3.20E+06 | 3.60E+06 |          |
| Q87J20 | Catalase-peroxidase 1 OS=Vibrio parahaemolyticus serotype O3K6 (strain RIMD 2210633) GN=katG1 PE=3 SV=1                                                  | 1.66435506 | 80.435   | 2.10E+07 | 2.20E+07 |          |          |          |          |
| Q87J24 | Uncharacterized protein OS=Vibrio parahaemolyticus serotype O3K6 (strain RIMD 2210633) GN=VPA0429 PE=4 SV=1                                              | 6.81818182 | 2.02E+01 | 4.40E+06 | 7.70E+06 | 8.70E+06 | 3.50E+06 | 9.70E+06 | 9.60E+06 |
| Q87J25 | Uncharacterized protein OS=Vibrio parahaemolyticus serotype O3K6 (strain RIMD 2210633) GN=VPA0428 PE=4 SV=1                                              | 9.94152047 | 1.91E+01 |          |          |          |          |          |          |
| Q87J30 | Hemin ABC transporter, periplasmic hemin-binding protein HtaB OS=Vibrio parahaemolyticus serotype O3K6 (strain RIMD 2210633) GN=VPA0423 PE=4 SV=1        | 10.0346021 | 3.03E+01 | 5.50E+06 |          | 4.50E+06 | 3.30E+06 | 4.80E+06 | 4.20E+06 |
| Q87J46 | Dihydrodipicolinate OS=Vibrio parahaemolyticus serotype O3K6 (strain RIMD 2210633) GN=pyrC PE=3 SV=1                                                     | 4.67836257 | 37.805   |          | 6.50E+06 |          |          | 6.10E+06 |          |
| Q87J78 | Adenylosuccinate synthetase OS=Vibrio parahaemolyticus serotype O3K6 (strain RIMD 2210633) GN=psuA PE=3 SV=1                                             | 5.26315789 | 4.56E+01 | 2.40E+07 | 3.00E+07 | 7.40E+06 | 4.10E+07 | 2.30E+07 |          |
| Q87J81 | Phosphoenolpyruvate synthase OS=Vibrio parahaemolyticus serotype O3K6 (strain RIMD 2210633) GN=VPA0372 PE=3 SV=1                                         | 46.163522  | 8.81E+01 | 6.70E+07 | 6.40E+07 | 6.00E+07 | 3.90E+07 | 7.00E+07 | 5.10E+07 |
| Q87J86 | Putrescine-binding periplasmic protein OS=Vibrio parahaemolyticus serotype O3K6 (strain RIMD 2210633) GN=VPA0367 PE=3 SV=1                               | 50.2906977 | 38.671   | 1.10E+06 | 1.30E+06 | 1.20E+06 | 9.30E+07 | 1.10E+06 | 9.90E+07 |
| Q87J05 | Putative outer membrane protein OmpO OS=Vibrio parahaemolyticus serotype O3K6 (strain RIMD 2210633) GN=VPA0318 PE=4 SV=1                                 | 40.3100775 | 2.81E+01 | 4.90E+07 | 6.10E+07 | 5.70E+07 | 4.90E+07 | 4.80E+07 | 3.70E+07 |
| Q87JF1 | Uncharacterized protein OS=Vibrio parahaemolyticus serotype O3K6 (strain RIMD 2210633) GN=VPA0302 PE=4 SV=1                                              | 6.97674419 | 14.722   |          |          |          |          |          | 3.90E+06 |
| Q87JG6 | 60 kDa chaperonin 2 OS=Vibrio parahaemolyticus serotype O3K6 (strain RIMD 2210633) GN=groL PE=3 SV=1                                                     | 9.58646617 | 5.63E+01 | 1.40E+07 | 8.60E+06 | 1.50E+07 | 8.10E+06 | 4.40E+06 | 9.80E+06 |
| Q87JK3 | Uncharacterized protein OS=Vibrio parahaemolyticus serotype O3K6 (strain RIMD 2210633) GN=VPA0246 PE=4 SV=1                                              | 2.5        | 4.56E+01 |          |          | 5.70E+06 |          | 5.70E+06 |          |
| Q87JM2 | Alkaline serine protease OS=Vibrio parahaemolyticus serotype O3K6 (strain RIMD 2210633) GN=VPA0227 PE=4 SV=1                                             | 23.7813885 | 7.10E+01 | 7.50E+07 | 1.10E+08 | 8.00E+07 | 7.30E+07 | 4.60E+07 | 3.10E+07 |
| Q87JM9 | Uncharacterized protein OS=Vibrio parahaemolyticus serotype O3K6 (strain RIMD 2210633) GN=VPA0219 PE=4 SV=1                                              | 6.94444444 | 15.574   |          |          |          |          |          |          |
| Q87J89 | Phospho-beta-glucosidase B OS=Vibrio parahaemolyticus serotype O3K6 (strain RIMD 2210633) GN=VPA0180 PE=3 SV=1                                           | 14.9208078 | 52.96    | 1.60E+07 | 1.90E+07 | 1.20E+07 | 1.20E+07 | 7.70E+06 | 1.10E+07 |
| Q87J59 | Agmatinase OS=Vibrio parahaemolyticus serotype O3K6 (strain RIMD 2210633) GN=VPA0169 PE=3 SV=1                                                           | 12.745098  | 3.34E+01 | 1.10E+07 | 1.30E+07 | 1.20E+07 | 1.20E+07 | 1.50E+07 |          |
| Q87J71 | Putative protease OS=Vibrio parahaemolyticus serotype O3K6 (strain RIMD 2210633) GN=VPA0167 PE=4 SV=1                                                    | 1.52568881 | 8.21E+01 |          |          | 5.90E+06 |          | 6.50E+06 |          |
| Q87J72 | Putative outer membrane protein OmpO OS=Vibrio parahaemolyticus serotype O3K6 (strain RIMD 2210633) GN=VPA0166 PE=4 SV=1                                 | 23.2091691 | 37.95    | 8.80E+08 | 9.60E+08 | 7.20E+08 | 6.90E+08 | 5.80E+08 | 4.80E+08 |
| Q87JU6 | Biopolymer transport protein ExbB-related protein OS=Vibrio parahaemolyticus serotype O3K6 (strain RIMD 2210633) GN=VPA0152 PE=3 SV=1                    | 3.07692308 | 4.92E+01 |          |          |          |          | 4.20E+06 |          |
| Q87JY4 | D-lactate dehydrogenase OS=Vibrio parahaemolyticus serotype O3K6 (strain RIMD 2210633) GN=VPA0144 PE=3 SV=1                                              | 12.3687069 | 3.67E+01 | 8.10E+06 | 8.20E+06 | 9.50E+06 |          |          | 1.70E+07 |
| Q87JY9 | Putative PmbA-related protein OS=Vibrio parahaemolyticus serotype O3K6 (strain RIMD 2210633) GN=VPA0139 PE=4 SV=1                                        | 5.14541387 | 4.77E+01 | 6.00E+06 | 7.70E+06 | 6.00E+06 | 6.00E+06 | 7.50E+06 | 5.40E+06 |
| Q87JW6 | Putative transcriptional activator OS=Vibrio parahaemolyticus serotype O3K6 (strain RIMD 2210633) GN=VPA0132 PE=4 SV=1                                   | 13.1818182 | 2.49E+01 | 2.10E+07 | 2.00E+07 | 2.20E+07 | 1.10E+07 | 1.60E+07 | 1.20E+07 |
| Q87JW7 | Hydroxyethylthiazole kinase OS=Vibrio parahaemolyticus serotype O3K6 (strain RIMD 2210633) GN=thiM PE=3 SV=1                                             | 7.60456274 | 2.77E+01 | 3.90E+06 |          |          |          |          |          |
| Q87JY6 | Putative peptidase OS=Vibrio parahaemolyticus serotype O3K6 (strain RIMD 2210633) GN=VPA0112 PE=3 SV=1                                                   | 2.27642276 | 6.94E+01 |          |          |          |          |          |          |
| Q87JZ2 | Uncharacterized protein OS=Vibrio parahaemolyticus serotype O3K6 (strain RIMD 2210633) GN=VPA0106 PE=1 SV=1                                              | 4.36781609 | 49.13    |          |          | 5.20E+06 |          |          |          |
| Q87K02 | Outer membrane protein OmpW OS=Vibrio parahaemolyticus serotype O3K6 (strain RIMD 2210633) GN=VPA0096 PE=4 SV=1                                          | 26.1682243 | 2.35E+01 | 1.40E+08 | 1.00E+08 | 1.30E+08 | 2.80E+07 | 1.10E+08 | 4.60E+07 |
| Q87K06 | Spindolin-related protein OS=Vibrio parahaemolyticus serotype O3K6 (strain RIMD 2210633) GN=VPA0092 PE=3 SV=1                                            | 37.244898  | 4.35E+01 | 2.00E+07 | 2.00E+07 | 1.40E+07 | 2.10E+07 | 5.40E+07 | 1.10E+08 |
| Q87K09 | Putative siderophore utilization protein OS=Vibrio parahaemolyticus serotype O3K6 (strain RIMD 2210633) GN=VPA0089 PE=4 SV=1                             | 10.1167315 | 2.90E+01 |          |          | 6.90E+06 |          |          |          |
| Q87K14 | UPF0345 protein VPA0057 OS=Vibrio parahaemolyticus serotype O3K6 (strain RIMD 2210633) GN=VPA0057 PE=1 SV=1                                              | 10.6382979 | 10.206   |          |          |          |          |          |          |
| Q87K43 | Chitinase OS=Vibrio parahaemolyticus serotype O3K6 (strain RIMD 2210633) GN=VPA0055 PE=3 SV=1                                                            | 59.4339623 | 9.00E+01 | 1.30E+07 | 2.20E+07 | 1.50E+08 | 1.40E+08 | 7.10E+08 | 1.10E+09 |
| Q87K58 | Uncharacterized protein OS=Vibrio parahaemolyticus serotype O3K6 (strain RIMD 2210633) GN=VPA0040 PE=4 SV=1                                              | 10.2564103 | 13.483   | 1.40E+07 | 1.10E+07 |          |          | 1.90E+07 | 1.50E+07 |
| Q87K60 | Glucosamine-6-phosphate deaminase OS=Vibrio parahaemolyticus serotype O3K6 (strain RIMD 2210633) GN=mgB PE=3 SV=1                                        | 49.8240602 | 29.639   | 9.60E+06 | 8.60E+07 | 2.60E+07 | 8.00E+07 | 2.30E+07 | 4.40E+07 |
| Q87K83 | ATP synthase subunit a OS=Vibrio parahaemolyticus serotype O3K6 (strain RIMD 2210633) GN=atpB PE=3 SV=1                                                  | 5.81518519 | 3.01E+01 | 4.80E+06 | 3.60E+06 | 3.30E+06 | 2.90E+06 | 3.40E+06 |          |
| Q87K84 | ATP synthase subunit b OS=Vibrio parahaemolyticus serotype O3K6 (strain RIMD 2210633) GN=atpF PE=3 SV=1                                                  | 41.025641  | 17.549   | 1.10E+07 | 1.40E+07 |          |          | 1.40E+07 | 1.20E+07 |
| Q87K86 | ATP synthase subunit alpha OS=Vibrio parahaemolyticus serotype O3K6 (strain RIMD 2210633) GN=atpA PE=3 SV=1                                              | 49.1395793 | 5.66E+01 | 3.10E+07 | 3.70E+07 | 2.50E+07 | 3.00E+07 | 3.90E+07 | 3.50E+07 |
| Q87K87 | ATP synthase gamma chain OS=Vibrio parahaemolyticus serotype O3K6 (strain RIMD 2210633) GN=atpG PE=3 SV=1                                                | 10.7638889 | 3.18E+01 |          |          | 1.10E+07 | 1.20E+07 | 1.20E+07 | 3.60E+06 |
| Q87K88 | ATP synthase subunit beta OS=Vibrio parahaemolyticus serotype O3K6 (strain RIMD 2210633) GN=atpD PE=3 SV=1                                               | 31.9057816 | 5.07E+01 | 2.50E+07 | 2.60E+07 | 1.80E+07 | 2.20E+07 | 2.30E+07 | 2.50E+07 |
| Q87K86 | Dihydroxy-acid dehydratase OS=Vibrio parahaemolyticus serotype O3K6 (strain RIMD 2210633) GN=hdv PE=3 SV=1                                               | 31.9739889 | 6.56E+01 | 2.30E+07 | 3.10E+07 | 2.10E+07 | 1.20E+07 | 2.00E+07 | 1.80E+07 |
| Q87KB7 | Branched-chain amino acid aminotransferase OS=Vibrio parahaemolyticus serotype O3K6 (strain RIMD 2210633) GN=VP3060 PE=3 SV=1                            | 27.2435897 | 3.43E+01 | 4.30E+07 | 4.70E+07 | 4.80E+07 | 3.50E+07 | 4.40E+07 | 4.40E+07 |
| Q87KC1 | Putative periplasmic protein OS=Vibrio parahaemolyticus serotype O                                                                                       |            |          |          |          |          |          |          |          |



|          |                                                                                                                                                          |             |          |          |          |          |          |  |          |          |
|----------|----------------------------------------------------------------------------------------------------------------------------------------------------------|-------------|----------|----------|----------|----------|----------|--|----------|----------|
| Q87L18   | Extracellular nuclease-related protein OS=Vibrio parahaemolyticus serotype O3:K6 (strain RIMD 2210633) GN=VP2799 PE=4 SV=1                               | 9.04471545  | 1.06E+02 | 1.40E+07 | 1.40E+07 | 1.20E+07 | 1.10E+07 |  |          | 6.00E+06 |
| Q87L20   | Acetylornithine aminotransferase OS=Vibrio parahaemolyticus serotype O3:K6 (strain RIMD 2210633) GN=argD PE=3 SV=1                                       | 34.73945451 | 4.33E+01 | 2.30E+07 | 2.40E+07 | 2.30E+07 | 1.90E+07 |  |          | 2.10E+07 |
| Q87L23   | Uncharacterized protein OS=Vibrio parahaemolyticus serotype O3:K6 (strain RIMD 2210633) GN=VP2794 PE=4 SV=1                                              | 37.64245856 | 2.92E+01 | 3.10E+07 | 4.00E+07 | 1.90E+07 | 1.90E+07 |  |          | 2.10E+07 |
| Q87L24   | Phosphoribulokinase OS=Vibrio parahaemolyticus serotype O3:K6 (strain RIMD 2210633) GN=VP2792 PE=4 SV=1                                                  | 4.4892699   | 32.737   | 8.70E+06 | 8.00E+06 |          |          |  | 5.60E+06 | 1.10E+07 |
| Q87L37   | Uncharacterized protein OS=Vibrio parahaemolyticus serotype O3:K6 (strain RIMD 2210633) GN=VP2779 PE=4 SV=1                                              | 6.40243902  | 3.65E+01 |          |          |          |          |  |          | 1.10E+06 |
| Q87L38   | Peptidyl-prolyl cis-trans isomerase OS=Vibrio parahaemolyticus serotype O3:K6 (strain RIMD 2210633) GN=VP2778 PE=4 SV=1                                  | 20.3789231  | 2.83E+01 | 8.10E+06 | 6.40E+06 | 3.50E+06 | 5.30E+06 |  | 8.70E+06 | 1.10E+07 |
| Q87L44   | 30S ribosomal protein S7 OS=Vibrio parahaemolyticus serotype O3:K6 (strain RIMD 2210633) GN=rpsG PE=3 SV=1                                               | 40.3846154  | 1.77E+01 | 2.70E+07 | 2.80E+07 | 3.40E+07 | 2.10E+07 |  | 5.20E+07 | 4.10E+07 |
| Q87L45   | Elongation factor G 1 OS=Vibrio parahaemolyticus serotype O3:K6 (strain RIMD 2210633) GN=efuA1 PE=3 SV=1                                                 | 21.0300429  | 7.75E+01 | 1.60E+07 | 1.70E+07 | 2.10E+07 | 1.10E+07 |  | 2.00E+07 | 1.60E+07 |
| Q87L48   | Putative malate oxidoreductase OS=Vibrio parahaemolyticus serotype O3:K6 (strain RIMD 2210633) GN=VP2787 PE=3 SV=1                                       | 21.6470588  | 46.135   | 1.90E+07 | 1.90E+07 | 1.60E+07 | 1.10E+07 |  | 1.50E+07 | 1.20E+07 |
| Q87L50   | Cystathionine gamma-synthase OS=Vibrio parahaemolyticus serotype O3:K6 (strain RIMD 2210633) GN=VP2785 PE=3 SV=1                                         | 18.9119171  | 4.18E+01 | 2.30E+07 | 2.50E+07 | 2.80E+07 | 2.00E+07 |  | 2.80E+07 | 2.50E+07 |
| Q87L55   | N-acetyl-gamma-glutamyl-phosphate reductase OS=Vibrio parahaemolyticus serotype O3:K6 (strain RIMD 2210633) GN=argC PE=3 SV=1                            | 31.7365269  | 36.154   | 1.40E+07 | 1.30E+07 | 1.70E+07 | 9.50E+06 |  | 1.20E+07 | 1.50E+07 |
| Q87L71   | Ribulose-phosphate 3-epimerase OS=Vibrio parahaemolyticus serotype O3:K6 (strain RIMD 2210633) GN=VP2741 PE=3 SV=1                                       | 3.13901345  | 2.44E+01 | 6.10E+06 | 7.20E+06 |          |          |  |          |          |
| Q87L72   | 30S ribosomal protein S6 OS=Vibrio parahaemolyticus serotype O3:K6 (strain RIMD 2210633) GN=rpsF PE=3 SV=1                                               | 8.52713178  | 14.974   | 4.10E+06 | 5.20E+06 |          |          |  | 4.60E+06 | 8.10E+06 |
| Q87L75   | 50S ribosomal protein L9 OS=Vibrio parahaemolyticus serotype O3:K6 (strain RIMD 2210633) GN=rplL PE=3 SV=1                                               | 7.33333333  | 1.57E+01 |          |          |          |          |  |          | 5.20E+06 |
| Q87L81   | Glucose-6-phosphate isomerase OS=Vibrio parahaemolyticus serotype O3:K6 (strain RIMD 2210633) GN=pgi PE=3 SV=1                                           | 50.1818182  | 6.09E+01 | 9.40E+07 | 8.30E+07 | 1.20E+08 | 6.80E+07 |  | 1.20E+08 | 1.00E+08 |
| Q87L90   | Sulfite reductase [NADPH] flavoprotein alpha-component OS=Vibrio parahaemolyticus serotype O3:K6 (strain RIMD 2210633) GN=cysJ PE=3 SV=1                 | 11.5569823  | 6.87E+01 | 8.10E+06 | 1.40E+07 | 9.80E+06 | 9.10E+06 |  | 1.20E+07 | 1.10E+07 |
| Q87L91   | Sulfite reductase [NADPH] hemoprotein beta-component OS=Vibrio parahaemolyticus serotype O3:K6 (strain RIMD 2210633) GN=cysI PE=3 SV=1                   | 6.05536332  | 6.48E+01 | 6.70E+06 | 7.30E+06 | 7.80E+06 | 5.10E+06 |  | 9.60E+06 | 6.60E+06 |
| Q87L98   | Aminotransferase, class V OS=Vibrio parahaemolyticus serotype O3:K6 (strain RIMD 2210633) GN=VP2714 PE=3 SV=1                                            | 6.97050938  | 4.08E+01 | 7.20E+06 |          | 1.20E+07 |          |  |          |          |
| Q87LA3   | Single-stranded DNA-binding protein OS=Vibrio parahaemolyticus serotype O3:K6 (strain RIMD 2210633) GN=ssb PE=3 SV=1                                     | 19.95454545 | 19.551   | 1.10E+07 | 1.30E+07 |          | 7.70E+06 |  |          | 1.40E+07 |
| Q87LB4   | Putative V10 pilin OS=Vibrio parahaemolyticus serotype O3:K6 (strain RIMD 2210633) GN=VP2698 PE=4 SV=1                                                   | 36.3636364  | 1.68E+01 | 1.70E+07 | 2.30E+07 | 2.00E+07 | 1.80E+07 |  | 2.40E+07 | 2.60E+07 |
| Q87LC0   | Uncharacterized protein OS=Vibrio parahaemolyticus serotype O3:K6 (strain RIMD 2210633) GN=VP2692 PE=4 SV=1                                              | 0.89470662  | 1.59E+02 | 2.60E+06 |          |          |          |  |          |          |
| Q87LE1   | Putative sigma-54 modulation protein OS=Vibrio parahaemolyticus serotype O3:K6 (strain RIMD 2210633) GN=VP2671 PE=4 SV=1                                 | 13.6842105  | 1.10E+01 |          | 1.80E+07 |          |          |  |          |          |
| Q87LF1   | Uncharacterized protein OS=Vibrio parahaemolyticus serotype O3:K6 (strain RIMD 2210633) GN=VP2661 PE=4 SV=1                                              | 8.96226415  | 2.41E+01 |          |          | 1.30E+07 |          |  |          | 8.10E+06 |
| Q87LF6   | Uncharacterized protein OS=Vibrio parahaemolyticus serotype O3:K6 (strain RIMD 2210633) GN=VP2656 PE=4 SV=1                                              | 12.4031008  | 13.792   | 8.60E+06 | 1.10E+07 |          |          |  |          | 6.80E+06 |
| Q87LF7   | Aspartate carbamoyltransferase regulatory chain OS=Vibrio parahaemolyticus serotype O3:K6 (strain RIMD 2210633) GN=pyrI PE=3 SV=1                        | 5.22875817  | 1.74E+01 |          |          |          | 5.80E+06 |  |          |          |
| Q87LF8   | Aspartate carbamoyltransferase OS=Vibrio parahaemolyticus serotype O3:K6 (strain RIMD 2210633) GN=pyrB PE=3 SV=1                                         | 13.592233   | 34.474   |          |          | 5.50E+06 |          |  | 2.40E+06 |          |
| Q87LF9   | Ornithine carbamoyltransferase OS=Vibrio parahaemolyticus serotype O3:K6 (strain RIMD 2210633) GN=argF PE=3 SV=1                                         | 47.90419116 | 3.73E+01 | 6.20E+07 | 5.60E+07 | 6.50E+07 | 5.60E+07 |  | 7.50E+07 | 6.20E+07 |
| Q87LG6   | Valine-tRNA ligase OS=Vibrio parahaemolyticus serotype O3:K6 (strain RIMD 2210633) GN=valS PE=3 SV=1                                                     | 0.94537815  | 1.09E+02 |          |          |          |          |  |          |          |
| Q87LG8   | Probable cytosol aminopeptidase OS=Vibrio parahaemolyticus serotype O3:K6 (strain RIMD 2210633) GN=pepA PE=3 SV=1                                        | 6.57370518  | 5.44E+01 | 5.30E+06 | 3.20E+06 |          | 3.60E+06 |  | 9.20E+06 | 5.50E+06 |
| Q87LH4   | Deacetylase DA1 OS=Vibrio parahaemolyticus serotype O3:K6 (strain RIMD 2210633) GN=VP2638 PE=4 SV=1                                                      | 36.7681499  | 4.70E+01 | 4.20E+07 | 6.20E+07 | 8.70E+07 | 5.20E+08 |  | 3.40E+08 | 2.10E+08 |
| Q87LH6   | Permease IIC component OS=Vibrio parahaemolyticus serotype O3:K6 (strain RIMD 2210633) GN=VP2636 PE=4 SV=1                                               | 9.84430045  | 4.87E+01 |          |          |          |          |  |          | 1.90E+07 |
| Q87LK8   | Transketolase 1 OS=Vibrio parahaemolyticus serotype O3:K6 (strain RIMD 2210633) GN=ttk1 PE=3 SV=1                                                        | 7.22891566  | 7.20E+01 | 1.10E+07 |          | 1.50E+07 | 6.60E+06 |  | 1.40E+07 | 1.10E+07 |
| Q87LL1   | Phosphoglycerate kinase OS=Vibrio parahaemolyticus serotype O3:K6 (strain RIMD 2210633) GN=pgk PE=3 SV=1                                                 | 22.0207254  | 40.707   | 1.80E+07 | 1.30E+07 | 1.30E+07 | 1.20E+07 |  | 1.10E+07 | 9.10E+06 |
| Q87LL2   | Fructose-bisphosphate aldolase, class II OS=Vibrio parahaemolyticus serotype O3:K6 (strain RIMD 2210633) GN=VP2599 PE=4 SV=1                             | 68.4357542  | 3.89E+01 | 2.30E+08 | 2.70E+08 | 3.00E+08 | 2.30E+08 |  | 2.50E+08 | 2.60E+08 |
| Q87LL8   | D-3-phosphoglycerate dehydrogenase OS=Vibrio parahaemolyticus serotype O3:K6 (strain RIMD 2210633) GN=VP2583 PE=3 SV=1                                   | 29.7560976  | 4.47E+01 | 1.20E+07 | 1.60E+07 | 1.90E+07 | 1.80E+07 |  | 2.40E+07 | 2.40E+07 |
| Q87L9    | Ribose-5-phosphate isomerase A OS=Vibrio parahaemolyticus serotype O3:K6 (strain RIMD 2210633) GN=rpiA PE=3 SV=1                                         | 16.9724771  | 2.32E+01 | 1.40E+07 | 1.20E+07 | 1.20E+07 | 6.90E+06 |  | 3.10E+07 | 2.80E+07 |
| Q87LM8   | tRNA-modifying protein YgZ OS=Vibrio parahaemolyticus serotype O3:K6 (strain RIMD 2210633) GN=VP2583 PE=3 SV=1                                           | 3.72870807  | 3.55E+01 | 2.60E+06 | 2.90E+06 | 1.90E+06 | 4.10E+06 |  | 3.60E+06 |          |
| Q87LP2   | Pyridoxine 5-phosphate synthase OS=Vibrio parahaemolyticus serotype O3:K6 (strain RIMD 2210633) GN=pxdJ PE=3 SV=1                                        | 19.3415638  | 2.67E+01 | 1.60E+07 | 2.50E+07 | 2.10E+07 | 1.90E+07 |  | 1.30E+07 | 1.10E+07 |
| Q87LQ0   | Enolase OS=Vibrio parahaemolyticus serotype O3:K6 (strain RIMD 2210633) GN=eno PE=3 SV=1                                                                 | 52.886836   | 4.55E+01 | 8.80E+07 | 9.50E+07 | 8.30E+07 | 6.70E+07 |  | 8.80E+07 | 8.10E+07 |
| Q87LR3   | Alanine-tRNA ligase OS=Vibrio parahaemolyticus serotype O3:K6 (strain RIMD 2210633) GN=alaS PE=3 SV=1                                                    | 2.09302326  | 9.93E+01 |          |          |          |          |  |          | 4.80E+06 |
| Q87LR5   | Carbon storage regulator homolog OS=Vibrio parahaemolyticus serotype O3:K6 (strain RIMD 2210633) GN=csrA PE=3 SV=1                                       | 16.4815385  | 7.108    | 2.80E+07 | 3.00E+07 | 1.90E+07 | 1.30E+07 |  | 2.50E+07 | 2.50E+07 |
| Q87LR7   | Oxaloacetate decarboxylase, alpha subunit OS=Vibrio parahaemolyticus serotype O3:K6 (strain RIMD 2210633) GN=VP2544 PE=4 SV=1                            | 3.52941176  | 6.42E+01 | 3.90E+06 |          |          | 3.50E+06 |  | 6.80E+06 | 7.40E+06 |
| Q87LS1   | Protease, insulinase family OS=Vibrio parahaemolyticus serotype O3:K6 (strain RIMD 2210633) GN=VP2540 PE=3 SV=1                                          | 10.4540655  | 1.06E+02 | 8.10E+06 | 7.50E+06 | 6.50E+06 | 6.30E+06 |  | 6.00E+06 | 4.00E+06 |
| Q87LS2   | Glutamate-cysteine ligase OS=Vibrio parahaemolyticus serotype O3:K6 (strain RIMD 2210633) GN=gshA PE=3 SV=1                                              | 8.42911877  | 5.90E+01 | 3.90E+06 | 4.50E+06 | 5.00E+06 | 3.40E+06 |  | 6.20E+06 |          |
| Q87LT1   | 50S ribosomal protein L19 OS=Vibrio parahaemolyticus serotype O3:K6 (strain RIMD 2210633) GN=rplS PE=3 SV=2                                              | 10.2564103  | 1.32E+01 |          |          |          |          |  |          |          |
| Q87L71   | NadC OS=Vibrio parahaemolyticus serotype O3:K6 (strain RIMD 2210633) GN=VP2522 PE=3 SV=1                                                                 | 15.9322034  | 3.20E+01 | 7.30E+06 | 5.30E+06 | 6.10E+06 | 6.80E+06 |  | 6.70E+06 | 6.70E+06 |
| Q87LU2   | Pyruvate dehydrogenase E1 component OS=Vibrio parahaemolyticus serotype O3:K6 (strain RIMD 2210633) GN=VP2519 PE=4 SV=1                                  | 35.9639233  | 9.96E+01 | 4.10E+07 | 4.30E+07 | 5.00E+07 | 3.80E+07 |  | 5.70E+07 | 5.40E+07 |
| Q87LU3   | Acetyltransferase component of pyruvate dehydrogenase complex OS=Vibrio parahaemolyticus serotype O3:K6 (strain RIMD 2210633) GN=VP2518 PE=3 SV=1        | 23.1259968  | 6.49E+01 | 1.30E+07 | 1.40E+07 | 1.90E+07 | 1.70E+07 |  | 2.90E+07 | 2.60E+07 |
| Q87LV1   | Pantothenate synthetase OS=Vibrio parahaemolyticus serotype O3:K6 (strain RIMD 2210633) GN=panC PE=3 SV=1                                                | 8.97009967  | 3.34E+01 | 6.20E+06 | 7.30E+06 | 5.40E+06 |          |  |          |          |
| Q87LW3   | Acconitate hydratase B OS=Vibrio parahaemolyticus serotype O3:K6 (strain RIMD 2210633) GN=VP2495 PE=3 SV=1                                               | 19.3063584  | 94.013   | 2.20E+07 | 1.90E+07 | 2.20E+07 | 6.00E+06 |  | 3.20E+07 | 1.70E+07 |
| Q87LW7   | Iron(III) ABC transporter, periplasmic iron-compound-binding protein OS=Vibrio parahaemolyticus serotype O3:K6 (strain RIMD 2210633) GN=VP2491 PE=4 SV=1 | 64.3916914  | 3.77E+01 | 3.70E+08 | 4.10E+08 | 4.60E+08 | 3.30E+08 |  | 4.00E+08 | 3.80E+08 |
| Q87LX0   | Putative phosphoglucosyltransferase OS=Vibrio parahaemolyticus serotype O3:K6 (strain RIMD 2210633) GN=VP2488 PE=4 SV=1                                  | 17.8723404  | 5.23E+01 |          |          |          |          |  | 7.70E+06 | 1.60E+07 |
| Q87LX1   | N,N'-diacetylchitobiose phosphorylase OS=Vibrio parahaemolyticus serotype O3:K6 (strain RIMD 2210633) GN=VP2487 PE=4 SV=1                                | 25.1870324  | 9.00E+01 | 2.10E+06 |          | 3.80E+06 | 9.90E+06 |  | 2.50E+07 | 5.50E+07 |
| Q87LX9   | Peptide ABC transporter, periplasmic peptide-binding protein OS=Vibrio parahaemolyticus serotype O3:K6 (strain RIMD 2210633) GN=VP2479 PE=4 SV=1         | 35.7142857  | 6.29E+01 |          |          | 1.10E+07 | 3.80E+07 |  | 1.50E+08 | 2.80E+08 |
| Q87ZL1   | Outer membrane protein U OS=Vibrio parahaemolyticus serotype O3:K6 (strain RIMD 2210633) GN=ompU PE=3 SV=1                                               | 31.7507418  | 3.63E+01 | 3.20E+08 | 5.20E+08 | 3.60E+08 | 3.30E+08 |  | 2.60E+08 | 2.10E+08 |
| Q87M02   | Translation initiation factor IF-2 OS=Vibrio parahaemolyticus serotype O3:K6 (strain RIMD 2210633) GN=infB PE=3 SV=1                                     | 0.77349066  | 9.93E+01 | 6.10E+06 |          |          |          |  |          | 5.60E+06 |
| Q87M05   | 30S ribosomal protein S15 OS=Vibrio parahaemolyticus serotype O3:K6 (strain RIMD 2210633) GN=rpsO PE=3 SV=1                                              | 6.74157303  | 1.01E+01 | 2.50E+07 |          | 3.20E+07 | 2.50E+07 |  | 4.80E+07 | 3.60E+07 |
| Q87M06   | Polyribonucleotide nucleotidyltransferase OS=Vibrio parahaemolyticus serotype O3:K6 (strain RIMD 2210633) GN=ppn PE=3 SV=1                               | 31.0829817  | 7.67E+01 | 2.00E+07 | 2.00E+07 | 2.60E+07 | 1.50E+07 |  | 2.70E+07 | 2.40E+07 |
| Q87M18   | Peptide chain release factor 3 OS=Vibrio parahaemolyticus serotype O3:K6 (strain RIMD 2210633) GN=prfC PE=3 SV=1                                         | 2.45746692  | 59.208   |          |          |          | 3.60E+06 |  |          |          |
| Q87M22   | Deoxyribose-phosphate aldolase OS=Vibrio parahaemolyticus serotype O3:K6 (strain RIMD 2210633) GN=deoC PE=3 SV=1                                         | 10.0775194  | 2.77E+01 | 1.80E+07 | 1.70E+07 | 1.40E+07 | 1.30E+07 |  | 1.40E+07 | 1.70E+07 |
| Q87M25   | Purine nucleoside phosphorylase DeoD-type 1 OS=Vibrio parahaemolyticus serotype O3:K6 (strain RIMD 2210633) GN=deoD1 PE=3 SV=1                           | 24.2677824  | 2.59E+01 | 1.90E+07 | 1.50E+07 | 1.60E+07 | 1.30E+07 |  | 1.80E+07 | 2.00E+07 |
| Q87M27   | Phosphoserine phosphatase OS=Vibrio parahaemolyticus serotype O3:K6 (strain RIMD 2210633) GN=VP2431 PE=4 SV=1                                            | 6.13499933  | 3.58E+01 |          |          | 4.50E+06 | 4.20E+06 |  | 4.10E+06 | 5.10E+06 |
| Q87M30   | Elongation factor G 2 OS=Vibrio parahaemolyticus serotype O3:K6 (strain RIMD 2210633) GN=efuA2 PE=3 SV=1                                                 | 18.8344828  | 7.63E+01 | 8.30E+07 | 8.60E+07 | 9.80E+07 | 5.00E+07 |  | 9.50E+07 | 8.70E+07 |
| Q87MA3   | Putative lipoprotein OS=Vibrio parahaemolyticus serotype O3:K6 (strain RIMD 2210633) GN=VP2354 PE=4 SV=1                                                 | 17.984418   | 2.07E+01 | 3.50E+06 | 4.20E+06 |          | 2.40E+06 |  | 8.10E+06 | 4.00E+06 |
| Q87MB7   | Uncharacterized protein OS=Vibrio parahaemolyticus serotype O3:K6 (strain RIMD 2210633) GN=VP2339 PE=4 SV=1                                              | 8.09716599  | 27.536   |          |          | 1.50E+07 | 1.80E+07 |  | 2.50E+07 | 2.30E+07 |
| Q87MB8   | Chitinase OS=Vibrio parahaemolyticus serotype O3:K6 (strain RIMD 2210633) GN=VP2338 PE=3 SV=1                                                            | 12.8179245  | 8.91E+01 | 1.20E+07 | 2.00E+07 | 3.40E+07 | 2.50E+07 |  | 6.30E+07 | 7.50E+07 |
| Q87M7    | Methionine aminopeptidase OS=Vibrio parahaemolyticus serotype O3:K6 (strain RIMD 2210633) GN=map PE=3 SV=1                                               | 2.39726027  | 3.23E+01 |          |          |          |          |  |          | 2.20E+06 |
| Q87M08   | 30S ribosomal protein S2 OS=Vibrio parahaemolyticus serotype O3:K6 (strain RIMD 2210633) GN=rpsB PE=3 SV=1                                               | 16.1157025  | 2.68E+01 | 1.30E+07 | 6.60E+06 | 1.40E+07 | 1.70E+07 |  | 2.40E+07 | 9.50E+06 |
| Q87M09</ |                                                                                                                                                          |             |          |          |          |          |          |  |          |          |



Table S1

|        |                                                                                                                                                                                       |            |          |          |          |          |          |          |          |          |
|--------|---------------------------------------------------------------------------------------------------------------------------------------------------------------------------------------|------------|----------|----------|----------|----------|----------|----------|----------|----------|
| Q87ND3 | Ribonucleoside-diphosphate reductase, beta subunit OS=Vibrio parahaemolyticus serotype O3:K6 (strain RIMD 2210633) GN=VP1935 PE=4 SV=1                                                | 5.0397878  | 4.37E+01 | 1.10E+07 |          |          | 8.40E+06 | 7.60E+06 | 1.00E+07 | 7.60E+06 |
| Q87ND6 | DNA gyrase subunit A OS=Vibrio parahaemolyticus serotype O3:K6 (strain RIMD 2210633) GN=gyrA PE=3 SV=1                                                                                | 1.02505695 | 9.70E+01 |          | 1.40E+06 |          |          |          |          | 2.30E+06 |
| Q87NF0 | Uncharacterized protein OS=Vibrio parahaemolyticus serotype O3:K6 (strain RIMD 2210633) GN=VP1918 PE=4 SV=1                                                                           | 3.76811594 | 38.455   | 4.40E+06 | 6.10E+06 | 3.80E+06 | 3.60E+06 | 3.50E+06 |          |          |
| Q87NF7 | Extracellular solute-binding protein, family 7 OS=Vibrio parahaemolyticus serotype O3:K6 (strain RIMD 2210633) GN=VP1911 PE=3 SV=1                                                    | 27.0718232 | 40.992   | 2.10E+07 | 2.50E+07 | 1.70E+07 | 2.00E+07 | 1.60E+07 | 1.70E+07 |          |
| Q87NG8 | Aspartate aminotransferase OS=Vibrio parahaemolyticus serotype O3:K6 (strain RIMD 2210633) GN=VP1900 PE=3 SV=1                                                                        | 63.0434783 | 4.54E+01 | 2.90E+06 | 3.30E+06 | 3.90E+06 | 3.00E+06 | 3.70E+06 | 3.30E+06 |          |
| Q87NH3 | Transcriptional regulator, GntR family OS=Vibrio parahaemolyticus serotype O3:K6 (strain RIMD 2210633) GN=VP1896 PE=4 SV=1                                                            | 4.53563715 | 5.23E+01 |          |          |          |          |          |          | 5.50E+07 |
| Q87NH5 | Asparagine-tRNA ligase OS=Vibrio parahaemolyticus serotype O3:K6 (strain RIMD 2210633) GN=VP1928 PE=3 SV=1                                                                            | 11.5879828 | 5.28E+01 | 1.00E+08 | 1.40E+07 | 9.00E+06 | 3.50E+06 | 1.30E+07 | 8.70E+06 |          |
| Q87NM9 | Uncharacterized protein OS=Vibrio parahaemolyticus serotype O3:K6 (strain RIMD 2210633) GN=VP1839 PE=4 SV=1                                                                           | 8.57142857 | 20.035   | 4.00E+06 |          | 3.20E+06 |          | 4.80E+06 |          |          |
| Q87NU7 | 4-aminobutyrate aminotransferase OS=Vibrio parahaemolyticus serotype O3:K6 (strain RIMD 2210633) GN=VP1771 PE=3 SV=1                                                                  | 2.83687943 | 4.51E+01 |          |          |          |          |          |          |          |
| Q87NX4 | Thermostable carboxypeptidase 1 OS=Vibrio parahaemolyticus serotype O3:K6 (strain RIMD 2210633) GN=VP1744 PE=4 SV=1                                                                   | 2.16535433 | 5.73E+01 |          |          | 6.10E+06 |          |          |          |          |
| Q87P08 | Glucose-6-phosphate 1-dehydrogenase OS=Vibrio parahaemolyticus serotype O3:K6 (strain RIMD 2210633) GN=zwf PE=3 SV=1                                                                  | 13.1736527 | 57.604   | 9.70E+06 | 8.20E+06 | 1.30E+07 | 6.30E+06 | 1.10E+07 | 9.30E+06 |          |
| Q87P09 | DevB protein OS=Vibrio parahaemolyticus serotype O3:K6 (strain RIMD 2210633) GN=VP1709 PE=4 SV=1                                                                                      | 4.20168067 | 2.60E+01 | 2.10E+07 | 2.60E+07 | 2.20E+07 | 1.40E+07 | 2.30E+07 | 2.00E+07 |          |
| Q87P10 | 6-phosphogluconate dehydrogenase, decarboxylating OS=Vibrio parahaemolyticus serotype O3:K6 (strain RIMD 2210633) GN=VP1708 PE=3 SV=1                                                 | 7.26141079 | 5.25E+01 | 2.30E+07 | 2.10E+07 | 2.50E+07 | 2.30E+07 | 2.60E+07 | 1.70E+07 |          |
| Q87P32 | Adenosine monophosphate-protein transferase VopS OS=Vibrio parahaemolyticus serotype O3:K6 (strain RIMD 2210633) GN=vopS PE=1 SV=1                                                    | 21.7054264 | 4.17E+01 | 9.70E+06 | 6.70E+06 | 9.00E+06 |          | 7.40E+06 | 7.70E+06 |          |
| Q87P59 | Uncharacterized protein OS=Vibrio parahaemolyticus serotype O3:K6 (strain RIMD 2210633) GN=VP1659 PE=4 SV=1                                                                           | 5.10708402 | 67.03    | 4.30E+06 |          | 6.00E+06 |          | 8.70E+06 | 8.10E+06 |          |
| Q87P60 | Low calcium response locus protein H OS=Vibrio parahaemolyticus serotype O3:K6 (strain RIMD 2210633) GN=VP1658 PE=4 SV=1                                                              | 5.55555556 | 1.81E+01 |          | 7.30E+06 | 4.80E+06 |          |          |          |          |
| Q87P63 | Immunoglobulin protein OS=Vibrio parahaemolyticus serotype O3:K6 (strain RIMD 2210633) GN=VP1655 PE=4 SV=1                                                                            | 2.78637771 | 34.901   | 1.50E+08 | 1.70E+08 | 1.70E+08 | 1.40E+08 | 1.80E+08 | 1.60E+08 |          |
| Q87P76 | Putative trypsin OS=Vibrio parahaemolyticus serotype O3:K6 (strain RIMD 2210633) GN=VP1642 PE=4 SV=1                                                                                  | 5.28336569 | 5.40E+01 |          |          |          |          | 7.80E+06 | 4.70E+06 |          |
| Q87P83 | Aminopeptidase N OS=Vibrio parahaemolyticus serotype O3:K6 (strain RIMD 2210633) GN=VP1604 PE=4 SV=1                                                                                  | 7.24137931 | 9.84E+01 | 7.10E+06 | 3.90E+06 | 7.00E+06 | 3.90E+06 | 5.90E+06 | 4.90E+06 |          |
| Q87P83 | Uncharacterized protein OS=Vibrio parahaemolyticus serotype O3:K6 (strain RIMD 2210633) GN=VP1594 PE=4 SV=1                                                                           | 45.8866221 | 64.624   | 2.40E+07 | 3.40E+07 | 2.70E+07 | 2.70E+07 | 2.10E+07 | 2.10E+07 |          |
| Q87PC5 | 3-hydroxydecanoyl-acyl-carrier-protein dehydratase OS=Vibrio parahaemolyticus serotype O3:K6 (strain RIMD 2210633) GN=fabA PE=3 SV=1                                                  | 22.6744186 | 1.90E+01 | 5.90E+07 | 7.60E+07 | 7.30E+07 | 5.90E+07 | 6.70E+07 | 6.00E+07 |          |
| Q87PG1 | Cbb3-type cytochrome c oxidase subunit OS=Vibrio parahaemolyticus serotype O3:K6 (strain RIMD 2210633) GN=VP1541 PE=3 SV=1                                                            | 3.08641975 | 3.54E+01 |          |          |          | 1.40E+06 | 3.00E+06 |          |          |
| Q87PH6 | Putrescine-binding periplasmic protein OS=Vibrio parahaemolyticus serotype O3:K6 (strain RIMD 2210633) GN=VP1526 PE=3 SV=1                                                            | 14.5492958 | 3.97E+01 | 5.70E+07 | 6.10E+07 | 4.90E+07 | 3.70E+07 | 4.50E+07 | 4.10E+07 |          |
| Q87PH7 | Putrescine-binding periplasmic protein OS=Vibrio parahaemolyticus serotype O3:K6 (strain RIMD 2210633) GN=VP1525 PE=3 SV=1                                                            | 12.7536232 | 3.90E+01 | 1.50E+07 | 2.00E+07 | 1.40E+07 | 1.30E+07 | 6.80E+06 | 1.30E+07 |          |
| Q87PJ7 | ABC transporter, ATP-binding protein OS=Vibrio parahaemolyticus serotype O3:K6 (strain RIMD 2210633) GN=VP1504 PE=4 SV=1                                                              | 2.07547117 | 5.98E+01 |          |          | 3.10E+06 |          |          |          |          |
| Q87PK2 | Uncharacterized protein OS=Vibrio parahaemolyticus serotype O3:K6 (strain RIMD 2210633) GN=VP1501 PE=1 SV=1                                                                           | 52.9411765 | 3.01E+01 | 3.80E+07 | 3.50E+07 | 4.30E+07 | 2.50E+07 | 4.10E+07 | 3.70E+07 |          |
| Q87PP6 | Uncharacterized protein OS=Vibrio parahaemolyticus serotype O3:K6 (strain RIMD 2210633) GN=VP1455 PE=4 SV=1                                                                           | 16.3742691 | 1.80E+01 | 3.30E+07 | 4.10E+07 | 2.30E+07 | 1.60E+07 | 1.70E+07 | 1.70E+07 |          |
| Q87PV1 | Uncharacterized protein OS=Vibrio parahaemolyticus serotype O3:K6 (strain RIMD 2210633) GN=VP1400 PE=4 SV=1                                                                           | 1.89504373 | 7.72E+01 |          | 1.40E+07 | 1.20E+07 |          |          |          |          |
| Q87Q03 | Oligopeptide ABC transporter, periplasmic oligopeptide-binding protein OS=Vibrio parahaemolyticus serotype O3:K6 (strain RIMD 2210633) GN=VP1347 PE=4 SV=1                            | 1.67910448 | 6.03E+01 |          |          |          | 8.80E+06 | 1.60E+07 |          |          |
| Q87Q24 | Uncharacterized protein OS=Vibrio parahaemolyticus serotype O3:K6 (strain RIMD 2210633) GN=VP1326 PE=4 SV=1                                                                           | 16.2878788 | 57.739   | 3.10E+07 | 2.30E+07 | 1.80E+07 | 1.50E+07 | 1.10E+07 | 1.10E+07 |          |
| Q87Q40 | Succinylglutamate desuccinylase OS=Vibrio parahaemolyticus serotype O3:K6 (strain RIMD 2210633) GN=asIE PE=1 SV=1                                                                     | 17.5438956 | 38.813   |          | 5.50E+06 | 8.40E+06 | 3.30E+06 | 9.00E+06 | 1.50E+07 |          |
| Q87Q42 | Putative oligopeptidase OS=Vibrio parahaemolyticus serotype O3:K6 (strain RIMD 2210633) GN=VP1308 PE=4 SV=1                                                                           | 5.50918197 | 6.80E+01 | 3.70E+06 | 4.00E+06 | 3.60E+06 | 2.90E+06 | 4.40E+06 | 3.40E+06 |          |
| Q87Q53 | Phosphoribosylglycinamide formyltransferase 2 OS=Vibrio parahaemolyticus serotype O3:K6 (strain RIMD 2210633) GN=purT PE=3 SV=1                                                       | 5.62659847 | 42.864   |          |          |          |          |          |          |          |
| Q87Q56 | Integration host factor subunit alpha OS=Vibrio parahaemolyticus serotype O3:K6 (strain RIMD 2210633) GN=hfa PE=3 SV=1                                                                | 10.2040816 | 1.12E+01 | 1.10E+07 | 6.40E+06 |          |          |          |          |          |
| Q87Q83 | Putative lipoprotein OS=Vibrio parahaemolyticus serotype O3:K6 (strain RIMD 2210633) GN=VP1267 PE=3 SV=1                                                                              | 5.40540541 | 2.37E+01 | 2.70E+06 |          |          | 2.60E+06 |          | 3.00E+06 |          |
| Q87Q87 | Phosphoribosylaminimidazole-succinocarboxamide synthase OS=Vibrio parahaemolyticus serotype O3:K6 (strain RIMD 2210633) GN=purC PE=3 SV=1                                             | 40.8719346 | 41.031   | 1.80E+07 | 2.70E+07 | 3.00E+07 | 1.80E+07 | 2.30E+07 | 2.10E+07 |          |
| Q87Q92 | NAD-dependent malic enzyme OS=Vibrio parahaemolyticus serotype O3:K6 (strain RIMD 2210633) GN=maeA PE=3 SV=1                                                                          | 2.68903915 | 6.23E+01 |          |          | 6.30E+06 |          |          |          |          |
| Q87Q99 | Thioredoxin reductase OS=Vibrio parahaemolyticus serotype O3:K6 (strain RIMD 2210633) GN=VP1251 PE=3 SV=1                                                                             | 19.253805  | 3.45E+01 | 2.10E+07 | 2.20E+07 | 2.40E+07 | 1.40E+07 | 2.20E+07 | 2.00E+07 |          |
| Q87Q03 | Phosphoserine aminotransferase OS=Vibrio parahaemolyticus serotype O3:K6 (strain RIMD 2210633) GN=serC PE=3 SV=1                                                                      | 25.5494505 | 4.02E+01 | 3.80E+07 | 4.00E+07 | 4.00E+07 | 2.80E+07 | 3.80E+07 | 3.50E+07 |          |
| Q87Q7  | Uncharacterized protein OS=Vibrio parahaemolyticus serotype O3:K6 (strain RIMD 2210633) GN=VP1243 PE=4 SV=1                                                                           | 23.2044199 | 1.98E+01 | 1.50E+07 | 3.10E+07 | 1.70E+07 | 1.40E+07 |          |          |          |
| Q87Q87 | Glutaredoxin 1 OS=Vibrio parahaemolyticus serotype O3:K6 (strain RIMD 2210633) GN=VP1233 PE=4 SV=1                                                                                    | 12.5       | 1.00E+01 |          |          | 4.20E+06 |          |          |          |          |
| Q87Q89 | Putative reductase VP1231 OS=Vibrio parahaemolyticus serotype O3:K6 (strain RIMD 2210633) GN=VP1231 PE=3 SV=1                                                                         | 45.75      | 43.941   | 4.10E+07 | 3.70E+07 | 4.40E+07 | 2.70E+07 | 4.50E+07 | 3.90E+07 |          |
| Q87Q82 | UDP-sugar hydrolase OS=Vibrio parahaemolyticus serotype O3:K6 (strain RIMD 2210633) GN=VP1207 PE=3 SV=1                                                                               | 7.62413448 | 61.263   | 1.10E+07 | 1.40E+07 | 8.60E+06 | 1.20E+07 | 8.20E+06 | 9.30E+06 |          |
| Q87Q86 | Heat shock protein HslJ OS=Vibrio parahaemolyticus serotype O3:K6 (strain RIMD 2210633) GN=VP1203 PE=4 SV=1                                                                           | 26.3513514 | 16.586   | 3.10E+07 | 5.60E+07 | 4.10E+07 | 3.50E+07 | 3.60E+07 | 3.60E+07 |          |
| Q87QF3 | Putative ABC transporter, periplasmic substrate-binding protein OS=Vibrio parahaemolyticus serotype O3:K6 (strain RIMD 2210633) GN=VP1196 PE=4 SV=1                                   | 2.58067358 | 4.26E+01 | 8.60E+06 | 8.90E+06 | 9.70E+06 | 7.80E+06 | 7.60E+06 | 7.20E+06 |          |
| Q87QK7 | Cystathionine beta-lyase OS=Vibrio parahaemolyticus serotype O3:K6 (strain RIMD 2210633) GN=VP1182 PE=3 SV=1                                                                          | 3.23383085 | 4.48E+01 |          |          | 6.60E+06 | 5.00E+06 | 8.20E+06 | 6.70E+06 |          |
| Q87Q0G | 1-(5-phosphoribosyl)-5-[(5-phosphoribosyl)amino]methylideneamino] imidazole-4-carboxamide isomerase OS=Vibrio parahaemolyticus serotype O3:K6 (strain RIMD 2210633) GN=hisA PE=3 SV=1 | 19.5918367 | 2.64E+01 | 1.00E+07 | 1.10E+07 |          | 6.10E+06 | 7.10E+06 | 8.10E+06 |          |
| Q87QK9 | Histidine biosynthesis bifunctional protein HisB OS=Vibrio parahaemolyticus serotype O3:K6 (strain RIMD 2210633) GN=hisP PE=3 SV=1                                                    | 2.80112045 | 3.98E+01 |          | 4.50E+06 | 4.50E+06 |          | 4.80E+06 | 4.50E+06 |          |
| Q87QL0 | Histidinol-phosphate aminotransferase OS=Vibrio parahaemolyticus serotype O3:K6 (strain RIMD 2210633) GN=hisC PE=3 SV=1                                                               | 10.1156069 | 3.82E+01 | 1.00E+07 | 8.70E+06 | 8.10E+06 |          | 1.50E+07 | 9.30E+06 |          |
| Q87QL1 | Histidinol dehydrogenase OS=Vibrio parahaemolyticus serotype O3:K6 (strain RIMD 2210633) GN=hisD PE=3 SV=1                                                                            | 25.2900232 | 46.07    | 2.60E+07 | 1.40E+07 | 2.70E+07 | 1.00E+07 | 2.60E+07 | 2.20E+07 |          |
| Q87QL2 | ATP phosphoribosyltransferase OS=Vibrio parahaemolyticus serotype O3:K6 (strain RIMD 2210633) GN=hisG PE=3 SV=1                                                                       | 33.557047  | 3.28E+01 | 3.20E+07 | 3.00E+07 | 3.20E+07 | 1.90E+07 | 3.00E+07 | 3.00E+07 |          |
| Q87QL6 | DNA-binding protein OS=Vibrio parahaemolyticus serotype O3:K6 (strain RIMD 2210633) GN=VP1133 PE=3 SV=1                                                                               | 9.62962963 | 1.51E+01 | 5.80E+06 |          |          |          |          |          |          |
| Q87QM1 | Adenylosuccinate lyase OS=Vibrio parahaemolyticus serotype O3:K6 (strain RIMD 2210633) GN=VP1128 PE=3 SV=1                                                                            | 24.7807918 | 5.14E+01 | 2.10E+07 | 2.00E+07 | 2.50E+07 | 1.70E+07 | 1.80E+07 | 1.80E+07 |          |
| Q87QP1 | Serine-tRNA ligase OS=Vibrio parahaemolyticus serotype O3:K6 (strain RIMD 2210633) GN=serS PE=3 SV=1                                                                                  | 17.7011494 | 4.88E+01 | 1.30E+07 | 1.20E+07 | 1.20E+07 | 7.00E+06 | 1.60E+07 | 1.40E+07 |          |
| Q87QP6 | Alanine dehydrogenase OS=Vibrio parahaemolyticus serotype O3:K6 (strain RIMD 2210633) GN=VP1103 PE=3 SV=1                                                                             | 52.1390374 | 3.99E+01 | 4.80E+07 | 7.40E+07 | 4.00E+07 | 4.20E+07 | 3.50E+07 | 3.90E+07 |          |
| Q87QT7 | Uncharacterized protein OS=Vibrio parahaemolyticus serotype O3:K6 (strain RIMD 2210633) GN=VP1062 PE=4 SV=1                                                                           | 6.78490424 | 2.83E+01 |          |          |          | 7.60E+06 |          | 9.70E+06 |          |
| Q87Q78 | Peptidoglycan-associated lipoprotein OS=Vibrio parahaemolyticus serotype O3:K6 (strain RIMD 2210633) GN=VP1061 PE=3 SV=1                                                              | 12.6436782 | 1.87E+01 | 3.20E+07 | 3.50E+07 | 2.40E+07 | 2.90E+07 | 3.30E+07 | 3.30E+07 |          |
| Q87QT9 | Protein TolB OS=Vibrio parahaemolyticus serotype O3:K6 (strain RIMD 2210633) GN=tolB PE=3 SV=1                                                                                        | 37.5555556 | 4.98E+01 | 2.40E+07 | 2.80E+07 | 2.10E+07 | 2.30E+07 | 1.90E+07 | 1.70E+07 |          |
| Q87QV2 | Aspartate-tRNA ligase OS=Vibrio parahaemolyticus serotype O3:K6 (strain RIMD 2210633) GN=aspE PE=3 SV=1                                                                               | 1.52027027 | 6.57E+01 |          |          |          |          | 1.80E+06 |          |          |
| Q87QV7 | Uncharacterized protein OS=Vibrio parahaemolyticus serotype O3:K6 (strain RIMD 2210633) GN=VP1043 PE=4 SV=1                                                                           | 3.62903226 | 2.81E+01 | 5.60E+06 | 6.10E+06 | 5.40E+06 | 3.60E+06 |          | 4.00E+06 |          |
| Q87QX6 | Glucose-1-phosphate adenylyltransferase 1 OS=Vibrio parahaemolyticus serotype O3:K6 (strain RIMD 2210633) GN=glgC1 PE=3 SV=1                                                          | 5.92529593 | 4.55E+01 | 8.60E+06 |          |          |          |          |          |          |
| Q87QX9 | 3-phosphoshikimate 1-carboxyvinyltransferase OS=Vibrio parahaemolyticus serotype O3:K6 (strain RIMD 2210633) GN=aroA PE=3 SV=1                                                        | 4.69483568 | 4.61E+01 | 8.70E+06 |          |          |          |          |          |          |
| Q87QY7 | Isocitrate dehydrogenase OS=Vibrio parahaemolyticus serotype O3:K6 (strain RIMD 2210633) GN=VP1011 PE=4 SV=1                                                                          | 6.19433198 | 80.465   | 9.50E+07 | 9.60E+07 | 1.10E+08 | 6.30E+07 | 1.10E+08 | 8.20E+07 |          |
| Q87QZ9 | Amino acid ABC transporter, periplasmic amino acid-binding protein OS=Vibrio parahaemolyticus serotype O3:K6 (strain RIMD 2210633) GN=VP0999 PE=3 SV=1                                | 64.7286822 | 2.84E+01 | 8.40E+07 | 1.00E+08 | 1.00E+08 | 7.40E+07 | 8.50E+07 | 8.90E+07 |          |
| Q87R02 | Putative 54 kDa polar flagellar sheath protein A OS=Vibrio parahaemolyticus serotype O3:K6 (strain RIMD 2210633) GN=VP0996 PE=4 SV=1                                                  | 55.3497942 | 52.283   | 5.80E+07 | 8.80E+07 | 8.10E+07 | 7.40E+07 | 5.70E+07 | 5.60E+07 |          |
| Q87R04 | Formate acetyltransferase OS=Vibrio parahaemolyticus serotype O3:K6 (strain RIMD 2210633) GN=VP0984 PE=4 SV=1                                                                         | 50.3957784 | 8.45E+01 | 5.90E+07 | 7.70E+07 | 1.10E+08 | 8.00E+07 | 1.10E+08 | 1.10E+08 |          |
| Q87R31 | Uncharacterized protein OS=Vibrio parahaemolyticus serotype O3:K6 (strain RIMD 2210633) GN=VP0967 PE=4 SV=1                                                                           | 25         | 2.18E+01 | 2.40E+07 |          | 2.20E+07 | 2.00E+07 |          |          |          |
| Q87R32 | Uncharacterized protein OS=Vibrio parahaemolyticus serotype O3:K6 (strain RIMD 2210633) GN=VP0966 PE=4 SV=1                                                                           | 33.8461538 | 14.666   | 4.30E+06 | 8.80E+06 | 5.50E+06 | 4.00E+06 | 4.30E+06 | 3.30E+06 |          |

| Accession | Description                                                                                                                                      | Coverage   | HMW [kDa] | Control  | GlcNAc <sub>0</sub> | GlcN     | GlcNAc <sub>2</sub> | GlcN <sub>2</sub> | GlcNAc <sub>0</sub> -GlcN |
|-----------|--------------------------------------------------------------------------------------------------------------------------------------------------|------------|-----------|----------|---------------------|----------|---------------------|-------------------|---------------------------|
| Q87RM3    | N,N'-diacetylchitinase OS=Vibrio parahaemolyticus serotype O3:K6 (strain RIMD 2210633) GN=VP0755 PE=4 SV=1                                       | 12.797282  | 9.76E+01  |          |                     |          | 8.50E+06            |                   | 1.70E+07                  |
| Q87RNO    | 2-dehydro-3-deoxyphosphocarbonate aldolase OS=Vibrio parahaemolyticus serotype O3:K6 (strain RIMD 2210633) GN=kdsA PE=3 SV=1                     | 18.7279152 | 30.79     | 1.10E+07 | 1.20E+07            | 1.30E+07 | 7.60E+06            | 3.00E+06          | 9.30E+06                  |
| Q87RN8    | Ribose-phosphate pyrophosphokinase OS=Vibrio parahaemolyticus serotype O3:K6 (strain RIMD 2210633) GN=prs PE=3 SV=1                              | 21.0191083 | 3.39E+01  | 6.90E+06 | 8.80E+06            | 1.10E+07 | 8.00E+06            | 1.00E+07          | 9.50E+06                  |
| Q87RQ0    | Leucine-tRNA ligase OS=Vibrio parahaemolyticus serotype O3:K6 (strain RIMD 2210633) GN=leuS PE=3 SV=1                                            | 17.9696616 | 96.593    | 1.70E+07 | 1.80E+07            | 2.00E+07 | 1.50E+07            | 1.90E+07          | 2.20E+07                  |
| Q87RQ1    | LPS-assembly lipoprotein LptE OS=Vibrio parahaemolyticus serotype O3:K6 (strain RIMD 2210633) GN=lptE PE=3 SV=1                                  | 11.6666667 | 20.459    | 5.40E+06 | 7.50E+06            | 6.40E+06 | 4.30E+06            |                   | 4.10E+06                  |
| Q87RR2    | Serine hydroxymethyltransferase 1 OS=Vibrio parahaemolyticus serotype O3:K6 (strain RIMD 2210633) GN=shmt1 PE=3 SV=1                             | 6.97115385 | 45.476    |          |                     | 1.90E+06 | 3.40E+06            | 5.40E+06          | 3.70E+06                  |
| Q87RS3    | Lipoprotein OS=Vibrio parahaemolyticus serotype O3:K6 (strain RIMD 2210633) GN=VPO704 PE=3 SV=1                                                  | 40.8921933 | 2.91E+01  | 1.60E+07 | 2.10E+07            | 1.20E+07 | 1.70E+07            | 2.80E+07          | 2.30E+07                  |
| Q87RU4    | 6,7-dimethyl-8-ribityllysine synthase OS=Vibrio parahaemolyticus serotype O3:K6 (strain RIMD 2210633) GN=rhb PE=3 SV=1                           | 44.8717949 | 1.64E+01  | 1.90E+07 | 1.40E+07            | 2.30E+07 | 1.70E+07            | 2.10E+07          | 1.40E+07                  |
| Q87RU5    | 3,4-dihydroxy-2-butanone 4-phosphate synthase OS=Vibrio parahaemolyticus serotype O3:K6 (strain RIMD 2210633) GN=rhb PE=3 SV=1                   | 8.40108401 | 4.01E+01  | 3.40E+06 | 2.60E+06            | 3.10E+06 |                     | 3.30E+06          | 3.70E+06                  |
| Q87RV5    | Aminoacyl-histidine dipeptidase OS=Vibrio parahaemolyticus serotype O3:K6 (strain RIMD 2210633) GN=VP0671 PE=4 SV=1                              | 5.51020408 | 5.36E+01  | 5.40E+06 | 5.60E+06            | 5.40E+06 | 3.70E+06            | 8.80E+06          | 4.20E+06                  |
| Q87RV7    | Uncharacterized protein OS=Vibrio parahaemolyticus serotype O3:K6 (strain RIMD 2210633) GN=VP0669 PE=4 SV=1                                      | 6.48067416 | 3.90E+01  |          |                     | 7.60E+06 |                     |                   | 5.70E+06                  |
| Q87RW3    | Chaperone protein DnaK OS=Vibrio parahaemolyticus serotype O3:K6 (strain RIMD 2210633) GN=dnaK PE=3 SV=1                                         | 35.6357928 | 6.90E+01  | 2.60E+07 | 3.80E+07            | 3.30E+07 | 2.00E+07            | 2.70E+07          | 1.50E+07                  |
| Q87S05    | Putative chitinase OS=Vibrio parahaemolyticus serotype O3:K6 (strain RIMD 2210633) GN=VP0619 PE=4 SV=1                                           | 37.630662  | 6.35E+01  | 3.00E+07 | 3.60E+07            | 8.10E+07 | 5.70E+07            |                   | 9.20E+06                  |
| Q87S07    | GMP synthase [glutamine-hydrolyzing] OS=Vibrio parahaemolyticus serotype O3:K6 (strain RIMD 2210633) GN=guaA PE=3 SV=1                           | 6.38297872 | 57.835    | 9.50E+06 | 8.10E+06            | 1.20E+07 | 4.10E+06            | 1.20E+07          | 8.20E+06                  |
| Q87S08    | Inosine-5'-monophosphate dehydrogenase OS=Vibrio parahaemolyticus serotype O3:K6 (strain RIMD 2210633) GN=guaB PE=3 SV=1                         | 7.55102041 | 5.19E+01  | 5.60E+06 | 4.10E+06            | 5.10E+06 | 2.80E+06            | 1.50E+07          |                           |
| Q87S13    | Outer membrane protein assembly factor BamB OS=Vibrio parahaemolyticus serotype O3:K6 (strain RIMD 2210633) GN=bamB PE=3 SV=1                    | 3.62694301 | 4.15E+01  |          |                     |          | 2.70E+06            |                   |                           |
| Q87S15    | Histidine-tRNA ligase OS=Vibrio parahaemolyticus serotype O3:K6 (strain RIMD 2210633) GN=hisS PE=3 SV=1                                          | 2.8436019  | 4.71E+01  |          |                     |          | 7.40E+06            |                   |                           |
| Q87S21    | Peptidase B OS=Vibrio parahaemolyticus serotype O3:K6 (strain RIMD 2210633) GN=pepB PE=3 SV=1                                                    | 1.85185185 | 4.66E+01  |          |                     |          |                     |                   | 4.40E+06                  |
| Q87S31    | Inositol monophosphate family protein OS=Vibrio parahaemolyticus serotype O3:K6 (strain RIMD 2210633) GN=VPO593 PE=4 SV=1                        | 9.98876404 | 2.91E+01  | 5.30E+06 | 4.30E+06            | 5.30E+06 | 4.60E+06            | 6.20E+06          | 5.20E+06                  |
| Q87S40    | Isocitrate lyase OS=Vibrio parahaemolyticus serotype O3:K6 (strain RIMD 2210633) GN=VPO584 PE=4 SV=1                                             | 5.04581756 | 48.039    | 4.30E+06 |                     |          |                     |                   |                           |
| Q87S44    | Antioxidant, AhpC/Tsa family OS=Vibrio parahaemolyticus serotype O3:K6 (strain RIMD 2210633) GN=VPO580 PE=4 SV=1                                 | 50.7389163 | 2.22E+01  | 1.70E+08 | 2.20E+08            | 1.50E+08 | 8.30E+07            | 1.40E+08          | 1.30E+08                  |
| Q87S63    | Chaperone protein CtpB OS=Vibrio parahaemolyticus serotype O3:K6 (strain RIMD 2210633) GN=ctpB PE=3 SV=1                                         | 2.10035006 | 9.58E+01  | 4.10E+06 | 4.00E+06            | 2.40E+06 |                     | 4.80E+06          | 3.40E+06                  |
| Q87S84    | Putative carbon starvation protein A OS=Vibrio parahaemolyticus serotype O3:K6 (strain RIMD 2210633) GN=VPO540 PE=4 SV=1                         | 2.4291498  | 53.283    | 3.10E+06 |                     |          |                     |                   | 4.20E+06                  |
| Q87S99    | Uncharacterized protein OS=Vibrio parahaemolyticus serotype O3:K6 (strain RIMD 2210633) GN=VPO25 PE=4 SV=1                                       | 16.8831169 | 4.39E+01  | 1.30E+07 | 1.40E+07            | 1.50E+07 | 8.60E+06            | 1.00E+07          | 8.50E+06                  |
| Q87SA8    | Oxidoreductase Tas, aldo-/keto reductase family OS=Vibrio parahaemolyticus serotype O3:K6 (strain RIMD 2210633) GN=VPO516 PE=4 SV=1              | 19.0340909 | 3.97E+01  | 1.90E+07 | 2.00E+07            | 2.40E+07 | 1.60E+07            | 2.50E+07          | 2.40E+07                  |
| Q87SB4    | Thiol-disulfide interchange protein DsbC OS=Vibrio parahaemolyticus serotype O3:K6 (strain RIMD 2210633) GN=VPO510 PE=4 SV=1                     | 3.05343511 | 2.86E+01  | 9.30E+06 | 9.90E+06            | 6.80E+06 |                     |                   |                           |
| Q87SC7    | Autonomous glycol radical cofactor OS=Vibrio parahaemolyticus serotype O3:K6 (strain RIMD 2210633) GN=grcA PE=3 SV=1                             | 5.6        | 13.92     |          |                     |          |                     |                   | 2.10E+07                  |
| Q87SC8    | Threonine synthase OS=Vibrio parahaemolyticus serotype O3:K6 (strain RIMD 2210633) GN=VPO496 PE=4 SV=1                                           | 6.10328638 | 4.65E+01  | 6.80E+06 | 6.40E+06            | 3.30E+06 | 3.30E+06            | 7.20E+06          | 5.80E+06                  |
| Q87SC9    | Homoserine kinase OS=Vibrio parahaemolyticus serotype O3:K6 (strain RIMD 2210633) GN=thrK PE=3 SV=1                                              | 8.17610063 | 3.44E+01  | 1.80E+07 | 2.50E+07            | 2.70E+07 | 1.50E+07            | 3.00E+07          | 2.60E+07                  |
| Q87SD2    | Putative 4-hydroxy-4-methyl-2-oxoglutarate aldolase OS=Vibrio parahaemolyticus serotype O3:K6 (strain RIMD 2210633) GN=VPO492 PE=3 SV=1          | 6.25       | 17.697    | 6.80E+06 |                     | 5.80E+06 |                     |                   | 8.50E+06                  |
| Q87SD6    | Putative DNA polymerase III, beta chain OS=Vibrio parahaemolyticus serotype O3:K6 (strain RIMD 2210633) GN=VPO488 PE=4 SV=1                      | 8.44155844 | 1.73E+01  | 3.90E+07 | 4.00E+07            | 6.90E+07 |                     |                   | 1.70E+07                  |
| Q87SE0    | Glutamate synthase, large subunit OS=Vibrio parahaemolyticus serotype O3:K6 (strain RIMD 2210633) GN=VPO484 PE=4 SV=1                            | 10.9917877 | 1.75E+02  | 1.30E+07 | 1.10E+07            | 1.00E+07 | 1.30E+07            | 1.50E+07          | 1.50E+07                  |
| Q87SE2    | Glutamate synthase, large subunit OS=Vibrio parahaemolyticus serotype O3:K6 (strain RIMD 2210633) GN=VPO482 PE=4 SV=1                            | 8.60793544 | 1.63E+02  | 9.80E+06 | 9.40E+06            | 8.10E+06 | 3.30E+06            | 1.10E+07          | 9.50E+06                  |
| Q87SE3    | Glutamate synthase, small subunit OS=Vibrio parahaemolyticus serotype O3:K6 (strain RIMD 2210633) GN=VPO481 PE=4 SV=1                            | 4.04255319 | 5.25E+01  | 4.00E+06 | 3.90E+06            |          |                     |                   |                           |
| Q87SF3    | Carbamoyl-phosphate synthase large chain OS=Vibrio parahaemolyticus serotype O3:K6 (strain RIMD 2210633) GN=carB PE=3 SV=1                       | 2.13556175 | 1.18E+02  | 4.80E+06 | 4.40E+06            | 4.90E+06 | 5.00E+06            | 6.60E+06          | 8.00E+06                  |
| Q87SF5    | 4-hydroxy-tetrahydrodipicolinate reductase OS=Vibrio parahaemolyticus serotype O3:K6 (strain RIMD 2210633) GN=dapB PE=3 SV=1                     | 41.6356877 | 2.86E+01  | 2.80E+07 | 3.40E+07            | 3.10E+07 | 2.10E+07            | 2.70E+07          | 2.00E+07                  |
| Q87SF7    | Protein translocase subunit SecA OS=Vibrio parahaemolyticus serotype O3:K6 (strain RIMD 2210633) GN=secA PE=3 SV=1                               | 1.43171806 | 1.03E+02  | 4.00E+06 |                     | 3.30E+06 |                     |                   |                           |
| Q87SH4    | Penicillin-binding protein activator LpoA OS=Vibrio parahaemolyticus serotype O3:K6 (strain RIMD 2210633) GN=lpoA PE=3 SV=1                      | 2.48758219 | 67.514    |          |                     |          | 4.40E+06            |                   |                           |
| Q87SH9    | Stringent starvation protein A OS=Vibrio parahaemolyticus serotype O3:K6 (strain RIMD 2210633) GN=VPO444 PE=3 SV=1                               | 16.1137441 | 2.43E+01  | 9.20E+06 | 1.30E+07            | 1.20E+07 | 5.40E+06            | 1.70E+07          | 1.50E+07                  |
| Q87S14    | 30S ribosomal protein S9 OS=Vibrio parahaemolyticus serotype O3:K6 (strain RIMD 2210633) GN=rpsL PE=3 SV=1                                       | 33.8461538 | 1.46E+01  | 7.50E+06 | 7.10E+06            | 8.10E+06 | 7.30E+06            | 1.20E+07          | 1.30E+07                  |
| Q87S15    | 50S ribosomal protein L13 OS=Vibrio parahaemolyticus serotype O3:K6 (strain RIMD 2210633) GN=rplM PE=3 SV=1                                      | 5.63380282 | 1.80E+01  |          |                     |          | 4.70E+06            | 8.80E+06          | 1.00E+07                  |
| Q87S19    | Protease DO OS=Vibrio parahaemolyticus serotype O3:K6 (strain RIMD 2210633) GN=VPO433 PE=4 SV=1                                                  | 16.2637363 | 4.81E+01  | 1.40E+07 | 1.60E+07            | 1.50E+07 | 9.80E+06            | 1.30E+07          | 1.20E+07                  |
| Q87S18    | Outer membrane protein TolC OS=Vibrio parahaemolyticus serotype O3:K6 (strain RIMD 2210633) GN=VPO425 PE=4 SV=1                                  | 3.36651616 | 4.80E+01  | 1.80E+07 | 1.70E+07            | 1.10E+07 | 1.30E+07            | 1.20E+07          | 1.10E+07                  |
| Q87SK3    | Uncharacterized protein OS=Vibrio parahaemolyticus serotype O3:K6 (strain RIMD 2210633) GN=VPO420 PE=4 SV=1                                      | 8.02348337 | 59.202    | 3.20E+06 | 4.30E+06            | 8.20E+06 | 4.50E+06            | 6.40E+06          | 5.30E+06                  |
| Q87SL6    | Uncharacterized protein OS=Vibrio parahaemolyticus serotype O3:K6 (strain RIMD 2210633) GN=VPO406 PE=4 SV=1                                      | 7.4829932  | 1.61E+01  | 1.80E+06 | 2.00E+06            |          |                     |                   |                           |
| Q87SR6    | Pyruvate kinase OS=Vibrio parahaemolyticus serotype O3:K6 (strain RIMD 2210633) GN=VPO356 PE=3 SV=1                                              | 6.59574468 | 49.941    | 1.00E+07 | 5.30E+06            | 6.80E+06 | 5.50E+06            | 6.60E+06          |                           |
| Q87S73    | 3-isopropylmalate dehydrogenase OS=Vibrio parahaemolyticus serotype O3:K6 (strain RIMD 2210633) GN=leuB PE=3 SV=1                                | 4.40359313 | 3.93E+01  | 4.50E+07 | 4.90E+07            | 5.00E+07 | 3.60E+07            | 4.50E+07          | 4.20E+07                  |
| Q87S73    | LPS-assembly protein LptD OS=Vibrio parahaemolyticus serotype O3:K6 (strain RIMD 2210633) GN=lptD PE=3 SV=1                                      | 1.79257362 | 8.92E+01  |          |                     |          |                     |                   | 2.00E+06                  |
| Q87S74    | Chaperone SurA OS=Vibrio parahaemolyticus serotype O3:K6 (strain RIMD 2210633) GN=surA PE=3 SV=1                                                 | 9.3676815  | 4.74E+01  | 6.70E+06 | 9.60E+06            | 6.40E+06 | 6.60E+06            | 1.00E+07          | 3.90E+06                  |
| Q87SU4    | 50S ribosomal protein L21 OS=Vibrio parahaemolyticus serotype O3:K6 (strain RIMD 2210633) GN=rplU PE=3 SV=1                                      | 60.1941748 | 1.15E+01  | 7.40E+06 | 7.50E+06            | 7.00E+06 | 8.20E+06            | 2.10E+07          | 2.10E+07                  |
| Q87SU7    | Malate dehydrogenase OS=Vibrio parahaemolyticus serotype O3:K6 (strain RIMD 2210633) GN=mdh PE=3 SV=1                                            | 61.7363344 | 3.22E+01  | 4.90E+07 | 5.50E+07            | 4.50E+07 | 2.90E+07            | 4.10E+07          | 3.40E+07                  |
| Q87SV0    | Immunogenic protein OS=Vibrio parahaemolyticus serotype O3:K6 (strain RIMD 2210633) GN=VPO323 PE=4 SV=1                                          | 70.8074534 | 3.45E+01  | 2.50E+08 | 2.70E+08            | 2.90E+08 | 2.20E+08            | 3.10E+08          | 2.80E+08                  |
| Q87SV6    | Thiamin ABC transporter, periplasmic thiamin-binding protein OS=Vibrio parahaemolyticus serotype O3:K6 (strain RIMD 2210633) GN=VPO316 PE=4 SV=1 | 11.5151515 | 3.65E+01  | 1.20E+07 | 1.50E+07            | 1.90E+07 | 1.50E+07            | 1.70E+07          | 1.90E+07                  |
| Q87SW5    | Uncharacterized protein OS=Vibrio parahaemolyticus serotype O3:K6 (strain RIMD 2210633) GN=VPO307 PE=4 SV=1                                      | 3.50877193 | 6.38E+01  |          |                     |          |                     |                   |                           |
| Q87SW6    | Peptide methionine sulfoxide reductase MsrA OS=Vibrio parahaemolyticus serotype O3:K6 (strain RIMD 2210633) GN=msrA PE=3 SV=1                    | 4.49056604 | 23.602    | 5.10E+06 | 4.90E+06            | 3.90E+06 |                     | 6.20E+06          |                           |
| Q87SX0    | Uncharacterized protein OS=Vibrio parahaemolyticus serotype O3:K6 (strain RIMD 2210633) GN=VPO302 PE=4 SV=1                                      | 3.8277512  | 23.29     | 6.40E+07 | 8.30E+07            | 5.60E+07 | 3.50E+07            | 5.40E+07          | 4.80E+07                  |
| Q87SY2    | 2',3'-cyclic-nucleotide 2'-phosphodiesterase OS=Vibrio parahaemolyticus serotype O3:K6 (strain RIMD 2210633) GN=VPO290 PE=3 SV=1                 | 14.5923939 | 7.21E+01  | 1.30E+07 | 1.50E+07            | 1.60E+07 | 9.80E+06            | 1.80E+07          | 1.00E+07                  |
| Q87SY9    | 50S ribosomal protein L17 OS=Vibrio parahaemolyticus serotype O3:K6 (strain RIMD 2210633) GN=rplQ PE=3 SV=1                                      | 14.2857143 | 1.42E+01  | 1.40E+07 | 2.10E+07            | 2.50E+07 |                     | 2.50E+07          |                           |
| Q87SZ0    | DNA-directed RNA polymerase subunit alpha OS=Vibrio parahaemolyticus serotype O3:K6 (strain RIMD 2210633) GN=rpoA PE=3 SV=1                      | 13.9393939 | 36.45     | 1.20E+07 | 1.60E+07            | 1.30E+07 | 7.10E+06            | 1.70E+07          | 1.20E+07                  |
| Q87SZ1    | 30S ribosomal protein S4 OS=Vibrio parahaemolyticus serotype O3:K6 (strain RIMD 2210633) GN=rpsD PE=3 SV=1                                       | 35.9223301 | 2.33E+01  | 1.20E+07 | 3.70E+07            | 3.20E+07 | 2.90E+07            | 4.00E+07          | 3.50E+07                  |
| Q87SZ2    | 30S ribosomal protein S13 OS=Vibrio parahaemolyticus serotype O3:K6 (strain RIMD 2210633) GN=rpsM PE=3 SV=1                                      | 63.559322  | 1.33E+01  | 1.80E+07 | 2.50E+07            | 1.80E+07 | 1.90E+07            | 4.00E+07          | 3.00E+07                  |
| Q87SZ4    | 50S ribosomal protein L15 OS=Vibrio parahaemolyticus serotype O3:K6 (strain RIMD 2210633) GN=rplO PE=3 SV=1                                      | 6.25       | 1.49E+01  | 7.20E+06 | 1.40E+07            | 7.60E+06 | 6.80E+06            | 1.20E+07          | 8.70E+06                  |
| Q87SZ7    | 50S ribosomal protein L18 OS=Vibrio parahaemolyticus serotype O3:K6 (strain RIMD 2210633) GN=rplR PE=3 SV=1                                      | 15.3846154 | 1.26E+01  | 6.20E+06 | 7.40E+06            | 5.10E+06 | 6.10E+06            | 9.60E+06          | 7.70E+06                  |
| Q87SZ8    | 50S ribosomal protein L6 OS=Vibrio parahaemolyticus serotype O3:K6 (strain RIMD 2210633) GN=rplF PE=3 SV=1                                       | 6.7796102  | 1.88E+01  |          |                     |          | 3.90E+06            | 1.30E+07          |                           |
| Q87SZ9    | 30S ribosomal protein S8 OS=Vibrio parahaemolyticus serotype O3:K6 (strain RIMD 2210633) GN=rpsH PE=3 SV=1                                       | 6.15384615 | 1.40E+01  |          |                     | 6.20E+06 |                     | 1.50E+07          | 1.50E+07                  |
| Q87T01    | 50S ribosomal protein L5 OS=Vibrio parahaemolyticus serotype O3:K6 (strain RIMD 2210633) GN=rplE PE=3 SV=1                                       | 10.6145251 | 2.01E+01  | 2.50E+07 | 1.20E+07            | 2.00E+07 | 1.90E+07            | 2.20E+07          | 2.00E+07                  |
| Q87T02    | 50S ribosomal protein L24 OS=Vibrio parahaemolyticus serotype O3:K6 (strain RIMD 2210633) GN=rplX PE=3 SV=1                                      | 9.52380992 | 1.12E+01  |          |                     |          |                     |                   |                           |
| Q87T03    | 50S ribosomal protein L14 OS=Vibrio parahaemolyticus serotype O3:K6 (strain RIMD 2210633) GN=rplN PE=3 SV=1                                      | 20.3292033 | 1.36E+01  |          |                     |          | 6.40E+06            | 1.30E+07          | 3.20E+06                  |
| Q87T06    | 50S ribosomal protein L16 OS=Vibrio parahaemolyticus serotype O3:K6 (strain RIMD 2210633) GN=rplP PE=3 SV=1                                      | 8.82352941 | 1.55E+01  |          |                     |          | 1.20E+07            | 6.00E+06          |                           |
| Q87T07    | 30S ribosomal protein S3 OS=Vibrio parahaemolyticus serotype O3:K6 (strain RIMD 2210633)                                                         |            |           |          |                     |          |                     |                   |                           |



Table S1

|        |                                                                                                                                                   |             |         |          |          |          |          |          |          |
|--------|---------------------------------------------------------------------------------------------------------------------------------------------------|-------------|---------|----------|----------|----------|----------|----------|----------|
| A7UEM1 | Transhydrogenase alpha subunit (Fragment) OS=Vibrio parahaemolyticus GN=prtA PE=4 SV=1                                                            | 21.6783217  | 15.485  | 6.90E+06 | 2.50E+07 | 1.10E+07 | 1.00E+07 | 7.00E+06 | 7.50E+06 |
| A7UE7  | Protein RecA (Fragment) OS=Vibrio parahaemolyticus GN=recA PE=3 SV=1                                                                              | 42.3668313  | 26.048  | 1.40E+07 | 2.50E+07 | 2.40E+07 | 1.20E+07 | 1.50E+07 | 1.50E+07 |
| A7UEX3 | DNA gyrase beta-subunit (Fragment) OS=Vibrio parahaemolyticus GN=gyrB PE=4 SV=1                                                                   | 11.6751269  | 21.652  | 7.60E+06 | 5.70E+06 | 5.10E+06 | 9.10E+06 | 4.60E+06 | 4.00E+06 |
| A9Q6J2 | Protein RecA (Fragment) OS=Vibrio parahaemolyticus GN=recA PE=3 SV=1                                                                              | 42.1800948  | 22.398  | 1.30E+07 | 2.50E+07 | 2.40E+07 | 1.20E+07 | 1.50E+07 | 1.50E+07 |
| A9Q6M1 | DNA gyrase B subunit (Fragment) OS=Vibrio parahaemolyticus GN=gyrB PE=4 SV=1                                                                      | 13.5294118  | 18.562  | 7.60E+06 | 5.70E+06 | 5.10E+06 | 9.10E+06 | 4.60E+06 | 4.00E+06 |
| A9Q6Q3 | Phosphoglucosyltransferase (Fragment) OS=Vibrio parahaemolyticus GN=pgm PE=3 SV=1                                                                 | 26.5306122  | 21.248  | 1.60E+07 | 1.10E+07 | 2.10E+07 | 2.20E+07 | 2.30E+07 | 2.50E+07 |
| H6BAG3 | Protein RecA (Fragment) OS=Vibrio parahaemolyticus GN=recA PE=3 SV=1                                                                              | 35.0871793  | 18.027  | 1.20E+07 | 2.30E+07 | 2.20E+07 | 7.00E+06 | 1.30E+07 | 1.40E+07 |
| O50286 | Dihydropyridyl dehydrogenase OS=Vibrio parahaemolyticus serotype O3:K6 (strain RIMD 2210633) GN=lpd PE=3 SV=2                                     | 55.7894737  | 50.956  | 5.00E+07 | 5.60E+07 | 5.60E+07 | 5.30E+07 | 6.00E+07 | 4.80E+07 |
| O51859 | DNA gyrase subunit B OS=Vibrio parahaemolyticus serotype O3:K6 (strain RIMD 2210633) GN=gyrB PE=3 SV=2                                            | 5.59006211  | 89.386  | 8.00E+06 | 3.60E+06 | 6.00E+06 | 9.60E+06 | 2.90E+06 | 4.00E+06 |
| POA2W2 | Acyl carrier protein OS=Vibrio parahaemolyticus serotype O3:K6 (strain RIMD 2210633) GN=sacp PE=3 SV=2                                            | 18.1818182  | 8.526   | 1.50E+07 | 1.40E+07 | 1.40E+07 |          | 1.00E+07 | 1.00E+07 |
| POA308 | ATP synthase subunit c OS=Vibrio parahaemolyticus serotype O3:K6 (strain RIMD 2210633) GN=atpC PE=3 SV=1                                          | 33.3333333  | 8.63    | 3.90E+07 | 2.70E+07 | 4.80E+07 |          | 4.00E+07 | 4.00E+07 |
| POA481 | 50S ribosomal protein L20 OS=Vibrio parahaemolyticus serotype O3:K6 (strain RIMD 2210633) GN=rplT PE=3 SV=1                                       | 29.9145299  | 13.376  | 1.80E+07 | 1.70E+07 | 1.80E+07 | 3.70E+07 | 2.80E+07 | 3.10E+07 |
| PZ2095 | Tryptophan synthase alpha chain OS=Vibrio parahaemolyticus serotype O3:K6 (strain RIMD 2210633) GN=trpA PE=3 SV=2                                 | 3.35820896  | 28.583  |          | 2.50E+06 |          |          |          | 2.90E+06 |
| PZ2096 | Anthranyltransferase phosphoribosyltransferase OS=Vibrio parahaemolyticus serotype O3:K6 (strain RIMD 2210633) GN=trpD PE=3 SV=1                  | 3.01204819  | 35.393  |          | 2.50E+06 |          |          |          |          |
| PZ2097 | Tryptophan synthase beta chain 1 OS=Vibrio parahaemolyticus serotype O3:K6 (strain RIMD 2210633) GN=trpB1 PE=3 SV=2                               | 2.27272727  | 42.999  | 6.70E+06 | 9.70E+06 | 7.50E+06 | 7.50E+06 | 1.00E+07 | 7.40E+06 |
| PZ2099 | Anthranyltransferase synthase component 1 OS=Vibrio parahaemolyticus serotype O3:K6 (strain RIMD 2210633) GN=trpE PE=3 SV=2                       | 2.0327172   | 59.733  |          |          | 3.10E+06 | 3.00E+06 | 1.50E+06 |          |
| P40607 | Adenylosuccinate synthetase OS=Vibrio parahaemolyticus serotype O3:K6 (strain RIMD 2210633) GN=psrA PE=3 SV=3                                     | 37.8995434  | 47.663  | 3.20E+07 | 3.30E+07 | 3.20E+07 | 3.40E+07 | 3.20E+07 | 2.40E+07 |
| A40611 | Ribonuclease R OS=Vibrio parahaemolyticus serotype O3:K6 (strain RIMD 2210633) GN=rnc PE=3 SV=2                                                   | 2.75449102  | 94.978  | 1.60E+06 |          |          |          | 3.30E+06 | 2.10E+06 |
| B46234 | Uncharacterized protein VP2110 OS=Vibrio parahaemolyticus serotype O3:K6 (strain RIMD 2210633) GN=VP2110 PE=4 SV=2                                | 3.33333333  | 16.37   |          |          |          | 1.70E+06 |          |          |
| P59494 | Maltoporin OS=Vibrio parahaemolyticus serotype O3:K6 (strain RIMD 2210633) GN=lamb PE=3 SV=1                                                      | 41.2037037  | 46.933  | 1.40E+08 | 6.50E+07 | 1.20E+08 | 1.40E+08 | 1.80E+08 | 8.70E+07 |
| P59562 | UPF0234 protein VP1617 OS=Vibrio parahaemolyticus serotype O3:K6 (strain RIMD 2210633) GN=VP1617 PE=3 SV=1                                        |             | 5.625   | 18.142   | 1.90E+06 | 2.70E+06 |          |          |          |
| P59570 | Outer membrane protein OmpK OS=Vibrio parahaemolyticus serotype O3:K6 (strain RIMD 2210633) GN=sompK PE=3 SV=1                                    | 15.4135338  | 29.857  | 9.80E+06 | 6.20E+06 | 1.00E+07 | 1.50E+07 | 1.30E+07 | 6.10E+06 |
| P59605 | Argininosuccinate synthase OS=Vibrio parahaemolyticus serotype O3:K6 (strain RIMD 2210633) GN=argG PE=3 SV=1                                      | 56.1881188  | 44.489  | 7.50E+07 | 9.20E+07 | 8.40E+07 | 8.90E+07 | 9.70E+07 | 7.00E+07 |
| P59620 | Bifunctional protein ArgH OS=Vibrio parahaemolyticus serotype O3:K6 (strain RIMD 2210633) GN=argH PE=3 SV=1                                       | 21.3141026  | 69.314  | 1.10E+07 | 1.20E+07 | 1.20E+07 | 1.10E+07 | 1.30E+07 | 1.20E+07 |
| P65129 | Translation initiation factor IF-1 OS=Vibrio parahaemolyticus serotype O3:K6 (strain RIMD 2210633) GN=infA PE=3 SV=1                              | 16.6666667  | 8.217   | 9.60E+06 |          | 7.20E+06 | 1.00E+07 |          |          |
| P66346 | 30S ribosomal protein S10 OS=Vibrio parahaemolyticus serotype O3:K6 (strain RIMD 2210633) GN=rpsJ PE=3 SV=1                                       | 33.9805825  | 11.713  | 1.50E+07 | 2.00E+07 | 2.10E+07 | 2.00E+07 | 1.80E+07 | 2.20E+07 |
| P66478 | 30S ribosomal protein S18 OS=Vibrio parahaemolyticus serotype O3:K6 (strain RIMD 2210633) GN=rpsR PE=3 SV=1                                       | 50.6666667  | 8.838   | 4.00E+07 | 4.00E+07 | 4.60E+07 | 6.90E+07 | 5.80E+07 | 5.20E+07 |
| P66533 | 30S ribosomal protein S21 OS=Vibrio parahaemolyticus serotype O3:K6 (strain RIMD 2210633) GN=rpsU PE=3 SV=1                                       | 14.084507   | 8.482   | 2.30E+06 |          | 2.30E+06 |          | 3.60E+06 | 2.80E+06 |
| P74956 | Lon protease OS=Vibrio parahaemolyticus serotype O3:K6 (strain RIMD 2210633) GN=lon PE=3 SV=2                                                     | 24.137931   | 87.757  | 1.80E+07 | 2.30E+07 | 2.20E+07 | 2.10E+07 | 2.10E+07 | 1.60E+07 |
| Q79VY4 | OpR OS=Vibrio parahaemolyticus serotype O3:K6 (strain RIMD 2210633) GN=VP2515 PE=4 SV=1                                                           | 5.88232594  | 23.62   |          |          |          |          | 4.50E+06 |          |
| Q79VY5 | Hydroxanthine ribosyl transferase OS=Vibrio parahaemolyticus serotype O3:K6 (strain RIMD 2210633) GN=VP2515 PE=4 SV=1                             | 7.95454545  | 20.048  |          |          | 1.90E+06 |          |          |          |
| Q79W1  | Flagellar motor switch protein FIG OS=Vibrio parahaemolyticus serotype O3:K6 (strain RIMD 2210633) GN=VP2248 PE=3 SV=1                            | 2.58410256  | 38.641  |          | 2.20E+08 |          |          |          |          |
| Q79YX4 | Chemotaxis protein CheW OS=Vibrio parahaemolyticus serotype O3:K6 (strain RIMD 2210633) GN=VP2225 PE=4 SV=1                                       | 40.8536858  | 18.406  | 3.50E+07 | 4.70E+07 | 4.80E+07 | 1.30E+07 | 1.30E+07 | 2.40E+07 |
| Q79Y93 | BifidA OS=Vibrio parahaemolyticus serotype O3:K6 (strain RIMD 2210633) GN=VP1393 PE=4 SV=1                                                        | 20.3488372  | 18.412  | 2.50E+06 |          | 5.00E+06 |          | 3.20E+06 |          |
| Q877T5 | Elongation factor Tu OS=Vibrio parahaemolyticus serotype O3:K6 (strain RIMD 2210633) GN=urfA PE=3 SV=1                                            | 70.9507614  | 43.125  | 3.30E+08 | 4.60E+08 | 4.30E+08 | 4.10E+08 | 4.30E+08 | 3.90E+08 |
| Q87F8C | ParB family protein OS=Vibrio parahaemolyticus serotype O3:K6 (strain RIMD 2210633) GN=VPA1751 PE=3 SV=1                                          | 3.7037037   | 35.871  | 5.40E+06 | 4.80E+06 | 5.60E+06 | 5.10E+06 | 6.20E+06 | 4.40E+06 |
| Q87F4E | Uncharacterized protein OS=Vibrio parahaemolyticus serotype O3:K6 (strain RIMD 2210633) GN=VPA1735 PE=4 SV=1                                      | 3.13971743  | 72.005  | 2.60E+06 |          |          | 8.30E+06 |          |          |
| Q87F3F | Putative proline dehydrogenase OS=Vibrio parahaemolyticus serotype O3:K6 (strain RIMD 2210633) GN=VPA1726 PE=3 SV=1                               | 0.86289549  | 114.924 |          |          | 2.00E+06 |          |          |          |
| Q87FF4 | Uncharacterized protein OS=Vibrio parahaemolyticus serotype O3:K6 (strain RIMD 2210633) GN=VPA1725 PE=4 SV=1                                      | 5.10638298  | 25.459  | 6.90E+06 | 6.40E+06 | 4.50E+06 | 3.80E+06 | 4.80E+06 |          |
| Q87FL2 | PTS system, glucose-specific IIBC component OS=Vibrio parahaemolyticus serotype O3:K6 (strain RIMD 2210633) GN=VPA1667 PE=4 SV=1                  | 3.95833333  | 51.126  |          |          | 6.70E+06 |          |          | 2.50E+06 |
| Q87FL7 | Putative diaminoimelate decarboxylase protein OS=Vibrio parahaemolyticus serotype O3:K6 (strain RIMD 2210633) GN=VPA1662 PE=3 SV=1                |             | 35.25   | 45.284   | 5.10E+07 | 5.50E+07 | 5.00E+07 | 5.40E+07 | 4.50E+07 |
| Q87FL8 | Putative AcetS OS=Vibrio parahaemolyticus serotype O3:K6 (strain RIMD 2210633) GN=VPA1661 PE=4 SV=1                                               | 36.2889984  | 69.443  | 2.30E+07 | 3.10E+07 | 3.00E+07 | 2.60E+07 | 3.30E+07 | 2.00E+07 |
| Q87FM0 | Uncharacterized protein OS=Vibrio parahaemolyticus serotype O3:K6 (strain RIMD 2210633) GN=VPA1659 PE=4 SV=1                                      | 56.0555738  | 68.729  | 1.70E+08 | 1.80E+08 | 1.70E+08 | 1.70E+08 | 1.70E+08 | 1.50E+08 |
| Q87FM1 | Uncharacterized protein OS=Vibrio parahaemolyticus serotype O3:K6 (strain RIMD 2210633) GN=VPA1658 PE=4 SV=1                                      | 40.4466501  | 44.22   | 1.00E+08 | 1.20E+08 | 1.10E+08 | 1.00E+08 | 1.40E+08 | 8.20E+07 |
| Q87FM2 | Ferric siderophore receptor homolog OS=Vibrio parahaemolyticus serotype O3:K6 (strain RIMD 2210633) GN=VPA1657 PE=3 SV=1                          | 21.8289086  | 74.942  | 2.20E+07 | 9.50E+06 | 2.30E+07 | 2.30E+07 | 2.50E+07 | 2.20E+07 |
| Q87FM3 | Ferric vibrioferrin receptor OS=Vibrio parahaemolyticus serotype O3:K6 (strain RIMD 2210633) GN=VPA1656 PE=3 SV=1                                 | 17.9775281  | 78.834  | 1.50E+07 | 8.50E+06 | 1.70E+07 | 1.50E+07 | 2.30E+07 | 1.30E+07 |
| Q87FN1 | Uncharacterized protein OS=Vibrio parahaemolyticus serotype O3:K6 (strain RIMD 2210633) GN=VPA1648 PE=4 SV=1                                      | 6.20869597  | 62.733  | 3.90E+06 |          | 3.50E+06 | 6.10E+06 | 4.50E+06 | 4.30E+06 |
| Q87FN6 | Putative CymC protein OS=Vibrio parahaemolyticus serotype O3:K6 (strain RIMD 2210633) GN=VPA1642 PE=4 SV=1                                        | 7.14285714  | 18.564  | 5.00E+06 |          |          |          |          |          |
| Q87FN8 | Alpha-1,4 glucan phosphorylase OS=Vibrio parahaemolyticus serotype O3:K6 (strain RIMD 2210633) GN=VPA1620 PE=3 SV=1                               | 31.7013464  | 92.342  | 4.00E+07 | 4.00E+07 | 4.60E+07 | 2.70E+07 | 4.80E+07 | 2.30E+07 |
| Q87FG9 | 4-alpha-glucanotransferase OS=Vibrio parahaemolyticus serotype O3:K6 (strain RIMD 2210633) GN=VPA1619 PE=3 SV=1                                   | 26.3085999  | 81.79   | 1.80E+07 | 1.80E+07 | 2.10E+07 | 2.00E+07 | 2.20E+07 | 1.50E+07 |
| Q87FR0 | 1,4-alpha-glucan branching enzyme G1gB OS=Vibrio parahaemolyticus serotype O3:K6 (strain RIMD 2210633) GN=g1gB PE=3 SV=1                          | 3.17890795  | 87.449  | 8.50E+06 | 1.20E+07 | 1.20E+07 | 8.80E+06 | 4.50E+06 | 6.70E+06 |
| Q87RV6 | Uncharacterized protein OS=Vibrio parahaemolyticus serotype O3:K6 (strain RIMD 2210633) GN=VPA1572 PE=4 SV=1                                      | 3.95978261  | 41.766  | 1.30E+07 | 1.60E+07 | 1.20E+07 | 1.90E+07 | 1.50E+07 | 1.10E+07 |
| Q87RW9 | Uncharacterized protein OS=Vibrio parahaemolyticus serotype O3:K6 (strain RIMD 2210633) GN=VPA1559 PE=4 SV=1                                      | 0.909090909 | 16.427  |          |          | 1.10E+06 |          |          |          |
| Q87R18 | L-lactate dehydrogenase OS=Vibrio parahaemolyticus serotype O3:K6 (strain RIMD 2210633) GN=ldh PE=3 SV=1                                          | 16.0949868  | 41.733  | 1.00E+07 | 3.80E+06 | 1.20E+07 | 4.60E+06 | 8.60E+06 | 5.40E+06 |
| Q87R21 | Prolyl endopeptidase OS=Vibrio parahaemolyticus serotype O3:K6 (strain RIMD 2210633) GN=VPA1496 PE=4 SV=1                                         | 15.5096122  | 76.045  | 6.50E+06 | 1.20E+07 | 1.10E+07 | 1.10E+07 | 1.20E+07 | 9.50E+06 |
| Q87G42 | Purine nucleoside phosphorylase DeoD-type 2 OS=Vibrio parahaemolyticus serotype O3:K6 (strain RIMD 2210633) GN=deoD2 PE=3 SV=1                    | 37.2881356  | 25.654  | 1.50E+07 | 1.90E+07 | 1.70E+07 | 1.90E+07 | 1.50E+07 | 1.30E+07 |
| Q87G48 | Outer membrane lipoprotein OS=Vibrio parahaemolyticus serotype O3:K6 (strain RIMD 2210633) GN=VPA1469 PE=4 SV=1                                   | 28.5714286  | 8.665   | 7.60E+06 |          |          | 8.00E+06 | 7.60E+06 | 7.80E+06 |
| Q87G77 | Uncharacterized protein OS=Vibrio parahaemolyticus serotype O3:K6 (strain RIMD 2210633) GN=VPA1440 PE=3 SV=1                                      | 5.64784053  | 34.37   |          |          | 5.60E+06 |          |          |          |
| Q87G89 | Azurin OS=Vibrio parahaemolyticus serotype O3:K6 (strain RIMD 2210633) GN=VPA1428 PE=4 SV=1                                                       | 70.6666667  | 15.819  | 5.50E+07 | 8.20E+07 | 5.10E+07 | 5.60E+07 | 4.90E+07 | 3.80E+07 |
| Q87GA0 | Putative glutathione S-transferase family protein OS=Vibrio parahaemolyticus serotype O3:K6 (strain RIMD 2210633) GN=VPA1417 PE=3 SV=1            | 31.2195122  | 23.565  | 1.10E+07 | 1.50E+07 | 1.50E+07 | 1.50E+07 | 1.30E+07 | 1.60E+07 |
| Q87GB5 | Maltose/maltodextrin import ATP-binding protein MalK OS=Vibrio parahaemolyticus serotype O3:K6 (strain RIMD 2210633) GN=malK PE=3 SV=1            | 2.68817204  | 41.131  |          |          | 7.30E+06 |          |          |          |
| Q87GB6 | Maltose ABC transporter, periplasmic maltose-binding protein OS=Vibrio parahaemolyticus serotype O3:K6 (strain RIMD 2210633) GN=VPA1401 PE=4 SV=1 | 73.4693878  | 42.1    | 1.50E+08 | 1.60E+08 | 1.40E+08 | 1.50E+08 | 1.40E+08 | 1.10E+08 |
| Q87GC0 | Acyl-CoA thioester hydrolase-related protein OS=Vibrio parahaemolyticus serotype O3:K6 (strain RIMD 2210633) GN=VPA1397 PE=4 SV=1                 | 47.826087   | 17.67   | 4.10E+07 | 3.90E+07 | 4.40E+07 | 5.40E+07 | 6.00E+07 | 3.60E+07 |
| Q87GK7 | Uncharacterized protein OS=Vibrio parahaemolyticus serotype O3:K6 (strain RIMD 2210633) GN=VPA1308 PE=4 SV=1                                      | 13.9473684  | 42.312  | 1.50E+07 | 6.80E+06 | 1.70E+07 | 2.00E+07 | 2.30E+07 | 1.40E+07 |
| Q87GL1 | Putative 3'-oxoacyl-(Acyl carrier protein) reductase OS=Vibrio parahaemolyticus serotype O3:K6 (strain RIMD 2210633) GN=VPA1304 PE=3 SV=1         | 11.2970711  | 25.224  | 1.40E+07 |          | 1.40E+07 |          | 2.20E+07 |          |
| Q87GL7 | Putative glutathione S-transferase OS=Vibrio parahaemolyticus serotype O3:K6 (strain RIMD 2210633) GN=VPA1298 PE=4 SV=1                           | 18.9473684  | 32.188  | 1.20E+07 | 8.00E+06 |          | 8.00E+06 | 7.60E+06 | 1.10E+07 |
| Q87GM2 | Putative antioxidant OS=Vibrio parahaemolyticus serotype O3:K6 (strain RIMD 2210633) GN=VPA1293 PE=4 SV=1                                         | 9.55414013  | 16.468  | 5.00E+06 | 8.20E+06 |          |          |          |          |
| Q87GT5 | Glyceroldehyde-3-phosphate dehydrogenase OS=Vibrio parahaemolyticus serotype O3:K6 (strain RIMD 2210633) GN=VPA1230 PE=3 SV=1                     | 26.8343816  | 52.271  | 2.50E+07 | 2.70E+07 | 9.70E+06 | 1.90E+07 | 1.50E+07 | 1.30E+07 |
| Q87GT9 | UPF0265 protein VPA1226 OS=Vibrio parahaemolyticus serotype O3:K6 (strain RIMD 2210633) GN=VPA1226 PE=3 SV=1                                      | 11.5384615  | 12.401  |          |          |          |          |          | 4.60E+06 |
| Q87GW0 | Acetoacetyl-CoA reductase OS=Vibrio parahaemolyticus serotype O3:K6 (strain RIMD 2210633) GN=VPA1205 PE=3 SV=1                                    | 13.0081301  | 26.215  | 1.70E+07 | 1.10E+07 | 2.10E+07 | 1.30E+07 | 1.70E+07 | 1.20E+07 |
| Q87GW1 | Acetyl-CoA acetyltransferase OS=Vibrio parahaemolyticus serotype O3:K6 (strain RIMD 2210633) GN=VPA1204 PE=3 SV=1                                 | 24.1293532  | 41.487  | 1.10E+07 | 1.20E+07 | 1.40E+07 |          | 2.10E+07 | 8.80E+06 |
| Q87GX  |                                                                                                                                                   |             |         |          |          |          |          |          |          |

|        |                                                                                                                                                   |             |         |          |          |          |          |          |          |  |
|--------|---------------------------------------------------------------------------------------------------------------------------------------------------|-------------|---------|----------|----------|----------|----------|----------|----------|--|
| Q87L1  | ATP-binding component of molybdate transport system OS=Vibrio parahaemolyticus serotype O3K6 (strain RIMD 2210633) GN=VPA0595 PE=4 SV=1           | 1.65289256  | 55.367  |          |          | 1.60E+07 |          |          | 1.80E+07 |  |
| Q87M1  | Tryptophan synthase beta chain 2 OS=Vibrio parahaemolyticus serotype O3K6 (strain RIMD 2210633) GN=trpB2 PE=3 SV=1                                | 12.2850123  | 44.222  | 9.90E+06 | 1.00E+07 | 7.80E+06 | 1.10E+07 | 8.10E+06 | 7.00E+06 |  |
| Q87P0  | Alcohol dehydrogenase OS=Vibrio parahaemolyticus serotype O3K6 (strain RIMD 2210633) GN=VPA0566 PE=4 SV=1                                         | 29.3193717  | 40.204  | 4.10E+07 | 3.10E+07 | 1.80E+07 | 1.30E+07 | 1.80E+07 | 1.30E+07 |  |
| Q87P4  | Putative chemotaxis transducer OS=Vibrio parahaemolyticus serotype O3K6 (strain RIMD 2210633) GN=VPA0562 PE=4 SV=1                                | 0.88325294  | 73.916  | 3.90E+07 | 4.00E+07 | 5.00E+07 | 5.30E+07 | 6.20E+07 | 5.10E+07 |  |
| Q87Q4  | Cold shock DNA-binding domain protein OS=Vibrio parahaemolyticus serotype O3K6 (strain RIMD 2210633) GN=VPA0552 PE=4 SV=1                         | 36.2318841  | 7.544   | 2.70E+07 | 2.90E+07 | 3.20E+07 | 3.30E+07 | 3.60E+07 | 2.60E+07 |  |
| Q87S1  | Putative phosphonmannanase OS=Vibrio parahaemolyticus serotype O3K6 (strain RIMD 2210633) GN=VPA0535 PE=3 SV=1                                    | 40.7801418  | 61.622  | 3.30E+07 | 3.90E+07 | 3.30E+07 | 3.70E+07 | 2.90E+07 | 3.20E+07 |  |
| Q87T2  | Spermidine N1-acetyltransferase OS=Vibrio parahaemolyticus serotype O3K6 (strain RIMD 2210633) GN=VPA0474 PE=4 SV=1                               | 8.52272727  | 21.118  |          | 5.00E+06 |          |          |          |          |  |
| Q87T8  | Prolyl endopeptidase OS=Vibrio parahaemolyticus serotype O3K6 (strain RIMD 2210633) GN=VPA0468 PE=4 SV=1                                          | 2.62519899  | 84.193  |          | 1.10E+07 | 9.10E+06 | 1.00E+07 | 1.10E+07 | 5.30E+06 |  |
| Q87T0  | Universal stress protein OS=Vibrio parahaemolyticus serotype O3K6 (strain RIMD 2210633) GN=VPA0466 PE=3 SV=1                                      | 5.8106383   | 16.344  | 6.20E+06 | 1.60E+07 | 1.10E+07 | 1.40E+07 | 7.80E+06 | 1.10E+07 |  |
| Q87J02 | Catalase-peroxidase 1 OS=Vibrio parahaemolyticus serotype O3K6 (strain RIMD 2210633) GN=katG1 PE=3 SV=1                                           | 1.66435506  | 80.435  | 3.80E+07 |          |          |          |          |          |  |
| Q87J24 | Uncharacterized protein OS=Vibrio parahaemolyticus serotype O3K6 (strain RIMD 2210633) GN=VPA0429 PE=4 SV=1                                       | 6.81818182  | 20.192  | 1.50E+07 | 2.60E+07 | 2.50E+07 | 2.20E+07 | 1.60E+07 | 1.30E+07 |  |
| Q87J25 | Uncharacterized protein OS=Vibrio parahaemolyticus serotype O3K6 (strain RIMD 2210633) GN=VPA0428 PE=4 SV=1                                       | 16.374289   | 19.051  | 8.40E+06 | 1.00E+07 |          |          |          | 4.10E+06 |  |
| Q87J26 | Coproporphyrinogen oxidase homolog PhuW OS=Vibrio parahaemolyticus serotype O3K6 (strain RIMD 2210633) GN=VPA0427 PE=4 SV=1                       | 10.5263158  | 50.44   | 6.00E+06 | 9.50E+06 | 6.00E+06 | 8.70E+06 | 8.20E+06 | 7.60E+06 |  |
| Q87J30 | Hemin ABC transporter, periplasmic hemin-binding protein HutB OS=Vibrio parahaemolyticus serotype O3K6 (strain RIMD 2210633) GN=VPA0423 PE=4 SV=1 | 10.3806228  | 30.31   | 4.60E+06 | 5.00E+06 | 4.60E+06 | 5.60E+06 | 5.30E+06 | 5.30E+06 |  |
| Q87J33 | LuxI OS=Vibrio parahaemolyticus serotype O3K6 (strain RIMD 2210633) GN=VPA0420 PE=1 SV=1                                                          | 24.1830065  | 17.491  | 6.30E+06 | 1.00E+07 | 8.50E+06 | 8.10E+06 | 5.70E+06 | 6.10E+06 |  |
| Q87J41 | NH3-dependent NAD(+) synthetase OS=Vibrio parahaemolyticus serotype O3K6 (strain RIMD 2210633) GN=nadE PE=3 SV=1                                  | 5.07246377  | 30.21   | 8.20E+06 |          | 7.40E+06 |          |          | 8.00E+06 |  |
| Q87J54 | Putative aminotransferase OS=Vibrio parahaemolyticus serotype O3K6 (strain RIMD 2210633) GN=VPA0399 PE=4 SV=1                                     | 1.83246073  | 42.13   | 2.60E+06 |          |          |          |          |          |  |
| Q87J78 | Adenylyl succinate synthetase OS=Vibrio parahaemolyticus serotype O3K6 (strain RIMD 2210633) GN=psuA PE=3 SV=1                                    | 3.3492823   | 45.624  | 5.90E+06 | 4.40E+06 |          |          | 6.90E+06 | 6.20E+06 |  |
| Q87J81 | Phosphoenolpyruvate synthase OS=Vibrio parahaemolyticus serotype O3K6 (strain RIMD 2210633) GN=VPA0372 PE=3 SV=1                                  | 54.2138365  | 88.088  | 1.30E+08 | 1.50E+08 | 1.10E+08 | 1.20E+08 | 1.10E+08 | 7.70E+07 |  |
| Q87J86 | Putrescine-binding periplasmic protein OS=Vibrio parahaemolyticus serotype O3K6 (strain RIMD 2210633) GN=VPA0367 PE=3 SV=1                        | 22.9651163  | 38.671  | 2.50E+07 | 2.10E+07 | 2.20E+07 | 2.40E+07 | 2.50E+07 | 1.80E+07 |  |
| Q87J05 | Putative outer membrane protein OmpV OS=Vibrio parahaemolyticus serotype O3K6 (strain RIMD 2210633) GN=VPA0318 PE=4 SV=1                          | 4.65118279  | 28.131  | 1.10E+07 |          | 1.10E+07 | 1.60E+07 | 1.60E+07 | 9.70E+06 |  |
| Q87JF1 | Uncharacterized protein OS=Vibrio parahaemolyticus serotype O3K6 (strain RIMD 2210633) GN=VPA0302 PE=4 SV=1                                       | 6.97674419  | 14.722  |          |          |          |          |          | 2.00E+06 |  |
| Q87JG6 | 60 kDa chaperonin 2 OS=Vibrio parahaemolyticus serotype O3K6 (strain RIMD 2210633) GN=groL2 PE=3 SV=1                                             | 9.58646617  | 56.31   |          | 8.10E+06 | 6.50E+06 | 1.70E+07 | 5.30E+06 | 4.20E+06 |  |
| Q87JN8 | Uncharacterized protein OS=Vibrio parahaemolyticus serotype O3K6 (strain RIMD 2210633) GN=VPA0210 PE=4 SV=1                                       | 27.2727273  | 8.694   |          |          |          |          |          |          |  |
| Q87JF8 | Phospho-beta-glucosidase B OS=Vibrio parahaemolyticus serotype O3K6 (strain RIMD 2210633) GN=VPA0180 PE=3 SV=1                                    | 10.7991361  | 52.96   | 4.70E+06 | 9.30E+06 | 4.10E+06 | 8.70E+06 | 6.20E+06 | 1.50E+06 |  |
| Q87J58 | Biosynthetic arginine decarboxylase OS=Vibrio parahaemolyticus serotype O3K6 (strain RIMD 2210633) GN=speA PE=3 SV=1                              | 6.46025     | 72.02   | 8.20E+06 | 5.80E+06 | 8.80E+06 | 1.00E+07 | 5.70E+06 | 4.50E+06 |  |
| Q87J59 | Agmatase OS=Vibrio parahaemolyticus serotype O3K6 (strain RIMD 2210633) GN=VPA0169 PE=3 SV=1                                                      | 5.55555556  | 33.374  |          | 2.00E+06 |          |          |          |          |  |
| Q87J72 | Putative outer membrane protein OS=Vibrio parahaemolyticus serotype O3K6 (strain RIMD 2210633) GN=VPA0166 PE=4 SV=1                               | 14.0401146  | 37.95   | 5.20E+07 | 3.30E+07 | 4.40E+07 | 5.60E+07 | 5.90E+07 | 3.40E+07 |  |
| Q87JU6 | Biopolymer transport protein ExbB-related protein OS=Vibrio parahaemolyticus serotype O3K6 (strain RIMD 2210633) GN=VPA0152 PE=3 SV=1             | 3.07692308  | 49.17   |          |          | 4.10E+06 |          |          |          |  |
| Q87JV4 | D-lactate dehydrogenase OS=Vibrio parahaemolyticus serotype O3K6 (strain RIMD 2210633) GN=VPA0144 PE=3 SV=1                                       | 12.6888218  | 36.686  | 8.00E+06 | 5.80E+07 | 1.00E+07 |          | 1.50E+07 |          |  |
| Q87JW9 | Putative PmbA-related protein OS=Vibrio parahaemolyticus serotype O3K6 (strain RIMD 2210633) GN=VPA0139 PE=4 SV=1                                 | 2.9082774   | 47.661  | 5.50E+06 | 6.00E+06 |          |          | 5.60E+06 |          |  |
| Q87JW5 | Putative ABC transporter substrate-binding protein OS=Vibrio parahaemolyticus serotype O3K6 (strain RIMD 2210633) GN=VPA0133 PE=4 SV=1            | 8.86075949  | 34.726  |          | 1.10E+07 | 5.30E+06 | 7.90E+06 | 7.40E+06 | 3.50E+06 |  |
| Q87JW6 | Putative transcriptional activator OS=Vibrio parahaemolyticus serotype O3K6 (strain RIMD 2210633) GN=VPA0132 PE=4 SV=1                            | 3.18181818  | 24.852  |          |          | 9.40E+06 |          |          |          |  |
| Q87JW7 | Hydroxyethylthiolase kinase OS=Vibrio parahaemolyticus serotype O3K6 (strain RIMD 2210633) GN=thiM PE=3 SV=1                                      | 13.3079848  | 27.713  | 3.70E+06 | 1.40E+07 | 9.70E+06 | 1.10E+07 |          |          |  |
| Q87K02 | Outer membrane protein OmpW OS=Vibrio parahaemolyticus serotype O3K6 (strain RIMD 2210633) GN=VPA0096 PE=4 SV=1                                   | 6.54205607  | 23.453  | 1.90E+07 | 8.70E+06 | 1.50E+07 | 4.80E+06 | 2.20E+07 | 1.30E+07 |  |
| Q87K60 | Glucosamine-6-phosphate deaminase OS=Vibrio parahaemolyticus serotype O3K6 (strain RIMD 2210633) GN=mgdB PE=3 SV=1                                | 41.3533835  | 29.639  |          | 2.80E+07 | 1.50E+07 | 5.30E+07 | 2.30E+07 | 2.50E+07 |  |
| Q87K87 | Probable transcriptional regulatory protein VPA0011 OS=Vibrio parahaemolyticus serotype O3K6 (strain RIMD 2210633) GN=VPA0011 PE=3 SV=1           | 12.1848739  | 26.137  | 4.70E+06 | 4.30E+06 | 5.10E+06 | 3.60E+06 | 3.50E+06 | 4.10E+06 |  |
| Q87K95 | Peptide ABC transporter, ATP-binding protein OS=Vibrio parahaemolyticus serotype O3K6 (strain RIMD 2210633) GN=VPA0003 PE=3 SV=1                  | 7.09677419  | 34.85   |          | 5.10E+06 |          |          | 3.00E+06 |          |  |
| Q87KA4 | ATP synthase subunit b OS=Vibrio parahaemolyticus serotype O3K6 (strain RIMD 2210633) GN=atpF PE=3 SV=1                                           | 43.5897436  | 17.549  | 1.00E+07 | 3.80E+06 | 1.10E+07 | 8.80E+06 | 9.90E+06 | 6.00E+06 |  |
| Q87KA5 | ATP synthase subunit delta OS=Vibrio parahaemolyticus serotype O3K6 (strain RIMD 2210633) GN=atpH PE=3 SV=1                                       | 8.47457627  | 19.405  |          |          |          | 4.20E+06 | 3.40E+06 |          |  |
| Q87KA6 | ATP synthase subunit alpha OS=Vibrio parahaemolyticus serotype O3K6 (strain RIMD 2210633) GN=atpA PE=3 SV=1                                       | 63.4799235  | 56.601  | 1.00E+08 | 1.20E+08 | 1.20E+08 | 1.10E+08 | 1.10E+08 | 6.10E+08 |  |
| Q87KA7 | ATP synthase gamma chain OS=Vibrio parahaemolyticus serotype O3K6 (strain RIMD 2210633) GN=atpG PE=3 SV=1                                         | 48.61111111 | 31.839  | 2.10E+07 | 2.50E+07 | 2.40E+07 | 2.40E+07 | 1.90E+07 | 2.10E+07 |  |
| Q87KA8 | ATP synthase subunit beta OS=Vibrio parahaemolyticus serotype O3K6 (strain RIMD 2210633) GN=atpD PE=3 SV=1                                        | 35.5104983  | 50.684  | 9.80E+07 | 1.00E+08 | 9.50E+07 | 8.20E+07 | 8.80E+07 | 8.70E+07 |  |
| Q87KB5 | L-threonine dehydratase OS=Vibrio parahaemolyticus serotype O3K6 (strain RIMD 2210633) GN=thiA PE=3 SV=1                                          | 14.95145663 | 56.588  | 8.70E+06 | 1.20E+07 | 6.60E+06 | 1.30E+07 | 9.10E+06 | 7.10E+06 |  |
| Q87KB6 | Dihydroxy-acid dehydratase OS=Vibrio parahaemolyticus serotype O3K6 (strain RIMD 2210633) GN=hdv PE=3 SV=1                                        | 42.903752   | 65.605  | 2.90E+07 | 4.40E+07 | 3.50E+07 | 4.40E+07 | 3.70E+07 | 3.20E+07 |  |
| Q87KB7 | Branched-chain amino acid aminotransferase OS=Vibrio parahaemolyticus serotype O3K6 (strain RIMD 2210633) GN=VP3060 PE=3 SV=1                     | 23.7179487  | 34.277  | 3.20E+07 | 3.40E+07 | 3.10E+07 | 3.80E+07 | 3.00E+07 | 3.20E+07 |  |
| Q87KB9 | Acetolactate synthase OS=Vibrio parahaemolyticus serotype O3K6 (strain RIMD 2210633) GN=VP3058 PE=3 SV=1                                          | 2.73722628  | 59.194  |          | 1.40E+07 |          |          | 1.80E+07 | 6.70E+06 |  |
| Q87KC3 | Thiol-disulfide interchange protein OS=Vibrio parahaemolyticus serotype O3K6 (strain RIMD 2210633) GN=VP3054 PE=3 SV=1                            | 10          | 22.805  | 4.70E+06 | 6.00E+06 | 6.60E+06 | 5.20E+06 | 5.20E+06 | 5.00E+06 |  |
| Q87KE1 | N5-carboxyminoimidazole ribonucleotide mutase OS=Vibrio parahaemolyticus serotype O3K6 (strain RIMD 2210633) GN=purE PE=3 SV=1                    | 8.07453416  | 16.588  | 4.90E+06 |          |          | 6.90E+06 |          |          |  |
| Q87KF0 | Phosphomethylpyrimidine synthase OS=Vibrio parahaemolyticus serotype O3K6 (strain RIMD 2210633) GN=thiC PE=3 SV=1                                 | 2.16718266  | 72.431  | 1.70E+06 | 1.80E+06 |          |          | 1.80E+06 |          |  |
| Q87KF6 | Aminopeptidase P OS=Vibrio parahaemolyticus serotype O3K6 (strain RIMD 2210633) GN=VP3021 PE=4 SV=1                                               | 4.02684564  | 65.515  | 2.40E+06 | 5.60E+06 |          | 8.30E+06 | 5.60E+06 |          |  |
| Q87G4  | DNA helicase OS=Vibrio parahaemolyticus serotype O3K6 (strain RIMD 2210633) GN=VP3013 PE=4 SV=1                                                   | 0.82872928  | 82.398  |          |          | 3.00E+06 | 1.30E+06 |          |          |  |
| Q87KH7 | Transcription termination factor Rho OS=Vibrio parahaemolyticus serotype O3K6 (strain RIMD 2210633) GN=rho PE=3 SV=1                              | 9.06921241  | 46.789  |          | 5.80E+06 |          |          | 8.90E+06 | 6.10E+06 |  |
| Q87K9  | Porphobilinogen deaminase OS=Vibrio parahaemolyticus serotype O3K6 (strain RIMD 2210633) GN=hemC PE=3 SV=1                                        | 3.52564103  | 34.093  | 7.50E+06 |          | 6.50E+06 |          | 7.40E+06 |          |  |
| Q87KJ3 | Diaminopimelate decarboxylase OS=Vibrio parahaemolyticus serotype O3K6 (strain RIMD 2210633) GN=lysA PE=3 SV=1                                    | 27.5779376  | 45.861  | 7.50E+06 | 1.20E+07 | 7.80E+06 | 1.30E+07 | 1.10E+07 | 7.70E+06 |  |
| Q87KP9 | Transcription termination/antitermination protein NusG OS=Vibrio parahaemolyticus serotype O3K6 (strain RIMD 2210633) GN=nusG PE=3 SV=2           | 5.49450549  | 20.696  |          |          |          | 1.10E+07 |          |          |  |
| Q87KQ0 | 50S ribosomal protein L11 OS=Vibrio parahaemolyticus serotype O3K6 (strain RIMD 2210633) GN=rplK PE=3 SV=1                                        | 40.8450704  | 14.693  | 3.40E+07 | 8.10E+07 | 7.60E+07 | 8.70E+07 | 7.90E+07 | 7.40E+07 |  |
| Q87KQ1 | 50S ribosomal protein L10 OS=Vibrio parahaemolyticus serotype O3K6 (strain RIMD 2210633) GN=rplA PE=3 SV=1                                        | 62.6609442  | 24.676  | 7.00E+07 | 7.80E+07 | 9.80E+07 | 9.30E+07 | 9.40E+07 | 7.70E+07 |  |
| Q87KQ2 | 50S ribosomal protein L10 OS=Vibrio parahaemolyticus serotype O3K6 (strain RIMD 2210633) GN=rplA PE=3 SV=1                                        | 36.4197531  | 17.333  | 9.30E+06 |          |          | 5.70E+06 | 9.60E+06 |          |  |
| Q87KQ3 | 50S ribosomal protein L7/L12 OS=Vibrio parahaemolyticus serotype O3K6 (strain RIMD 2210633) GN=rplL PE=3 SV=1                                     | 29.5081967  | 12.184  | 2.70E+07 | 3.20E+07 | 3.70E+07 | 3.30E+07 | 3.90E+07 | 3.40E+07 |  |
| Q87KQ4 | DNA-directed RNA polymerase subunit beta OS=Vibrio parahaemolyticus serotype O3K6 (strain RIMD 2210633) GN=rpoB PE=3 SV=1                         | 42.3994039  | 149.46  | 3.00E+07 | 3.50E+07 | 3.40E+07 | 3.30E+07 | 3.60E+07 | 3.00E+07 |  |
| Q87KQ5 | DNA-directed RNA polymerase subunit beta' OS=Vibrio parahaemolyticus serotype O3K6 (strain RIMD 2210633) GN=rpoC PE=3 SV=1                        | 38.3571429  | 154.822 | 2.90E+07 | 4.00E+07 | 4.20E+07 | 4.40E+07 | 3.00E+07 | 3.00E+07 |  |
| Q87K06 | Regulator of sigma D OS=Vibrio parahaemolyticus serotype O3K6 (strain RIMD 2210633) GN=VP2920 PE=3 SV=1                                           | 9.81595902  | 18.603  | 1.30E+07 |          | 1.70E+07 | 1.60E+07 | 1.50E+07 | 1.00E+07 |  |
| Q87KR5 | DNA-binding protein HU-2 OS=Vibrio parahaemolyticus serotype O3K6 (strain RIMD 2210633) GN=VP2911 PE=3 SV=1                                       | 63.7362637  | 9.562   | 8.00E+07 | 1.10E+08 | 1.10E+08 | 1.30E+08 | 1.00E+08 | 1.00E+08 |  |
| Q87KS6 | Uncharacterized protein OS=Vibrio parahaemolyticus serotype O3K6 (strain RIMD 2210633) GN=VP2900 PE=4 SV=1                                        | 6.8         | 57.103  | 1.70E+06 |          |          | 2.70E+06 |          |          |  |
| Q87KS8 | Phosphoribosylamine-glycine ligase OS=Vibrio parahaemolyticus serotype O3K6 (strain RIMD 2210633) GN=purD PE=3 SV=1                               | 2.0979021   | 45.762  |          | 3.90E+06 |          |          |          |          |  |
| Q87KT0 | Bifunctional purine biosynthesis protein PurH OS=Vibrio parahaemolyticus serotype O3K6 (strain RIMD 2210633) GN=purH PE=3 SV=1                    | 14.9056604  | 57.285  | 7.30E+06 | 1.20E+07 | 1.60E+07 | 1.30E+07 | 1.70E+07 | 1.10E+07 |  |
| Q87KU4 | Acetyl-CoA carboxylase, biotin carboxylase OS=Vibrio parahaemolyticus serotype O3K6 (strain RIMD 2210633) GN=VP2881 PE=4 SV=1                     | 35.3457662  | 49.161  | 1.60E+07 | 1.90E+07 | 1.90E+07 | 1.60E+07 | 2.00E+07 | 1.80E+07 |  |
| Q87KU7 | Acetyl-coenzyme A synthetase OS=Vibrio parahaemolyticus serotype O3K6 (strain RIMD 2210633) GN=accA PE=3 SV=1                                     | 33.8481538  | 71.702  | 7.30E+07 | 6.80E+07 | 4.90E+07 | 5.50E+07 | 4.80E+07 | 5.90E+07 |  |
| Q87KV2 | Fumarate                                                                                                                                          |             |         |          |          |          |          |          |          |  |



Table S1

|        |                                                                                                                                                          |            |         |          |          |          |          |          |          |
|--------|----------------------------------------------------------------------------------------------------------------------------------------------------------|------------|---------|----------|----------|----------|----------|----------|----------|
| Q87L96 | Aspartokinase OS=Vibrio parahaemolyticus serotype O3:K6 (strain RIMD 2210633) GN=VP2715 PE=3 SV=1                                                        | 20.2222222 | 48.777  | 8.40E+06 | 2.10E+07 | 1.30E+07 | 1.90E+07 | 1.20E+07 | 1.30E+07 |
| Q87L98 | Aminotransferase, class V OS=Vibrio parahaemolyticus serotype O3:K6 (strain RIMD 2210633) GN=VP2714 PE=3 SV=1                                            | 11.5281501 | 40.759  | 6.90E+06 | 1.20E+07 |          |          |          | 7.20E+06 |
| Q87LA1 | UTP-glucose-1-phosphate uridylyltransferase OS=Vibrio parahaemolyticus serotype O3:K6 (strain RIMD 2210633) GN=VP2711 PE=3 SV=1                          | 7.5862699  | 32.317  |          | 6.50E+06 |          |          | 3.30E+06 |          |
| Q87LA3 | Single-stranded DNA-binding protein OS=Vibrio parahaemolyticus serotype O3:K6 (strain RIMD 2210633) GN=ssb PE=3 SV=1                                     | 13.6383636 | 19.551  |          | 1.20E+07 | 9.70E+06 | 2.00E+07 | 1.00E+07 |          |
| Q87LB4 | Putative V10 pilin OS=Vibrio parahaemolyticus serotype O3:K6 (strain RIMD 2210633) GN=VP2898 PE=4 SV=1                                                   | 31.5115115 | 16.796  | 1.80E+07 | 1.20E+07 | 2.80E+07 | 2.40E+07 | 2.00E+07 | 2.50E+07 |
| Q87LE1 | Putative sigma-54 modulation protein OS=Vibrio parahaemolyticus serotype O3:K6 (strain RIMD 2210633) GN=VP2671 PE=4 SV=1                                 | 13.6842105 | 11.023  | 1.70E+07 | 2.50E+07 | 2.20E+07 |          | 1.50E+07 | 1.40E+07 |
| Q87LF6 | Uncharacterized protein OS=Vibrio parahaemolyticus serotype O3:K6 (strain RIMD 2210633) GN=VP2856 PE=4 SV=1                                              | 12.4031008 | 13.792  | 5.10E+06 |          | 4.80E+06 | 4.40E+06 | 5.80E+06 | 3.50E+06 |
| Q87LF7 | Aspartate carbamoyltransferase regulatory chain OS=Vibrio parahaemolyticus serotype O3:K6 (strain RIMD 2210633) GN=pyrI PE=3 SV=1                        | 8.49673203 | 17.394  |          |          |          | 7.40E+06 | 7.50E+06 |          |
| Q87LF8 | Aspartate carbamoyltransferase OS=Vibrio parahaemolyticus serotype O3:K6 (strain RIMD 2210633) GN=pyrB PE=3 SV=1                                         | 12.6213592 | 34.474  |          | 3.40E+06 | 5.50E+06 | 4.30E+06 | 4.80E+06 |          |
| Q87LF9 | Ornithine carbamoyltransferase OS=Vibrio parahaemolyticus serotype O3:K6 (strain RIMD 2210633) GN=orfF PE=3 SV=1                                         | 38.6227545 | 37.321  | 3.50E+07 | 4.10E+07 | 3.80E+07 | 4.90E+07 | 2.60E+07 | 3.20E+07 |
| Q87LG6 | Valine-tRNA ligase OS=Vibrio parahaemolyticus serotype O3:K6 (strain RIMD 2210633) GN=valS PE=3 SV=1                                                     | 2.63613445 | 108.553 | 4.60E+06 |          | 8.80E+06 | 5.80E+06 | 6.20E+06 | 3.80E+06 |
| Q87LG8 | Probable cytosol aminopeptidase OS=Vibrio parahaemolyticus serotype O3:K6 (strain RIMD 2210633) GN=pepA PE=3 SV=1                                        | 54.444     | 54.444  | 1.10E+07 | 1.60E+07 | 1.40E+07 | 7.20E+06 | 1.40E+07 | 9.20E+06 |
| Q87LH4 | Deacetylase DA1 OS=Vibrio parahaemolyticus serotype O3:K6 (strain RIMD 2210633) GN=VP2638 PE=4 SV=1                                                      | 12.1030445 | 47.005  |          |          |          |          | 1.30E+07 | 1.30E+07 |
| Q87LH6 | Permease IIC component OS=Vibrio parahaemolyticus serotype O3:K6 (strain RIMD 2210633) GN=VP2636 PE=4 SV=1                                               | 12.3042506 | 48.725  |          |          |          |          | 2.70E+07 | 1.40E+07 |
| Q87LH7 | PTS system, cellobiose-specific IIA component OS=Vibrio parahaemolyticus serotype O3:K6 (strain RIMD 2210633) GN=VP2635 PE=4 SV=1                        | 48.5436993 | 11.624  |          |          |          |          | 2.50E+07 | 1.70E+07 |
| Q87LH8 | 6-phospho-beta-glucosidase OS=Vibrio parahaemolyticus serotype O3:K6 (strain RIMD 2210633) GN=VP2634 PE=3 SV=1                                           | 54.0909891 | 48.304  |          |          |          |          | 1.40E+08 | 6.20E+07 |
| Q87LH9 | Carbohydrate deacetylase OS=Vibrio parahaemolyticus serotype O3:K6 (strain RIMD 2210633) GN=VP2633 PE=3 SV=1                                             | 13.1474104 | 28.013  |          |          |          |          | 1.60E+07 | 6.20E+06 |
| Q87LI0 | Transcriptional regulator, LacI family OS=Vibrio parahaemolyticus serotype O3:K6 (strain RIMD 2210633) GN=VP2632 PE=4 SV=1                               | 3.27380952 | 37.699  |          |          |          |          | 7.80E+06 |          |
| Q87LJ5 | Pyrrroline-5-carboxylate reductase OS=Vibrio parahaemolyticus serotype O3:K6 (strain RIMD 2210633) GN=prc PE=3 SV=1                                      | 4.41176471 | 29.086  |          | 7.70E+06 |          | 6.00E+06 | 7.50E+06 |          |
| Q87LK1 | Glutathione synthetase OS=Vibrio parahaemolyticus serotype O3:K6 (strain RIMD 2210633) GN=gshB PE=3 SV=1                                                 | 22.1518987 | 35.218  | 1.40E+07 | 1.10E+07 | 1.50E+07 | 1.30E+07 | 2.20E+07 | 1.60E+07 |
| Q87LK2 | Ribosomal RNA small subunit methyltransferase E OS=Vibrio parahaemolyticus serotype O3:K6 (strain RIMD 2210633) GN=VP2610 PE=3 SV=1                      | 12.345679  | 27.184  |          |          |          |          | 3.80E+06 | 2.60E+06 |
| Q87LK6 | S-adenosylmethionine synthase OS=Vibrio parahaemolyticus serotype O3:K6 (strain RIMD 2210633) GN=metK PE=3 SV=1                                          | 24.4791667 | 41.964  | 1.10E+07 | 1.40E+07 | 1.60E+07 | 1.50E+07 | 1.50E+07 | 1.20E+07 |
| Q87LK8 | Transketolase 1 OS=Vibrio parahaemolyticus serotype O3:K6 (strain RIMD 2210633) GN=tkt1 PE=3 SV=1                                                        | 31.626506  | 71.985  | 2.20E+07 | 2.60E+07 | 2.40E+07 | 2.10E+07 | 1.60E+07 | 2.30E+07 |
| Q87LL1 | Phosphoglycerate kinase OS=Vibrio parahaemolyticus serotype O3:K6 (strain RIMD 2210633) GN=pgk PE=3 SV=1                                                 | 62.1761658 | 40.707  | 7.40E+07 | 8.80E+07 | 9.70E+07 | 1.10E+08 | 9.90E+07 | 9.00E+07 |
| Q87LL2 | Fructose-bisphosphate aldolase, class II OS=Vibrio parahaemolyticus serotype O3:K6 (strain RIMD 2210633) GN=VP2599 PE=4 SV=1                             | 68.4357542 | 38.856  | 1.30E+08 | 1.60E+08 | 1.70E+08 | 1.90E+08 | 1.70E+08 | 1.60E+08 |
| Q87LL3 | Uncharacterized protein OS=Vibrio parahaemolyticus serotype O3:K6 (strain RIMD 2210633) GN=VP2598 PE=4 SV=1                                              | 6.59722222 | 30.956  |          |          | 3.80E+06 |          |          |          |
| Q87LL8 | D-3-phosphoglycerate dehydrogenase OS=Vibrio parahaemolyticus serotype O3:K6 (strain RIMD 2210633) GN=VP2593 PE=3 SV=1                                   | 50.9576096 | 44.658  | 4.30E+07 | 5.00E+07 | 4.50E+07 | 5.30E+07 | 4.90E+07 | 4.50E+07 |
| Q87LL9 | Ribose-5-phosphate isomerase A OS=Vibrio parahaemolyticus serotype O3:K6 (strain RIMD 2210633) GN=rpiA PE=3 SV=1                                         | 16.0550459 | 23.209  | 6.80E+06 | 7.10E+06 | 6.80E+06 | 7.00E+06 | 8.00E+06 | 4.70E+06 |
| Q87LM1 | tRNA-modifying protein YgJ OS=Vibrio parahaemolyticus serotype O3:K6 (strain RIMD 2210633) GN=VP283 PE=3 SV=1                                            | 7.14285714 | 35.507  | 3.70E+06 | 5.90E+06 | 4.50E+06 | 5.90E+06 | 3.80E+06 | 5.10E+06 |
| Q87LM8 | L-aspartate oxidase OS=Vibrio parahaemolyticus serotype O3:K6 (strain RIMD 2210633) GN=VP2580 PE=3 SV=1                                                  | 8.88888889 | 60.918  | 6.80E+06 | 9.10E+06 | 9.90E+06 | 1.00E+07 | 9.90E+06 | 1.00E+07 |
| Q87LP2 | Pyridoxine 5-phosphate synthase OS=Vibrio parahaemolyticus serotype O3:K6 (strain RIMD 2210633) GN=pxdJ PE=3 SV=1                                        | 8.23045267 | 26.655  | 4.80E+06 | 5.90E+06 | 6.80E+06 | 5.50E+06 | 5.80E+06 |          |
| Q87LP3 | CTP synthase OS=Vibrio parahaemolyticus serotype O3:K6 (strain RIMD 2210633) GN=pyrG PE=3 SV=1                                                           | 16.4835165 | 60.089  | 7.90E+06 | 5.50E+06 | 7.70E+06 | 1.30E+07 | 1.00E+07 | 9.30E+06 |
| Q87LQ0 | Enolase OS=Vibrio parahaemolyticus serotype O3:K6 (strain RIMD 2210633) GN=eno PE=3 SV=1                                                                 | 58.1986143 | 45.533  | 8.80E+07 | 1.10E+08 | 1.10E+08 | 1.30E+08 | 1.30E+08 | 1.20E+08 |
| Q87LQ8 | RNA polymerase sigma factor RpoS OS=Vibrio parahaemolyticus serotype O3:K6 (strain RIMD 2210633) GN=rpoS PE=3 SV=1                                       | 30.0940439 | 36.485  | 1.20E+07 | 2.10E+07 | 1.30E+07 | 2.40E+07 | 2.20E+07 | 2.00E+07 |
| Q87LR1 | Protein RecA OS=Vibrio parahaemolyticus serotype O3:K6 (strain RIMD 2210633) GN=rcaA PE=3 SV=1                                                           | 37.1757925 | 37.409  | 1.90E+07 | 2.80E+07 | 2.60E+07 | 1.70E+07 | 2.10E+07 | 2.00E+07 |
| Q87LR3 | Alanine-tRNA ligase OS=Vibrio parahaemolyticus serotype O3:K6 (strain RIMD 2210633) GN=alaS PE=3 SV=1                                                    | 11.8604651 | 93.91   | 5.70E+06 | 9.10E+06 | 9.00E+06 | 9.20E+06 | 9.70E+06 | 5.40E+06 |
| Q87LR5 | Carbon storage regulator homolog OS=Vibrio parahaemolyticus serotype O3:K6 (strain RIMD 2210633) GN=csrA PE=3 SV=1                                       | 18.4615385 | 7.108   | 1.50E+07 | 1.90E+07 | 1.70E+07 | 2.10E+07 | 1.80E+07 | 1.50E+07 |
| Q87LR7 | Oxalacetate decarboxylase, alpha subunit OS=Vibrio parahaemolyticus serotype O3:K6 (strain RIMD 2210633) GN=VP2544 PE=4 SV=1                             | 6.55462185 | 64.235  | 6.10E+06 |          | 8.70E+06 | 5.40E+06 | 7.40E+06 | 8.60E+06 |
| Q87LS2 | Glutamate-cysteine ligase OS=Vibrio parahaemolyticus serotype O3:K6 (strain RIMD 2210633) GN=gshA PE=3 SV=1                                              | 1.72413793 | 59.048  | 2.70E+06 |          |          |          |          |          |
| Q87LS4 | S-ribosylhomocysteine lyase OS=Vibrio parahaemolyticus serotype O3:K6 (strain RIMD 2210633) GN=luxS PE=3 SV=1                                            | 12.2093023 | 19.021  |          |          | 5.00E+06 | 4.60E+06 | 6.80E+06 | 3.10E+06 |
| Q87LS7 | Signal recognition particle protein OS=Vibrio parahaemolyticus serotype O3:K6 (strain RIMD 2210633) GN=frh PE=3 SV=1                                     | 3.04347826 | 50.248  |          | 5.70E+06 | 4.60E+06 |          | 6.20E+06 | 3.90E+06 |
| Q87LS8 | 30S ribosomal protein S16 OS=Vibrio parahaemolyticus serotype O3:K6 (strain RIMD 2210633) GN=rpsP PE=3 SV=1                                              | 10.9765988 | 9.058   |          |          |          |          | 1.40E+07 |          |
| Q87LT1 | 50S ribosomal protein L19 OS=Vibrio parahaemolyticus serotype O3:K6 (strain RIMD 2210633) GN=rplP PE=3 SV=2                                              | 56.4102564 | 13.211  | 4.50E+07 | 5.30E+07 | 6.20E+07 | 5.20E+07 | 6.20E+07 | 6.50E+07 |
| Q87LT2 | Pyruvate dehydrogenase E1 component OS=Vibrio parahaemolyticus serotype O3:K6 (strain RIMD 2210633) GN=VP2519 PE=4 SV=1                                  | 44.6848703 | 99.601  | 6.40E+07 | 8.20E+07 | 8.20E+07 | 6.90E+07 | 7.30E+07 | 6.50E+07 |
| Q87LU3 | Acetyltransferase component of pyruvate dehydrogenase complex OS=Vibrio parahaemolyticus serotype O3:K6 (strain RIMD 2210633) GN=VP2518 PE=3 SV=1        | 27.7511962 | 64.93   | 4.70E+07 | 4.90E+07 | 5.50E+07 | 4.90E+07 | 5.20E+07 | 3.70E+07 |
| Q87LU4 | Carbonic anhydrase OS=Vibrio parahaemolyticus serotype O3:K6 (strain RIMD 2210633) GN=VP2514 PE=3 SV=1                                                   | 5.85585858 | 25.206  |          |          |          |          |          |          |
| Q87LW3 | Aconitate hydratase B OS=Vibrio parahaemolyticus serotype O3:K6 (strain RIMD 2210633) GN=VP2495 PE=3 SV=1                                                | 31.3294798 | 94.013  | 2.60E+07 | 9.10E+07 | 2.80E+07 | 2.90E+07 | 3.50E+07 | 3.00E+07 |
| Q87LW7 | Iron(III) ABC transporter, periplasmic iron-compound-binding protein OS=Vibrio parahaemolyticus serotype O3:K6 (strain RIMD 2210633) GN=VP2491 PE=4 SV=1 | 50.7418398 | 37.673  | 1.10E+08 | 1.10E+08 | 1.00E+08 | 1.10E+08 | 1.00E+08 | 9.00E+07 |
| Q87LX0 | Putative phosphoglucomutase/phosphomannomutase OS=Vibrio parahaemolyticus serotype O3:K6 (strain RIMD 2210633) GN=VP2488 PE=4 SV=1                       | 14.2553191 | 52.254  |          |          |          |          |          | 7.70E+06 |
| Q87LX1 | NN'-diacetylchitobiose phosphorylase OS=Vibrio parahaemolyticus serotype O3:K6 (strain RIMD 2210633) GN=VP2487 PE=4 SV=1                                 | 23.4413965 | 90.02   |          |          |          | 9.90E+06 | 2.10E+07 | 3.50E+07 |
| Q87LX9 | Peptide ABC transporter, periplasmic peptide-binding protein OS=Vibrio parahaemolyticus serotype O3:K6 (strain RIMD 2210633) GN=VP2479 PE=4 SV=1         | 21.4285714 | 62.865  |          |          |          | 9.80E+06 | 6.60E+07 | 8.00E+07 |
| Q87LZ1 | Outer membrane protein U OS=Vibrio parahaemolyticus serotype O3:K6 (strain RIMD 2210633) GN=ompU PE=3 SV=1                                               | 27.8931751 | 36.263  | 3.00E+07 | 2.50E+07 | 3.00E+07 | 4.60E+07 | 2.40E+07 | 2.50E+07 |
| Q87LZ2 | Transcription elongation factor GreA OS=Vibrio parahaemolyticus serotype O3:K6 (strain RIMD 2210633) GN=grea PE=3 SV=1                                   | 7.00636943 | 17.487  | 2.10E+06 |          |          | 2.40E+06 |          |          |
| Q87LZ3 | Putative RNA-binding protein containing KH domain OS=Vibrio parahaemolyticus serotype O3:K6 (strain RIMD 2210633) GN=VP2465 PE=4 SV=1                    | 9.18367347 | 10.994  |          |          |          | 6.10E+06 |          | 5.00E+06 |
| Q87LZ5 | ATP-dependent zinc metalloprotease FtsH OS=Vibrio parahaemolyticus serotype O3:K6 (strain RIMD 2210633) GN=ftsH PE=3 SV=1                                | 5.43806647 | 72.936  |          |          |          | 2.60E+06 |          |          |
| Q87M01 | Transcription termination/antitermination protein NusA OS=Vibrio parahaemolyticus serotype O3:K6 (strain RIMD 2210633) GN=nusA PE=3 SV=1                 | 14.1414141 | 54.911  | 8.20E+06 | 1.10E+07 | 1.10E+07 | 1.10E+07 | 1.00E+07 | 9.70E+06 |
| Q87M02 | Translation initiation factor IF-2 OS=Vibrio parahaemolyticus serotype O3:K6 (strain RIMD 2210633) GN=infB PE=3 SV=1                                     | 14.8062968 | 99.335  | 1.70E+07 | 2.00E+07 | 2.10E+07 | 2.00E+07 | 2.10E+07 | 1.60E+07 |
| Q87M05 | 30S ribosomal protein S15 OS=Vibrio parahaemolyticus serotype O3:K6 (strain RIMD 2210633) GN=rpsO PE=3 SV=1                                              | 13.4831461 | 10.057  | 3.90E+07 | 4.00E+07 | 5.00E+07 | 5.60E+07 | 6.20E+07 | 5.20E+07 |
| Q87M06 | Polyribonucleotide nucleotidyltransferase OS=Vibrio parahaemolyticus serotype O3:K6 (strain RIMD 2210633) GN=ppn PE=3 SV=1                               | 4.78933896 | 76.691  | 2.40E+07 | 2.40E+07 | 3.60E+07 | 2.60E+07 | 1.90E+07 | 2.60E+07 |
| Q87M22 | Deoxyribose-phosphate aldolase OS=Vibrio parahaemolyticus serotype O3:K6 (strain RIMD 2210633) GN=deoC PE=3 SV=1                                         | 32.6356589 | 27.727  | 1.10E+07 | 9.40E+06 | 1.10E+07 | 8.50E+06 | 8.60E+06 | 8.50E+06 |
| Q87M25 | Purine nucleoside phosphorylase DeoD-type 1 OS=Vibrio parahaemolyticus serotype O3:K6 (strain RIMD 2210633) GN=deoD1 PE=3 SV=1                           | 10.460251  | 25.878  | 1.00E+07 |          |          |          | 1.50E+07 | 1.60E+07 |
| Q87M27 | Phosphoserine phosphatase OS=Vibrio parahaemolyticus serotype O3:K6 (strain RIMD 2210633) GN=VP2431 PE=4 SV=1                                            | 19.3251534 | 35.774  | 6.20E+06 | 6.60E+06 | 7.30E+06 | 7.80E+06 | 6.60E+06 | 7.70E+06 |
| Q87M30 | Elongation factor G 2 OS=Vibrio parahaemolyticus serotype O3:K6 (strain RIMD 2210633) GN=elgA2 PE=3 SV=1                                                 | 53.1609195 | 76.319  | 8.80E+07 | 1.10E+08 | 1.00E+08 | 1.20E+08 | 1.20E+08 | 1.00E+08 |
| Q87M78 | 2,3,4,5-tetrahydroxyindole-2,6-dicarboxylate N-succinyltransferase OS=Vibrio parahaemolyticus serotype O3:K6 (strain RIMD 2210633) GN=dapD PE=3 SV=1     | 24.7813411 | 35.618  | 2.00E+07 | 2.80E+07 | 3.30E+07 | 3.40E+07 | 2.80E+07 | 2.40E+07 |
| Q87M80 | Putative transcriptional activator ChrR OS=Vibrio parahaemolyticus serotype O3:K6 (strain RIMD 2210633) GN=VP2357 PE=4 SV=1                              | 8.21917808 | 23.985  |          |          |          |          |          |          |
| Q87MA3 | Proline-tRNA ligase OS=Vibrio parahaemolyticus serotype O3:K6 (strain RIMD 2210633) GN=proS PE=3 SV=1                                                    | 13.3099825 | 63.216  | 4.40E+06 | 5.80E+06 | 6.60E+06 | 6.90E+06 | 9.80E+06 | 2.60E+06 |
| Q87MD7 | Methionine aminopeptidase OS=Vibrio parahaemolyticus serotype O3:K6 (strain RIMD 2210633) GN=map PE=3 SV=1                                               | 2.39728027 | 32.327  |          | 3.80E+06 |          |          | 3.40E+06 | 3.20E+06 |
| Q87MD8 | 30S ribosomal protein S2 OS=Vibrio parahaemolyticus serotype O3:K6 (strain RIMD 2210633) GN=rpsB PE=3 SV=1                                               | 33.4710744 | 28.791  | 7.90E+06 | 1.60E+07 | 2.20E+07 | 7.80E+06 | 1.30E+07 | 1.50E+07 |
| Q87MD9 | Elongation factor Ts OS=Vibrio parahaemolyticus serotype O3:K6 (strain RIMD 2210633) GN=tsf PE=3 SV=1                                                    | 69.0391459 | 29.755  | 7.40E+07 | 7.70E+07 | 8.00E+07 | 8.80E+07 | 9.50E+07 | 7.10E+07 |
| Q87M6  | Chaperone protein skp OS=Vibrio parahaemolyticus serotype O3:K6 (strain RIMD 2210633) GN=VP2309 PE=3 SV=1                                                | 28.9156627 | 18.488  | 1.10E+07 | 7.20E+06 | 1.10E+07 | 1.40E+07 | 1.10E+07 | 9.80E+06 |
| Q87ME8 | 3-hydroxyacyl-[acyl-carrier-protein] dehydratase FabZ OS=Vibrio parahaemolyticus serotype O3:K6 (strain RIMD 2210633) GN=fabZ PE=3 SV=1                  | 18.6666667 | 16.828  | 7        |          |          |          |          |          |

|         |                                                                                                                                                                 |             |         |          |          |          |          |          |          |
|---------|-----------------------------------------------------------------------------------------------------------------------------------------------------------------|-------------|---------|----------|----------|----------|----------|----------|----------|
| Q87N50  | Uncharacterized protein OS=Vibrio parahaemolyticus serotype O3:K6 (strain RIMD 2210633) GN=VP2025 PE=4 SV=1                                                     | 7.95795796  | 76.629  | 9.00E+06 | 7.10E+06 | 8.20E+06 | 9.60E+06 | 7.30E+06 | 8.60E+06 |
| Q87N51  | Uncharacterized protein OS=Vibrio parahaemolyticus serotype O3:K6 (strain RIMD 2210633) GN=VP1992 PE=4 SV=1                                                     | 17.2839506  | 37.643  | 8.40E+06 | 8.80E+06 | 6.10E+06 | 5.90E+06 | 1.00E+07 |          |
| Q87N84  | 5-methyltetrahydropteroylglutamate-homocysteine methyltransferase OS=Vibrio parahaemolyticus serotype O3:K6 (strain RIMD 2210633) GN=VP1991 PE=4 SV=1           | 2.92397661  | 38.487  |          | 6.10E+06 | 7.00E+06 |          | 6.10E+06 | 3.80E+06 |
| Q87N88  | Uncharacterized protein OS=Vibrio parahaemolyticus serotype O3:K6 (strain RIMD 2210633) GN=VP1987 PE=4 SV=1                                                     | 6.04385604  | 19.965  | 1.10E+07 |          | 1.40E+07 | 1.40E+07 | 1.40E+07 | 9.30E+06 |
| Q87N91  | Putative two-component sensor OS=Vibrio parahaemolyticus serotype O3:K6 (strain RIMD 2210633) GN=VP1984 PE=4 SV=1                                               | 2.99539171  | 46.549  |          |          |          |          |          |          |
| Q87N91A | 5-methyltetrahydropteroylglutamate-homocysteine methyltransferase OS=Vibrio parahaemolyticus serotype O3:K6 (strain RIMD 2210633) GN=meE PE=3 SV=1              | 65.1315789  | 84.66   | 1.90E+08 | 2.20E+08 | 2.20E+08 | 2.50E+08 | 2.60E+08 | 2.30E+08 |
| Q87N95  | Putative translation factor OS=Vibrio parahaemolyticus serotype O3:K6 (strain RIMD 2210633) GN=VP1953 PE=4 SV=1                                                 | 4.85436893  | 22.912  |          |          |          |          |          | 4.30E+07 |
| Q87N90  | Elongation factor P-like protein OS=Vibrio parahaemolyticus serotype O3:K6 (strain RIMD 2210633) GN=VP1948 PE=3 SV=1                                            | 13.8297872  | 20.734  |          | 4.50E+06 |          |          | 8.90E+06 |          |
| Q87N96  | Diaminobutylate-pyruvate transaminase & L-2,4-diaminobutylate decarboxylase OS=Vibrio parahaemolyticus serotype O3:K6 (strain RIMD 2210633) GN=VP1942 PE=1 SV=1 | 8.14196242  | 104.32  | 5.80E+06 | 1.20E+07 |          |          | 8.20E+06 | 7.90E+06 |
| Q87N97  | Putative carboxynorspermidine dehydrogenase OS=Vibrio parahaemolyticus serotype O3:K6 (strain RIMD 2210633) GN=VP1941 PE=4 SV=1                                 | 19.4244604  | 46.471  | 1.00E+07 | 1.20E+07 | 8.60E+06 | 1.30E+07 | 8.70E+06 | 8.50E+06 |
| Q87N98  | Carboxynorspermidine/carboxyspermidine decarboxylase OS=Vibrio parahaemolyticus serotype O3:K6 (strain RIMD 2210633) GN=VP1940 PE=3 SV=1                        | 4.50928382  | 42.003  | 3.30E+06 |          | 2.40E+06 |          |          |          |
| Q87N99  | Uncharacterized protein OS=Vibrio parahaemolyticus serotype O3:K6 (strain RIMD 2210633) GN=VP1939 PE=4 SV=1                                                     | 7.05882353  | 18.444  |          |          | 1.80E+06 | 3.90E+06 |          |          |
| Q87N94  | Ribonucleoside-diphosphate reductase OS=Vibrio parahaemolyticus serotype O3:K6 (strain RIMD 2210633) GN=VP1934 PE=3 SV=1                                        | 2.10526316  | 85.622  |          |          |          |          |          |          |
| Q87N96  | DNA gyrase subunit A OS=Vibrio parahaemolyticus serotype O3:K6 (strain RIMD 2210633) GN=gyrA PE=3 SV=1                                                          | 10.1366743  | 97.04   | 1.20E+07 | 1.70E+07 | 1.40E+07 | 1.10E+07 | 1.80E+07 | 1.00E+07 |
| Q87N97  | GTP cyclohydrolase-2 OS=Vibrio parahaemolyticus serotype O3:K6 (strain RIMD 2210633) GN=rbaA PE=3 SV=1                                                          | 5.55555556  | 22.294  | 6.20E+06 |          | 6.80E+06 |          |          |          |
| Q87N97  | Extracellular solute-binding protein, family 7 OS=Vibrio parahaemolyticus serotype O3:K6 (strain RIMD 2210633) GN=VP1911 PE=3 SV=1                              | 17.679558   | 40.992  | 7.10E+06 | 1.30E+07 | 4.10E+06 | 1.50E+07 |          | 6.10E+06 |
| Q87N98  | Aspartate aminotransferase OS=Vibrio parahaemolyticus serotype O3:K6 (strain RIMD 2210633) GN=VP1900 PE=3 SV=1                                                  | 62.8019324  | 45.449  | 1.40E+08 | 2.30E+08 | 2.30E+08 | 2.10E+08 | 2.20E+08 | 1.80E+08 |
| Q87N95  | Asparagine-tRNA ligase OS=Vibrio parahaemolyticus serotype O3:K6 (strain RIMD 2210633) GN=asnS PE=3 SV=1                                                        | 47.4248927  | 52.557  | 6.80E+07 | 6.60E+07 | 6.00E+07 | 6.20E+07 | 7.20E+07 | 5.50E+07 |
| Q87N97  | Homoserine O-succinyltransferase OS=Vibrio parahaemolyticus serotype O3:K6 (strain RIMD 2210633) GN=metA PE=3 SV=1                                              | 3.83386581  | 36.249  |          |          |          |          | 9.60E+06 |          |
| Q87N94  | Thermostable carboxypeptidase 1 OS=Vibrio parahaemolyticus serotype O3:K6 (strain RIMD 2210633) GN=VP1744 PE=4 SV=1                                             | 2.16535433  | 57.33   |          | 5.20E+06 | 4.60E+06 | 4.50E+06 | 2.60E+06 |          |
| Q87N93  | Histidine kinase OS=Vibrio parahaemolyticus serotype O3:K6 (strain RIMD 2210633) GN=VP1735 PE=4 SV=1                                                            | 1.47058824  | 54.354  |          |          | 3.20E+05 |          |          |          |
| Q87P08  | Glucose-6-phosphate 1-dehydrogenase OS=Vibrio parahaemolyticus serotype O3:K6 (strain RIMD 2210633) GN=zwf PE=3 SV=1                                            | 5.78842315  | 57.604  |          | 7.80E+06 | 8.50E+06 |          | 5.70E+06 | 4.60E+06 |
| Q87P09  | DevB protein OS=Vibrio parahaemolyticus serotype O3:K6 (strain RIMD 2210633) GN=VP1709 PE=4 SV=1                                                                | 4.20168067  | 25.977  |          | 1.20E+07 |          |          |          |          |
| Q87P10  | 6-phosphogluconate dehydrogenase, decarboxylating OS=Vibrio parahaemolyticus serotype O3:K6 (strain RIMD 2210633) GN=VP1708 PE=3 SV=1                           | 24.06639    | 52.502  | 1.80E+07 | 3.00E+07 | 2.10E+07 | 2.90E+07 | 2.80E+07 | 2.20E+07 |
| Q87P15  | Aldehyde dehydrogenase OS=Vibrio parahaemolyticus serotype O3:K6 (strain RIMD 2210633) GN=VP1703 PE=3 SV=1                                                      | 20.3557312  | 55.651  |          |          | 2.30E+07 |          | 3.30E+07 |          |
| Q87P20  | Uncharacterized protein OS=Vibrio parahaemolyticus serotype O3:K6 (strain RIMD 2210633) GN=VP1698 PE=4 SV=1                                                     | 14.7590361  | 38.479  | 9.20E+06 | 6.10E+06 | 6.50E+06 | 7.50E+06 | 7.10E+06 | 6.90E+06 |
| Q87P32  | Adenosine monophosphate-protein transferase VopS OS=Vibrio parahaemolyticus serotype O3:K6 (strain RIMD 2210633) GN=vopS PE=1 SV=1                              | 28.6821705  | 41.711  | 8.80E+06 | 1.00E+07 | 8.40E+06 | 7.50E+06 | 1.00E+07 | 4.30E+06 |
| Q87P37  | Uncharacterized protein OS=Vibrio parahaemolyticus serotype O3:K6 (strain RIMD 2210633) GN=VP1882 PE=4 SV=1                                                     | 27.6315789  | 17.116  | 5.10E+06 | 1.00E+07 |          |          |          |          |
| Q87P47  | Putative translocation protein in type III secretion OS=Vibrio parahaemolyticus serotype O3:K6 (strain RIMD 2210633) GN=VP1671 PE=4 SV=1                        | 6.40243902  | 36.436  | 4.60E+06 | 7.50E+06 | 4.10E+06 | 3.50E+06 | 5.40E+06 |          |
| Q87P59  | Uncharacterized protein OS=Vibrio parahaemolyticus serotype O3:K6 (strain RIMD 2210633) GN=VP1659 PE=4 SV=1                                                     | 20.92257    | 67.03   | 2.00E+07 | 1.90E+07 | 1.90E+07 | 1.30E+07 | 2.20E+07 | 1.10E+07 |
| Q87P60  | Low calcium response locus protein H OS=Vibrio parahaemolyticus serotype O3:K6 (strain RIMD 2210633) GN=VP1658 PE=4 SV=1                                        | 29.0123457  | 18.117  | 1.90E+07 | 2.20E+07 | 2.10E+07 | 1.60E+07 | 1.80E+07 | 1.40E+07 |
| Q87P61  | Putative translocator protein PopB OS=Vibrio parahaemolyticus serotype O3:K6 (strain RIMD 2210633) GN=VP1657 PE=4 SV=1                                          | 5.51784404  | 41.314  | 6.80E+06 | 6.60E+06 | 5.90E+06 | 7.40E+06 | 1.10E+07 | 5.50E+06 |
| Q87P62  | Putative translocator protein PopD OS=Vibrio parahaemolyticus serotype O3:K6 (strain RIMD 2210633) GN=VP1656 PE=4 SV=1                                          | 25.748503   | 35.286  | 1.80E+07 | 2.40E+07 | 2.40E+07 | 1.60E+07 | 2.40E+07 | 1.50E+07 |
| Q87P63  | Immunoconjugin protein OS=Vibrio parahaemolyticus serotype O3:K6 (strain RIMD 2210633) GN=VP1655 PE=4 SV=1                                                      | 2.766377171 | 34.901  | 5.20E+07 | 7.40E+07 | 6.30E+07 | 7.10E+07 | 7.40E+07 | 4.10E+07 |
| Q87P60  | RNA chaperone ProQ OS=Vibrio parahaemolyticus serotype O3:K6 (strain RIMD 2210633) GN=proQ PE=3 SV=1                                                            | 15.3110048  | 23.23   | 3.40E+07 | 8.20E+06 | 9.60E+06 | 7.50E+06 | 3.40E+07 | 8.50E+06 |
| Q87P63  | Aminopeptidase N OS=Vibrio parahaemolyticus serotype O3:K6 (strain RIMD 2210633) GN=VP1604 PE=4 SV=1                                                            | 4.13793103  | 98.399  | 2.70E+06 | 4.30E+06 | 2.30E+06 |          | 3.00E+06 | 2.10E+06 |
| Q87P65  | Putative NAD-glutamate dehydrogenase OS=Vibrio parahaemolyticus serotype O3:K6 (strain RIMD 2210633) GN=VP1602 PE=4 SV=1                                        | 0.68195908  | 183.379 | 2.80E+06 | 4.70E+06 |          |          | 3.30E+06 |          |
| Q87P67  | Dihydroorotate dehydrogenase (quinone) OS=Vibrio parahaemolyticus serotype O3:K6 (strain RIMD 2210633) GN=pyrD PE=3 SV=1                                        | 7.44047619  | 36.859  |          |          |          |          |          | 4.50E+06 |
| Q87P68  | Cell division protein ZapC OS=Vibrio parahaemolyticus serotype O3:K6 (strain RIMD 2210633) GN=zapC PE=3 SV=1                                                    | 30          | 20.763  | 7.30E+06 | 1.20E+07 | 8.90E+06 | 6.20E+06 | 7.60E+06 | 6.50E+06 |
| Q87P65  | 3-hydroxydecanoyl-[acyl-carrier-protein] dehydratase OS=Vibrio parahaemolyticus serotype O3:K6 (strain RIMD 2210633) GN=fabA PE=3 SV=1                          | 20.3488372  | 18.985  | 2.20E+07 | 3.20E+07 | 2.80E+07 | 3.20E+07 | 2.80E+07 | 2.50E+07 |
| Q87P66  | Uncharacterized protein OS=Vibrio parahaemolyticus serotype O3:K6 (strain RIMD 2210633) GN=VP1564 PE=4 SV=1                                                     | 22.7459016  | 56.383  | 9.10E+06 | 1.10E+07 | 8.70E+06 | 8.70E+06 | 1.00E+07 | 7.90E+06 |
| Q87P66  | Fumarate and nitrate reduction regulatory protein OS=Vibrio parahaemolyticus serotype O3:K6 (strain RIMD 2210633) GN=VP1536 PE=4 SV=1                           | 4.43548387  | 27.816  | 5.20E+06 | 7.50E+06 | 6.30E+06 | 5.40E+06 | 6.30E+06 | 5.40E+06 |
| Q87P67  | Putative stress protein OS=Vibrio parahaemolyticus serotype O3:K6 (strain RIMD 2210633) GN=VP1535 PE=4 SV=1                                                     | 13.33333333 | 35.308  | 5.50E+06 | 5.40E+06 | 6.10E+06 | 1.80E+07 |          | 5.30E+06 |
| Q87P68  | Putrescine-binding periplasmic protein OS=Vibrio parahaemolyticus serotype O3:K6 (strain RIMD 2210633) GN=VP1526 PE=3 SV=1                                      | 18.7323294  | 39.658  | 1.00E+07 |          | 1.50E+07 | 1.50E+07 |          | 1.40E+07 |
| Q87P67  | Putrescine-binding periplasmic protein OS=Vibrio parahaemolyticus serotype O3:K6 (strain RIMD 2210633) GN=VP1525 PE=3 SV=1                                      | 4.057917011 | 38.974  |          |          |          |          | 2.90E+06 |          |
| Q87P62  | Uncharacterized protein OS=Vibrio parahaemolyticus serotype O3:K6 (strain RIMD 2210633) GN=VP1501 PE=1 SV=1                                                     | 11.3970588  | 30.055  | 6.00E+06 | 6.00E+06 | 5.30E+06 | 5.90E+06 | 4.80E+06 | 5.80E+06 |
| Q87P68  | N-acetyl-D-glucosamine kinase OS=Vibrio parahaemolyticus serotype O3:K6 (strain RIMD 2210633) GN=mgk PE=3 SV=1                                                  | 11.25827811 | 32.755  | 1.80E+06 | 1.60E+06 | 5.00E+06 | 1.70E+06 | 7.80E+06 | 6.30E+06 |
| Q87P62  | Riboflavin synthase, alpha chain OS=Vibrio parahaemolyticus serotype O3:K6 (strain RIMD 2210633) GN=VP1480 PE=4 SV=1                                            | 5.41871921  | 22.027  |          |          |          |          | 2.50E+06 |          |
| Q87P65  | Uncharacterized protein OS=Vibrio parahaemolyticus serotype O3:K6 (strain RIMD 2210633) GN=VP1436 PE=4 SV=1                                                     | 4.54545455  | 27.73   | 4.00E+06 |          | 5.60E+06 |          | 5.40E+06 |          |
| Q87P78  | Uncharacterized protein OS=Vibrio parahaemolyticus serotype O3:K6 (strain RIMD 2210633) GN=VP1413 PE=4 SV=1                                                     | 4.98866213  | 49.098  | 7.40E+06 |          | 1.90E+06 |          |          |          |
| Q87P68  | Uncharacterized protein OS=Vibrio parahaemolyticus serotype O3:K6 (strain RIMD 2210633) GN=VP1403 PE=4 SV=1                                                     | 14.2566191  | 55.542  | 1.20E+07 | 5.70E+06 | 1.10E+07 |          | 1.30E+07 |          |
| Q87P65  | Uncharacterized protein OS=Vibrio parahaemolyticus serotype O3:K6 (strain RIMD 2210633) GN=VP1396 PE=4 SV=1                                                     | 2.33463035  | 29.853  | 1.00E+07 | 9.50E+06 |          | 7.40E+06 | 6.40E+06 | 9.00E+06 |
| Q87P68  | Putative ClpA/B-type protease OS=Vibrio parahaemolyticus serotype O3:K6 (strain RIMD 2210633) GN=VP1392 PE=3 SV=1                                               | 2.69662921  | 97.861  | 3.70E+06 | 1.80E+06 | 4.30E+06 |          | 3.50E+06 |          |
| Q87Q03  | Oligopeptide ABC transporter, periplasmic oligopeptide-binding protein OS=Vibrio parahaemolyticus serotype O3:K6 (strain RIMD 2210633) GN=VP1347 PE=4 SV=1      | 1.67910448  | 60.287  | 7.50E+06 |          | 1.20E+07 | 9.70E+06 | 9.30E+06 | 8.70E+06 |
| Q87Q40  | Succinylglutamate desuccinylase OS=Vibrio parahaemolyticus serotype O3:K6 (strain RIMD 2210633) GN=astE PE=1 SV=1                                               | 8.47953216  | 38.813  |          | 4.60E+06 |          | 4.60E+06 |          |          |
| Q87Q42  | Putative oligopeptidase F OS=Vibrio parahaemolyticus serotype O3:K6 (strain RIMD 2210633) GN=VP1308 PE=4 SV=1                                                   | 2.17028381  | 67.96   |          | 2.40E+06 |          |          |          |          |
| Q87Q53  | Phosphoribosylglycylamide formyltransferase 2 OS=Vibrio parahaemolyticus serotype O3:K6 (strain RIMD 2210633) GN=purT PE=3 SV=1                                 | 6.3986189   | 42.864  |          |          | 2.90E+06 |          | 3.60E+06 |          |
| Q87Q56  | Integration host factor subunit alpha OS=Vibrio parahaemolyticus serotype O3:K6 (strain RIMD 2210633) GN=hfa PE=3 SV=1                                          | 19.3877551  | 11.201  | 1.90E+07 | 1.80E+07 | 2.80E+07 | 1.90E+07 | 2.00E+07 | 2.50E+07 |
| Q87Q59  | Phenylalanine-tRNA ligase beta subunit OS=Vibrio parahaemolyticus serotype O3:K6 (strain RIMD 2210633) GN=pheT PE=3 SV=1                                        | 15.70330731 | 87.044  | 1.30E+07 | 1.10E+07 | 1.40E+07 | 1.20E+07 | 1.10E+07 | 1.10E+07 |
| Q87Q60  | Phenylalanine-tRNA ligase alpha subunit OS=Vibrio parahaemolyticus serotype O3:K6 (strain RIMD 2210633) GN=pheS PE=3 SV=1                                       | 11.9286055  | 36.85   | 6.00E+06 | 8.00E+06 | 6.80E+06 | 8.80E+06 | 7.00E+06 |          |
| Q87Q70  | Threonine-tRNA ligase OS=Vibrio parahaemolyticus serotype O3:K6 (strain RIMD 2210633) GN=thrS PE=3 SV=1                                                         | 8.8750467   | 73.714  | 1.00E+07 | 1.30E+07 | 1.20E+07 | 1.20E+07 | 1.40E+07 | 1.10E+07 |
| Q87Q81  | Uncharacterized protein OS=Vibrio parahaemolyticus serotype O3:K6 (strain RIMD 2210633) GN=VP1269 PE=4 SV=1                                                     | 9.73451327  | 25.259  |          | 7.00E+06 |          | 6.10E+06 | 3.80E+06 | 6.50E+06 |
| Q87Q87  | Phosphoribosylamidoimidazole-succinocarboxamide synthase OS=Vibrio parahaemolyticus serotype O3:K6 (strain RIMD 2210633) GN=purC PE=3 SV=1                      | 28.6103542  | 41.031  | 9.00E+06 | 1.30E+07 | 1.50E+07 | 1.00E+07 | 1.60E+07 | 1.20E+07 |
| Q87Q92  | NAD-dependent malic enzyme OS=Vibrio parahaemolyticus serotype O3:K6 (strain RIMD 2210633) GN=maeA PE=3 SV=1                                                    | 12.0996441  | 62.26   | 8.40E+06 |          | 9.20E+06 | 8.20E+06 | 1.20E+07 | 1.00E+07 |
| Q87Q99  | Thioredoxin reductase OS=Vibrio parahaemolyticus serotype O3:K6 (strain RIMD 2210633) GN=VP1251 PE=3 SV=1                                                       | 10.3448276  | 34.487  | 2.10E+07 | 1.30E+07 |          | 6.80E+06 |          | 9.10E+06 |
| Q87Q03  | Phosphoserine aminotransferase OS=Vibrio parahaemolyticus serotype O3:K6 (strain RIMD 2210633) GN=serC PE=3 SV=1                                                | 28.021978   | 40.175  | 2.50E+07 | 2.90E+07 | 2.60E+07 | 3.30E+07 | 2.90E+07 | 2.70E+07 |
| Q87Q89  | Putative reductase VP1231 OS=Vibrio parahaemolyticus serotype O3:K6 (strain RIMD 2210633) GN=VP1231 PE=3 SV=1                                                   | 46.25       | 43.941  | 3.50E+07 | 4.10E+07 | 4.20E+07 | 4.10E+07 | 4.00E+07 | 2.90E+07 |
| Q87Q89  | 50S ribosomal protein L25 OS=Vibrio parahaemolyticus serotype O3:K6 (strain RIMD 2210633) GN=rplY PE=3 SV=1                                                     | 8.69565217  | 10.408  | 1.20E+07 | 1.20E+07 | 1.50E+07 | 1.50E+07 | 1.80E+07 | 1.30E+07 |
| Q87Q86  | Heat shock protein HslJ OS=Vibrio parahaemolyticus serotype O3:K6 (strain RIMD 2210633) GN=VP1203 PE=4 SV=1                                                     | 6.08108108  | 16.586  | 3.80E+06 |          |          |          | 4.60E+06 |          |
| Q87Q87  | Cystathionine beta-lyase OS=Vibrio parahaemolyticus serotype O3:K6 (strain RIMD 2210633) GN=VP1182 PE=3 SV=1                                                    | 7.960199    | 44.609  | 1.20E+07 | 1.40E+07 | 9.80E+06 | 1.30E+07 | 1.40E+07 | 1.40E+07 |
| Q87Q89  | Cysteine-tRNA ligase OS=Vibrio parahaemolyticus serotype O3:K6 (strain RIMD 2210633) GN=cysS PE=3 SV=1                                                          | 11.0889655  | 52.014  | 3.80E+06 | 7.20E+06 | 3.50E+06 |          |          |          |



|        |                                                                                                                                                                                        |            |         |          |          |          |          |          |          |          |  |
|--------|----------------------------------------------------------------------------------------------------------------------------------------------------------------------------------------|------------|---------|----------|----------|----------|----------|----------|----------|----------|--|
| Q87R49 | Acyl-CoA thioesterase II OS=Vibrio parahaemolyticus serotype O3:K6 (strain RIMD 2210633) GN=VP0949 PE=4 SV=1                                                                           | 3.4965035  | 32.574  |          |          |          |          |          |          |          |  |
| Q87R78 | DNA-binding protein HU-beta OS=Vibrio parahaemolyticus serotype O3:K6 (strain RIMD 2210633) GN=VP0920 PE=3 SV=1                                                                        | 28.8888889 | 9.402   | 1.30E+08 | 1.30E+08 | 1.30E+08 | 1.40E+08 | 1.40E+08 | 1.40E+08 | 1.20E+08 |  |
| Q87R80 | ATP-dependent Clp protease proteolytic subunit OS=Vibrio parahaemolyticus serotype O3:K6 (strain RIMD 2210633) GN=clpP PE=3 SV=1                                                       | 30         | 21.961  | 3.60E+07 | 4.10E+07 | 3.00E+07 | 4.10E+07 | 3.60E+07 | 3.10E+07 |          |  |
| Q87R81 | Trigger factor OS=Vibrio parahaemolyticus serotype O3:K6 (strain RIMD 2210633) GN=trf PE=3 SV=1                                                                                        | 56.9124424 | 48.225  | 5.00E+07 | 6.30E+07 | 6.00E+07 | 6.20E+07 | 7.20E+07 | 5.50E+07 |          |  |
| Q87R87 | C4-dicarboxylate-binding periplasmic protein OS=Vibrio parahaemolyticus serotype O3:K6 (strain RIMD 2210633) GN=VP0910 PE=4 SV=1                                                       | 24.3975904 | 37.109  | 1.10E+07 | 1.60E+07 | 2.00E+07 | 2.00E+07 | 2.60E+07 | 2.00E+07 |          |  |
| Q87R88 | Bifunctional protein FcD OS=Vibrio parahaemolyticus serotype O3:K6 (strain RIMD 2210633) GN=fcD PE=3 SV=1                                                                              | 31.6685315 | 30.787  |          |          | 3.50E+06 |          |          |          |          |  |
| Q87R03 | Formyltetrahydrofolate deformylase OS=Vibrio parahaemolyticus serotype O3:K6 (strain RIMD 2210633) GN=ppurU PE=3 SV=1                                                                  | 2.52707581 | 31.6    |          |          |          |          |          | 1.10E+07 |          |  |
| Q87RD6 | Arginine-tRNA ligase OS=Vibrio parahaemolyticus serotype O3:K6 (strain RIMD 2210633) GN=argS PE=3 SV=1                                                                                 | 13.8915078 | 63.83   | 2.90E+06 | 6.60E+06 | 6.60E+06 | 4.00E+06 | 3.30E+06 | 7.80E+06 |          |  |
| Q87RE4 | Zinc ABC transporter, periplasmic zinc-binding protein OS=Vibrio parahaemolyticus serotype O3:K6 (strain RIMD 2210633) GN=VP0853 PE=3 SV=1                                             | 18.1506849 | 32.129  | 7.40E+06 | 1.00E+07 | 7.10E+06 | 8.90E+06 | 1.30E+07 | 8.40E+06 |          |  |
| Q87RE7 | Succinyl-CoA ligase [ADP-forming] subunit alpha OS=Vibrio parahaemolyticus serotype O3:K6 (strain RIMD 2210633) GN=VP0850 PE=3 SV=1                                                    | 48.6206897 | 29.974  | 4.70E+07 | 6.10E+07 | 4.70E+07 | 4.90E+07 | 5.00E+07 | 4.00E+07 |          |  |
| Q87RE8 | Succinyl-CoA ligase [ADP-forming] subunit beta OS=Vibrio parahaemolyticus serotype O3:K6 (strain RIMD 2210633) GN=sucC PE=3 SV=1                                                       | 56.7010309 | 41.516  | 7.90E+07 | 1.00E+08 | 7.80E+07 | 8.40E+07 | 8.00E+07 | 6.00E+07 |          |  |
| Q87RE9 | Dihydropolypyrroline-residue succinyltransferase component of 2-oxoglutarate dehydrogenase complex OS=Vibrio parahaemolyticus serotype O3:K6 (strain RIMD 2210633) GN=VP0848 PE=3 SV=1 | 44.3890274 | 43.675  | 7.00E+07 | 7.10E+07 | 6.30E+07 | 6.30E+07 | 6.40E+07 | 5.00E+07 |          |  |
| Q87RF0 | 2-oxoglutarate dehydrogenase, E1 component OS=Vibrio parahaemolyticus serotype O3:K6 (strain RIMD 2210633) GN=VP0847 PE=4 SV=1                                                         | 20.8289054 | 106.016 | 2.80E+07 | 2.60E+07 | 2.80E+07 | 2.80E+07 | 2.50E+07 | 2.10E+07 |          |  |
| Q87RF1 | Succinate dehydrogenase iron-sulfur subunit OS=Vibrio parahaemolyticus serotype O3:K6 (strain RIMD 2210633) GN=VP0846 PE=3 SV=1                                                        | 5.08474576 | 26.308  |          |          | 2.90E+06 |          |          |          |          |  |
| Q87RF2 | Succinate dehydrogenase flavoprotein subunit OS=Vibrio parahaemolyticus serotype O3:K6 (strain RIMD 2210633) GN=VP0845 PE=3 SV=1                                                       | 12.585034  | 64.207  | 1.20E+07 | 1.20E+07 | 1.20E+07 | 6.90E+06 | 7.30E+06 | 8.50E+06 |          |  |
| Q87RF5 | Citrate synthase OS=Vibrio parahaemolyticus serotype O3:K6 (strain RIMD 2210633) GN=VP0842 PE=3 SV=1                                                                                   | 43.8228438 | 48.188  | 1.00E+08 | 9.80E+07 | 9.20E+07 | 9.00E+07 | 6.80E+07 | 7.40E+07 |          |  |
| Q87RF8 | Phosphoglucosyltransferase OS=Vibrio parahaemolyticus serotype O3:K6 (strain RIMD 2210633) GN=VP0839 PE=3 SV=1                                                                         | 31.0218978 | 59.243  | 2.30E+07 | 2.00E+07 | 2.50E+07 | 2.60E+07 | 2.80E+07 | 2.60E+07 |          |  |
| Q87RG4 | Glutamine-tRNA ligase OS=Vibrio parahaemolyticus serotype O3:K6 (strain RIMD 2210633) GN=gluS PE=3 SV=1                                                                                | 10.4316547 | 63.929  | 7.50E+06 | 8.60E+06 | 9.70E+06 | 1.10E+07 | 1.60E+07 | 9.40E+06 |          |  |
| Q87RQ5 | PTS system, N-acetylglucosamine-specific IIABC component OS=Vibrio parahaemolyticus serotype O3:K6 (strain RIMD 2210633) GN=VP0831 PE=4 SV=1                                           | 8.41300191 | 54.543  |          |          | 1.40E+07 | 8.70E+06 | 7.80E+06 | 1.10E+07 |          |  |
| Q87RG7 | N-acetylglucosamine-6-phosphate deacetylase OS=Vibrio parahaemolyticus serotype O3:K6 (strain RIMD 2210633) GN=VP0829 PE=3 SV=1                                                        | 16.9312169 | 40.723  |          | 1.80E+07 |          | 1.80E+07 |          | 1.50E+07 |          |  |
| Q87RG8 | N-acetylglucosamine repressor OS=Vibrio parahaemolyticus serotype O3:K6 (strain RIMD 2210633) GN=VP0828 PE=4 SV=1                                                                      | 5.1980198  | 43.799  |          | 2.90E+06 | 3.40E+06 | 4.60E+06 | 4.20E+06 | 2.60E+06 |          |  |
| Q87RH0 | Asparagine synthetase B, glutamine-hydrolyzing OS=Vibrio parahaemolyticus serotype O3:K6 (strain RIMD 2210633) GN=VP0826 PE=4 SV=1                                                     | 25.631769  | 62.273  | 9.50E+06 | 8.90E+06 | 9.70E+06 | 1.50E+07 | 1.20E+07 | 9.50E+06 |          |  |
| Q87RH4 | Adenylate kinase OS=Vibrio parahaemolyticus serotype O3:K6 (strain RIMD 2210633) GN=adk PE=3 SV=1                                                                                      | 24.7663551 | 23.28   | 1.60E+07 | 1.30E+07 | 9.40E+06 | 1.10E+07 | 9.60E+06 | 1.10E+07 |          |  |
| Q87RH5 | Chaperone protein HtpG OS=Vibrio parahaemolyticus serotype O3:K6 (strain RIMD 2210633) GN=htpG PE=3 SV=1                                                                               | 13.0914826 | 72.116  | 6.30E+06 | 8.30E+06 | 8.90E+06 | 1.20E+07 |          | 6.20E+06 |          |  |
| Q87RJ7 | Cysteine synthase OS=Vibrio parahaemolyticus serotype O3:K6 (strain RIMD 2210633) GN=VP0797 PE=3 SV=1                                                                                  | 74.8447205 | 34.112  | 1.50E+08 | 1.60E+08 | 1.50E+08 | 1.50E+08 | 1.90E+08 | 1.50E+08 |          |  |
| Q87RJ9 | Phosphocarrier protein Hpr OS=Vibrio parahaemolyticus serotype O3:K6 (strain RIMD 2210633) GN=VP0795 PE=4 SV=1                                                                         | 9.41176471 | 9.103   |          |          | 2.60E+07 |          |          | 2.30E+07 |          |  |
| Q87RK0 | Phosphoenolpyruvate-protein phosphotransferase OS=Vibrio parahaemolyticus serotype O3:K6 (strain RIMD 2210633) GN=VP0794 PE=3 SV=1                                                     | 20.2090592 | 63.152  | 4.00E+06 | 1.20E+07 | 2.20E+07 | 2.30E+07 | 1.80E+07 | 1.40E+07 |          |  |
| Q87RK1 | PTS system, glucose-specific IIA component OS=Vibrio parahaemolyticus serotype O3:K6 (strain RIMD 2210633) GN=VP0793 PE=4 SV=1                                                         | 37.2781065 | 17.943  | 3.50E+07 | 3.80E+07 | 4.10E+07 | 3.40E+07 | 4.00E+07 | 3.80E+07 |          |  |
| Q87RL6 | Glutamate-tRNA ligase OS=Vibrio parahaemolyticus serotype O3:K6 (strain RIMD 2210633) GN=glx PE=3 SV=1                                                                                 | 27.4261603 | 53.42   | 1.50E+07 | 2.20E+07 | 1.50E+07 | 1.70E+07 | 1.80E+07 | 1.30E+07 |          |  |
| Q87RL8 | Putative chitropin OS=Vibrio parahaemolyticus serotype O3:K6 (strain RIMD 2210633) GN=VP0760 PE=4 SV=1                                                                                 | 20.9115282 | 40.764  |          |          |          |          | 2.00E+07 | 5.40E+07 |          |  |
| Q87RL9 | Uncharacterized protein OS=Vibrio parahaemolyticus serotype O3:K6 (strain RIMD 2210633) GN=VP0759 PE=4 SV=1                                                                            | 31.9148936 | 5.569   |          |          |          |          |          | 4.50E+06 |          |  |
| Q87RM3 | NN'-diacetylchitinase OS=Vibrio parahaemolyticus serotype O3:K6 (strain RIMD 2210633) GN=VP0755 PE=4 SV=1                                                                              | 2.94502623 | 97.595  |          |          |          |          |          | 5.10E+06 |          |  |
| Q87RNO | 2-dehydro-3-deoxyphosphocitrate aldolase OS=Vibrio parahaemolyticus serotype O3:K6 (strain RIMD 2210633) GN=kdsA PE=3 SV=1                                                             | 2.82685512 | 30.79   | 5.50E+05 | 6.70E+06 | 6.40E+06 | 7.70E+06 | 6.50E+06 | 5.40E+06 |          |  |
| Q87RN8 | Ribose-phosphate pyrophosphokinase OS=Vibrio parahaemolyticus serotype O3:K6 (strain RIMD 2210633) GN=prps PE=3 SV=1                                                                   | 42.6751592 | 33.911  | 1.80E+07 | 2.30E+07 | 2.00E+07 | 2.40E+07 | 2.10E+07 | 1.70E+07 |          |  |
| Q87RPO | Ribosome-binding ATPase YchF OS=Vibrio parahaemolyticus serotype O3:K6 (strain RIMD 2210633) GN=ychF PE=3 SV=1                                                                         | 3.13315927 | 41.769  |          |          | 4.70E+06 | 5.40E+06 |          |          |          |  |
| Q87RQ0 | Leucine-tRNA ligase OS=Vibrio parahaemolyticus serotype O3:K6 (strain RIMD 2210633) GN=leuS PE=3 SV=1                                                                                  | 15.8693116 | 96.593  | 1.00E+07 | 1.70E+07 | 1.50E+07 | 1.20E+07 | 1.50E+07 | 1.00E+07 |          |  |
| Q87R2  | Serine hydroxymethyltransferase 1 OS=Vibrio parahaemolyticus serotype O3:K6 (strain RIMD 2210633) GN=ghyA1 PE=3 SV=1                                                                   | 53.9230769 | 45.476  | 7.70E+07 | 1.10E+08 | 1.10E+08 | 1.20E+08 | 1.30E+08 | 8.40E+07 |          |  |
| Q87RS3 | Lipoprotein OS=Vibrio parahaemolyticus serotype O3:K6 (strain RIMD 2210633) GN=VP0704 PE=3 SV=1                                                                                        | 44.8096564 | 29.052  | 1.60E+07 | 1.30E+07 | 2.60E+07 | 2.00E+07 | 1.90E+07 | 1.60E+07 |          |  |
| Q87RL  | N utilization substance protein B homolog OS=Vibrio parahaemolyticus serotype O3:K6 (strain RIMD 2210633) GN=nusB PE=3 SV=1                                                            | 7.09677419 | 17.559  | 4.70E+06 |          | 4.80E+06 |          | 4.80E+06 |          |          |  |
| Q87RL4 | 6,7-dimethyl-8-ribityllumazine synthase OS=Vibrio parahaemolyticus serotype O3:K6 (strain RIMD 2210633) GN=rhb PE=3 SV=1                                                               | 53.2051282 | 16.422  | 1.40E+07 | 2.00E+07 | 2.00E+07 | 2.00E+07 | 1.90E+07 | 1.60E+07 |          |  |
| Q87RU5 | 3,4-dihydroxy-2-butanone 4-phosphate synthase OS=Vibrio parahaemolyticus serotype O3:K6 (strain RIMD 2210633) GN=ribB PE=3 SV=1                                                        | 14.6341463 | 40.086  | 7.10E+06 | 8.80E+06 | 7.00E+06 | 9.80E+06 | 9.40E+06 | 6.40E+06 |          |  |
| Q87RUG | Gamma-glutamyl phosphate reductase OS=Vibrio parahaemolyticus serotype O3:K6 (strain RIMD 2210633) GN=prpA PE=3 SV=1                                                                   | 19.7115385 | 44.665  | 6.00E+06 | 9.50E+06 | 7.40E+06 | 9.80E+06 | 1.00E+07 | 6.90E+06 |          |  |
| Q87RV5 | Aminoacyl-histidine dipeptidase OS=Vibrio parahaemolyticus serotype O3:K6 (strain RIMD 2210633) GN=VP0671 PE=4 SV=1                                                                    | 9.79591837 | 53.592  | 4.10E+06 | 2.20E+06 | 5.40E+06 | 5.00E+06 | 5.00E+06 | 4.40E+06 |          |  |
| Q87RW7 | Uncharacterized protein OS=Vibrio parahaemolyticus serotype O3:K6 (strain RIMD 2210633) GN=VP0669 PE=4 SV=1                                                                            | 26.4044944 | 39.042  | 1.60E+07 | 1.90E+07 | 1.60E+07 | 1.80E+07 | 1.60E+07 | 1.50E+07 |          |  |
| Q87RW0 | Phosphoribosylformylglycinamide synthase OS=Vibrio parahaemolyticus serotype O3:K6 (strain RIMD 2210633) GN=ppurL PE=3 SV=1                                                            | 16.0522273 | 141.597 | 4.40E+06 | 1.40E+07 | 1.40E+07 | 1.40E+07 | 1.40E+07 | 1.20E+07 |          |  |
| Q87RX2 | Chaperone protein DnaJ OS=Vibrio parahaemolyticus serotype O3:K6 (strain RIMD 2210633) GN=dnaJ PE=3 SV=1                                                                               | 3.1498063  | 41      |          |          | 4.40E+06 | 6.90E+06 | 5.20E+06 |          |          |  |
| Q87RX3 | Chaperone protein DnaK OS=Vibrio parahaemolyticus serotype O3:K6 (strain RIMD 2210633) GN=dnaK PE=3 SV=1                                                                               | 59.3406593 | 69.012  | 4.50E+07 | 4.60E+07 | 4.50E+07 | 4.90E+07 | 5.40E+07 | 4.80E+07 |          |  |
| Q87RZ5 | Homocysteine synthase OS=Vibrio parahaemolyticus serotype O3:K6 (strain RIMD 2210633) GN=VP0829 PE=3 SV=1                                                                              | 12.5592417 | 45.703  | 5.60E+06 | 6.20E+06 | 7.00E+06 | 7.60E+06 | 5.70E+06 | 4.30E+06 |          |  |
| Q87S07 | GMP synthase [glutamine-hydrolyzing] OS=Vibrio parahaemolyticus serotype O3:K6 (strain RIMD 2210633) GN=guaA PE=3 SV=1                                                                 | 10.4448743 | 57.635  | 1.10E+07 | 1.30E+07 | 1.10E+07 | 2.10E+07 | 1.60E+07 | 1.20E+07 |          |  |
| Q87S08 | Inosine-5'-monophosphate dehydrogenase OS=Vibrio parahaemolyticus serotype O3:K6 (strain RIMD 2210633) GN=guaB PE=3 SV=1                                                               | 34.2857143 | 51.913  | 1.40E+07 | 1.70E+07 | 1.60E+07 | 1.70E+07 | 2.00E+07 | 1.50E+07 |          |  |
| Q87S15 | Histidine-tRNA ligase OS=Vibrio parahaemolyticus serotype O3:K6 (strain RIMD 2210633) GN=hisS PE=3 SV=1                                                                                | 5.45023697 | 47.116  |          |          |          |          |          |          |          |  |
| Q87S21 | Peptidase B OS=Vibrio parahaemolyticus serotype O3:K6 (strain RIMD 2210633) GN=pepB PE=3 SV=1                                                                                          | 15.9722222 | 46.582  | 8.50E+06 | 8.20E+06 | 9.30E+06 | 1.20E+07 | 9.60E+06 | 9.50E+06 |          |  |
| Q87S24 | Chaperone protein HscA homolog OS=Vibrio parahaemolyticus serotype O3:K6 (strain RIMD 2210633) GN=hscA PE=3 SV=1                                                                       | 2.10698921 | 66.054  | 1.90E+06 |          | 2.00E+06 | 2.00E+06 | 2.40E+06 |          |          |  |
| Q87S28 | Cysteine desulfurase IscS OS=Vibrio parahaemolyticus serotype O3:K6 (strain RIMD 2210633) GN=iscS PE=3 SV=1                                                                            | 8.66336634 | 44.967  | 9.30E+06 | 9.60E+06 | 6.90E+06 | 7.40E+06 | 1.10E+07 | 7.00E+06 |          |  |
| Q87S35 | Uncharacterized protein OS=Vibrio parahaemolyticus serotype O3:K6 (strain RIMD 2210633) GN=VP0589 PE=4 SV=1                                                                            | 11.9266055 | 11.832  | 7.30E+06 |          | 1.10E+07 |          |          |          |          |  |
| Q87S40 | Iso citrate lyase OS=Vibrio parahaemolyticus serotype O3:K6 (strain RIMD 2210633) GN=VP0584 PE=4 SV=1                                                                                  | 7.11009174 | 48.039  |          | 7.00E+06 |          | 6.70E+06 |          | 1.10E+07 |          |  |
| Q87S44 | Antioxidant, AhpC/Tsa family OS=Vibrio parahaemolyticus serotype O3:K6 (strain RIMD 2210633) GN=VP0580 PE=4 SV=1                                                                       | 67.4876847 | 22.223  | 1.30E+08 | 1.50E+08 | 1.40E+08 | 1.40E+08 | 1.40E+08 | 1.10E+08 |          |  |
| Q87S63 | Chaperone protein ClpB OS=Vibrio parahaemolyticus serotype O3:K6 (strain RIMD 2210633) GN=clpB PE=3 SV=1                                                                               | 30.8884481 | 95.813  | 9.40E+06 | 1.60E+07 | 1.30E+07 | 1.30E+07 | 1.40E+07 | 1.30E+07 |          |  |
| Q87S68 | Putative sigma-54 modulation protein OS=Vibrio parahaemolyticus serotype O3:K6 (strain RIMD 2210633) GN=VP0556 PE=4 SV=1                                                               | 27.7777778 | 12.378  | 7.80E+06 | 9.00E+06 | 7.00E+06 | 9.70E+06 | 8.10E+06 | 3.30E+06 |          |  |
| Q87S69 | Chorismate mutase/prephenate dehydratase OS=Vibrio parahaemolyticus serotype O3:K6 (strain RIMD 2210633) GN=VP0555 PE=4 SV=1                                                           | 6.37755102 | 44.196  | 1.70E+06 | 2.60E+06 |          |          | 1.70E+06 |          |          |  |
| Q87S73 | ABC transporter, ATP-binding protein OS=Vibrio parahaemolyticus serotype O3:K6 (strain RIMD 2210633) GN=VP0551 PE=3 SV=1                                                               | 11.1711712 | 62.207  | 3.00E+06 | 4.30E+06 | 2.50E+06 | 4.30E+06 | 4.20E+06 | 3.90E+06 |          |  |
| Q87S77 | T-protein OS=Vibrio parahaemolyticus serotype O3:K6 (strain RIMD 2210633) GN=VP0547 PE=4 SV=1                                                                                          | 2.4        | 41.976  |          |          | 3.10E+06 |          |          |          |          |  |
| Q87S78 | Phospho-2-dehydro-3-deoxyheptanate aldolase OS=Vibrio parahaemolyticus serotype O3:K6 (strain RIMD 2210633) GN=VP0546 PE=3 SV=1                                                        | 1.96078431 | 39.669  |          |          | 9.60E+06 |          |          |          |          |  |
| Q87S84 | Putative carbon starvation protein A OS=Vibrio parahaemolyticus serotype O3:K6 (strain RIMD 2210633) GN=VP0540 PE=4 SV=1                                                               | 2.4291498  | 53.283  | 1.10E+07 |          |          |          |          |          |          |  |
| Q87S90 | Isoleucine-tRNA ligase OS=Vibrio parahaemolyticus serotype O3:K6 (strain RIMD 2210633) GN=ileS PE=3 SV=1                                                                               | 6.7940552  | 105.212 | 5.10E+06 | 5.00E+06 | 4.30E+06 | 4.90E+06 |          | 5.80E+06 |          |  |
| Q87S93 | 30S ribosomal protein S20 OS=Vibrio parahaemolyticus serotype O3:K6 (strain RIMD 2210633) GN=rpsT PE=3 SV=1                                                                            | 30.2325581 | 9.53    | 4.30E+06 | 7.90E+06 | 8.00E+06 |          |          |          |          |  |

|        |                                                                                                                                                    |            |        |          |          |          |          |          |          |          |  |
|--------|----------------------------------------------------------------------------------------------------------------------------------------------------|------------|--------|----------|----------|----------|----------|----------|----------|----------|--|
| Q875S0 | Acetolactate synthase OS=Vibrio parahaemolyticus serotype O3:K6 (strain RIMD 2210633) GN=VP0352 PE=3 SV=1                                          | 2.26480836 | 63.006 |          |          | 4.50E+06 |          |          |          |          |  |
| Q875S7 | 2-isopropylmalate dehydrogenase OS=Vibrio parahaemolyticus serotype O3:K6 (strain RIMD 2210633) GN=leuA PE=3 SV=1                                  | 40.9737864 | 56.105 | 1.30E+07 | 1.80E+07 | 1.20E+07 | 1.80E+07 | 1.10E+07 | 1.40E+07 |          |  |
| Q875S8 | 3-isopropylmalate dehydrogenase OS=Vibrio parahaemolyticus serotype O3:K6 (strain RIMD 2210633) GN=leuB PE=3 SV=1                                  | 42.9720266 | 39.309 | 3.20E+07 | 3.30E+07 | 3.20E+07 | 3.90E+07 | 3.20E+07 | 3.40E+07 |          |  |
| Q875S9 | 3-isopropylmalate dehydratase large subunit OS=Vibrio parahaemolyticus serotype O3:K6 (strain RIMD 2210633) GN=leuC PE=3 SV=1                      | 3.18471338 | 50.585 |          |          |          |          | 3.80E+06 |          | 3.70E+06 |  |
| Q875T4 | Chaperone SurA OS=Vibrio parahaemolyticus serotype O3:K6 (strain RIMD 2210633) GN=surA PE=3 SV=1                                                   | 2.34192037 | 47.406 |          |          | 8.00E+06 |          |          |          | 6.30E+06 |  |
| Q875U3 | 50S ribosomal protein L27 OS=Vibrio parahaemolyticus serotype O3:K6 (strain RIMD 2210633) GN=rpmL27 PE=3 SV=1                                      | 42.3529412 | 9.202  | 2.10E+07 | 2.70E+07 | 2.90E+07 | 3.10E+07 | 2.80E+07 | 3.30E+07 |          |  |
| Q875U4 | 50S ribosomal protein L21 OS=Vibrio parahaemolyticus serotype O3:K6 (strain RIMD 2210633) GN=rplJ PE=3 SV=1                                        | 60.1941748 | 11.514 | 5.00E+07 | 4.80E+07 | 5.90E+07 | 5.90E+07 | 6.40E+07 | 6.70E+07 |          |  |
| Q875U5 | Octaprenyl-diphosphate synthase OS=Vibrio parahaemolyticus serotype O3:K6 (strain RIMD 2210633) GN=VP0327 PE=3 SV=1                                | 3.3033033  | 36.368 |          |          |          |          |          |          | 2.10E+06 |  |
| Q875U7 | Malate dehydrogenase OS=Vibrio parahaemolyticus serotype O3:K6 (strain RIMD 2210633) GN=mdh PE=3 SV=1                                              | 17.7135048 | 32.152 | 1.10E+08 | 1.40E+08 | 9.80E+07 | 1.30E+08 | 8.80E+07 | 8.80E+07 |          |  |
| Q875V0 | Immunogenic protein OS=Vibrio parahaemolyticus serotype O3:K6 (strain RIMD 2210633) GN=VP0233 PE=4 SV=1                                            | 68.8440994 | 34.529 | 9.80E+07 | 1.20E+08 | 1.00E+08 | 1.20E+08 | 1.10E+08 | 9.10E+07 |          |  |
| Q875W0 | Fructose-1,6-bisphosphatase class 1 OS=Vibrio parahaemolyticus serotype O3:K6 (strain RIMD 2210633) GN=fbp PE=3 SV=1                               | 42.3076923 | 37.276 | 3.50E+07 | 3.60E+07 | 1.40E+07 | 3.10E+07 | 1.20E+07 | 1.30E+07 |          |  |
| Q875W1 | Inorganic pyrophosphatase OS=Vibrio parahaemolyticus serotype O3:K6 (strain RIMD 2210633) GN=ppa PE=3 SV=1                                         | 34.6590909 | 19.632 | 1.20E+07 | 1.80E+07 | 1.60E+07 | 1.20E+07 | 7.40E+06 | 1.20E+07 |          |  |
| Q875W6 | Peptide methionine sulfoxide reductase MsrA OS=Vibrio parahaemolyticus serotype O3:K6 (strain RIMD 2210633) GN=msrA PE=3 SV=1                      | 19.3396226 | 23.602 | 3.30E+06 | 6.50E+06 | 5.20E+06 | 3.50E+06 | 3.80E+06 | 3.80E+06 |          |  |
| Q875X0 | Uncharacterized protein OS=Vibrio parahaemolyticus serotype O3:K6 (strain RIMD 2210633) GN=VP0302 PE=4 SV=1                                        | 3.8277512  | 23.29  | 1.70E+07 | 2.20E+07 | 2.00E+07 |          |          |          |          |  |
| Q875X9 | Sulfate adenylyltransferase subunit 1 OS=Vibrio parahaemolyticus serotype O3:K6 (strain RIMD 2210633) GN=cysN PE=3 SV=1                            | 22.6890756 | 52.562 | 1.50E+07 | 1.60E+07 | 1.60E+07 | 1.70E+07 | 2.40E+07 | 1.40E+07 |          |  |
| Q875Y0 | Sulfate adenylyltransferase subunit 2 OS=Vibrio parahaemolyticus serotype O3:K6 (strain RIMD 2210633) GN=cysD PE=3 SV=1                            | 11.2582781 | 34.961 | 1.30E+07 | 1.10E+07 | 8.20E+06 | 9.70E+06 | 1.40E+07 | 1.50E+07 |          |  |
| Q875Y1 | Uroporphyrin-III C-methyltransferase OS=Vibrio parahaemolyticus serotype O3:K6 (strain RIMD 2210633) GN=VP0291 PE=3 SV=1                           | 3.61842105 | 32.997 |          |          |          |          | 5.80E+06 | 7.40E+06 |          |  |
| Q875Y2 | 2',3'-cyclic-nucleotide 2'-phosphodiesterase OS=Vibrio parahaemolyticus serotype O3:K6 (strain RIMD 2210633) GN=VP0290 PE=3 SV=1                   | 6.75883257 | 72.077 | 1.40E+07 |          | 1.90E+07 | 1.10E+07 |          | 3.10E+06 |          |  |
| Q875Y7 | Peptidyl-prolyl cis-trans isomerase OS=Vibrio parahaemolyticus serotype O3:K6 (strain RIMD 2210633) GN=VP0285 PE=4 SV=1                            | 6.31067961 | 21.826 | 8.60E+06 |          | 1.10E+07 |          | 1.20E+07 | 9.70E+06 |          |  |
| Q875Y9 | 50S ribosomal protein L17 OS=Vibrio parahaemolyticus serotype O3:K6 (strain RIMD 2210633) GN=rplQ PE=3 SV=1                                        | 46.8253968 | 14.194 | 5.00E+07 | 5.10E+07 | 5.10E+07 | 6.10E+07 | 6.50E+07 | 6.40E+07 |          |  |
| Q875Z0 | DNA-directed RNA polymerase subunit alpha OS=Vibrio parahaemolyticus serotype O3:K6 (strain RIMD 2210633) GN=rpoA PE=3 SV=1                        | 44.2424242 | 36.45  | 4.20E+07 | 4.40E+07 | 4.80E+07 | 4.40E+07 | 5.10E+07 | 4.10E+07 |          |  |
| Q875Z1 | 30S ribosomal protein S4 OS=Vibrio parahaemolyticus serotype O3:K6 (strain RIMD 2210633) GN=rpsD PE=3 SV=1                                         | 65.0485437 | 23.319 | 8.50E+07 | 8.90E+07 | 1.00E+08 | 9.40E+07 | 1.20E+08 | 9.20E+07 |          |  |
| Q875Z2 | 30S ribosomal protein S13 OS=Vibrio parahaemolyticus serotype O3:K6 (strain RIMD 2210633) GN=rpsM PE=3 SV=1                                        | 63.559322  | 13.282 | 5.90E+07 | 5.40E+07 | 7.80E+07 | 8.20E+07 | 8.30E+07 | 7.60E+07 |          |  |
| Q875Z4 | 50S ribosomal protein L15 OS=Vibrio parahaemolyticus serotype O3:K6 (strain RIMD 2210633) GN=rplO PE=3 SV=1                                        | 47.2222222 | 14.944 | 3.70E+07 | 3.70E+07 | 4.20E+07 | 5.10E+07 | 5.50E+07 | 5.20E+07 |          |  |
| Q875Z5 | 50S ribosomal protein L30 OS=Vibrio parahaemolyticus serotype O3:K6 (strain RIMD 2210633) GN=rplM PE=3 SV=1                                        | 24.137931  | 6.58   | 1.50E+07 | 2.10E+07 | 2.20E+07 | 1.90E+07 | 2.50E+07 | 1.40E+07 |          |  |
| Q875Z6 | 30S ribosomal protein S5 OS=Vibrio parahaemolyticus serotype O3:K6 (strain RIMD 2210633) GN=rpsE PE=3 SV=1                                         | 73.6256946 | 17.556 | 7.80E+07 | 6.50E+07 | 8.80E+07 | 9.10E+07 | 1.00E+08 | 9.30E+07 |          |  |
| Q875Z7 | 50S ribosomal protein L18 OS=Vibrio parahaemolyticus serotype O3:K6 (strain RIMD 2210633) GN=rplR PE=3 SV=1                                        | 57.2649573 | 12.608 | 4.20E+07 | 4.70E+07 | 5.20E+07 | 5.40E+07 | 6.20E+07 | 4.90E+07 |          |  |
| Q875Z8 | 50S ribosomal protein L6 OS=Vibrio parahaemolyticus serotype O3:K6 (strain RIMD 2210633) GN=rplF PE=3 SV=1                                         | 72.3163842 | 18.767 | 5.80E+07 | 6.50E+07 | 7.50E+07 | 7.80E+07 | 8.00E+07 | 7.80E+07 |          |  |
| Q875Z9 | 30S ribosomal protein S8 OS=Vibrio parahaemolyticus serotype O3:K6 (strain RIMD 2210633) GN=rpsH PE=3 SV=1                                         | 40         | 13.999 | 3.40E+07 | 3.50E+07 | 4.10E+07 | 5.70E+07 | 3.90E+07 | 4.10E+07 |          |  |
| Q87700 | 30S ribosomal protein S14 OS=Vibrio parahaemolyticus serotype O3:K6 (strain RIMD 2210633) GN=rpsN PE=3 SV=1                                        | 6.93069307 | 11.419 | 8.80E+06 | 1.50E+07 | 9.90E+06 | 1.20E+07 | 1.60E+07 | 1.10E+07 |          |  |
| Q87701 | 50S ribosomal protein L5 OS=Vibrio parahaemolyticus serotype O3:K6 (strain RIMD 2210633) GN=rplE PE=3 SV=1                                         | 80.4469274 | 20.118 | 7.80E+07 | 8.70E+07 | 9.70E+07 | 1.00E+08 | 9.40E+07 | 9.50E+07 |          |  |
| Q87702 | 50S ribosomal protein L24 OS=Vibrio parahaemolyticus serotype O3:K6 (strain RIMD 2210633) GN=rplX PE=3 SV=1                                        | 20         | 11.224 | 6.50E+07 | 2.70E+07 | 3.30E+07 | 6.50E+07 | 3.60E+07 | 8.00E+07 |          |  |
| Q87703 | 50S ribosomal protein L14 OS=Vibrio parahaemolyticus serotype O3:K6 (strain RIMD 2210633) GN=rplN PE=3 SV=1                                        | 43.9024399 | 13.564 | 2.10E+07 | 3.50E+07 | 4.00E+07 | 3.70E+07 | 4.10E+07 | 2.80E+07 |          |  |
| Q87705 | 50S ribosomal protein L29 OS=Vibrio parahaemolyticus serotype O3:K6 (strain RIMD 2210633) GN=rplM PE=3 SV=1                                        | 46.031746  | 7.189  | 1.20E+07 | 1.80E+07 | 1.90E+07 | 2.10E+06 | 3.50E+06 | 1.60E+07 |          |  |
| Q87706 | 50S ribosomal protein L16 OS=Vibrio parahaemolyticus serotype O3:K6 (strain RIMD 2210633) GN=rplP PE=3 SV=1                                        | 30.1470588 | 15.516 | 4.20E+07 | 4.60E+07 | 4.60E+07 | 5.80E+07 | 5.30E+07 | 5.70E+07 |          |  |
| Q87707 | 30S ribosomal protein S3 OS=Vibrio parahaemolyticus serotype O3:K6 (strain RIMD 2210633) GN=rpsC PE=3 SV=1                                         | 51.2931034 | 25.665 | 6.90E+07 | 6.30E+07 | 7.40E+07 | 9.10E+07 | 8.40E+07 | 9.00E+07 |          |  |
| Q87708 | 50S ribosomal protein L22 OS=Vibrio parahaemolyticus serotype O3:K6 (strain RIMD 2210633) GN=rplV PE=3 SV=1                                        | 60         | 12.078 | 3.50E+07 | 4.50E+07 | 5.80E+07 | 5.90E+07 | 4.80E+07 | 6.00E+07 |          |  |
| Q87709 | 30S ribosomal protein S19 OS=Vibrio parahaemolyticus serotype O3:K6 (strain RIMD 2210633) GN=rpsS PE=3 SV=1                                        | 47.826807  | 10.421 | 2.40E+07 | 1.90E+07 | 2.50E+07 | 1.60E+07 | 2.70E+07 | 2.70E+07 |          |  |
| Q87710 | 50S ribosomal protein L2 OS=Vibrio parahaemolyticus serotype O3:K6 (strain RIMD 2210633) GN=rplB PE=3 SV=1                                         | 13.8686131 | 29.931 |          |          | 5.40E+06 | 7.90E+06 | 8.70E+06 | 1.30E+07 | 7.50E+06 |  |
| Q87711 | 50S ribosomal protein L23 OS=Vibrio parahaemolyticus serotype O3:K6 (strain RIMD 2210633) GN=rplW PE=3 SV=1                                        | 36         | 11.121 | 3.60E+07 | 3.10E+07 | 4.00E+07 | 4.30E+07 | 3.80E+07 | 4.90E+07 |          |  |
| Q87712 | 50S ribosomal protein L4 OS=Vibrio parahaemolyticus serotype O3:K6 (strain RIMD 2210633) GN=rplD PE=3 SV=1                                         | 53         | 21.875 | 5.60E+07 | 7.40E+07 | 7.30E+07 | 8.50E+07 | 7.40E+07 | 7.20E+07 |          |  |
| Q87713 | 50S ribosomal protein L3 OS=Vibrio parahaemolyticus serotype O3:K6 (strain RIMD 2210633) GN=rplC PE=3 SV=1                                         | 49.7607566 | 22.36  | 6.40E+07 | 7.90E+07 | 8.30E+07 | 8.50E+07 | 9.20E+07 | 6.80E+07 |          |  |
| Q87718 | Transcriptional repressor, LacI family OS=Vibrio parahaemolyticus serotype O3:K6 (strain RIMD 2210633) GN=VP0252 PE=4 SV=1                         | 5.97014925 | 38.812 |          |          |          |          | 2.70E+06 | 2.30E+06 |          |  |
| Q87721 | ATP-dependent protease ATPase subunit HslU OS=Vibrio parahaemolyticus serotype O3:K6 (strain RIMD 2210633) GN=hslU PE=3 SV=1                       | 12.4153499 | 49.849 | 7.10E+06 | 7.80E+06 | 8.10E+06 | 1.00E+07 | 1.10E+07 | 1.10E+07 |          |  |
| Q87731 | Triosephosphate isomerase OS=Vibrio parahaemolyticus serotype O3:K6 (strain RIMD 2210633) GN=tpiA PE=3 SV=1                                        | 23.046875  | 26.916 | 2.00E+07 | 3.20E+07 | 2.40E+07 | 2.70E+07 | 2.90E+07 | 2.10E+07 |          |  |
| Q87733 | UTP--glucose-1-phosphate uridylyltransferase OS=Vibrio parahaemolyticus serotype O3:K6 (strain RIMD 2210633) GN=VP0237 PE=3 SV=1                   | 7.53424658 | 32.304 |          |          |          |          | 5.80E+06 |          |          |  |
| Q87734 | Nucleotide sugar dehydrogenase OS=Vibrio parahaemolyticus serotype O3:K6 (strain RIMD 2210633) GN=VP0236 PE=3 SV=1                                 | 25.5154639 | 43.139 | 1.40E+07 | 2.30E+07 | 2.20E+07 | 2.20E+07 | 1.90E+07 | 1.50E+07 |          |  |
| Q87736 | Pilin glycosylation protein OS=Vibrio parahaemolyticus serotype O3:K6 (strain RIMD 2210633) GN=VP0234 PE=3 SV=1                                    | 45.0127877 | 43.373 | 3.90E+07 | 4.30E+07 | 4.30E+07 | 4.30E+07 | 4.80E+07 | 3.70E+07 |          |  |
| Q87738 | Putative carbamoylphosphate synthase large subunit, short form OS=Vibrio parahaemolyticus serotype O3:K6 (strain RIMD 2210633) GN=VP0232 PE=4 SV=1 | 13.3956386 | 36.419 | 9.40E+06 | 1.90E+07 | 1.70E+07 | 8.70E+06 | 1.60E+07 | 1.60E+07 |          |  |
| Q87741 | dTDP-4-dehydroxymouse 3,5-epimerase OS=Vibrio parahaemolyticus serotype O3:K6 (strain RIMD 2210633) GN=VP0229 PE=4 SV=1                            | 22.9946524 | 21.226 | 4.80E+06 | 6.40E+06 | 4.90E+06 | 1.30E+07 | 5.40E+06 |          |          |  |
| Q87746 | Putative dTDP-4-dehydroxymouse reductase OS=Vibrio parahaemolyticus serotype O3:K6 (strain RIMD 2210633) GN=VP0224 PE=4 SV=1                       | 22.0689655 | 32.437 | 8.30E+06 | 6.70E+06 | 5.60E+06 | 7.80E+06 | 5.40E+06 | 7.80E+06 |          |  |
| Q87747 | Glucose-1-phosphate thymidyltransferase OS=Vibrio parahaemolyticus serotype O3:K6 (strain RIMD 2210633) GN=VP0223 PE=3 SV=1                        | 21.6494845 | 32.254 | 6.70E+06 | 1.00E+07 | 4.60E+06 |          | 5.90E+06 | 4.00E+06 |          |  |
| Q87748 | dTDP-glucose 4,6-dehydratase OS=Vibrio parahaemolyticus serotype O3:K6 (strain RIMD 2210633) GN=VP0222 PE=3 SV=1                                   | 16.8508287 | 40.888 | 1.40E+07 | 2.90E+07 | 2.70E+07 | 2.70E+07 | 7.80E+06 | 2.10E+07 |          |  |
| Q87756 | ADP-L-glycero-D-manno-heptose-6-epimerase OS=Vibrio parahaemolyticus serotype O3:K6 (strain RIMD 2210633) GN=hhd PE=3 SV=1                         | 7.34824281 | 35.194 | 6.20E+06 | 5.60E+06 |          |          | 9.00E+06 | 5.30E+06 |          |  |
| Q87763 | Putative oxidoreductase (Flagellin modification) OS=Vibrio parahaemolyticus serotype O3:K6 (strain RIMD 2210633) GN=VP0207 PE=4 SV=1               | 7.90513834 | 27.406 |          |          |          | 1.10E+07 |          |          |          |  |
| Q87764 | Putative amidohydrolyase OS=Vibrio parahaemolyticus serotype O3:K6 (strain RIMD 2210633) GN=VP0206 PE=4 SV=1                                       | 3.32103321 | 30.668 | 2.90E+06 | 4.10E+06 | 4.20E+06 | 4.50E+06 | 4.10E+06 |          |          |  |
| Q87765 | Putative glutamate-1-semialdehyde 2,1-aminomutase OS=Vibrio parahaemolyticus serotype O3:K6 (strain RIMD 2210633) GN=VP0205 PE=3 SV=1              | 18.6788155 | 48.884 | 9.80E+06 | 8.00E+06 | 1.20E+07 | 9.00E+06 | 8.70E+06 | 1.10E+07 |          |  |
| Q87766 | Putative 3-chlorobenzoate-3,4-dioxygenase related protein OS=Vibrio parahaemolyticus serotype O3:K6 (strain RIMD 2210633) GN=VP0204 PE=4 SV=1      | 10.787172  | 38.51  | 9.80E+06 | 1.50E+07 | 1.30E+07 | 1.20E+07 | 1.30E+07 | 8.60E+06 |          |  |
| Q87784 | 50S ribosomal protein L33 OS=Vibrio parahaemolyticus serotype O3:K6 (strain RIMD 2210633) GN=rplM PE=3 SV=1                                        | 26.7857143 | 6.52   | 2.10E+06 |          | 1.80E+07 |          | 1.70E+07 |          |          |  |
| Q87785 | 50S ribosomal protein L28 OS=Vibrio parahaemolyticus serotype O3:K6 (strain RIMD 2210633) GN=rplM PE=3 SV=1                                        | 52.5641026 | 9.026  | 3.70E+07 | 3.40E+07 | 2.90E+07 | 4.30E+07 | 4.70E+07 | 3.70E+07 |          |  |
| Q87793 | Ribonuclease PH OS=Vibrio parahaemolyticus serotype O3:K6 (strain RIMD 2210633) GN=rph PE=3 SV=1                                                   | 4.62184874 | 25.637 |          |          | 6.60E+06 | 5.00E+06 |          |          |          |  |
| Q87798 | Putative binding protein component of ABC transporter OS=Vibrio parahaemolyticus serotype O3:K6 (strain RIMD 2210633) GN=VP0172 PE=4 SV=1          | 1.80921053 | 69.617 | 7.30E+06 | 1.00E+07 | 8.30E+06 | 7.90E+06 | 8.30E+06 | 9.00E+06 |          |  |
| Q877A4 | Putative TolR OS=Vibrio parahaemolyticus serotype O3:K6 (strain RIMD 2210633) GN=VP0166 PE=3 SV=1                                                  | 2.64900662 | 49.324 |          |          |          | 5.40E+06 |          |          |          |  |
| Q877A7 | Uncharacterized protein OS=Vibrio parahaemolyticus serotype O3:K6 (strain RIMD 2210633) GN=VP0162 PE=4 SV=1                                        | 2.72277228 | 45.497 | 1.40E+07 |          | 7.40E+06 | 4.90E+06 | 6.90E+06 | 1.50E+07 |          |  |
| Q877E1 | Phosphoenolpyruvate carboxylase [ATP] OS=Vibrio parahaemolyticus serotype O3:K6 (strain RIMD 2210633) GN=pcckA PE=3 SV=1                           | 66.05      |        |          |          |          |          |          |          |          |  |



Table S1

|        |                                                                                                                                                                                       |            |          |          |          |          |          |          |          |
|--------|---------------------------------------------------------------------------------------------------------------------------------------------------------------------------------------|------------|----------|----------|----------|----------|----------|----------|----------|
| Q87GB6 | Maltose ABC transporter, periplasmic maltose-binding protein OS=Vibrio parahaemolyticus serotype O3:K6 (strain RIMD 2210633) GN=VPA1401 PE=4 SV=1                                     | 5.6122449  | 4.21E+01 | 2.40E+06 | 3.20E+06 | 2.60E+06 | 2.00E+06 | 2.80E+06 | 2.50E+06 |
| Q87GK7 | Uncharacterized protein OS=Vibrio parahaemolyticus serotype O3:K6 (strain RIMD 2210633) GN=VPA1308 PE=4 SV=1                                                                          | 22.1052632 | 42.312   | 1.70E+07 | 1.90E+07 | 2.20E+07 | 1.40E+07 | 1.40E+07 | 1.70E+07 |
| Q87GW2 | Uncharacterized protein OS=Vibrio parahaemolyticus serotype O3:K6 (strain RIMD 2210633) GN=VPA1203 PE=4 SV=1                                                                          | 49.5652174 | 1.31E+01 | 1.50E+07 | 1.30E+07 | 2.00E+07 | 2.00E+07 | 2.20E+07 | 1.70E+07 |
| Q87GW3 | Polyhydroxyalkanoic acid synthase OS=Vibrio parahaemolyticus serotype O3:K6 (strain RIMD 2210633) GN=VPA1202 PE=4 SV=1                                                                | 3.04568528 | 6.72E+01 | 4.20E+06 | 7.30E+06 |          |          |          |          |
| Q87GX9 | Outer membrane protein OmpA OS=Vibrio parahaemolyticus serotype O3:K6 (strain RIMD 2210633) GN=VPA1186 PE=3 SV=1                                                                      | 18.2370821 | 3.60E+01 | 6.60E+06 | 9.00E+06 | 7.80E+06 | 7.80E+06 | 7.90E+06 | 7.40E+06 |
| Q87H4  | Ferric aerobactin receptor OS=Vibrio parahaemolyticus serotype O3:K6 (strain RIMD 2210633) GN=VPA0979 PE=3 SV=1                                                                       | 5.10344828 | 7.92E+01 | 2.50E+06 | 4.40E+06 | 3.60E+06 | 3.40E+06 |          | 3.40E+06 |
| Q87HP1 | NAD(P) transhydrogenase subunit alpha OS=Vibrio parahaemolyticus serotype O3:K6 (strain RIMD 2210633) GN=VPA0922 PE=3 SV=1                                                            | 12.3552124 | 54.772   | 5.80E+06 | 5.40E+06 | 4.20E+06 |          | 4.60E+06 | 3.90E+06 |
| Q87HS4 | Heme transport protein HtaA OS=Vibrio parahaemolyticus serotype O3:K6 (strain RIMD 2210633) GN=VPA0882 PE=3 SV=1                                                                      | 22.8551227 | 7.73E+01 | 9.30E+06 | 1.60E+07 | 1.60E+07 | 1.10E+07 | 1.40E+07 | 1.30E+07 |
| Q87IE2 | Putative F-regulated protein B OS=Vibrio parahaemolyticus serotype O3:K6 (strain RIMD 2210633) GN=VPA0684 PE=3 SV=1                                                                   | 1.49700599 | 7.42E+01 |          |          | 5.70E+05 |          |          |          |
| Q87J28 | ExbB-like protein OS=Vibrio parahaemolyticus serotype O3:K6 (strain RIMD 2210633) GN=VPA0425 PE=3 SV=1                                                                                | 5.2173913  | 2.48E+01 |          |          | 1.10E+06 |          |          |          |
| Q87JD5 | Putative outer membrane protein OmpV OS=Vibrio parahaemolyticus serotype O3:K6 (strain RIMD 2210633) GN=VPA0318 PE=4 SV=1                                                             | 4.65116279 | 2.81E+01 | 5.60E+06 | 5.80E+06 | 8.50E+06 | 6.40E+06 | 7.90E+06 | 6.60E+06 |
| Q87JT2 | Putative outer membrane protein OS=Vibrio parahaemolyticus serotype O3:K6 (strain RIMD 2210633) GN=VPA0166 PE=4 SV=1                                                                  | 11.4613181 | 3.80E+01 | 2.70E+07 | 4.00E+07 | 3.60E+07 | 3.50E+07 | 3.80E+07 | 2.80E+07 |
| Q87JU6 | Biopolymer transport protein ExbB-related protein OS=Vibrio parahaemolyticus serotype O3:K6 (strain RIMD 2210633) GN=VPA0152 PE=3 SV=1                                                | 5.71428571 | 4.92E+01 | 1.50E+06 | 3.80E+06 | 2.20E+06 | 2.00E+06 | 2.00E+06 | 3.40E+06 |
| Q87K02 | Outer membrane protein OmpW OS=Vibrio parahaemolyticus serotype O3:K6 (strain RIMD 2210633) GN=VPA0096 PE=4 SV=1                                                                      | 6.54205607 | 2.35E+01 | 1.00E+07 | 8.00E+06 | 1.40E+07 | 4.20E+06 | 1.10E+07 | 9.20E+06 |
| Q87K95 | Peptide ABC transporter, ATP-binding protein OS=Vibrio parahaemolyticus serotype O3:K6 (strain RIMD 2210633) GN=VPA0003 PE=3 SV=1                                                     | 3.87096774 | 3.49E+01 |          |          |          |          |          |          |
| Q87KA3 | ATP synthase subunit a OS=Vibrio parahaemolyticus serotype O3:K6 (strain RIMD 2210633) GN=atpB PE=3 SV=1                                                                              | 2.96296296 | 3.01E+01 |          |          |          |          |          |          |
| Q87KA4 | ATP synthase subunit b OS=Vibrio parahaemolyticus serotype O3:K6 (strain RIMD 2210633) GN=atpB PE=3 SV=1                                                                              | 43.5897436 | 1.75E+01 | 7.00E+06 | 6.40E+06 | 8.50E+06 | 7.70E+06 | 8.00E+06 | 7.90E+06 |
| Q87KA6 | ATP synthase subunit alpha OS=Vibrio parahaemolyticus serotype O3:K6 (strain RIMD 2210633) GN=atpA PE=3 SV=1                                                                          | 31.5487572 | 5.66E+01 | 7.30E+06 | 7.70E+06 | 7.00E+06 | 8.10E+06 | 9.90E+06 | 6.30E+06 |
| Q87KA8 | ATP synthase subunit beta OS=Vibrio parahaemolyticus serotype O3:K6 (strain RIMD 2210633) GN=atpD PE=3 SV=1                                                                           | 23.5546039 | 5.07E+01 | 5.60E+06 | 7.40E+06 | 6.70E+06 | 9.00E+06 | 1.00E+07 | 5.00E+06 |
| Q87K17 | Putative uroporphyrin-III C-methyltransferase OS=Vibrio parahaemolyticus serotype O3:K6 (strain RIMD 2210633) GN=VP2990 PE=4 SV=1                                                     | 2.48138958 | 4.51E+01 | 1.00E+06 | 1.20E+06 | 8.00E+05 |          |          |          |
| Q87K9N | Vitamin B12 transporter BtuB OS=Vibrio parahaemolyticus serotype O3:K6 (strain RIMD 2210633) GN=btuB PE=3 SV=1                                                                        | 3.20512821 | 6.93E+01 | 7.60E+05 | 1.60E+06 | 1.70E+06 | 1.50E+06 | 9.70E+05 | 1.90E+06 |
| Q87KQ1 | 50S ribosomal protein L1 OS=Vibrio parahaemolyticus serotype O3:K6 (strain RIMD 2210633) GN=rplA PE=3 SV=1                                                                            | 16.7381974 | 2.47E+01 | 5.40E+06 | 5.40E+06 | 5.00E+06 | 5.40E+06 | 7.90E+06 | 5.10E+06 |
| Q87KQ2 | 50S ribosomal protein L10 OS=Vibrio parahaemolyticus serotype O3:K6 (strain RIMD 2210633) GN=rplJ PE=3 SV=1                                                                           | 13.5802469 | 1.73E+01 |          |          | 9.50E+05 |          |          | 1.70E+06 |
| Q87KQ3 | 50S ribosomal protein L7/L12 OS=Vibrio parahaemolyticus serotype O3:K6 (strain RIMD 2210633) GN=rplL PE=3 SV=1                                                                        | 9.01639444 | 12.184   | 1.80E+06 |          | 1.90E+06 |          |          | 2.00E+06 |
| Q87KQ4 | DNA-directed RNA polymerase subunit beta OS=Vibrio parahaemolyticus serotype O3:K6 (strain RIMD 2210633) GN=rpoB PE=3 SV=1                                                            | 0.96870343 | 1.49E+02 |          |          | 5.00E+05 |          |          |          |
| Q87KR5 | DNA-binding protein HU-2 OS=Vibrio parahaemolyticus serotype O3:K6 (strain RIMD 2210633) GN=VP2911 PE=3 SV=1                                                                          | 16.4835165 | 9.50E+00 | 3.20E+06 |          |          |          |          |          |
| Q87KT2 | Fumarate hydratase class II OS=Vibrio parahaemolyticus serotype O3:K6 (strain RIMD 2210633) GN=fumC PE=3 SV=1                                                                         | 9.97830003 | 4.87E+01 |          | 8.50E+05 |          | 2.10E+06 |          | 1.10E+06 |
| Q87KX4 | Uncharacterized protein OS=Vibrio parahaemolyticus serotype O3:K6 (strain RIMD 2210633) GN=VP2850 PE=4 SV=1                                                                           | 13.6125654 | 20.214   |          | 1.30E+06 | 3.10E+06 | 1.70E+06 |          | 1.20E+06 |
| Q87L38 | Peptidyl-prolyl cis-trans isomerase OS=Vibrio parahaemolyticus serotype O3:K6 (strain RIMD 2210633) GN=VP2778 PE=4 SV=1                                                               | 21.1538462 | 2.83E+01 | 4.90E+06 | 6.90E+06 | 5.50E+06 | 4.90E+06 | 8.00E+06 | 4.00E+06 |
| Q87L72 | 30S ribosomal protein S6 OS=Vibrio parahaemolyticus serotype O3:K6 (strain RIMD 2210633) GN=rpsF PE=3 SV=1                                                                            | 8.52713178 | 14.974   |          |          |          | 3.50E+06 |          |          |
| Q87L75 | 50S ribosomal protein L9 OS=Vibrio parahaemolyticus serotype O3:K6 (strain RIMD 2210633) GN=rplP PE=3 SV=1                                                                            | 24.6666667 | 1.57E+01 |          | 1.90E+06 | 3.00E+06 | 3.70E+06 | 4.20E+06 | 3.90E+06 |
| Q87LB4 | Putative V10 pilin OS=Vibrio parahaemolyticus serotype O3:K6 (strain RIMD 2210633) GN=VP2898 PE=4 SV=1                                                                                | 31.5151515 | 1.68E+01 | 1.80E+07 | 2.50E+07 | 2.40E+07 | 3.00E+07 | 2.30E+07 | 2.40E+07 |
| Q87LH6 | Permease IIC component OS=Vibrio parahaemolyticus serotype O3:K6 (strain RIMD 2210633) GN=VP2636 PE=4 SV=1                                                                            | 10.9619687 | 4.87E+01 |          |          |          |          | 2.10E+07 | 1.30E+07 |
| Q87LH8 | <i>β</i> -phospho- <i>β</i> -glucosidase OS=Vibrio parahaemolyticus serotype O3:K6 (strain RIMD 2210633) GN=VP2634 PE=3 SV=1                                                          | 3.63636364 | 4.83E+01 |          |          |          |          | 2.90E+06 |          |
| Q87LL3 | Uncharacterized protein OS=Vibrio parahaemolyticus serotype O3:K6 (strain RIMD 2210633) GN=VP2598 PE=4 SV=1                                                                           | 6.59722222 | 3.10E+01 |          |          |          | 8.70E+05 |          |          |
| Q87LQ0 | Enolase OS=Vibrio parahaemolyticus serotype O3:K6 (strain RIMD 2210633) GN=enp PE=3 SV=1                                                                                              | 13.949192  | 4.55E+01 | 2.00E+06 |          |          | 2.70E+06 | 3.10E+06 | 2.10E+06 |
| Q87LR7 | Oxaloacetate decarboxylase, alpha subunit OS=Vibrio parahaemolyticus serotype O3:K6 (strain RIMD 2210633) GN=VP2544 PE=4 SV=1                                                         | 5.21008403 | 6.42E+01 | 6.70E+05 |          | 7.00E+06 | 6.70E+06 | 4.50E+06 | 6.50E+06 |
| Q87L1  | 50S ribosomal protein L19 OS=Vibrio parahaemolyticus serotype O3:K6 (strain RIMD 2210633) GN=rplS PE=3 SV=2                                                                           | 10.2564103 | 1.32E+01 |          |          |          | 2.70E+06 | 2.70E+06 | 1.70E+06 |
| Q87LU2 | Pyruvate dehydrogenase E1 component OS=Vibrio parahaemolyticus serotype O3:K6 (strain RIMD 2210633) GN=VP2519 PE=4 SV=1                                                               | 2.367531   | 99.601   | 2.60E+06 | 3.80E+06 | 2.50E+06 | 2.40E+06 | 3.50E+06 |          |
| Q87LU3 | Acetyltransferase component of pyruvate dehydrogenase complex OS=Vibrio parahaemolyticus serotype O3:K6 (strain RIMD 2210633) GN=VP2518 PE=3 SV=1                                     | 1.75438596 | 6.49E+01 |          | 4.90E+06 |          | 3.80E+06 | 3.70E+06 | 2.60E+06 |
| Q87LZ1 | Outer membrane protein U OS=Vibrio parahaemolyticus serotype O3:K6 (strain RIMD 2210633) GN=ompU PE=3 SV=1                                                                            | 20.4747774 | 3.63E+01 | 2.20E+07 | 3.60E+07 | 3.30E+07 | 2.90E+07 | 1.80E+07 | 2.10E+07 |
| Q87LZ5 | ATP-dependent zinc metalloprotease FtsH OS=Vibrio parahaemolyticus serotype O3:K6 (strain RIMD 2210633) GN=ftsH PE=3 SV=1                                                             | 6.49546828 | 7.29E+01 |          | 3.20E+06 | 4.70E+06 |          | 4.10E+06 | 2.50E+06 |
| Q87M06 | Polyribonucleotide nucleotidyltransferase OS=Vibrio parahaemolyticus serotype O3:K6 (strain RIMD 2210633) GN=pnp PE=3 SV=1                                                            | 6.89170183 | 76.891   |          | 3.00E+06 | 9.90E+05 |          | 1.70E+06 |          |
| Q87MA6 | Na <sup>+</sup> -translocating NADH-quinone reductase subunit A OS=Vibrio parahaemolyticus serotype O3:K6 (strain RIMD 2210633) GN=nqrA PE=3 SV=1                                     | 2.91479821 | 4.86E+01 | 1.30E+06 |          | 3.00E+06 | 2.70E+06 | 2.60E+06 | 2.90E+06 |
| Q87MD8 | 30S ribosomal protein S2 OS=Vibrio parahaemolyticus serotype O3:K6 (strain RIMD 2210633) GN=rpsB PE=3 SV=1                                                                            | 12.8099174 | 2.68E+01 |          |          |          | 1.80E+06 | 1.00E+06 |          |
| Q87MS4 | Glyceraldehyde-3-phosphate dehydrogenase OS=Vibrio parahaemolyticus serotype O3:K6 (strain RIMD 2210633) GN=VP2157 PE=3 SV=1                                                          | 20.2416918 | 3.52E+01 | 4.30E+06 | 5.90E+06 | 6.70E+06 | 7.30E+06 | 5.50E+06 | 5.70E+06 |
| Q87MY5 | Oligopeptide ABC transporter, periplasmic oligopeptide-binding protein OS=Vibrio parahaemolyticus serotype O3:K6 (strain RIMD 2210633) GN=VP2091 PE=4 SV=1                            | 17.0556553 | 6.23E+01 | 6.90E+06 | 1.30E+07 | 1.00E+07 | 1.10E+07 | 9.90E+06 | 9.10E+06 |
| Q87N29 | PTS system, glucose-specific IIBC component OS=Vibrio parahaemolyticus serotype O3:K6 (strain RIMD 2210633) GN=VP2046 PE=4 SV=1                                                       | 11.3445378 | 4.94E+01 | 1.30E+07 | 1.20E+07 | 1.30E+07 | 1.40E+07 | 9.60E+06 | 8.80E+06 |
| Q87N45 | 30S ribosomal protein S1 OS=Vibrio parahaemolyticus serotype O3:K6 (strain RIMD 2210633) GN=VP2030 PE=3 SV=1                                                                          | 5.57553957 | 6.09E+01 |          | 2.80E+06 |          | 3.20E+06 | 3.10E+06 | 3.50E+06 |
| Q87N76 | Uncharacterized protein OS=Vibrio parahaemolyticus serotype O3:K6 (strain RIMD 2210633) GN=VP1999 PE=4 SV=1                                                                           | 2.65251989 | 4.02E+01 |          | 1.30E+06 |          |          | 1.30E+06 |          |
| Q87NA1 | 5-methyltetrahydropteroylglutamate-homocysteine methyltransferase OS=Vibrio parahaemolyticus serotype O3:K6 (strain RIMD 2210633) GN=metE PE=3 SV=1                                   | 3.81578947 | 8.47E+01 |          |          | 2.70E+06 | 2.00E+06 | 2.70E+06 | 2.90E+06 |
| Q87PF9 | Cytochrome c oxidase, subunit CcoO OS=Vibrio parahaemolyticus serotype O3:K6 (strain RIMD 2210633) GN=VP1543 PE=4 SV=1                                                                | 4.85436893 | 2.36E+01 |          |          |          |          |          | 1.00E+06 |
| Q87Q03 | Oligopeptide ABC transporter, periplasmic oligopeptide-binding protein OS=Vibrio parahaemolyticus serotype O3:K6 (strain RIMD 2210633) GN=VP1347 PE=4 SV=1                            | 1.67910448 | 6.03E+01 | 3.90E+06 | 7.90E+06 | 6.40E+06 | 4.80E+06 | 5.40E+06 | 5.80E+06 |
| Q87Q07 | Uncharacterized protein OS=Vibrio parahaemolyticus serotype O3:K6 (strain RIMD 2210633) GN=VP1243 PE=4 SV=1                                                                           | 7.87308663 | 1.98E+01 |          |          | 3.60E+06 | 3.80E+06 |          | 2.70E+06 |
| Q87Q15 | Uncharacterized protein OS=Vibrio parahaemolyticus serotype O3:K6 (strain RIMD 2210633) GN=VP1164 PE=4 SV=1                                                                           | 1.73267327 | 43.849   |          |          | 1.80E+06 | 1.80E+06 | 1.90E+06 |          |
| Q87Q06 | Alanine dehydrogenase OS=Vibrio parahaemolyticus serotype O3:K6 (strain RIMD 2210633) GN=VP1103 PE=3 SV=1                                                                             | 4.01069519 | 3.99E+01 | 7.40E+05 | 1.30E+06 |          |          |          |          |
| Q87Q18 | Peptidoglycan-associated lipoprotein OS=Vibrio parahaemolyticus serotype O3:K6 (strain RIMD 2210633) GN=VP1061 PE=3 SV=1                                                              | 12.6436782 | 1.87E+01 | 1.30E+07 | 1.10E+07 | 1.90E+07 | 1.50E+07 | 1.50E+07 | 8.80E+06 |
| Q87Q16 | Cytochrome d ubiquinol oxidase, subunit I OS=Vibrio parahaemolyticus serotype O3:K6 (strain RIMD 2210633) GN=VP1053 PE=4 SV=1                                                         | 1.85873606 | 6.03E+01 |          |          | 2.80E+06 |          | 4.20E+06 | 2.70E+06 |
| Q87R04 | Formate acetyltransferase OS=Vibrio parahaemolyticus serotype O3:K6 (strain RIMD 2210633) GN=VP0994 PE=4 SV=1                                                                         | 1.71503958 | 8.45E+01 |          |          |          |          |          | 1.00E+06 |
| Q87R31 | Uncharacterized protein OS=Vibrio parahaemolyticus serotype O3:K6 (strain RIMD 2210633) GN=VP0967 PE=4 SV=1                                                                           | 8.67346939 | 2.18E+01 |          |          |          | 4.20E+06 |          |          |
| Q87R78 | DNA-binding protein HU-beta OS=Vibrio parahaemolyticus serotype O3:K6 (strain RIMD 2210633) GN=VP0920 PE=3 SV=1                                                                       | 12.2222222 | 9.40E+00 | 3.00E+06 |          |          |          |          |          |
| Q87R81 | Trigger factor OS=Vibrio parahaemolyticus serotype O3:K6 (strain RIMD 2210633) GN=trf PE=3 SV=1                                                                                       | 6.4516129  | 4.82E+01 |          |          |          |          | 1.80E+06 |          |
| Q87RE8 | Succinyl-CoA ligase [ADP-forming] subunit beta OS=Vibrio parahaemolyticus serotype O3:K6 (strain RIMD 2210633) GN=sucC PE=3 SV=1                                                      | 2.83505155 | 4.15E+01 |          | 1.40E+06 |          | 1.20E+06 |          |          |
| Q87RE9 | Dihydrodipicolinate residue succinyltransferase component of 2-oxoglutarate dehydrogenase complex OS=Vibrio parahaemolyticus serotype O3:K6 (strain RIMD 2210633) GN=VP0848 PE=3 SV=1 | 9.22693267 | 4.37E+01 | 3.60E+06 | 5.90E+06 | 2.50E+06 | 3.10E+06 | 3.40E+06 |          |
| Q87R19 | Uncharacterized protein OS=Vibrio parahaemolyticus serotype O3:K6 (strain RIMD 2210633) GN=VP0805 PE=4 SV=1                                                                           | 7.21311475 | 3.34E+01 | 5.30E+06 | 7.60E+06 | 4.80E+06 | 7.00E+06 | 6.70E+06 | 4.10E+06 |
| Q87RJ7 | Cysteine synthase OS=Vibrio parahaemolyticus serotype O3:K6 (strain RIMD 2210633) GN=VP0797 PE=3 SV=1                                                                                 | 7.14285714 | 3.41E+01 |          | 1.60E+06 | 1.40E+06 | 7.90E+05 | 1.80E+06 |          |
| Q87RL8 | Putative chitropin OS=Vibrio parahaemolyticus serotype O3:K6 (strain RIMD 2210633) GN=VP0760 PE=4 SV=1                                                                                | 23.0583003 | 4.08E+01 |          |          |          | 2.40E+06 | 1.90E+07 | 4.10E+07 |
| Q87RR2 | Serine hydroxymethyltransferase 1 OS=Vibrio parahaemolyticus serotype O3:K6 (strain RIMD 2210633) GN=glyA1 PE=3 SV=1                                                                  | 3.60576923 | 4.55E+01 |          |          |          |          | 1.10E+06 |          |
| Q87RS1 | Methionine import ATP-binding protein MetN OS=Vibrio parahaemolyticus serotype O3:K6 (strain RIMD 2210633) GN=metN PE=1 SV=1                                                          | 4.06976744 | 3.75E+01 |          |          |          |          |          |          |
| Q87RS3 | Lipoprotein OS=Vibrio parahaemolyticus serotype O3:K6 (strain RIMD 2210633) GN=VP0704 PE=3 SV=1                                                                                       | 46.4684015 | 2.91E+01 | 1.50E+07 | 1.70E+07 | 2.20E+07 | 2.00E+07 | 2.10E+07 | 2.00E+07 |
| Q87RX3 | Chaperone protein DnaK OS=Vibrio parahaemolyticus serotype O3:K6 (strain RIMD 2210633) GN=dnaK PE=3 SV=1                                                                              | 2.35478807 | 6.90E+01 |          | 4.40E+05 |          |          |          |          |
| Q87S35 | Uncharacterized protein OS=Vibrio parahaemolyticus serotype O3:K6 (strain RIMD 2210633) GN=VP0589 PE=4 SV=1                                                                           | 11.9266055 | 1.18E+01 | 5.60E+06 | 6.90E+06 | 7.80E+06 | 8.80E+06 | 5.60E+06 | 7.10E+06 |
